# Supplementary material for: Exploring the Molecular Mechanism of Liuwei Dihuang Pills for Treating Diabetic Nephropathy by Combined Network Pharmacology and Molecular Docking
Source: Research Square preprint supplement (doi:10.21203/rs.3.rs-463825/v1), 2021-05-05
Supplement: Supplementary file 1 [file 0c59c18b1d68e0faeed6d4f5.xls]

## Sheet: Sheet1
Category	GO	Description	CategoryID	_LogP_MyList	_PATTERN_	_RANK_	GiniIndex	PARENT_GO	LogP	Enrichment	Z-score	#TotalGeneInLibrary	#GeneInGO	#GeneInHitList	#GeneInGOAndHitList	%InGO	STDV %InGO	GeneID	Hits	Log(q-value)	EvidenceCutoff	GROUP_ID	FirstInGroupByEnrichment	FirstInGroupByLogP	BestLogPInGroup	BestEnrichmentInGroup	URL
GO Biological Processes	GO:0010035	response to inorganic substance	19	-40.7276	M1	1	0	19_GO:0050896 response to stimulus	-40.7276	16.5538	25.6789	27994	568	131	44	33.5878	4.12647	142|207|231|595|596|760|836|841|842|847|857|891|983|1017|1147|1244|1277|1543|1544|1545|1728|1800|1956|2353|3091|3162|3309|3383|3552|3725|4314|4318|4353|4780|5444|5530|5594|5599|5743|5970|6647|6772|7124|653361	PARP1|AKT1|AKR1B1|CCND1|BCL2|CA2|CASP3|CASP8|CASP9|CAT|CAV1|CCNB1|CDK1|CDK2|CHUK|ABCC2|COL1A1|CYP1A1|CYP1A2|CYP1B1|NQO1|DPEP1|EGFR|FOS|HIF1A|HMOX1|HSPA5|ICAM1|IL1A|JUN|MMP3|MMP9|MPO|NFE2L2|PON1|PPP3CA|MAPK1|MAPK8|PTGS2|RELA|SOD1|STAT1|TNF|NCF1	-36.529	0	1	1	1	-40.7276	67.4825
GO Biological Processes	GO:0009636	response to toxic substance	19	-36.5824	M1	1	0	19_GO:0050896 response to stimulus	-36.5824	16.3438	24.288	27994	523	131	40	30.5344	4.02387	196|581|595|596|598|836|841|847|891|983|1026|1147|1244|1277|1543|1545|1728|1812|2353|2944|2946|2950|3162|3383|3725|4353|4780|5444|5465|5530|5594|5742|5743|5970|6532|6647|6772|7124|9429|50506	AHR|BAX|CCND1|BCL2|BCL2L1|CASP3|CASP8|CAT|CCNB1|CDK1|CDKN1A|CHUK|ABCC2|COL1A1|CYP1A1|CYP1B1|NQO1|DRD1|FOS|GSTM1|GSTM2|GSTP1|HMOX1|ICAM1|JUN|MPO|NFE2L2|PON1|PPARA|PPP3CA|MAPK1|PTGS1|PTGS2|RELA|SLC6A4|SOD1|STAT1|TNF|ABCG2|DUOX2	-32.6847	0	2	1	1	-36.5824	19.0276
GO Biological Processes	GO:0006979	response to oxidative stress	19	-34.474	M1	1	0	19_GO:0050896 response to stimulus	-34.474	17.1512	23.9759	27994	461	131	37	28.2443	3.93331	142|207|240|596|836|847|983|1017|1147|1244|1277|1545|1728|1800|1956|2353|2950|3091|3162|3315|3725|4313|4314|4318|4353|4780|5594|5599|5742|5743|5970|6647|6772|7124|7157|50506|653361	PARP1|AKT1|ALOX5|BCL2|CASP3|CAT|CDK1|CDK2|CHUK|ABCC2|COL1A1|CYP1B1|NQO1|DPEP1|EGFR|FOS|GSTP1|HIF1A|HMOX1|HSPB1|JUN|MMP2|MMP3|MMP9|MPO|NFE2L2|MAPK1|MAPK8|PTGS1|PTGS2|RELA|SOD1|STAT1|TNF|TP53|DUOX2|NCF1	-30.7524	0	1	0	0	-40.7276	67.4825
GO Biological Processes	GO:0009611	response to wounding	19	-33.9492	M1	1	0	19_GO:0050896 response to stimulus	-33.9492	12.6768	21.5783	27994	708	131	42	32.0611	4.07768	152|240|581|596|836|857|891|959|983|1026|1277|1281|1543|1956|2064|2152|2155|2475|2697|3091|3162|3315|3552|3725|4780|5054|5321|5327|5328|5465|5467|5530|5578|5579|5594|5894|6647|6696|7056|7124|7422|50506	ADRA2C|ALOX5|BAX|BCL2|CASP3|CAV1|CCNB1|CD40LG|CDK1|CDKN1A|COL1A1|COL3A1|CYP1A1|EGFR|ERBB2|F3|F7|MTOR|GJA1|HIF1A|HMOX1|HSPB1|IL1A|JUN|NFE2L2|SERPINE1|PLA2G4A|PLAT|PLAU|PPARA|PPARD|PPP3CA|PRKCA|PRKCB|MAPK1|RAF1|SOD1|SPP1|THBD|TNF|VEGFA|DUOX2	-30.3526	0	3	1	1	-33.9492	45.7917
GO Biological Processes	GO:0010038	response to metal ion	19	-33.7348	M1	1	0	19_GO:0050896 response to stimulus	-33.7348	19.8514	24.8918	27994	366	131	34	25.9542	3.83017	142|207|595|596|760|836|841|842|847|857|891|983|1147|1244|1543|1544|1728|1800|1956|2353|3091|3162|3309|3383|3552|3725|4318|4780|5530|5594|5599|5743|6647|653361	PARP1|AKT1|CCND1|BCL2|CA2|CASP3|CASP8|CASP9|CAT|CAV1|CCNB1|CDK1|CHUK|ABCC2|CYP1A1|CYP1A2|NQO1|DPEP1|EGFR|FOS|HIF1A|HMOX1|HSPA5|ICAM1|IL1A|JUN|MMP9|NFE2L2|PPP3CA|MAPK1|MAPK8|PTGS2|SOD1|NCF1	-30.2351	0	1	0	0	-40.7276	67.4825
GO Biological Processes	GO:0009991	response to extracellular stimulus	19	-33.0531	M1	1	0	19_GO:0050896 response to stimulus	-33.0531	14.8182	22.4001	27994	548	131	38	29.0076	3.96485	153|154|207|595|596|847|1026|1277|1543|1728|1956|2155|2353|2475|2950|3162|3309|3383|3553|3627|3725|4353|4780|5444|5465|5467|5468|5594|5599|5743|5970|6532|6647|6696|6772|7157|7412|8648	ADRB1|ADRB2|AKT1|CCND1|BCL2|CAT|CDKN1A|COL1A1|CYP1A1|NQO1|EGFR|F7|FOS|MTOR|GSTP1|HMOX1|HSPA5|ICAM1|IL1B|CXCL10|JUN|MPO|NFE2L2|PON1|PPARA|PPARD|PPARG|MAPK1|MAPK8|PTGS2|RELA|SLC6A4|SOD1|SPP1|STAT1|TP53|VCAM1|NCOA1	-29.6326	0	4	1	1	-33.0531	30.5278
GO Biological Processes	GO:0071407	cellular response to organic cyclic compound	19	-32.7337	M1	1	0	19_GO:0050896 response to stimulus	-32.7337	15.3827	22.5663	27994	514	131	37	28.2443	3.93331	142|196|207|367|836|841|842|857|891|1244|1277|1543|1545|1812|1956|2002|2099|2100|2908|2946|2950|3309|3383|3553|4306|5241|5465|5467|5468|5594|5743|6347|6532|6647|6696|6772|7124	PARP1|AHR|AKT1|AR|CASP3|CASP8|CASP9|CAV1|CCNB1|ABCC2|COL1A1|CYP1A1|CYP1B1|DRD1|EGFR|ELK1|ESR1|ESR2|NR3C1|GSTM2|GSTP1|HSPA5|ICAM1|IL1B|NR3C2|PGR|PPARA|PPARD|PPARG|MAPK1|PTGS2|CCL2|SLC6A4|SOD1|SPP1|STAT1|TNF	-29.3802	0	5	1	1	-32.7337	19.2212
GO Biological Processes	GO:1901699	cellular response to nitrogen compound	19	-32.439	M1	1	0	19_GO:0050896 response to stimulus	-32.439	12.8345	21.1948	27994	666	131	40	30.5344	4.02387	142|154|196|207|231|598|760|836|857|1017|1129|1277|1281|1800|1812|1956|2475|2697|2932|2946|2950|3309|3383|3481|3553|3645|4313|4314|4780|5468|5579|5594|5743|5970|6532|6647|6772|7124|7157|7412	PARP1|ADRB2|AHR|AKT1|AKR1B1|BCL2L1|CA2|CASP3|CAV1|CDK2|CHRM2|COL1A1|COL3A1|DPEP1|DRD1|EGFR|MTOR|GJA1|GSK3B|GSTM2|GSTP1|HSPA5|ICAM1|IGF2|IL1B|INSRR|MMP2|MMP3|NFE2L2|PPARG|PRKCB|MAPK1|PTGS2|RELA|SLC6A4|SOD1|STAT1|TNF|TP53|VCAM1	-29.1435	0	6	1	1	-32.439	12.8345
GO Biological Processes	GO:0031667	response to nutrient levels	19	-31.3544	M1	1	0	19_GO:0050896 response to stimulus	-31.3544	14.9379	21.89	27994	515	131	36	27.4809	3.90037	153|154|207|595|596|847|1026|1277|1543|1728|1956|2155|2475|2950|3162|3309|3383|3553|3627|3725|4353|4780|5444|5465|5467|5468|5594|5599|5743|5970|6532|6647|6696|6772|7157|8648	ADRB1|ADRB2|AKT1|CCND1|BCL2|CAT|CDKN1A|COL1A1|CYP1A1|NQO1|EGFR|F7|MTOR|GSTP1|HMOX1|HSPA5|ICAM1|IL1B|CXCL10|JUN|MPO|NFE2L2|PON1|PPARA|PPARD|PPARG|MAPK1|MAPK8|PTGS2|RELA|SLC6A4|SOD1|SPP1|STAT1|TP53|NCOA1	-28.11	0	4	0	0	-33.0531	30.5278
GO Biological Processes	GO:0000302	response to reactive oxygen species	19	-30.6695	M1	1	0	19_GO:0050896 response to stimulus	-30.6695	25.3536	25.7615	27994	236	131	28	21.374	3.58171	207|596|836|847|983|1017|1147|1277|1545|1728|1800|1956|2353|2950|3162|3725|4313|4314|4318|4353|4780|5594|5599|5970|6647|6772|7124|653361	AKT1|BCL2|CASP3|CAT|CDK1|CDK2|CHUK|COL1A1|CYP1B1|NQO1|DPEP1|EGFR|FOS|GSTP1|HMOX1|JUN|MMP2|MMP3|MMP9|MPO|NFE2L2|MAPK1|MAPK8|RELA|SOD1|STAT1|TNF|NCF1	-27.4982	0	1	0	0	-40.7276	67.4825
GO Biological Processes	GO:0032496	response to lipopolysaccharide	19	-30.6555	M1	1	0	19_GO:0051704 multi-organism process	-30.6555	19.8339	23.7429	27994	334	131	31	23.6641	3.71342	207|836|841|842|1147|1244|1543|1544|2353|2697|2950|3383|3552|3553|3576|3627|4353|4792|5054|5467|5578|5594|5599|5743|5970|6347|6373|6401|6590|7056|7124	AKT1|CASP3|CASP8|CASP9|CHUK|ABCC2|CYP1A1|CYP1A2|FOS|GJA1|GSTP1|ICAM1|IL1A|IL1B|CXCL8|CXCL10|MPO|NFKBIA|SERPINE1|PPARD|PRKCA|MAPK1|MAPK8|PTGS2|RELA|CCL2|CXCL11|SELE|SLPI|THBD|TNF	-27.4982	0	7	1	1	-30.6555	19.8339
GO Biological Processes	GO:0034599	cellular response to oxidative stress	19	-30.1068	M1	1	0	19_GO:0050896 response to stimulus	-30.1068	20.5476	23.8077	27994	312	131	30	22.9008	3.67125	142|207|240|596|847|983|1017|1147|1545|1728|1800|1956|2353|2950|3091|3162|3315|3725|4313|4314|4318|4353|4780|5594|5599|5970|6647|7124|7157|653361	PARP1|AKT1|ALOX5|BCL2|CAT|CDK1|CDK2|CHUK|CYP1B1|NQO1|DPEP1|EGFR|FOS|GSTP1|HIF1A|HMOX1|HSPB1|JUN|MMP2|MMP3|MMP9|MPO|NFE2L2|MAPK1|MAPK8|RELA|SOD1|TNF|TP53|NCF1	-26.9873	0	1	0	0	-40.7276	67.4825
GO Biological Processes	GO:0002237	response to molecule of bacterial origin	19	-29.7904	M1	1	0	19_GO:0051704 multi-organism process	-29.7904	18.6082	22.9263	27994	356	131	31	23.6641	3.71342	207|836|841|842|1147|1244|1543|1544|2353|2697|2950|3383|3552|3553|3576|3627|4353|4792|5054|5467|5578|5594|5599|5743|5970|6347|6373|6401|6590|7056|7124	AKT1|CASP3|CASP8|CASP9|CHUK|ABCC2|CYP1A1|CYP1A2|FOS|GJA1|GSTP1|ICAM1|IL1A|IL1B|CXCL8|CXCL10|MPO|NFKBIA|SERPINE1|PPARD|PRKCA|MAPK1|MAPK8|PTGS2|RELA|CCL2|CXCL11|SELE|SLPI|THBD|TNF	-26.7057	0	7	0	0	-30.6555	19.8339
GO Biological Processes	GO:0071396	cellular response to lipid	19	-29.2679	M1	1	0	19_GO:0050896 response to stimulus	-29.2679	13.039	20.2654	27994	590	131	36	27.4809	3.90037	142|196|207|367|842|891|1244|1277|1869|1956|2002|2099|2100|2908|2950|3383|3552|3553|3576|3627|4306|4792|5054|5241|5465|5467|5468|5578|5594|5599|5970|6347|6373|6532|6696|7124	PARP1|AHR|AKT1|AR|CASP9|CCNB1|ABCC2|COL1A1|E2F1|EGFR|ELK1|ESR1|ESR2|NR3C1|GSTP1|ICAM1|IL1A|IL1B|CXCL8|CXCL10|NR3C2|NFKBIA|SERPINE1|PGR|PPARA|PPARD|PPARG|PRKCA|MAPK1|MAPK8|RELA|CCL2|CXCL11|SLC6A4|SPP1|TNF	-26.2153	0	5	0	0	-32.7337	19.2212
GO Biological Processes	GO:0071417	cellular response to organonitrogen compound	19	-28.9357	M1	1	0	19_GO:0050896 response to stimulus	-28.9357	12.7579	20.0138	27994	603	131	36	27.4809	3.90037	142|154|196|207|231|598|760|836|857|1277|1281|1812|1956|2475|2697|2932|2946|2950|3309|3383|3481|3553|3645|4313|4780|5468|5579|5594|5743|5970|6532|6647|6772|7124|7157|7412	PARP1|ADRB2|AHR|AKT1|AKR1B1|BCL2L1|CA2|CASP3|CAV1|COL1A1|COL3A1|DRD1|EGFR|MTOR|GJA1|GSK3B|GSTM2|GSTP1|HSPA5|ICAM1|IGF2|IL1B|INSRR|MMP2|NFE2L2|PPARG|PRKCB|MAPK1|PTGS2|RELA|SLC6A4|SOD1|STAT1|TNF|TP53|VCAM1	-25.9132	0	6	0	0	-32.439	12.8345
GO Biological Processes	GO:0097190	apoptotic signaling pathway	19	-28.7104	M1	1	0	19_GO:0023052 signaling	-28.7104	12.5703	19.8442	27994	612	131	36	27.4809	3.90037	142|207|367|581|596|598|836|841|842|857|1026|1545|1869|2932|2950|3091|3162|3315|3383|3458|3552|3553|3725|4318|4780|5054|5467|5578|5599|5743|5894|5925|5970|6647|7124|7157	PARP1|AKT1|AR|BAX|BCL2|BCL2L1|CASP3|CASP8|CASP9|CAV1|CDKN1A|CYP1B1|E2F1|GSK3B|GSTP1|HIF1A|HMOX1|HSPB1|ICAM1|IFNG|IL1A|IL1B|JUN|MMP9|NFE2L2|SERPINE1|PPARD|PRKCA|MAPK8|PTGS2|RAF1|RB1|RELA|SOD1|TNF|TP53	-25.7158	0	8	1	1	-28.7104	36.4845
GO Biological Processes	GO:0042060	wound healing	19	-27.9259	M1	1	0	19_GO:0050896 response to stimulus	-27.9259	12.6127	19.5985	27994	593	131	35	26.7176	3.86601	152|240|836|857|891|959|1026|1277|1281|1956|2064|2152|2155|2475|2697|3091|3162|3315|3552|4780|5054|5321|5327|5328|5465|5467|5530|5578|5579|5594|5894|7056|7124|7422|50506	ADRA2C|ALOX5|CASP3|CAV1|CCNB1|CD40LG|CDKN1A|COL1A1|COL3A1|EGFR|ERBB2|F3|F7|MTOR|GJA1|HIF1A|HMOX1|HSPB1|IL1A|NFE2L2|SERPINE1|PLA2G4A|PLAT|PLAU|PPARA|PPARD|PPP3CA|PRKCA|PRKCB|MAPK1|RAF1|THBD|TNF|VEGFA|DUOX2	-24.9577	0	3	0	0	-33.9492	45.7917
GO Biological Processes	GO:0070482	response to oxygen levels	19	-26.9935	M1	1	0	19_GO:0050896 response to stimulus	-26.9935	16.189	20.873	27994	396	131	30	22.9008	3.67125	207|596|836|847|857|891|1026|1277|1543|1803|1869|2155|2475|3091|3099|3162|3383|4313|4609|4780|5327|5328|5465|5467|5468|5743|5894|6532|7157|7422	AKT1|BCL2|CASP3|CAT|CAV1|CCNB1|CDKN1A|COL1A1|CYP1A1|DPP4|E2F1|F7|MTOR|HIF1A|HK2|HMOX1|ICAM1|MMP2|MYC|NFE2L2|PLAT|PLAU|PPARA|PPARD|PPARG|PTGS2|RAF1|SLC6A4|TP53|VEGFA	-24.0501	0	9	1	1	-26.9935	25.1405
GO Biological Processes	GO:0009410	response to xenobiotic stimulus	19	-26.8626	M1	1	0	19_GO:0050896 response to stimulus	-26.8626	20.2448	22.3909	27994	285	131	27	20.6107	3.5342	196|842|1244|1543|1544|1545|1576|1728|1800|1812|1869|1956|2155|2475|2908|2944|2946|2950|3309|3383|5468|5530|5742|5925|5970|6647|8856	AHR|CASP9|ABCC2|CYP1A1|CYP1A2|CYP1B1|CYP3A4|NQO1|DPEP1|DRD1|E2F1|EGFR|F7|MTOR|NR3C1|GSTM1|GSTM2|GSTP1|HSPA5|ICAM1|PPARG|PPP3CA|PTGS1|RB1|RELA|SOD1|NR1I2	-23.9427	0	10	1	1	-26.8626	22.432
GO Biological Processes	GO:0072593	reactive oxygen species metabolic process	19	-26.7386	M1	1	0	19_GO:0008152 metabolic process	-26.7386	20.0339	22.263	27994	288	131	27	20.6107	3.5342	207|240|596|847|857|1026|1543|1544|1545|1728|1956|2475|2950|3091|3099|3383|3458|3553|4314|4353|4780|5743|6647|7124|7157|50506|653361	AKT1|ALOX5|BCL2|CAT|CAV1|CDKN1A|CYP1A1|CYP1A2|CYP1B1|NQO1|EGFR|MTOR|GSTP1|HIF1A|HK2|ICAM1|IFNG|IL1B|MMP3|MPO|NFE2L2|PTGS2|SOD1|TNF|TP53|DUOX2|NCF1	-23.841	0	11	1	1	-26.7386	213.695
GO Biological Processes	GO:0048545	response to steroid hormone	19	-25.8818	M1	1	0	19_GO:0050896 response to stimulus	-25.8818	17.1938	20.8434	27994	348	131	28	21.374	3.58171	142|367|595|596|760|836|842|857|1026|1244|1277|1956|2099|2100|2353|2908|2950|3383|4306|5241|5465|5467|5743|5970|6696|7124|8648|10499	PARP1|AR|CCND1|BCL2|CA2|CASP3|CASP9|CAV1|CDKN1A|ABCC2|COL1A1|EGFR|ESR1|ESR2|FOS|NR3C1|GSTP1|ICAM1|NR3C2|PGR|PPARA|PPARD|PTGS2|RELA|SPP1|TNF|NCOA1|NCOA2	-23.0054	0	12	1	1	-25.8818	34.4669
GO Biological Processes	GO:1901652	response to peptide	19	-25.4958	M1	1	0	19_GO:0050896 response to stimulus	-25.4958	12.6634	18.7657	27994	540	131	32	24.4275	3.75393	142|154|207|231|760|847|857|1147|1244|1277|2155|2475|2697|2932|2950|3383|3481|3553|3645|4313|4314|4318|4780|4792|5465|5468|5579|5743|5970|6772|7157|7412	PARP1|ADRB2|AKT1|AKR1B1|CA2|CAT|CAV1|CHUK|ABCC2|COL1A1|F7|MTOR|GJA1|GSK3B|GSTP1|ICAM1|IGF2|IL1B|INSRR|MMP2|MMP3|MMP9|NFE2L2|NFKBIA|PPARA|PPARG|PRKCB|PTGS2|RELA|STAT1|TP53|VCAM1	-22.6395	0	6	0	0	-32.439	12.8345
GO Biological Processes	GO:2000147	positive regulation of cell motility	19	-25.4494	M1	1	0	19_GO:0040011 locomotion	-25.4494	11.8919	18.3821	27994	593	131	33	25.1908	3.79283	207|596|857|1277|1812|1950|1956|2152|2155|2475|3037|3091|3162|3309|3315|3383|3458|3553|3576|3627|3725|4318|4780|5054|5328|5530|5578|5594|5743|6401|7124|7422|50506	AKT1|BCL2|CAV1|COL1A1|DRD1|EGF|EGFR|F3|F7|MTOR|HAS2|HIF1A|HMOX1|HSPA5|HSPB1|ICAM1|IFNG|IL1B|CXCL8|CXCL10|JUN|MMP9|NFE2L2|SERPINE1|PLAU|PPP3CA|PRKCA|MAPK1|PTGS2|SELE|TNF|VEGFA|DUOX2	-22.6124	0	13	1	1	-25.4494	21.3695
GO Biological Processes	GO:0051272	positive regulation of cellular component movement	19	-25.0361	M1	1	0	19_GO:0048518 positive regulation of biological process	-25.0361	11.5416	18.0648	27994	611	131	33	25.1908	3.79283	207|596|857|1277|1812|1950|1956|2152|2155|2475|3037|3091|3162|3309|3315|3383|3458|3553|3576|3627|3725|4318|4780|5054|5328|5530|5578|5594|5743|6401|7124|7422|50506	AKT1|BCL2|CAV1|COL1A1|DRD1|EGF|EGFR|F3|F7|MTOR|HAS2|HIF1A|HMOX1|HSPA5|HSPB1|ICAM1|IFNG|IL1B|CXCL8|CXCL10|JUN|MMP9|NFE2L2|SERPINE1|PLAU|PPP3CA|PRKCA|MAPK1|PTGS2|SELE|TNF|VEGFA|DUOX2	-22.2177	0	13	0	0	-25.4494	21.3695
GO Biological Processes	GO:0035690	cellular response to drug	19	-24.9156	M1	1	0	19_GO:0050896 response to stimulus	-24.9156	15.8712	19.9331	27994	377	131	28	21.374	3.58171	196|842|983|1017|1129|1244|1545|1728|1800|1812|1956|2908|2946|3162|3309|3383|3553|4314|4609|4780|5530|5594|5743|5970|6647|7124|7157|8648	AHR|CASP9|CDK1|CDK2|CHRM2|ABCC2|CYP1B1|NQO1|DPEP1|DRD1|EGFR|NR3C1|GSTM2|HMOX1|HSPA5|ICAM1|IL1B|MMP3|MYC|NFE2L2|PPP3CA|MAPK1|PTGS2|RELA|SOD1|TNF|TP53|NCOA1	-22.1149	0	10	0	0	-26.8626	22.432
GO Biological Processes	GO:0030335	positive regulation of cell migration	19	-24.8389	M1	1	0	19_GO:0040011 locomotion	-24.8389	12.0604	18.2439	27994	567	131	32	24.4275	3.75393	207|596|857|1277|1812|1950|1956|2152|2155|2475|3037|3091|3162|3309|3315|3383|3458|3553|3576|3627|3725|4318|4780|5054|5328|5530|5578|5594|5743|6401|7124|7422	AKT1|BCL2|CAV1|COL1A1|DRD1|EGF|EGFR|F3|F7|MTOR|HAS2|HIF1A|HMOX1|HSPA5|HSPB1|ICAM1|IFNG|IL1B|CXCL8|CXCL10|JUN|MMP9|NFE2L2|SERPINE1|PLAU|PPP3CA|PRKCA|MAPK1|PTGS2|SELE|TNF|VEGFA	-22.0553	0	13	0	0	-25.4494	21.3695
GO Biological Processes	GO:0040017	positive regulation of locomotion	19	-24.8123	M1	1	0	19_GO:0040011 locomotion	-24.8123	11.3558	17.8942	27994	621	131	33	25.1908	3.79283	207|596|857|1277|1812|1950|1956|2152|2155|2475|3037|3091|3162|3309|3315|3383|3458|3553|3576|3627|3725|4318|4780|5054|5328|5530|5578|5594|5743|6401|7124|7422|50506	AKT1|BCL2|CAV1|COL1A1|DRD1|EGF|EGFR|F3|F7|MTOR|HAS2|HIF1A|HMOX1|HSPA5|HSPB1|ICAM1|IFNG|IL1B|CXCL8|CXCL10|JUN|MMP9|NFE2L2|SERPINE1|PLAU|PPP3CA|PRKCA|MAPK1|PTGS2|SELE|TNF|VEGFA|DUOX2	-22.045	0	13	0	0	-25.4494	21.3695
GO Biological Processes	GO:0001101	response to acid chemical	19	-24.5508	M1	1	0	19_GO:0050896 response to stimulus	-24.5508	16.6275	20.0853	27994	347	131	27	20.6107	3.5342	207|231|598|836|847|891|1147|1244|1277|1281|1728|1869|1956|2155|2475|2697|2950|3383|4313|5444|5468|5743|5970|6532|7124|7422|8648	AKT1|AKR1B1|BCL2L1|CASP3|CAT|CCNB1|CHUK|ABCC2|COL1A1|COL3A1|NQO1|E2F1|EGFR|F7|MTOR|GJA1|GSTP1|ICAM1|MMP2|PON1|PPARG|PTGS2|RELA|SLC6A4|TNF|VEGFA|NCOA1	-21.7993	0	14	1	1	-24.5508	24.3687
GO Biological Processes	GO:0010942	positive regulation of cell death	19	-24.5132	M1	1	0	19_GO:0048518 positive regulation of biological process	-24.5132	9.98573	17.0922	27994	749	131	35	26.7176	3.86601	142|207|581|596|598|836|841|842|857|959|1026|1509|1545|1728|1869|2002|2152|2353|2475|2932|3162|3458|3486|3725|4314|4318|4609|5468|5599|5743|6347|6647|7124|7157|8648	PARP1|AKT1|BAX|BCL2|BCL2L1|CASP3|CASP8|CASP9|CAV1|CD40LG|CDKN1A|CTSD|CYP1B1|NQO1|E2F1|ELK1|F3|FOS|MTOR|GSK3B|HMOX1|IFNG|IGFBP3|JUN|MMP3|MMP9|MYC|PPARG|MAPK8|PTGS2|CCL2|SOD1|TNF|TP53|NCOA1	-21.7769	0	15	1	1	-24.5132	30.8425
GO Biological Processes	GO:0001666	response to hypoxia	19	-24.1556	M1	1	0	19_GO:0050896 response to stimulus	-24.1556	16.0717	19.7073	27994	359	131	27	20.6107	3.5342	207|596|836|847|857|891|1543|1803|1869|2155|2475|3091|3099|3162|3383|4313|4609|4780|5327|5328|5465|5467|5743|5894|6532|7157|7422	AKT1|BCL2|CASP3|CAT|CAV1|CCNB1|CYP1A1|DPP4|E2F1|F7|MTOR|HIF1A|HK2|HMOX1|ICAM1|MMP2|MYC|NFE2L2|PLAT|PLAU|PPARA|PPARD|PTGS2|RAF1|SLC6A4|TP53|VEGFA	-21.434	0	9	0	0	-26.9935	25.1405
GO Biological Processes	GO:2001233	regulation of apoptotic signaling pathway	19	-23.823	M1	1	0	19_GO:0023052 signaling	-23.823	14.4878	18.9346	27994	413	131	28	21.374	3.58171	142|207|367|581|596|598|841|857|1869|2932|2950|3091|3162|3315|3383|3552|3553|4318|4780|5054|5599|5743|5894|5925|5970|6647|7124|7157	PARP1|AKT1|AR|BAX|BCL2|BCL2L1|CASP8|CAV1|E2F1|GSK3B|GSTP1|HIF1A|HMOX1|HSPB1|ICAM1|IL1A|IL1B|MMP9|NFE2L2|SERPINE1|MAPK8|PTGS2|RAF1|RB1|RELA|SOD1|TNF|TP53	-21.1157	0	8	0	0	-28.7104	36.4845
GO Biological Processes	GO:0036293	response to decreased oxygen levels	19	-23.7745	M1	1	0	19_GO:0050896 response to stimulus	-23.7745	15.5519	19.3472	27994	371	131	27	20.6107	3.5342	207|596|836|847|857|891|1543|1803|1869|2155|2475|3091|3099|3162|3383|4313|4609|4780|5327|5328|5465|5467|5743|5894|6532|7157|7422	AKT1|BCL2|CASP3|CAT|CAV1|CCNB1|CYP1A1|DPP4|E2F1|F7|MTOR|HIF1A|HK2|HMOX1|ICAM1|MMP2|MYC|NFE2L2|PLAT|PLAU|PPARA|PPARD|PTGS2|RAF1|SLC6A4|TP53|VEGFA	-21.081	0	9	0	0	-26.9935	25.1405
GO Biological Processes	GO:0050673	epithelial cell proliferation	19	-23.6644	M1	1	0	19_GO:0008283 cell proliferation	-23.6644	13.3272	18.3798	27994	465	131	29	22.1374	3.62737	207|240|367|581|595|857|1956|2064|2099|2152|2475|2697|3037|3091|3162|3481|3486|3725|4609|5241|5467|5468|5578|5594|5925|6347|6772|7124|7422	AKT1|ALOX5|AR|BAX|CCND1|CAV1|EGFR|ERBB2|ESR1|F3|MTOR|GJA1|HAS2|HIF1A|HMOX1|IGF2|IGFBP3|JUN|MYC|PGR|PPARD|PPARG|PRKCA|MAPK1|RB1|CCL2|STAT1|TNF|VEGFA	-20.9843	0	13	0	0	-25.4494	21.3695
GO Biological Processes	GO:0044706	multi-multicellular organism process	19	-23.5716	M1	1	0	19_GO:0051704 multi-organism process	-23.5716	21.7477	21.4733	27994	226	131	23	17.5573	3.32406	152|207|231|367|596|1244|1543|2099|2353|2475|2697|3553|4313|4318|5241|5467|5594|5743|6532|6647|6696|7056|7422	ADRA2C|AKT1|AKR1B1|AR|BCL2|ABCC2|CYP1A1|ESR1|FOS|MTOR|GJA1|IL1B|MMP2|MMP9|PGR|PPARD|MAPK1|PTGS2|SLC6A4|SOD1|SPP1|THBD|VEGFA	-20.9128	0	16	1	1	-23.5716	42.7389
GO Biological Processes	GO:0032870	cellular response to hormone stimulus	19	-23.5674	M1	1	0	19_GO:0050896 response to stimulus	-23.5674	10.3705	16.9617	27994	680	131	33	25.1908	3.79283	142|207|367|760|842|857|1129|1244|1956|2002|2099|2100|2353|2697|2908|2932|2950|3383|3481|3553|3645|4306|4780|5241|5465|5467|5468|5579|5970|6696|6772|8648|10499	PARP1|AKT1|AR|CA2|CASP9|CAV1|CHRM2|ABCC2|EGFR|ELK1|ESR1|ESR2|FOS|GJA1|NR3C1|GSK3B|GSTP1|ICAM1|IGF2|IL1B|INSRR|NR3C2|NFE2L2|PGR|PPARA|PPARD|PPARG|PRKCB|RELA|SPP1|STAT1|NCOA1|NCOA2	-20.9128	0	5	0	0	-32.7337	19.2212
GO Biological Processes	GO:0034614	cellular response to reactive oxygen species	19	-23.3303	M1	1	0	19_GO:0050896 response to stimulus	-23.3303	26.3976	22.7747	27994	170	131	21	16.0305	3.20552	207|983|1017|1147|1545|1728|1800|1956|2353|3725|4313|4314|4318|4353|4780|5594|5599|5970|6647|7124|653361	AKT1|CDK1|CDK2|CHUK|CYP1B1|NQO1|DPEP1|EGFR|FOS|JUN|MMP2|MMP3|MMP9|MPO|NFE2L2|MAPK1|MAPK8|RELA|SOD1|TNF|NCF1	-20.6879	0	1	0	0	-40.7276	67.4825
GO Biological Processes	GO:1901654	response to ketone	19	-23.3015	M1	1	0	19_GO:0050896 response to stimulus	-23.3015	23.5064	21.9024	27994	200	131	22	16.7939	3.26601	142|196|207|231|367|595|598|842|857|1026|1244|1956|2002|2155|2353|2908|3383|5468|5970|6696|8648|10499	PARP1|AHR|AKT1|AKR1B1|AR|CCND1|BCL2L1|CASP9|CAV1|CDKN1A|ABCC2|EGFR|ELK1|F7|FOS|NR3C1|ICAM1|PPARG|RELA|SPP1|NCOA1|NCOA2	-20.671	0	12	0	0	-25.8818	34.4669
GO Biological Processes	GO:0046677	response to antibiotic	19	-22.5529	M1	1	0	19_GO:0050896 response to stimulus	-22.5529	16.3876	19.1619	27994	326	131	25	19.084	3.43333	196|595|596|598|836|841|842|847|983|1147|1277|1543|1545|1728|2950|3162|3309|3383|3725|4780|5321|5970|6647|6772|7157	AHR|CCND1|BCL2|BCL2L1|CASP3|CASP8|CASP9|CAT|CDK1|CHUK|COL1A1|CYP1A1|CYP1B1|NQO1|GSTP1|HMOX1|HSPA5|ICAM1|JUN|NFE2L2|PLA2G4A|RELA|SOD1|STAT1|TP53	-19.934	0	2	0	0	-36.5824	19.0276
GO Biological Processes	GO:0071241	cellular response to inorganic substance	19	-22.3306	M1	1	0	19_GO:0050896 response to stimulus	-22.3306	21.2728	20.7465	27994	221	131	22	16.7939	3.26601	142|207|891|1017|1147|1543|1544|1728|1800|1956|2353|3162|3309|3725|4314|4318|4780|5594|5599|5743|6647|653361	PARP1|AKT1|CCNB1|CDK2|CHUK|CYP1A1|CYP1A2|NQO1|DPEP1|EGFR|FOS|HMOX1|HSPA5|JUN|MMP3|MMP9|NFE2L2|MAPK1|MAPK8|PTGS2|SOD1|NCF1	-19.723	0	1	0	0	-40.7276	67.4825
GO Biological Processes	GO:0007565	female pregnancy	19	-21.9979	M1	1	0	19_GO:0022414 reproductive process	-21.9979	22.8959	21.0926	27994	196	131	21	16.0305	3.20552	152|207|231|367|596|1244|2099|2353|2475|2697|3553|4313|4318|5241|5467|5594|5743|6647|6696|7056|7422	ADRA2C|AKT1|AKR1B1|AR|BCL2|ABCC2|ESR1|FOS|MTOR|GJA1|IL1B|MMP2|MMP9|PGR|PPARD|MAPK1|PTGS2|SOD1|SPP1|THBD|VEGFA	-19.4013	0	16	0	0	-23.5716	42.7389
GO Biological Processes	GO:2001234	negative regulation of apoptotic signaling pathway	19	-21.82	M1	1	0	19_GO:0048519 negative regulation of biological process	-21.82	20.1772	20.1554	27994	233	131	22	16.7939	3.26601	207|367|581|596|598|841|2932|2950|3091|3162|3315|3383|3552|3553|4318|4780|5054|5743|5894|5925|5970|7124	AKT1|AR|BAX|BCL2|BCL2L1|CASP8|GSK3B|GSTP1|HIF1A|HMOX1|HSPB1|ICAM1|IL1A|IL1B|MMP9|NFE2L2|SERPINE1|PTGS2|RAF1|RB1|RELA|TNF	-19.2341	0	8	0	0	-28.7104	36.4845
GO Biological Processes	GO:0071496	cellular response to external stimulus	19	-21.7	M1	1	0	19_GO:0050896 response to stimulus	-21.7	15.1342	18.3243	27994	353	131	25	19.084	3.43333	207|596|841|1026|1277|1956|2353|2475|2697|2950|3162|3309|3383|3553|3725|4780|5465|5468|5594|5599|5743|6647|7157|7412|8648	AKT1|BCL2|CASP8|CDKN1A|COL1A1|EGFR|FOS|MTOR|GJA1|GSTP1|HMOX1|HSPA5|ICAM1|IL1B|JUN|NFE2L2|PPARA|PPARG|MAPK1|MAPK8|PTGS2|SOD1|TP53|VCAM1|NCOA1	-19.1246	0	17	1	1	-21.7	15.1556
GO Biological Processes	GO:0050678	regulation of epithelial cell proliferation	19	-21.492	M1	1	0	19_GO:0008283 cell proliferation	-21.492	13.7187	17.6786	27994	405	131	26	19.8473	3.48477	207|240|367|581|595|857|1956|2064|2152|2475|2697|3037|3091|3162|3481|3725|4609|5241|5467|5468|5578|5925|6347|6772|7124|7422	AKT1|ALOX5|AR|BAX|CCND1|CAV1|EGFR|ERBB2|F3|MTOR|GJA1|HAS2|HIF1A|HMOX1|IGF2|JUN|MYC|PGR|PPARD|PPARG|PRKCA|RB1|CCL2|STAT1|TNF|VEGFA	-18.9268	0	13	0	0	-25.4494	21.3695
GO Biological Processes	GO:0001568	blood vessel development	19	-21.4687	M1	1	0	19_GO:0032502 developmental process	-21.4687	8.88152	15.4483	27994	794	131	33	25.1908	3.79283	196|207|240|581|857|1277|1281|1545|1950|2064|2152|3037|3091|3099|3162|3315|3552|3553|3576|3627|3725|4313|4780|5054|5468|5578|5579|5594|5743|6347|6772|7124|7422	AHR|AKT1|ALOX5|BAX|CAV1|COL1A1|COL3A1|CYP1B1|EGF|ERBB2|F3|HAS2|HIF1A|HK2|HMOX1|HSPB1|IL1A|IL1B|CXCL8|CXCL10|JUN|MMP2|NFE2L2|SERPINE1|PPARG|PRKCA|PRKCB|MAPK1|PTGS2|CCL2|STAT1|TNF|VEGFA	-18.9135	0	13	0	0	-25.4494	21.3695
GO Biological Processes	GO:0009617	response to bacterium	19	-21.0652	M1	1	0	19_GO:0051704 multi-organism process	-21.0652	9.06927	15.4015	27994	754	131	32	24.4275	3.75393	207|836|841|842|857|1147|1244|1543|1544|2353|2697|2950|3383|3552|3553|3576|3627|4353|4792|5054|5467|5578|5594|5599|5743|5970|6347|6373|6401|6590|7056|7124	AKT1|CASP3|CASP8|CASP9|CAV1|CHUK|ABCC2|CYP1A1|CYP1A2|FOS|GJA1|GSTP1|ICAM1|IL1A|IL1B|CXCL8|CXCL10|MPO|NFKBIA|SERPINE1|PPARD|PRKCA|MAPK1|MAPK8|PTGS2|RELA|CCL2|CXCL11|SELE|SLPI|THBD|TNF	-18.5198	0	7	0	0	-30.6555	19.8339
GO Biological Processes	GO:0018209	peptidyl-serine modification	19	-21.0047	M1	1	0	19_GO:0008152 metabolic process	-21.0047	15.4014	18.1276	27994	333	131	24	18.3206	3.3798	142|207|581|596|857|891|983|1017|1147|1812|1956|2475|2932|3458|3551|5578|5579|5594|5599|5743|5894|7124|7150|7422	PARP1|AKT1|BAX|BCL2|CAV1|CCNB1|CDK1|CDK2|CHUK|DRD1|EGFR|MTOR|GSK3B|IFNG|IKBKB|PRKCA|PRKCB|MAPK1|MAPK8|PTGS2|RAF1|TNF|TOP1|VEGFA	-18.4688	0	18	1	1	-21.0047	17.6445
GO Biological Processes	GO:0007584	response to nutrient	19	-20.9714	M1	1	0	19_GO:0050896 response to stimulus	-20.9714	20.4913	19.8555	27994	219	131	21	16.0305	3.20552	595|847|1277|1543|1728|1956|2155|2475|2950|3162|3553|3627|5467|5468|5743|5970|6532|6647|6696|6772|8648	CCND1|CAT|COL1A1|CYP1A1|NQO1|EGFR|F7|MTOR|GSTP1|HMOX1|IL1B|CXCL10|PPARD|PPARG|PTGS2|RELA|SLC6A4|SOD1|SPP1|STAT1|NCOA1	-18.4448	0	4	0	0	-33.0531	30.5278
GO Biological Processes	GO:0071248	cellular response to metal ion	19	-20.6594	M1	1	0	19_GO:0050896 response to stimulus	-20.6594	22.1445	20.2112	27994	193	131	20	15.2672	3.14246	142|207|891|1147|1543|1544|1728|1800|1956|2353|3162|3309|3725|4318|4780|5594|5599|5743|6647|653361	PARP1|AKT1|CCNB1|CHUK|CYP1A1|CYP1A2|NQO1|DPEP1|EGFR|FOS|HMOX1|HSPA5|JUN|MMP9|NFE2L2|MAPK1|MAPK8|PTGS2|SOD1|NCF1	-18.142	0	1	0	0	-40.7276	67.4825
GO Biological Processes	GO:0018105	peptidyl-serine phosphorylation	19	-20.4111	M1	1	0	19_GO:0008152 metabolic process	-20.4111	15.8548	18.0334	27994	310	131	23	17.5573	3.32406	207|581|596|857|891|983|1017|1147|1812|1956|2475|2932|3458|3551|5578|5579|5594|5599|5743|5894|7124|7150|7422	AKT1|BAX|BCL2|CAV1|CCNB1|CDK1|CDK2|CHUK|DRD1|EGFR|MTOR|GSK3B|IFNG|IKBKB|PRKCA|PRKCB|MAPK1|MAPK8|PTGS2|RAF1|TNF|TOP1|VEGFA	-17.9027	0	18	0	0	-21.0047	17.6445
GO Biological Processes	GO:0009314	response to radiation	19	-20.3862	M1	1	0	19_GO:0050896 response to stimulus	-20.3862	12.4019	16.6815	27994	448	131	26	19.8473	3.48477	142|207|581|595|596|598|836|842|847|1026|1281|1812|1956|2002|2353|2475|3091|3309|3383|3627|4609|5599|5743|5970|7056|7157	PARP1|AKT1|BAX|CCND1|BCL2|BCL2L1|CASP3|CASP9|CAT|CDKN1A|COL3A1|DRD1|EGFR|ELK1|FOS|MTOR|HIF1A|HSPA5|ICAM1|CXCL10|MYC|MAPK8|PTGS2|RELA|THBD|TP53	-17.8865	0	19	1	1	-20.3862	38.1598
GO Biological Processes	GO:2000377	regulation of reactive oxygen species metabolic process	19	-20.3455	M1	1	0	19_GO:0050789 regulation of biological process	-20.3455	21.3695	19.8228	27994	200	131	20	15.2672	3.14246	207|240|596|857|1026|1545|1956|2475|2950|3091|3099|3383|3458|3553|4314|4780|5743|6647|7124|7157	AKT1|ALOX5|BCL2|CAV1|CDKN1A|CYP1B1|EGFR|MTOR|GSTP1|HIF1A|HK2|ICAM1|IFNG|IL1B|MMP3|NFE2L2|PTGS2|SOD1|TNF|TP53	-17.8544	0	11	0	0	-26.7386	213.695
GO Biological Processes	GO:0032355	response to estradiol	19	-20.2829	M1	1	0	19_GO:0050896 response to stimulus	-20.2829	27.2802	21.451	27994	141	131	18	13.7405	3.00794	595|836|841|842|847|1244|1277|1544|1728|1956|2099|2100|2155|2697|2950|5743|6532|8648	CCND1|CASP3|CASP8|CASP9|CAT|ABCC2|COL1A1|CYP1A2|NQO1|EGFR|ESR1|ESR2|F7|GJA1|GSTP1|PTGS2|SLC6A4|NCOA1	-17.8003	0	4	0	0	-33.0531	30.5278
GO Biological Processes	GO:0030155	regulation of cell adhesion	19	-20.2541	M1	1	0	19_GO:0022610 biological adhesion	-20.2541	8.97633	15.0573	27994	738	131	31	23.6641	3.71342	207|240|596|836|857|959|1277|1545|1803|2064|2932|3037|3383|3458|3481|3552|3553|3559|3572|3576|5054|5328|5465|5530|5578|5970|6347|6401|7124|7412|7422	AKT1|ALOX5|BCL2|CASP3|CAV1|CD40LG|COL1A1|CYP1B1|DPP4|ERBB2|GSK3B|HAS2|ICAM1|IFNG|IGF2|IL1A|IL1B|IL2RA|IL6ST|CXCL8|SERPINE1|PLAU|PPARA|PPP3CA|PRKCA|RELA|CCL2|SELE|TNF|VCAM1|VEGFA	-17.7797	0	20	1	1	-20.2541	16.3681
GO Biological Processes	GO:0070997	neuron death	19	-20.2073	M1	1	0	19_GO:0009987 cellular process	-20.2073	14.2463	17.3449	27994	360	131	24	18.3206	3.3798	142|207|581|596|598|836|841|842|1728|2002|2353|2475|2932|3091|3162|3309|3458|3725|5465|5925|6347|6647|7124|7157	PARP1|AKT1|BAX|BCL2|BCL2L1|CASP3|CASP8|CASP9|NQO1|ELK1|FOS|MTOR|GSK3B|HIF1A|HMOX1|HSPA5|IFNG|JUN|PPARA|RB1|CCL2|SOD1|TNF|TP53	-17.7411	0	15	0	0	-24.5132	30.8425
GO Biological Processes	GO:0033002	muscle cell proliferation	19	-19.9812	M1	1	0	19_GO:0008283 cell proliferation	-19.9812	18.3918	18.7091	27994	244	131	21	16.0305	3.20552	207|231|891|983|1026|1956|2475|2697|2950|3162|3458|3486|3725|4313|4318|5467|5468|5594|5743|6772|7124	AKT1|AKR1B1|CCNB1|CDK1|CDKN1A|EGFR|MTOR|GJA1|GSTP1|HMOX1|IFNG|IGFBP3|JUN|MMP2|MMP9|PPARD|PPARG|MAPK1|PTGS2|STAT1|TNF	-17.5229	0	21	1	1	-19.9812	24.8965
GO Biological Processes	GO:0071216	cellular response to biotic stimulus	19	-19.9068	M1	1	0	19_GO:0050896 response to stimulus	-19.9068	18.2422	18.6248	27994	246	131	21	16.0305	3.20552	207|1244|2932|2950|3309|3383|3552|3553|3576|3627|4792|5054|5467|5578|5594|5599|5970|6347|6373|7124|7157	AKT1|ABCC2|GSK3B|GSTP1|HSPA5|ICAM1|IL1A|IL1B|CXCL8|CXCL10|NFKBIA|SERPINE1|PPARD|PRKCA|MAPK1|MAPK8|RELA|CCL2|CXCL11|TNF|TP53	-17.4563	0	7	0	0	-30.6555	19.8339
GO Biological Processes	GO:0043068	positive regulation of programmed cell death	19	-19.8956	M1	1	0	19_GO:0048518 positive regulation of biological process	-19.8956	9.21098	15.0411	27994	696	131	30	22.9008	3.67125	207|581|596|598|836|841|842|857|959|1026|1509|1545|1728|1869|2152|2932|3162|3458|3486|3725|4318|4609|5468|5599|5743|6347|6647|7124|7157|8648	AKT1|BAX|BCL2|BCL2L1|CASP3|CASP8|CASP9|CAV1|CD40LG|CDKN1A|CTSD|CYP1B1|NQO1|E2F1|F3|GSK3B|HMOX1|IFNG|IGFBP3|JUN|MMP9|MYC|PPARG|MAPK8|PTGS2|CCL2|SOD1|TNF|TP53|NCOA1	-17.4528	0	15	0	0	-24.5132	30.8425
GO Biological Processes	GO:0071466	cellular response to xenobiotic stimulus	19	-19.7419	M1	1	0	19_GO:0050896 response to stimulus	-19.7419	22.432	19.8347	27994	181	131	19	14.5038	3.07666	196|842|1244|1543|1544|1545|1576|1728|1800|1869|1956|2908|2944|2946|2950|3383|5742|5925|8856	AHR|CASP9|ABCC2|CYP1A1|CYP1A2|CYP1B1|CYP3A4|NQO1|DPEP1|E2F1|EGFR|NR3C1|GSTM1|GSTM2|GSTP1|ICAM1|PTGS1|RB1|NR1I2	-17.3067	0	10	0	0	-26.8626	22.432
GO Biological Processes	GO:0048514	blood vessel morphogenesis	19	-19.704	M1	1	0	19_GO:0032502 developmental process	-19.704	9.06767	14.8979	27994	707	131	30	22.9008	3.67125	207|240|581|857|1281|1545|1950|2064|2152|3037|3091|3099|3162|3315|3552|3553|3576|3627|3725|4313|4780|5054|5468|5578|5579|5743|6347|6772|7124|7422	AKT1|ALOX5|BAX|CAV1|COL3A1|CYP1B1|EGF|ERBB2|F3|HAS2|HIF1A|HK2|HMOX1|HSPB1|IL1A|IL1B|CXCL8|CXCL10|JUN|MMP2|NFE2L2|SERPINE1|PPARG|PRKCA|PRKCB|PTGS2|CCL2|STAT1|TNF|VEGFA	-17.2762	0	13	0	0	-25.4494	21.3695
GO Biological Processes	GO:0008285	negative regulation of cell proliferation	19	-19.4308	M1	1	0	19_GO:0008283 cell proliferation	-19.4308	8.40677	14.4613	27994	788	131	31	23.6641	3.71342	240|367|581|596|836|857|1026|1545|1869|2064|2697|2950|3162|3458|3486|3552|3553|3559|3576|3725|4609|5467|5468|5743|5894|5925|6347|6532|6772|7124|7157	ALOX5|AR|BAX|BCL2|CASP3|CAV1|CDKN1A|CYP1B1|E2F1|ERBB2|GJA1|GSTP1|HMOX1|IFNG|IGFBP3|IL1A|IL1B|IL2RA|CXCL8|JUN|MYC|PPARD|PPARG|PTGS2|RAF1|RB1|CCL2|SLC6A4|STAT1|TNF|TP53	-17.0102	0	22	1	1	-19.4308	18.0224
GO Biological Processes	GO:0046686	response to cadmium ion	19	-19.3333	M1	1	0	19_GO:0050896 response to stimulus	-19.3333	46.7457	25.1218	27994	64	131	14	10.687	2.69929	207|847|983|1147|1544|1956|2353|3162|3725|4318|5594|5599|6647|653361	AKT1|CAT|CDK1|CHUK|CYP1A2|EGFR|FOS|HMOX1|JUN|MMP9|MAPK1|MAPK8|SOD1|NCF1	-16.92	0	1	0	0	-40.7276	67.4825
GO Biological Processes	GO:0048511	rhythmic process	19	-19.2265	M1	1	0	19_GO:0048511 rhythmic process	-19.2265	15.3637	17.3231	27994	306	131	22	16.7939	3.26601	153|196|836|983|1956|2099|2155|2475|2932|3037|3309|3725|5054|5241|5465|5468|5599|6532|7150|7157|8648|10499	ADRB1|AHR|CASP3|CDK1|EGFR|ESR1|F7|MTOR|GSK3B|HAS2|HSPA5|JUN|SERPINE1|PGR|PPARA|PPARG|MAPK8|SLC6A4|TOP1|TP53|NCOA1|NCOA2	-16.8202	0	23	1	1	-19.2265	15.684
GO Biological Processes	GO:0097191	extrinsic apoptotic signaling pathway	19	-19.1238	M1	1	0	19_GO:0023052 signaling	-19.1238	18.5821	18.3587	27994	230	131	20	15.2672	3.14246	207|367|581|596|598|836|841|842|857|2932|2950|3162|3383|3458|3552|3553|5054|5894|5970|7124	AKT1|AR|BAX|BCL2|BCL2L1|CASP3|CASP8|CASP9|CAV1|GSK3B|GSTP1|HMOX1|ICAM1|IFNG|IL1A|IL1B|SERPINE1|RAF1|RELA|TNF	-16.7245	0	8	0	0	-28.7104	36.4845
GO Biological Processes	GO:0051090	regulation of DNA-binding transcription factor activity	19	-19.0213	M1	1	0	19_GO:0050789 regulation of biological process	-19.0213	11.7415	15.8395	27994	455	131	25	19.084	3.43333	207|367|847|857|959|1147|1545|2099|2100|2353|3162|3383|3551|3553|3725|4792|5468|5530|5579|5594|5599|5925|5970|7124|7422	AKT1|AR|CAT|CAV1|CD40LG|CHUK|CYP1B1|ESR1|ESR2|FOS|HMOX1|ICAM1|IKBKB|IL1B|JUN|NFKBIA|PPARG|PPP3CA|PRKCB|MAPK1|MAPK8|RB1|RELA|TNF|VEGFA	-16.6288	0	24	1	1	-19.0213	42.7389
GO Biological Processes	GO:0070848	response to growth factor	19	-19.002	M1	1	0	19_GO:0050896 response to stimulus	-19.002	8.5592	14.3787	27994	749	131	30	22.9008	3.67125	142|207|836|847|857|860|1277|1281|1869|1956|2002|2064|2353|2908|2950|3037|3091|3309|3315|3553|3576|3725|4609|5579|5594|5894|5970|6347|7157|7422	PARP1|AKT1|CASP3|CAT|CAV1|RUNX2|COL1A1|COL3A1|E2F1|EGFR|ELK1|ERBB2|FOS|NR3C1|GSTP1|HAS2|HIF1A|HSPA5|HSPB1|IL1B|CXCL8|JUN|MYC|PRKCB|MAPK1|RAF1|RELA|CCL2|TP53|VEGFA	-16.6162	0	25	1	1	-19.002	8.5592
GO Biological Processes	GO:0043065	positive regulation of apoptotic process	19	-18.9682	M1	1	0	19_GO:0048518 positive regulation of biological process	-18.9682	9.02059	14.5947	27994	687	131	29	22.1374	3.62737	207|581|596|598|836|841|842|857|959|1509|1545|1728|1869|2152|2932|3162|3458|3486|3725|4318|4609|5468|5599|5743|6347|6647|7124|7157|8648	AKT1|BAX|BCL2|BCL2L1|CASP3|CASP8|CASP9|CAV1|CD40LG|CTSD|CYP1B1|NQO1|E2F1|F3|GSK3B|HMOX1|IFNG|IGFBP3|JUN|MMP9|MYC|PPARG|MAPK8|PTGS2|CCL2|SOD1|TNF|TP53|NCOA1	-16.5891	0	15	0	0	-24.5132	30.8425
GO Biological Processes	GO:0040008	regulation of growth	19	-18.934	M1	1	0	19_GO:0040007 growth	-18.934	8.9944	14.5687	27994	689	131	29	22.1374	3.62737	153|154|207|367|596|598|891|983|1026|1956|2064|2100|2475|2697|2932|3091|3458|3481|3486|5465|5467|5468|5594|5925|6532|6647|6696|7157|7422	ADRB1|ADRB2|AKT1|AR|BCL2|BCL2L1|CCNB1|CDK1|CDKN1A|EGFR|ERBB2|ESR2|MTOR|GJA1|GSK3B|HIF1A|IFNG|IGF2|IGFBP3|PPARA|PPARD|PPARG|MAPK1|RB1|SLC6A4|SOD1|SPP1|TP53|VEGFA	-16.5614	0	26	1	1	-18.934	11.7784
GO Biological Processes	GO:0050878	regulation of body fluid levels	19	-18.8559	M1	1	0	19_GO:0065007 biological regulation	-18.8559	10.7676	15.3555	27994	516	131	26	19.8473	3.48477	152|231|595|857|959|1277|1281|2152|2155|2697|3037|3091|3099|3315|4780|5054|5321|5327|5328|5578|5579|5594|5894|7056|7422|8648	ADRA2C|AKR1B1|CCND1|CAV1|CD40LG|COL1A1|COL3A1|F3|F7|GJA1|HAS2|HIF1A|HK2|HSPB1|NFE2L2|SERPINE1|PLA2G4A|PLAT|PLAU|PRKCA|PRKCB|MAPK1|RAF1|THBD|VEGFA|NCOA1	-16.4897	0	3	0	0	-33.9492	45.7917
GO Biological Processes	GO:0034612	response to tumor necrosis factor	19	-18.8069	M1	1	0	19_GO:0050896 response to stimulus	-18.8069	14.6915	16.8903	27994	320	131	22	16.7939	3.26601	207|836|841|959|1147|1244|1277|2950|3037|3383|3551|3576|4780|4792|5594|5743|5970|6347|6401|6772|7124|7157	AKT1|CASP3|CASP8|CD40LG|CHUK|ABCC2|COL1A1|GSTP1|HAS2|ICAM1|IKBKB|CXCL8|NFE2L2|NFKBIA|MAPK1|PTGS2|RELA|CCL2|SELE|STAT1|TNF|TP53	-16.4471	0	24	0	0	-19.0213	42.7389
GO Biological Processes	GO:0071276	cellular response to cadmium ion	19	-18.7939	M1	1	0	19_GO:0050896 response to stimulus	-18.7939	67.4825	28.1195	27994	38	131	12	9.16031	2.52033	207|1147|1544|1956|2353|3162|3725|4318|5594|5599|6647|653361	AKT1|CHUK|CYP1A2|EGFR|FOS|HMOX1|JUN|MMP9|MAPK1|MAPK8|SOD1|NCF1	-16.4403	0	1	0	0	-40.7276	67.4825
GO Biological Processes	GO:1901214	regulation of neuron death	19	-18.7777	M1	1	0	19_GO:0050789 regulation of biological process	-18.7777	14.6457	16.8604	27994	321	131	22	16.7939	3.26601	142|207|581|596|598|836|841|842|1728|2002|2353|2475|2932|3091|3162|3458|3725|5465|6347|6647|7124|7157	PARP1|AKT1|BAX|BCL2|BCL2L1|CASP3|CASP8|CASP9|NQO1|ELK1|FOS|MTOR|GSK3B|HIF1A|HMOX1|IFNG|JUN|PPARA|CCL2|SOD1|TNF|TP53	-16.4303	0	15	0	0	-24.5132	30.8425
GO Biological Processes	GO:0003006	developmental process involved in reproduction	19	-18.6806	M1	1	0	19_GO:0022414 reproductive process	-18.6806	8.80276	14.3774	27994	704	131	29	22.1374	3.62737	207|367|581|595|596|598|836|841|891|1956|2099|2475|2697|3091|3309|3383|3481|3552|3553|3645|5241|5467|5468|5594|5743|6647|6696|7422|8648	AKT1|AR|BAX|CCND1|BCL2|BCL2L1|CASP3|CASP8|CCNB1|EGFR|ESR1|MTOR|GJA1|HIF1A|HSPA5|ICAM1|IGF2|IL1A|IL1B|INSRR|PGR|PPARD|PPARG|MAPK1|PTGS2|SOD1|SPP1|VEGFA|NCOA1	-16.3393	0	27	1	1	-18.6806	17.6945
GO Biological Processes	GO:0048660	regulation of smooth muscle cell proliferation	19	-18.6432	M1	1	0	19_GO:0008283 cell proliferation	-18.6432	22.2341	19.2096	27994	173	131	18	13.7405	3.00794	207|231|1026|1956|2475|2697|2950|3162|3458|3486|3725|4313|4318|5467|5468|5743|6772|7124	AKT1|AKR1B1|CDKN1A|EGFR|MTOR|GJA1|GSTP1|HMOX1|IFNG|IGFBP3|JUN|MMP2|MMP9|PPARD|PPARG|PTGS2|STAT1|TNF	-16.3078	0	21	0	0	-19.9812	24.8965
GO Biological Processes	GO:0048659	smooth muscle cell proliferation	19	-18.5519	M1	1	0	19_GO:0008283 cell proliferation	-18.5519	21.98	19.0898	27994	175	131	18	13.7405	3.00794	207|231|1026|1956|2475|2697|2950|3162|3458|3486|3725|4313|4318|5467|5468|5743|6772|7124	AKT1|AKR1B1|CDKN1A|EGFR|MTOR|GJA1|GSTP1|HMOX1|IFNG|IGFBP3|JUN|MMP2|MMP9|PPARD|PPARG|PTGS2|STAT1|TNF	-16.2225	0	21	0	0	-19.9812	24.8965
GO Biological Processes	GO:0009612	response to mechanical stimulus	19	-18.5429	M1	1	0	19_GO:0050896 response to stimulus	-18.5429	19.4268	18.3343	27994	209	131	19	14.5038	3.07666	207|841|891|1277|1281|1956|2353|2697|3553|3627|3725|4353|4792|5468|5599|5743|5894|5970|6772	AKT1|CASP8|CCNB1|COL1A1|COL3A1|EGFR|FOS|GJA1|IL1B|CXCL10|JUN|MPO|NFKBIA|PPARG|MAPK8|PTGS2|RAF1|RELA|STAT1	-16.2193	0	28	1	1	-18.5429	21.64
GO Biological Processes	GO:0062012	regulation of small molecule metabolic process	19	-18.4437	M1	1	0	19_GO:0050789 regulation of biological process	-18.4437	11.1068	15.3307	27994	481	131	25	19.084	3.43333	142|207|857|891|983|1728|1950|2194|2475|2932|3037|3091|3458|3481|3486|3553|4953|5465|5467|5468|5743|6647|7124|7157|10499	PARP1|AKT1|CAV1|CCNB1|CDK1|NQO1|EGF|FASN|MTOR|GSK3B|HAS2|HIF1A|IFNG|IGF2|IGFBP3|IL1B|ODC1|PPARA|PPARD|PPARG|PTGS2|SOD1|TNF|TP53|NCOA2	-16.1258	0	29	1	1	-18.4437	33.7413
GO Biological Processes	GO:0002521	leukocyte differentiation	19	-18.3881	M1	1	0	19_GO:0002376 immune system process	-18.3881	10.3081	14.962	27994	539	131	26	19.8473	3.48477	142|581|596|760|841|860|959|2064|2194|2353|2475|3458|3552|3553|3559|3725|4318|4609|5468|5578|5925|6647|7124|7157|7412|7422	PARP1|BAX|BCL2|CA2|CASP8|RUNX2|CD40LG|ERBB2|FASN|FOS|MTOR|IFNG|IL1A|IL1B|IL2RA|JUN|MMP9|MYC|PPARG|PRKCA|RB1|SOD1|TNF|TP53|VCAM1|VEGFA	-16.0759	0	30	1	1	-18.3881	31.6585
GO Biological Processes	GO:0001525	angiogenesis	19	-18.1363	M1	1	0	19_GO:0032502 developmental process	-18.1363	9.44314	14.4687	27994	611	131	27	20.6107	3.5342	207|240|857|1545|1950|2064|2152|3091|3099|3162|3315|3552|3553|3576|3627|3725|4313|4780|5054|5468|5578|5579|5743|6347|6772|7124|7422	AKT1|ALOX5|CAV1|CYP1B1|EGF|ERBB2|F3|HIF1A|HK2|HMOX1|HSPB1|IL1A|IL1B|CXCL8|CXCL10|JUN|MMP2|NFE2L2|SERPINE1|PPARG|PRKCA|PRKCB|PTGS2|CCL2|STAT1|TNF|VEGFA	-15.8297	0	13	0	0	-25.4494	21.3695
GO Biological Processes	GO:0048608	reproductive structure development	19	-18.0915	M1	1	0	19_GO:0022414 reproductive process	-18.0915	11.5511	15.3664	27994	444	131	24	18.3206	3.3798	207|367|581|595|596|598|836|841|1956|2099|2697|3091|3309|3383|3481|5241|5467|5468|5594|5743|6647|6696|7422|8648	AKT1|AR|BAX|CCND1|BCL2|BCL2L1|CASP3|CASP8|EGFR|ESR1|GJA1|HIF1A|HSPA5|ICAM1|IGF2|PGR|PPARD|PPARG|MAPK1|PTGS2|SOD1|SPP1|VEGFA|NCOA1	-15.7959	0	27	0	0	-18.6806	17.6945
GO Biological Processes	GO:0048732	gland development	19	-18.0915	M1	1	0	19_GO:0032502 developmental process	-18.0915	11.5511	15.3664	27994	444	131	24	18.3206	3.3798	207|367|581|595|596|857|1543|1950|1956|2099|2194|3091|3099|3162|3481|3725|5241|5594|5894|5970|6647|7124|7422|8648	AKT1|AR|BAX|CCND1|BCL2|CAV1|CYP1A1|EGF|EGFR|ESR1|FASN|HIF1A|HK2|HMOX1|IGF2|JUN|PGR|MAPK1|RAF1|RELA|SOD1|TNF|VEGFA|NCOA1	-15.7959	0	31	1	1	-18.0915	106.847
GO Biological Processes	GO:0061458	reproductive system development	19	-18.002	M1	1	0	19_GO:0032502 developmental process	-18.002	11.4479	15.2857	27994	448	131	24	18.3206	3.3798	207|367|581|595|596|598|836|841|1956|2099|2697|3091|3309|3383|3481|5241|5467|5468|5594|5743|6647|6696|7422|8648	AKT1|AR|BAX|CCND1|BCL2|BCL2L1|CASP3|CASP8|EGFR|ESR1|GJA1|HIF1A|HSPA5|ICAM1|IGF2|PGR|PPARD|PPARG|MAPK1|PTGS2|SOD1|SPP1|VEGFA|NCOA1	-15.7118	0	27	0	0	-18.6806	17.6945
GO Biological Processes	GO:0043434	response to peptide hormone	19	-17.9797	M1	1	0	19_GO:0050896 response to stimulus	-17.9797	11.4224	15.2657	27994	449	131	24	18.3206	3.3798	142|207|760|847|857|1147|1244|1277|2155|2475|2697|2932|2950|3383|3481|3553|3645|4780|5465|5468|5579|5743|5970|6772	PARP1|AKT1|CA2|CAT|CAV1|CHUK|ABCC2|COL1A1|F7|MTOR|GJA1|GSK3B|GSTP1|ICAM1|IGF2|IL1B|INSRR|NFE2L2|PPARA|PPARG|PRKCB|PTGS2|RELA|STAT1	-15.6949	0	6	0	0	-32.439	12.8345
GO Biological Processes	GO:1903409	reactive oxygen species biosynthetic process	19	-17.908	M1	1	0	19_GO:0008152 metabolic process	-17.908	26.7118	19.9916	27994	128	131	16	12.2137	2.8609	207|240|857|1543|1544|1545|1728|2475|3383|3458|3553|4353|5743|6647|7124|50506	AKT1|ALOX5|CAV1|CYP1A1|CYP1A2|CYP1B1|NQO1|MTOR|ICAM1|IFNG|IL1B|MPO|PTGS2|SOD1|TNF|DUOX2	-15.6284	0	11	0	0	-26.7386	213.695
GO Biological Processes	GO:1903034	regulation of response to wounding	19	-17.6177	M1	1	0	19_GO:0050896 response to stimulus	-17.6177	19.5254	17.8916	27994	197	131	18	13.7405	3.00794	240|857|1026|2152|2155|2475|2697|4780|5054|5321|5327|5328|5467|5578|6696|7056|7124|50506	ALOX5|CAV1|CDKN1A|F3|F7|MTOR|GJA1|NFE2L2|SERPINE1|PLA2G4A|PLAT|PLAU|PPARD|PRKCA|SPP1|THBD|TNF|DUOX2	-15.3433	0	3	0	0	-33.9492	45.7917
GO Biological Processes	GO:2001237	negative regulation of extrinsic apoptotic signaling pathway	19	-17.5853	M1	1	0	19_GO:0048519 negative regulation of biological process	-17.5853	29.9572	20.5776	27994	107	131	15	11.4504	2.78207	207|367|596|598|841|2932|2950|3162|3383|3552|3553|5054|5894|5970|7124	AKT1|AR|BCL2|BCL2L1|CASP8|GSK3B|GSTP1|HMOX1|ICAM1|IL1A|IL1B|SERPINE1|RAF1|RELA|TNF	-15.3161	0	8	0	0	-28.7104	36.4845
GO Biological Processes	GO:0007568	aging	19	-17.5676	M1	1	0	19_GO:0032502 developmental process	-17.5676	14.0677	16.0952	27994	319	131	21	16.0305	3.20552	207|596|842|847|983|1026|1543|1728|2353|2475|3383|3725|4353|4780|5054|5530|5594|5743|5970|6647|7157	AKT1|BCL2|CASP9|CAT|CDK1|CDKN1A|CYP1A1|NQO1|FOS|MTOR|ICAM1|JUN|MPO|NFE2L2|SERPINE1|PPP3CA|MAPK1|PTGS2|RELA|SOD1|TP53	-15.3035	0	17	0	0	-21.7	15.1556
GO Biological Processes	GO:0061041	regulation of wound healing	19	-17.5481	M1	1	0	19_GO:0050896 response to stimulus	-17.5481	22.017	18.5657	27994	165	131	17	12.9771	2.93609	240|857|1026|2152|2155|2475|2697|4780|5054|5321|5327|5328|5467|5578|7056|7124|50506	ALOX5|CAV1|CDKN1A|F3|F7|MTOR|GJA1|NFE2L2|SERPINE1|PLA2G4A|PLAT|PLAU|PPARD|PRKCA|THBD|TNF|DUOX2	-15.2889	0	3	0	0	-33.9492	45.7917
GO Biological Processes	GO:0071363	cellular response to growth factor stimulus	19	-17.3871	M1	1	0	19_GO:0050896 response to stimulus	-17.3871	8.32191	13.6381	27994	719	131	28	21.374	3.58171	142|207|836|847|857|860|1277|1281|1869|1956|2064|2353|2908|2950|3037|3091|3309|3315|3553|3576|3725|5579|5594|5894|5970|6347|7157|7422	PARP1|AKT1|CASP3|CAT|CAV1|RUNX2|COL1A1|COL3A1|E2F1|EGFR|ERBB2|FOS|NR3C1|GSTP1|HAS2|HIF1A|HSPA5|HSPB1|IL1B|CXCL8|JUN|PRKCB|MAPK1|RAF1|RELA|CCL2|TP53|VEGFA	-15.1329	0	25	0	0	-19.002	8.5592
GO Biological Processes	GO:0031668	cellular response to extracellular stimulus	19	-17.3696	M1	1	0	19_GO:0050896 response to stimulus	-17.3696	15.1556	16.382	27994	282	131	20	15.2672	3.14246	596|1026|1277|2353|2475|2950|3162|3309|3383|3725|4780|5465|5468|5594|5599|5743|6647|7157|7412|8648	BCL2|CDKN1A|COL1A1|FOS|MTOR|GSTP1|HMOX1|HSPA5|ICAM1|JUN|NFE2L2|PPARA|PPARG|MAPK1|MAPK8|PTGS2|SOD1|TP53|VCAM1|NCOA1	-15.1203	0	17	0	0	-21.7	15.1556
GO Biological Processes	GO:1903037	regulation of leukocyte cell-cell adhesion	19	-17.2935	M1	1	0	19_GO:0022610 biological adhesion	-17.2935	13.6401	15.8135	27994	329	131	21	16.0305	3.20552	207|240|836|857|959|1803|2064|3037|3383|3458|3481|3552|3553|3559|3572|5465|5970|6347|6401|7124|7412	AKT1|ALOX5|CASP3|CAV1|CD40LG|DPP4|ERBB2|HAS2|ICAM1|IFNG|IGF2|IL1A|IL1B|IL2RA|IL6ST|PPARA|RELA|CCL2|SELE|TNF|VCAM1	-15.0491	0	20	0	0	-20.2541	16.3681
GO Biological Processes	GO:0045785	positive regulation of cell adhesion	19	-17.279	M1	1	0	19_GO:0022610 biological adhesion	-17.279	11.4836	14.9862	27994	428	131	23	17.5573	3.32406	207|240|857|959|1803|2064|2932|3037|3383|3458|3481|3552|3553|3559|3572|5530|5578|5970|6347|6401|7124|7412|7422	AKT1|ALOX5|CAV1|CD40LG|DPP4|ERBB2|GSK3B|HAS2|ICAM1|IFNG|IGF2|IL1A|IL1B|IL2RA|IL6ST|PPP3CA|PRKCA|RELA|CCL2|SELE|TNF|VCAM1|VEGFA	-15.0394	0	20	0	0	-20.2541	16.3681
GO Biological Processes	GO:0032787	monocarboxylic acid metabolic process	19	-17.2246	M1	1	0	19_GO:0008152 metabolic process	-17.2246	8.68939	13.75	27994	664	131	27	20.6107	3.5342	125|207|240|857|1244|1543|1544|1545|1576|2194|2475|2944|2946|2950|3091|3099|3458|3553|4048|5321|5444|5465|5467|5468|5742|5743|7157	ADH1B|AKT1|ALOX5|CAV1|ABCC2|CYP1A1|CYP1A2|CYP1B1|CYP3A4|FASN|MTOR|GSTM1|GSTM2|GSTP1|HIF1A|HK2|IFNG|IL1B|LTA4H|PLA2G4A|PON1|PPARA|PPARD|PPARG|PTGS1|PTGS2|TP53	-14.9897	0	32	1	1	-17.2246	56.5662
GO Biological Processes	GO:0071222	cellular response to lipopolysaccharide	19	-17.1924	M1	1	0	19_GO:0051704 multi-organism process	-17.1924	18.4928	17.363	27994	208	131	18	13.7405	3.00794	207|1244|2950|3383|3552|3553|3576|3627|4792|5054|5467|5578|5594|5599|5970|6347|6373|7124	AKT1|ABCC2|GSTP1|ICAM1|IL1A|IL1B|CXCL8|CXCL10|NFKBIA|SERPINE1|PPARD|PRKCA|MAPK1|MAPK8|RELA|CCL2|CXCL11|TNF	-14.9623	0	7	0	0	-30.6555	19.8339
GO Biological Processes	GO:0097193	intrinsic apoptotic signaling pathway	19	-17.1314	M1	1	0	19_GO:0023052 signaling	-17.1314	14.7376	16.1244	27994	290	131	20	15.2672	3.14246	142|207|581|596|598|836|842|857|1026|1545|1869|3091|3162|3315|4318|4780|5743|6647|7124|7157	PARP1|AKT1|BAX|BCL2|BCL2L1|CASP3|CASP9|CAV1|CDKN1A|CYP1B1|E2F1|HIF1A|HMOX1|HSPB1|MMP9|NFE2L2|PTGS2|SOD1|TNF|TP53	-14.9059	0	33	1	1	-17.1314	47.4877
GO Biological Processes	GO:0022407	regulation of cell-cell adhesion	19	-16.9935	M1	1	0	19_GO:0022610 biological adhesion	-16.9935	11.1451	14.7244	27994	441	131	23	17.5573	3.32406	207|240|836|857|959|1803|2064|3037|3383|3458|3481|3552|3553|3559|3572|5465|5578|5970|6347|6401|7124|7412|7422	AKT1|ALOX5|CASP3|CAV1|CD40LG|DPP4|ERBB2|HAS2|ICAM1|IFNG|IGF2|IL1A|IL1B|IL2RA|IL6ST|PPARA|PRKCA|RELA|CCL2|SELE|TNF|VCAM1|VEGFA	-14.7726	0	20	0	0	-20.2541	16.3681
GO Biological Processes	GO:0007169	transmembrane receptor protein tyrosine kinase signaling pathway	19	-16.8684	M1	1	0	19_GO:0023052 signaling	-16.8684	7.94615	13.2488	27994	753	131	28	21.374	3.58171	154|207|367|836|860|1277|1950|1956|2064|2152|2155|2932|3091|3315|3481|3486|3553|3645|4313|4318|5327|5578|5579|5594|5894|5970|7422|653361	ADRB2|AKT1|AR|CASP3|RUNX2|COL1A1|EGF|EGFR|ERBB2|F3|F7|GSK3B|HIF1A|HSPB1|IGF2|IGFBP3|IL1B|INSRR|MMP2|MMP9|PLAT|PRKCA|PRKCB|MAPK1|RAF1|RELA|VEGFA|NCF1	-14.652	0	25	0	0	-19.002	8.5592
GO Biological Processes	GO:0071219	cellular response to molecule of bacterial origin	19	-16.6853	M1	1	0	19_GO:0051704 multi-organism process	-16.6853	17.3266	16.7461	27994	222	131	18	13.7405	3.00794	207|1244|2950|3383|3552|3553|3576|3627|4792|5054|5467|5578|5594|5599|5970|6347|6373|7124	AKT1|ABCC2|GSTP1|ICAM1|IL1A|IL1B|CXCL8|CXCL10|NFKBIA|SERPINE1|PPARD|PRKCA|MAPK1|MAPK8|RELA|CCL2|CXCL11|TNF	-14.4734	0	7	0	0	-30.6555	19.8339
GO Biological Processes	GO:1901216	positive regulation of neuron death	19	-16.6227	M1	1	0	19_GO:0048518 positive regulation of biological process	-16.6227	30.8425	20.1878	27994	97	131	14	10.687	2.69929	142|581|836|841|842|1728|2002|2353|2475|2932|3458|3725|7124|7157	PARP1|BAX|CASP3|CASP8|CASP9|NQO1|ELK1|FOS|MTOR|GSK3B|IFNG|JUN|TNF|TP53	-14.4153	0	15	0	0	-24.5132	30.8425
GO Biological Processes	GO:0006367	transcription initiation from RNA polymerase II promoter	19	-16.5373	M1	1	0	19_GO:0008152 metabolic process	-16.5373	19.2212	17.2343	27994	189	131	17	12.9771	2.93609	367|581|595|860|891|983|1026|2099|2100|2908|4306|5241|5465|5467|5468|7157|8856	AR|BAX|CCND1|RUNX2|CCNB1|CDK1|CDKN1A|ESR1|ESR2|NR3C1|NR3C2|PGR|PPARA|PPARD|PPARG|TP53|NR1I2	-14.3342	0	5	0	0	-32.7337	19.2212
GO Biological Processes	GO:0080135	regulation of cellular response to stress	19	-16.5036	M1	1	0	19_GO:0050896 response to stimulus	-16.5036	7.69081	12.9779	27994	778	131	28	21.374	3.58171	142|207|240|581|596|598|842|857|959|1956|2475|2932|2950|3091|3309|3315|3553|4314|4609|4780|5594|5743|6647|6696|7124|7157|7422|653361	PARP1|AKT1|ALOX5|BAX|BCL2|BCL2L1|CASP9|CAV1|CD40LG|EGFR|MTOR|GSK3B|GSTP1|HIF1A|HSPA5|HSPB1|IL1B|MMP3|MYC|NFE2L2|MAPK1|PTGS2|SOD1|SPP1|TNF|TP53|VEGFA|NCF1	-14.3049	0	33	0	0	-17.1314	47.4877
GO Biological Processes	GO:0007159	leukocyte cell-cell adhesion	19	-16.4014	M1	1	0	19_GO:0022610 biological adhesion	-16.4014	12.3285	14.917	27994	364	131	21	16.0305	3.20552	207|240|836|857|959|1803|2064|3037|3383|3458|3481|3552|3553|3559|3572|5465|5970|6347|6401|7124|7412	AKT1|ALOX5|CASP3|CAV1|CD40LG|DPP4|ERBB2|HAS2|ICAM1|IFNG|IGF2|IL1A|IL1B|IL2RA|IL6ST|PPARA|RELA|CCL2|SELE|TNF|VCAM1	-14.207	0	20	0	0	-20.2541	16.3681
GO Biological Processes	GO:0051098	regulation of binding	19	-16.3055	M1	1	0	19_GO:0065007 biological regulation	-16.3055	12.1945	14.8224	27994	368	131	21	16.0305	3.20552	142|154|207|581|857|1026|1869|1950|2932|3162|3458|3725|4318|4792|5444|5465|5468|5530|5599|5925|6590	PARP1|ADRB2|AKT1|BAX|CAV1|CDKN1A|E2F1|EGF|GSK3B|HMOX1|IFNG|JUN|MMP9|NFKBIA|PON1|PPARA|PPARG|PPP3CA|MAPK8|RB1|SLPI	-14.1173	0	34	1	1	-16.3055	17.9743
GO Biological Processes	GO:0071900	regulation of protein serine/threonine kinase activity	19	-16.3031	M1	1	0	19_GO:0050789 regulation of biological process	-16.3031	9.64036	13.7965	27994	532	131	24	18.3206	3.3798	154|207|595|836|857|891|959|983|1026|1950|1956|2064|2950|3315|3458|3481|3553|3627|5594|5894|5925|6647|7124|7422	ADRB2|AKT1|CCND1|CASP3|CAV1|CCNB1|CD40LG|CDK1|CDKN1A|EGF|EGFR|ERBB2|GSTP1|HSPB1|IFNG|IGF2|IL1B|CXCL10|MAPK1|RAF1|RB1|SOD1|TNF|VEGFA	-14.1173	0	35	1	1	-16.3031	20.6801
GO Biological Processes	GO:0009416	response to light stimulus	19	-16.2982	M1	1	0	19_GO:0050896 response to stimulus	-16.2982	13.3559	15.2426	27994	320	131	20	15.2672	3.14246	142|207|581|595|596|836|842|847|1026|1812|1956|2002|2353|2475|3091|4609|5599|5743|5970|7157	PARP1|AKT1|BAX|CCND1|BCL2|CASP3|CASP9|CAT|CDKN1A|DRD1|EGFR|ELK1|FOS|MTOR|HIF1A|MYC|MAPK8|PTGS2|RELA|TP53	-14.1166	0	19	0	0	-20.3862	38.1598
GO Biological Processes	GO:1903039	positive regulation of leukocyte cell-cell adhesion	19	-16.2447	M1	1	0	19_GO:0022610 biological adhesion	-16.2447	16.3681	16.2218	27994	235	131	18	13.7405	3.00794	207|240|857|959|1803|3037|3383|3458|3481|3552|3553|3559|3572|5970|6347|6401|7124|7412	AKT1|ALOX5|CAV1|CD40LG|DPP4|HAS2|ICAM1|IFNG|IGF2|IL1A|IL1B|IL2RA|IL6ST|RELA|CCL2|SELE|TNF|VCAM1	-14.0673	0	20	0	0	-20.2541	16.3681
GO Biological Processes	GO:2001236	regulation of extrinsic apoptotic signaling pathway	19	-16.2363	M1	1	0	19_GO:0023052 signaling	-16.2363	21.1056	17.5975	27994	162	131	16	12.2137	2.8609	207|367|596|598|841|857|2932|2950|3162|3383|3552|3553|5054|5894|5970|7124	AKT1|AR|BCL2|BCL2L1|CASP8|CAV1|GSK3B|GSTP1|HMOX1|ICAM1|IL1A|IL1B|SERPINE1|RAF1|RELA|TNF	-14.063	0	8	0	0	-28.7104	36.4845
GO Biological Processes	GO:0042110	T cell activation	19	-16.1113	M1	1	0	19_GO:0002376 immune system process	-16.1113	10.1549	13.9309	27994	484	131	23	17.5573	3.32406	207|581|596|836|841|857|860|959|1803|2064|2475|3383|3458|3481|3552|3553|3559|3572|5530|6347|6647|7157|7412	AKT1|BAX|BCL2|CASP3|CASP8|CAV1|RUNX2|CD40LG|DPP4|ERBB2|MTOR|ICAM1|IFNG|IGF2|IL1A|IL1B|IL2RA|IL6ST|PPP3CA|CCL2|SOD1|TP53|VCAM1	-13.942	0	20	0	0	-20.2541	16.3681
GO Biological Processes	GO:0008015	blood circulation	19	-16.0134	M1	1	0	19_GO:0032501 multicellular organismal process	-16.0134	9.35889	13.5502	27994	548	131	24	18.3206	3.3798	152|153|154|207|367|857|1129|1812|1956|2475|2697|2946|3162|3383|3627|5465|5467|5468|5742|5743|6532|6647|6772|7422	ADRA2C|ADRB1|ADRB2|AKT1|AR|CAV1|CHRM2|DRD1|EGFR|MTOR|GJA1|GSTM2|HMOX1|ICAM1|CXCL10|PPARA|PPARD|PPARG|PTGS1|PTGS2|SLC6A4|SOD1|STAT1|VEGFA	-13.8482	0	36	1	1	-16.0134	50.2811
GO Biological Processes	GO:0071214	cellular response to abiotic stimulus	19	-15.9633	M1	1	0	19_GO:0050896 response to stimulus	-15.9633	12.8345	14.8965	27994	333	131	20	15.2672	3.14246	142|207|231|581|598|836|841|842|1026|1277|1956|2002|2697|3309|3553|3645|4609|5599|5743|7157	PARP1|AKT1|AKR1B1|BAX|BCL2L1|CASP3|CASP8|CASP9|CDKN1A|COL1A1|EGFR|ELK1|GJA1|HSPA5|IL1B|INSRR|MYC|MAPK8|PTGS2|TP53	-13.8061	0	19	0	0	-20.3862	38.1598
GO Biological Processes	GO:0104004	cellular response to environmental stimulus	19	-15.9633	M1	1	0	19_GO:0050896 response to stimulus	-15.9633	12.8345	14.8965	27994	333	131	20	15.2672	3.14246	142|207|231|581|598|836|841|842|1026|1277|1956|2002|2697|3309|3553|3645|4609|5599|5743|7157	PARP1|AKT1|AKR1B1|BAX|BCL2L1|CASP3|CASP8|CASP9|CDKN1A|COL1A1|EGFR|ELK1|GJA1|HSPA5|IL1B|INSRR|MYC|MAPK8|PTGS2|TP53	-13.8061	0	19	0	0	-20.3862	38.1598
GO Biological Processes	GO:0003013	circulatory system process	19	-15.8197	M1	1	0	19_GO:0032501 multicellular organismal process	-15.8197	9.17473	13.3867	27994	559	131	24	18.3206	3.3798	152|153|154|207|367|857|1129|1812|1956|2475|2697|2946|3162|3383|3627|5465|5467|5468|5742|5743|6532|6647|6772|7422	ADRA2C|ADRB1|ADRB2|AKT1|AR|CAV1|CHRM2|DRD1|EGFR|MTOR|GJA1|GSTM2|HMOX1|ICAM1|CXCL10|PPARA|PPARD|PPARG|PTGS1|PTGS2|SLC6A4|SOD1|STAT1|VEGFA	-13.6663	0	36	0	0	-16.0134	50.2811
GO Biological Processes	GO:0006352	DNA-templated transcription, initiation	19	-15.7991	M1	1	0	19_GO:0008152 metabolic process	-15.7991	15.4478	15.702	27994	249	131	18	13.7405	3.00794	367|581|595|860|891|983|1026|2099|2100|2908|3725|4306|5241|5465|5467|5468|7157|8856	AR|BAX|CCND1|RUNX2|CCNB1|CDK1|CDKN1A|ESR1|ESR2|NR3C1|JUN|NR3C2|PGR|PPARA|PPARD|PPARG|TP53|NR1I2	-13.6497	0	5	0	0	-32.7337	19.2212
GO Biological Processes	GO:0009411	response to UV	19	-15.7336	M1	1	0	19_GO:0050896 response to stimulus	-15.7336	22.7335	17.7398	27994	141	131	15	11.4504	2.78207	142|207|581|595|596|836|842|847|1026|1956|4609|5599|5743|5970|7157	PARP1|AKT1|BAX|CCND1|BCL2|CASP3|CASP9|CAT|CDKN1A|EGFR|MYC|MAPK8|PTGS2|RELA|TP53	-13.5881	0	19	0	0	-20.3862	38.1598
GO Biological Processes	GO:0071356	cellular response to tumor necrosis factor	19	-15.6788	M1	1	0	19_GO:0050896 response to stimulus	-15.6788	13.6707	15.0525	27994	297	131	19	14.5038	3.07666	207|841|959|1147|1244|1277|2950|3037|3383|3551|3576|4780|4792|5594|5970|6347|6772|7124|7157	AKT1|CASP8|CD40LG|CHUK|ABCC2|COL1A1|GSTP1|HAS2|ICAM1|IKBKB|CXCL8|NFE2L2|NFKBIA|MAPK1|RELA|CCL2|STAT1|TNF|TP53	-13.5371	0	24	0	0	-19.0213	42.7389
GO Biological Processes	GO:0006631	fatty acid metabolic process	19	-15.6647	M1	1	0	19_GO:0008152 metabolic process	-15.6647	11.3323	14.1988	27994	396	131	21	16.0305	3.20552	207|240|857|1543|1544|1545|1576|2194|2475|2944|2946|2950|3553|4048|5321|5444|5465|5467|5468|5742|5743	AKT1|ALOX5|CAV1|CYP1A1|CYP1A2|CYP1B1|CYP3A4|FASN|MTOR|GSTM1|GSTM2|GSTP1|IL1B|LTA4H|PLA2G4A|PON1|PPARA|PPARD|PPARG|PTGS1|PTGS2	-13.5267	0	32	0	0	-17.2246	56.5662
GO Biological Processes	GO:0045596	negative regulation of cell differentiation	19	-15.5965	M1	1	0	19_GO:0048519 negative regulation of biological process	-15.5965	7.47378	12.507	27994	772	131	27	20.6107	3.5342	595|596|857|1281|1869|1956|2064|2932|3458|3553|3627|4318|4609|4780|4792|5465|5467|5468|5530|5594|5925|6532|6696|6772|7124|7157|7422	CCND1|BCL2|CAV1|COL3A1|E2F1|EGFR|ERBB2|GSK3B|IFNG|IL1B|CXCL10|MMP9|MYC|NFE2L2|NFKBIA|PPARA|PPARD|PPARG|PPP3CA|MAPK1|RB1|SLC6A4|SPP1|STAT1|TNF|TP53|VEGFA	-13.4623	0	37	1	1	-15.5965	53.4237
GO Biological Processes	GO:0045765	regulation of angiogenesis	19	-15.4907	M1	1	0	19_GO:0032502 developmental process	-15.4907	11.1079	14.0321	27994	404	131	21	16.0305	3.20552	240|1545|2064|2152|3091|3099|3162|3315|3552|3553|3576|3627|4780|5054|5468|5578|5579|5743|6772|7124|7422	ALOX5|CYP1B1|ERBB2|F3|HIF1A|HK2|HMOX1|HSPB1|IL1A|IL1B|CXCL8|CXCL10|NFE2L2|SERPINE1|PPARG|PRKCA|PRKCB|PTGS2|STAT1|TNF|VEGFA	-13.3603	0	13	0	0	-25.4494	21.3695
GO Biological Processes	GO:0033273	response to vitamin	19	-15.4036	M1	1	0	19_GO:0050896 response to stimulus	-15.4036	30.5278	19.3452	27994	91	131	13	9.92366	2.6122	595|847|1277|1543|1956|2155|2950|3627|5467|5468|5743|5970|6696	CCND1|CAT|COL1A1|CYP1A1|EGFR|F7|GSTP1|CXCL10|PPARD|PPARG|PTGS2|RELA|SPP1	-13.2769	0	4	0	0	-33.0531	30.5278
GO Biological Processes	GO:0001936	regulation of endothelial cell proliferation	19	-15.0891	M1	1	0	19_GO:0008283 cell proliferation	-15.0891	17.9011	16.0706	27994	191	131	16	12.2137	2.8609	207|240|857|2152|2475|2697|3091|3162|3481|3725|5468|5578|6347|6772|7124|7422	AKT1|ALOX5|CAV1|F3|MTOR|GJA1|HIF1A|HMOX1|IGF2|JUN|PPARG|PRKCA|CCL2|STAT1|TNF|VEGFA	-12.966	0	13	0	0	-25.4494	21.3695
GO Biological Processes	GO:0009266	response to temperature stimulus	19	-14.9727	M1	1	0	19_GO:0050896 response to stimulus	-14.9727	15.5248	15.2987	27994	234	131	17	12.9771	2.93609	153|154|207|841|1026|1244|2353|2475|2932|3162|3552|3627|4792|5468|5594|5743|6647	ADRB1|ADRB2|AKT1|CASP8|CDKN1A|ABCC2|FOS|MTOR|GSK3B|HMOX1|IL1A|CXCL10|NFKBIA|PPARG|MAPK1|PTGS2|SOD1	-12.8532	0	38	1	1	-14.9727	18.9951
GO Biological Processes	GO:0022409	positive regulation of cell-cell adhesion	19	-14.93	M1	1	0	19_GO:0022610 biological adhesion	-14.93	13.7868	14.7181	27994	279	131	18	13.7405	3.00794	207|240|857|959|1803|3037|3383|3458|3481|3552|3553|3559|3572|5970|6347|6401|7124|7412	AKT1|ALOX5|CAV1|CD40LG|DPP4|HAS2|ICAM1|IFNG|IGF2|IL1A|IL1B|IL2RA|IL6ST|RELA|CCL2|SELE|TNF|VCAM1	-12.8141	0	20	0	0	-20.2541	16.3681
GO Biological Processes	GO:0010817	regulation of hormone levels	19	-14.9141	M1	1	0	19_GO:0065007 biological regulation	-14.9141	8.93632	12.8891	27994	550	131	23	17.5573	3.32406	125|152|231|240|1244|1543|1544|1545|1576|1803|1956|2099|2697|3091|3458|3553|5467|5530|5578|5894|6696|7124|50506	ADH1B|ADRA2C|AKR1B1|ALOX5|ABCC2|CYP1A1|CYP1A2|CYP1B1|CYP3A4|DPP4|EGFR|ESR1|GJA1|HIF1A|IFNG|IL1B|PPARD|PPP3CA|PRKCA|RAF1|SPP1|TNF|DUOX2	-12.8018	0	39	1	1	-14.9141	64.1084
GO Biological Processes	GO:0030099	myeloid cell differentiation	19	-14.8907	M1	1	0	19_GO:0002376 immune system process	-14.8907	10.3639	13.4649	27994	433	131	21	16.0305	3.20552	142|760|836|841|842|2194|2353|2475|3091|3458|3725|4318|4609|4792|5468|5578|5579|5925|6772|7124|7422	PARP1|CA2|CASP3|CASP8|CASP9|FASN|FOS|MTOR|HIF1A|IFNG|JUN|MMP9|MYC|NFKBIA|PPARG|PRKCA|PRKCB|RB1|STAT1|TNF|VEGFA	-12.782	0	30	0	0	-18.3881	31.6585
GO Biological Processes	GO:0031960	response to corticosteroid	19	-14.7398	M1	1	0	19_GO:0050896 response to stimulus	-14.7398	19.5452	16.3322	27994	164	131	15	11.4504	2.78207	142|595|596|836|842|1026|1244|1277|1956|2353|2908|2950|3383|5743|7124	PARP1|CCND1|BCL2|CASP3|CASP9|CDKN1A|ABCC2|COL1A1|EGFR|FOS|NR3C1|GSTP1|ICAM1|PTGS2|TNF	-12.6346	0	12	0	0	-25.8818	34.4669
GO Biological Processes	GO:0070201	regulation of establishment of protein localization	19	-14.7066	M1	1	0	19_GO:0051179 localization	-14.7066	7.68686	12.2402	27994	695	131	25	19.084	3.43333	152|240|596|841|959|983|1509|1803|1869|1956|2064|2697|2932|3091|3458|3552|3553|5467|5530|5578|5594|5599|5743|7124|7157	ADRA2C|ALOX5|BCL2|CASP8|CD40LG|CDK1|CTSD|DPP4|E2F1|EGFR|ERBB2|GJA1|GSK3B|HIF1A|IFNG|IL1A|IL1B|PPARD|PPP3CA|PRKCA|MAPK1|MAPK8|PTGS2|TNF|TP53	-12.6049	0	40	1	1	-14.7066	12.987
GO Biological Processes	GO:0046649	lymphocyte activation	19	-14.69	M1	1	0	19_GO:0002376 immune system process	-14.69	7.24389	12.0226	27994	767	131	26	19.8473	3.48477	196|207|581|596|836|841|857|860|959|1026|1803|2064|2475|3383|3458|3481|3552|3553|3559|3572|5530|5579|6347|6647|7157|7412	AHR|AKT1|BAX|BCL2|CASP3|CASP8|CAV1|RUNX2|CD40LG|CDKN1A|DPP4|ERBB2|MTOR|ICAM1|IFNG|IGF2|IL1A|IL1B|IL2RA|IL6ST|PPP3CA|PRKCB|CCL2|SOD1|TP53|VCAM1	-12.5917	0	20	0	0	-20.2541	16.3681
GO Biological Processes	GO:0098754	detoxification	19	-14.6448	M1	1	0	19_GO:0098754 detoxification	-14.6448	22.4942	17.0371	27994	133	131	14	10.687	2.69929	847|1244|1728|2944|2946|2950|4353|4780|5742|5743|6647|7124|9429|50506	CAT|ABCC2|NQO1|GSTM1|GSTM2|GSTP1|MPO|NFE2L2|PTGS1|PTGS2|SOD1|TNF|ABCG2|DUOX2	-12.55	0	41	1	1	-14.6448	41.0951
GO Biological Processes	GO:1901342	regulation of vasculature development	19	-14.636	M1	1	0	19_GO:0032502 developmental process	-14.636	10.0619	13.2278	27994	446	131	21	16.0305	3.20552	240|1545|2064|2152|3091|3099|3162|3315|3552|3553|3576|3627|4780|5054|5468|5578|5579|5743|6772|7124|7422	ALOX5|CYP1B1|ERBB2|F3|HIF1A|HK2|HMOX1|HSPB1|IL1A|IL1B|CXCL8|CXCL10|NFE2L2|SERPINE1|PPARG|PRKCA|PRKCB|PTGS2|STAT1|TNF|VEGFA	-12.5446	0	13	0	0	-25.4494	21.3695
GO Biological Processes	GO:0001935	endothelial cell proliferation	19	-14.5349	M1	1	0	19_GO:0008283 cell proliferation	-14.5349	16.5175	15.365	27994	207	131	16	12.2137	2.8609	207|240|857|2152|2475|2697|3091|3162|3481|3725|5468|5578|6347|6772|7124|7422	AKT1|ALOX5|CAV1|F3|MTOR|GJA1|HIF1A|HMOX1|IGF2|JUN|PPARG|PRKCA|CCL2|STAT1|TNF|VEGFA	-12.4468	0	13	0	0	-25.4494	21.3695
GO Biological Processes	GO:2000379	positive regulation of reactive oxygen species metabolic process	19	-14.5101	M1	1	0	19_GO:0048518 positive regulation of biological process	-14.5101	26.2078	17.829	27994	106	131	13	9.92366	2.6122	207|1026|1956|2475|2950|3383|3458|3553|4780|5743|6647|7124|7157	AKT1|CDKN1A|EGFR|MTOR|GSTP1|ICAM1|IFNG|IL1B|NFE2L2|PTGS2|SOD1|TNF|TP53	-12.4254	0	11	0	0	-26.7386	213.695
GO Biological Processes	GO:0097237	cellular response to toxic substance	19	-14.4943	M1	1	0	19_GO:0050896 response to stimulus	-14.4943	14.5312	14.7357	27994	250	131	17	12.9771	2.93609	847|983|1545|1728|2944|2946|2950|3162|4353|4780|5742|5743|5970|6647|7124|9429|50506	CAT|CDK1|CYP1B1|NQO1|GSTM1|GSTM2|GSTP1|HMOX1|MPO|NFE2L2|PTGS1|PTGS2|RELA|SOD1|TNF|ABCG2|DUOX2	-12.413	0	41	0	0	-14.6448	41.0951
GO Biological Processes	GO:0031669	cellular response to nutrient levels	19	-14.4656	M1	1	0	19_GO:0050896 response to stimulus	-14.4656	14.4733	14.7022	27994	251	131	17	12.9771	2.93609	596|1026|1277|2475|3162|3309|3383|3725|4780|5465|5468|5594|5599|5743|6647|7157|8648	BCL2|CDKN1A|COL1A1|MTOR|HMOX1|HSPA5|ICAM1|JUN|NFE2L2|PPARA|PPARG|MAPK1|MAPK8|PTGS2|SOD1|TP53|NCOA1	-12.3875	0	17	0	0	-21.7	15.1556
GO Biological Processes	GO:0050900	leukocyte migration	19	-14.4051	M1	1	0	19_GO:0040011 locomotion	-14.4051	9.07583	12.721	27994	518	131	22	16.7939	3.26601	207|240|857|1277|1800|1803|2155|3162|3383|3553|3576|3627|4312|5054|5594|6347|6373|6401|7056|7124|7412|7422	AKT1|ALOX5|CAV1|COL1A1|DPEP1|DPP4|F7|HMOX1|ICAM1|IL1B|CXCL8|CXCL10|MMP1|SERPINE1|MAPK1|CCL2|CXCL11|SELE|THBD|TNF|VCAM1|VEGFA	-12.3303	0	42	1	1	-14.4051	14.5229
GO Biological Processes	GO:1901653	cellular response to peptide	19	-14.398	M1	1	0	19_GO:0050896 response to stimulus	-14.398	10.6316	13.3372	27994	402	131	20	15.2672	3.14246	142|154|207|231|760|857|2697|2932|2950|3383|3481|3553|3645|4780|5468|5579|5970|6772|7157|7412	PARP1|ADRB2|AKT1|AKR1B1|CA2|CAV1|GJA1|GSK3B|GSTP1|ICAM1|IGF2|IL1B|INSRR|NFE2L2|PPARG|PRKCB|RELA|STAT1|TP53|VCAM1	-12.3265	0	6	0	0	-32.439	12.8345
GO Biological Processes	GO:0003018	vascular process in circulatory system	19	-14.317	M1	1	0	19_GO:0032501 multicellular organismal process	-14.317	18.3167	15.7565	27994	175	131	15	11.4504	2.78207	152|153|154|207|857|1812|1956|2697|3162|3383|5467|5743|6532|6647|7422	ADRA2C|ADRB1|ADRB2|AKT1|CAV1|DRD1|EGFR|GJA1|HMOX1|ICAM1|PPARD|PTGS2|SLC6A4|SOD1|VEGFA	-12.2487	0	36	0	0	-16.0134	50.2811
GO Biological Processes	GO:0048638	regulation of developmental growth	19	-14.3056	M1	1	0	19_GO:0040007 growth	-14.3056	11.502	13.6153	27994	353	131	19	14.5038	3.07666	153|154|207|367|596|891|983|1026|2475|2697|2932|3481|5465|5467|5594|6532|6647|6696|7422	ADRB1|ADRB2|AKT1|AR|BCL2|CCNB1|CDK1|CDKN1A|MTOR|GJA1|GSK3B|IGF2|PPARA|PPARD|MAPK1|SLC6A4|SOD1|SPP1|VEGFA	-12.2405	0	26	0	0	-18.934	11.7784
GO Biological Processes	GO:0030879	mammary gland development	19	-14.2419	M1	1	0	19_GO:0032502 developmental process	-14.2419	21.0685	16.4391	27994	142	131	14	10.687	2.69929	207|367|581|595|857|1950|2099|2194|3091|3099|5241|5594|7422|8648	AKT1|AR|BAX|CCND1|CAV1|EGF|ESR1|FASN|HIF1A|HK2|PGR|MAPK1|VEGFA|NCOA1	-12.1799	0	31	0	0	-18.0915	106.847
GO Biological Processes	GO:0035296	regulation of tube diameter	19	-14.1988	M1	1	0	19_GO:0065007 biological regulation	-14.1988	20.9212	16.376	27994	143	131	14	10.687	2.69929	152|153|154|207|857|1812|1956|2697|3162|3383|5467|5743|6532|6647	ADRA2C|ADRB1|ADRB2|AKT1|CAV1|DRD1|EGFR|GJA1|HMOX1|ICAM1|PPARD|PTGS2|SLC6A4|SOD1	-12.1463	0	36	0	0	-16.0134	50.2811
GO Biological Processes	GO:0050880	regulation of blood vessel size	19	-14.1988	M1	1	0	19_GO:0032501 multicellular organismal process	-14.1988	20.9212	16.376	27994	143	131	14	10.687	2.69929	152|153|154|207|857|1812|1956|2697|3162|3383|5467|5743|6532|6647	ADRA2C|ADRB1|ADRB2|AKT1|CAV1|DRD1|EGFR|GJA1|HMOX1|ICAM1|PPARD|PTGS2|SLC6A4|SOD1	-12.1463	0	36	0	0	-16.0134	50.2811
GO Biological Processes	GO:0097746	regulation of blood vessel diameter	19	-14.1988	M1	1	0	19_GO:0032501 multicellular organismal process	-14.1988	20.9212	16.376	27994	143	131	14	10.687	2.69929	152|153|154|207|857|1812|1956|2697|3162|3383|5467|5743|6532|6647	ADRA2C|ADRB1|ADRB2|AKT1|CAV1|DRD1|EGFR|GJA1|HMOX1|ICAM1|PPARD|PTGS2|SLC6A4|SOD1	-12.1463	0	36	0	0	-16.0134	50.2811
GO Biological Processes	GO:0007623	circadian rhythm	19	-14.1803	M1	1	0	19_GO:0048511 rhythmic process	-14.1803	15.684	14.924	27994	218	131	16	12.2137	2.8609	153|196|983|1956|2155|2475|2932|3725|5054|5465|5468|5599|6532|7150|7157|10499	ADRB1|AHR|CDK1|EGFR|F7|MTOR|GSK3B|JUN|SERPINE1|PPARA|PPARG|MAPK8|SLC6A4|TOP1|TP53|NCOA2	-12.1309	0	23	0	0	-19.2265	15.684
GO Biological Processes	GO:0035150	regulation of tube size	19	-14.1561	M1	1	0	19_GO:0065007 biological regulation	-14.1561	20.7759	16.3136	27994	144	131	14	10.687	2.69929	152|153|154|207|857|1812|1956|2697|3162|3383|5467|5743|6532|6647	ADRA2C|ADRB1|ADRB2|AKT1|CAV1|DRD1|EGFR|GJA1|HMOX1|ICAM1|PPARD|PTGS2|SLC6A4|SOD1	-12.1097	0	36	0	0	-16.0134	50.2811
GO Biological Processes	GO:0010212	response to ionizing radiation	19	-14.1137	M1	1	0	19_GO:0050896 response to stimulus	-14.1137	20.6326	16.2519	27994	145	131	14	10.687	2.69929	142|581|595|596|598|836|1026|2002|3309|3383|3627|4609|7056|7157	PARP1|BAX|CCND1|BCL2|BCL2L1|CASP3|CDKN1A|ELK1|HSPA5|ICAM1|CXCL10|MYC|THBD|TP53	-12.0704	0	19	0	0	-20.3862	38.1598
GO Biological Processes	GO:0043200	response to amino acid	19	-14.0887	M1	1	0	19_GO:0050896 response to stimulus	-14.0887	24.3687	17.143	27994	114	131	13	9.92366	2.6122	598|836|1147|1277|1281|1956|2155|2475|2950|3383|4313|5970|7124	BCL2L1|CASP3|CHUK|COL1A1|COL3A1|EGFR|F7|MTOR|GSTP1|ICAM1|MMP2|RELA|TNF	-12.0514	0	14	0	0	-24.5508	24.3687
GO Biological Processes	GO:1990748	cellular detoxification	19	-14.0887	M1	1	0	19_GO:0098754 detoxification	-14.0887	24.3687	17.143	27994	114	131	13	9.92366	2.6122	847|1728|2944|2946|2950|4353|4780|5742|5743|6647|7124|9429|50506	CAT|NQO1|GSTM1|GSTM2|GSTP1|MPO|NFE2L2|PTGS1|PTGS2|SOD1|TNF|ABCG2|DUOX2	-12.0514	0	41	0	0	-14.6448	41.0951
GO Biological Processes	GO:0051186	cofactor metabolic process	19	-14.0637	M1	1	0	19_GO:0008152 metabolic process	-14.0637	8.15087	12.172	27994	603	131	23	17.5573	3.32406	231|847|1543|1544|1800|1956|2194|2944|2946|2950|3091|3099|3162|3458|4314|4353|4780|5465|5644|5743|6647|7157|50506	AKR1B1|CAT|CYP1A1|CYP1A2|DPEP1|EGFR|FASN|GSTM1|GSTM2|GSTP1|HIF1A|HK2|HMOX1|IFNG|MMP3|MPO|NFE2L2|PPARA|PRSS1|PTGS2|SOD1|TP53|DUOX2	-12.0294	0	43	1	1	-14.0637	50.2811
GO Biological Processes	GO:0060135	maternal process involved in female pregnancy	19	-14.0336	M1	1	0	19_GO:0022414 reproductive process	-14.0336	36.7288	19.6209	27994	64	131	11	8.39695	2.42315	207|231|367|2099|2475|2697|5241|5467|5594|5743|6696	AKT1|AKR1B1|AR|ESR1|MTOR|GJA1|PGR|PPARD|MAPK1|PTGS2|SPP1	-12.0023	0	16	0	0	-23.5716	42.7389
GO Biological Processes	GO:0010631	epithelial cell migration	19	-14.0211	M1	1	0	19_GO:0040011 locomotion	-14.0211	11.0934	13.3276	27994	366	131	19	14.5038	3.07666	207|1545|1803|2475|3037|3091|3162|3315|3458|3725|4318|4780|5467|5468|5578|5743|6772|7124|7422	AKT1|CYP1B1|DPP4|MTOR|HAS2|HIF1A|HMOX1|HSPB1|IFNG|JUN|MMP9|NFE2L2|PPARD|PPARG|PRKCA|PTGS2|STAT1|TNF|VEGFA	-11.9927	0	13	0	0	-25.4494	21.3695
GO Biological Processes	GO:0090132	epithelium migration	19	-13.9571	M1	1	0	19_GO:0032501 multicellular organismal process	-13.9571	11.0032	13.2632	27994	369	131	19	14.5038	3.07666	207|1545|1803|2475|3037|3091|3162|3315|3458|3725|4318|4780|5467|5468|5578|5743|6772|7124|7422	AKT1|CYP1B1|DPP4|MTOR|HAS2|HIF1A|HMOX1|HSPB1|IFNG|JUN|MMP9|NFE2L2|PPARD|PPARG|PRKCA|PTGS2|STAT1|TNF|VEGFA	-11.9316	0	13	0	0	-25.4494	21.3695
GO Biological Processes	GO:0051091	positive regulation of DNA-binding transcription factor activity	19	-13.9415	M1	1	0	19_GO:0048518 positive regulation of biological process	-13.9415	13.4548	14.1006	27994	270	131	17	12.9771	2.93609	207|367|847|857|959|1147|2099|2100|3383|3551|3553|5468|5530|5579|5970|7124|7422	AKT1|AR|CAT|CAV1|CD40LG|CHUK|ESR1|ESR2|ICAM1|IKBKB|IL1B|PPARG|PPP3CA|PRKCB|RELA|TNF|VEGFA	-11.919	0	24	0	0	-19.0213	42.7389
GO Biological Processes	GO:0014074	response to purine-containing compound	19	-13.9064	M1	1	0	19_GO:0050896 response to stimulus	-13.9064	19.9448	15.9521	27994	150	131	14	10.687	2.69929	196|1277|2353|2946|3309|3553|5468|5743|5970|6532|6647|6772|7056|50506	AHR|COL1A1|FOS|GSTM2|HSPA5|IL1B|PPARG|PTGS2|RELA|SLC6A4|SOD1|STAT1|THBD|DUOX2	-11.8867	0	44	1	1	-13.9064	19.9448
GO Biological Processes	GO:0043408	regulation of MAPK cascade	19	-13.8505	M1	1	0	19_GO:0023052 signaling	-13.8505	7.04798	11.575	27994	758	131	25	19.084	3.43333	152|154|207|367|857|959|983|1950|1956|2064|2950|3383|3481|3486|3553|3725|4609|5578|5594|5894|6347|6647|7124|7422|653361	ADRA2C|ADRB2|AKT1|AR|CAV1|CD40LG|CDK1|EGF|EGFR|ERBB2|GSTP1|ICAM1|IGF2|IGFBP3|IL1B|JUN|MYC|PRKCA|MAPK1|RAF1|CCL2|SOD1|TNF|VEGFA|NCF1	-11.8337	0	35	0	0	-16.3031	20.6801
GO Biological Processes	GO:0090130	tissue migration	19	-13.8306	M1	1	0	19_GO:0032501 multicellular organismal process	-13.8306	10.8272	13.1367	27994	375	131	19	14.5038	3.07666	207|1545|1803|2475|3037|3091|3162|3315|3458|3725|4318|4780|5467|5468|5578|5743|6772|7124|7422	AKT1|CYP1B1|DPP4|MTOR|HAS2|HIF1A|HMOX1|HSPB1|IFNG|JUN|MMP9|NFE2L2|PPARD|PPARG|PRKCA|PTGS2|STAT1|TNF|VEGFA	-11.8167	0	13	0	0	-25.4494	21.3695
GO Biological Processes	GO:0048871	multicellular organismal homeostasis	19	-13.7627	M1	1	0	19_GO:0032501 multicellular organismal process	-13.7627	9.08419	12.4302	27994	494	131	21	16.0305	3.20552	153|154|231|581|596|760|857|1812|1956|2697|3037|3315|3552|3553|5578|5743|5925|6647|6696|7124|7422	ADRB1|ADRB2|AKR1B1|BAX|BCL2|CA2|CAV1|DRD1|EGFR|GJA1|HAS2|HSPB1|IL1A|IL1B|PRKCA|PTGS2|RB1|SOD1|SPP1|TNF|VEGFA	-11.7515	0	45	1	1	-13.7627	44.9883
GO Biological Processes	GO:0006690	icosanoid metabolic process	19	-13.6985	M1	1	0	19_GO:0008152 metabolic process	-13.6985	22.7707	16.524	27994	122	131	13	9.92366	2.6122	240|1543|1544|1545|1800|2944|2950|3553|4048|5321|5444|5742|5743	ALOX5|CYP1A1|CYP1A2|CYP1B1|DPEP1|GSTM1|GSTP1|IL1B|LTA4H|PLA2G4A|PON1|PTGS1|PTGS2	-11.6901	0	32	0	0	-17.2246	56.5662
GO Biological Processes	GO:0071453	cellular response to oxygen levels	19	-13.6692	M1	1	0	19_GO:0050896 response to stimulus	-13.6692	14.5494	14.3021	27994	235	131	16	12.2137	2.8609	207|596|857|891|1869|2475|3091|3162|3383|4609|4780|5467|5468|5743|7157|7422	AKT1|BCL2|CAV1|CCNB1|E2F1|MTOR|HIF1A|HMOX1|ICAM1|MYC|NFE2L2|PPARD|PPARG|PTGS2|TP53|VEGFA	-11.6664	0	9	0	0	-26.9935	25.1405
GO Biological Processes	GO:0097305	response to alcohol	19	-13.6692	M1	1	0	19_GO:0050896 response to stimulus	-13.6692	14.5494	14.3021	27994	235	131	16	12.2137	2.8609	142|196|207|595|598|841|847|983|1026|1728|2155|2353|2950|3383|5468|6647	PARP1|AHR|AKT1|CCND1|BCL2L1|CASP8|CAT|CDK1|CDKN1A|NQO1|F7|FOS|GSTP1|ICAM1|PPARG|SOD1	-11.6664	0	2	0	0	-36.5824	19.0276
GO Biological Processes	GO:0006805	xenobiotic metabolic process	19	-13.5137	M1	1	0	19_GO:0050896 response to stimulus	-13.5137	22.0479	16.2363	27994	126	131	13	9.92366	2.6122	196|1244|1543|1544|1545|1576|1728|1800|2944|2946|2950|5742|8856	AHR|ABCC2|CYP1A1|CYP1A2|CYP1B1|CYP3A4|NQO1|DPEP1|GSTM1|GSTM2|GSTP1|PTGS1|NR1I2	-11.5163	0	10	0	0	-26.8626	22.432
GO Biological Processes	GO:0062013	positive regulation of small molecule metabolic process	19	-13.5135	M1	1	0	19_GO:0048518 positive regulation of biological process	-13.5135	18.6983	15.3939	27994	160	131	14	10.687	2.69929	207|891|983|1950|3037|3091|3458|3481|3553|5465|5467|5468|5743|7124	AKT1|CCNB1|CDK1|EGF|HAS2|HIF1A|IFNG|IGF2|IL1B|PPARA|PPARD|PPARG|PTGS2|TNF	-11.5163	0	29	0	0	-18.4437	33.7413
GO Biological Processes	GO:1901655	cellular response to ketone	19	-13.4743	M1	1	0	19_GO:0050896 response to stimulus	-13.4743	26.4365	17.2072	27994	97	131	12	9.16031	2.52033	196|207|231|367|842|1244|1956|2002|2908|3383|5468|6696	AHR|AKT1|AKR1B1|AR|CASP9|ABCC2|EGFR|ELK1|NR3C1|ICAM1|PPARG|SPP1	-11.4797	0	12	0	0	-25.8818	34.4669
GO Biological Processes	GO:0042759	long-chain fatty acid biosynthetic process	19	-13.4125	M1	1	0	19_GO:0008152 metabolic process	-13.4125	56.5662	22.2294	27994	34	131	9	6.87023	2.21001	240|1543|1544|1576|2944|2946|2950|4048|5743	ALOX5|CYP1A1|CYP1A2|CYP3A4|GSTM1|GSTM2|GSTP1|LTA4H|PTGS2	-11.4207	0	32	0	0	-17.2246	56.5662
GO Biological Processes	GO:0051402	neuron apoptotic process	19	-13.387	M1	1	0	19_GO:0009987 cellular process	-13.387	13.9556	13.9657	27994	245	131	16	12.2137	2.8609	142|581|596|598|836|842|1728|3091|3162|3309|3725|5925|6347|6647|7124|7157	PARP1|BAX|BCL2|BCL2L1|CASP3|CASP9|NQO1|HIF1A|HMOX1|HSPA5|JUN|RB1|CCL2|SOD1|TNF|TP53	-11.3979	0	15	0	0	-24.5132	30.8425
GO Biological Processes	GO:0032102	negative regulation of response to external stimulus	19	-13.366	M1	1	0	19_GO:0048519 negative regulation of biological process	-13.366	10.2015	12.6772	27994	398	131	19	14.5038	3.07666	240|1026|1803|1812|2697|2950|3559|5054|5327|5328|5465|5467|5468|5925|6347|6647|6696|7056|7124	ALOX5|CDKN1A|DPP4|DRD1|GJA1|GSTP1|IL2RA|SERPINE1|PLAT|PLAU|PPARA|PPARD|PPARG|RB1|CCL2|SOD1|SPP1|THBD|TNF	-11.3796	0	46	1	1	-13.366	32.8761
GO Biological Processes	GO:0007596	blood coagulation	19	-13.355	M1	1	0	19_GO:0032501 multicellular organismal process	-13.355	11.1817	13.0286	27994	344	131	18	13.7405	3.00794	152|857|959|1277|1281|2152|2155|3315|4780|5054|5321|5327|5328|5578|5579|5594|5894|7056	ADRA2C|CAV1|CD40LG|COL1A1|COL3A1|F3|F7|HSPB1|NFE2L2|SERPINE1|PLA2G4A|PLAT|PLAU|PRKCA|PRKCB|MAPK1|RAF1|THBD	-11.3712	0	3	0	0	-33.9492	45.7917
GO Biological Processes	GO:1902893	regulation of pri-miRNA transcription by RNA polymerase II	19	-13.3228	M1	1	0	19_GO:0050789 regulation of biological process	-13.3228	41.0951	19.8432	27994	52	131	10	7.63359	2.31999	2353|2908|3091|3725|5465|5467|5468|5970|7124|7157	FOS|NR3C1|HIF1A|JUN|PPARA|PPARD|PPARG|RELA|TNF|TP53	-11.3416	0	47	1	1	-13.3228	45.7917
GO Biological Processes	GO:0007599	hemostasis	19	-13.2477	M1	1	0	19_GO:0065007 biological regulation	-13.2477	11.0215	12.9177	27994	349	131	18	13.7405	3.00794	152|857|959|1277|1281|2152|2155|3315|4780|5054|5321|5327|5328|5578|5579|5594|5894|7056	ADRA2C|CAV1|CD40LG|COL1A1|COL3A1|F3|F7|HSPB1|NFE2L2|SERPINE1|PLA2G4A|PLAT|PLAU|PRKCA|PRKCB|MAPK1|RAF1|THBD	-11.2692	0	3	0	0	-33.9492	45.7917
GO Biological Processes	GO:0061614	pri-miRNA transcription by RNA polymerase II	19	-13.2337	M1	1	0	19_GO:0008152 metabolic process	-13.2337	40.3197	19.646	27994	53	131	10	7.63359	2.31999	2353|2908|3091|3725|5465|5467|5468|5970|7124|7157	FOS|NR3C1|HIF1A|JUN|PPARA|PPARD|PPARG|RELA|TNF|TP53	-11.2578	0	47	0	0	-13.3228	45.7917
GO Biological Processes	GO:0050817	coagulation	19	-13.2265	M1	1	0	19_GO:0032501 multicellular organismal process	-13.2265	10.99	12.8957	27994	350	131	18	13.7405	3.00794	152|857|959|1277|1281|2152|2155|3315|4780|5054|5321|5327|5328|5578|5579|5594|5894|7056	ADRA2C|CAV1|CD40LG|COL1A1|COL3A1|F3|F7|HSPB1|NFE2L2|SERPINE1|PLA2G4A|PLAT|PLAU|PRKCA|PRKCB|MAPK1|RAF1|THBD	-11.2531	0	3	0	0	-33.9492	45.7917
GO Biological Processes	GO:0045766	positive regulation of angiogenesis	19	-13.204	M1	1	0	19_GO:0048518 positive regulation of biological process	-13.204	15.4107	14.3037	27994	208	131	15	11.4504	2.78207	1545|2152|3091|3099|3162|3315|3552|3553|3576|4780|5054|5578|5579|5743|7422	CYP1B1|F3|HIF1A|HK2|HMOX1|HSPB1|IL1A|IL1B|CXCL8|NFE2L2|SERPINE1|PRKCA|PRKCB|PTGS2|VEGFA	-11.2333	0	13	0	0	-25.4494	21.3695
GO Biological Processes	GO:0072330	monocarboxylic acid biosynthetic process	19	-13.1631	M1	1	0	19_GO:0008152 metabolic process	-13.1631	10.8966	12.8305	27994	353	131	18	13.7405	3.00794	240|1543|1544|1576|2194|2944|2946|2950|3091|3099|3458|3553|4048|5321|5465|5742|5743|7157	ALOX5|CYP1A1|CYP1A2|CYP3A4|FASN|GSTM1|GSTM2|GSTP1|HIF1A|HK2|IFNG|IL1B|LTA4H|PLA2G4A|PPARA|PTGS1|PTGS2|TP53	-11.1949	0	32	0	0	-17.2246	56.5662
GO Biological Processes	GO:0048661	positive regulation of smooth muscle cell proliferation	19	-13.1531	M1	1	0	19_GO:0008283 cell proliferation	-13.1531	24.8965	16.6597	27994	103	131	12	9.16031	2.52033	207|231|1956|2475|2697|3162|3725|4313|4318|5743|6772|7124	AKT1|AKR1B1|EGFR|MTOR|GJA1|HMOX1|JUN|MMP2|MMP9|PTGS2|STAT1|TNF	-11.1874	0	21	0	0	-19.9812	24.8965
GO Biological Processes	GO:0051100	negative regulation of binding	19	-13.1466	M1	1	0	19_GO:0065007 biological regulation	-13.1466	17.5984	14.8842	27994	170	131	14	10.687	2.69929	154|207|581|857|1026|1869|2932|3162|3725|4792|5465|5530|5599|6590	ADRB2|AKT1|BAX|CAV1|CDKN1A|E2F1|GSK3B|HMOX1|JUN|NFKBIA|PPARA|PPP3CA|MAPK8|SLPI	-11.1834	0	34	0	0	-16.3055	17.9743
GO Biological Processes	GO:0002573	myeloid leukocyte differentiation	19	-13.1126	M1	1	0	19_GO:0002376 immune system process	-13.1126	15.1916	14.1882	27994	211	131	15	11.4504	2.78207	142|760|841|2194|2353|2475|3458|3725|4318|4609|5468|5578|5925|7124|7422	PARP1|CA2|CASP8|FASN|FOS|MTOR|IFNG|JUN|MMP9|MYC|PPARG|PRKCA|RB1|TNF|VEGFA	-11.1545	0	30	0	0	-18.3881	31.6585
GO Biological Processes	GO:0050679	positive regulation of epithelial cell proliferation	19	-13.1126	M1	1	0	19_GO:0008283 cell proliferation	-13.1126	15.1916	14.1882	27994	211	131	15	11.4504	2.78207	207|367|595|1956|2064|2152|2475|3037|3091|3162|3481|3725|4609|5578|7422	AKT1|AR|CCND1|EGFR|ERBB2|F3|MTOR|HAS2|HIF1A|HMOX1|IGF2|JUN|MYC|PRKCA|VEGFA	-11.1545	0	13	0	0	-25.4494	21.3695
GO Biological Processes	GO:0042063	gliogenesis	19	-13.0283	M1	1	0	19_GO:0032502 developmental process	-13.0283	11.8333	13.0869	27994	307	131	17	12.9771	2.93609	207|983|1812|1869|1956|2064|2475|2950|3458|3553|3572|5468|5594|5970|6347|6647|7124	AKT1|CDK1|DRD1|E2F1|EGFR|ERBB2|MTOR|GSTP1|IFNG|IL1B|IL6ST|PPARG|MAPK1|RELA|CCL2|SOD1|TNF	-11.0726	0	48	1	1	-13.0283	19.4268
GO Biological Processes	GO:0046394	carboxylic acid biosynthetic process	19	-13.0205	M1	1	0	19_GO:0008152 metabolic process	-13.0205	8.97877	12.0386	27994	476	131	20	15.2672	3.14246	240|1543|1544|1576|1950|2194|2944|2946|2950|3037|3091|3099|3458|3553|4048|5321|5465|5742|5743|7157	ALOX5|CYP1A1|CYP1A2|CYP3A4|EGF|FASN|GSTM1|GSTM2|GSTP1|HAS2|HIF1A|HK2|IFNG|IL1B|LTA4H|PLA2G4A|PPARA|PTGS1|PTGS2|TP53	-11.0673	0	32	0	0	-17.2246	56.5662
GO Biological Processes	GO:0050727	regulation of inflammatory response	19	-13.0106	M1	1	0	19_GO:0050896 response to stimulus	-13.0106	8.31035	11.7619	27994	540	131	21	16.0305	3.20552	240|1956|2099|2950|3458|3553|3559|3572|4314|4318|4792|5054|5465|5467|5468|5743|5925|5970|6401|6647|7124	ALOX5|EGFR|ESR1|GSTP1|IFNG|IL1B|IL2RA|IL6ST|MMP3|MMP9|NFKBIA|SERPINE1|PPARA|PPARD|PPARG|PTGS2|RB1|RELA|SELE|SOD1|TNF	-11.0599	0	49	1	1	-13.0106	8.72223
GO Biological Processes	GO:0016053	organic acid biosynthetic process	19	-13.0035	M1	1	0	19_GO:0008152 metabolic process	-13.0035	8.95994	12.0231	27994	477	131	20	15.2672	3.14246	240|1543|1544|1576|1950|2194|2944|2946|2950|3037|3091|3099|3458|3553|4048|5321|5465|5742|5743|7157	ALOX5|CYP1A1|CYP1A2|CYP3A4|EGF|FASN|GSTM1|GSTM2|GSTP1|HAS2|HIF1A|HK2|IFNG|IL1B|LTA4H|PLA2G4A|PPARA|PTGS1|PTGS2|TP53	-11.0553	0	32	0	0	-17.2246	56.5662
GO Biological Processes	GO:0045860	positive regulation of protein kinase activity	19	-12.9951	M1	1	0	19_GO:0048518 positive regulation of biological process	-12.9951	8.29499	11.7483	27994	541	131	21	16.0305	3.20552	152|154|207|595|891|959|983|1026|1950|1956|2064|2475|3458|3481|3553|5594|5894|6647|7124|7422|653361	ADRA2C|ADRB2|AKT1|CCND1|CCNB1|CD40LG|CDK1|CDKN1A|EGF|EGFR|ERBB2|MTOR|IFNG|IGF2|IL1B|MAPK1|RAF1|SOD1|TNF|VEGFA|NCF1	-11.0493	0	35	0	0	-16.3031	20.6801
GO Biological Processes	GO:0010332	response to gamma radiation	19	-12.9773	M1	1	0	19_GO:0050896 response to stimulus	-12.9773	38.1598	19.086	27994	56	131	10	7.63359	2.31999	142|581|596|598|1026|2002|3309|3627|4609|7157	PARP1|BAX|BCL2|BCL2L1|CDKN1A|ELK1|HSPA5|CXCL10|MYC|TP53	-11.0339	0	19	0	0	-20.3862	38.1598
GO Biological Processes	GO:1901568	fatty acid derivative metabolic process	19	-12.9718	M1	1	0	19_GO:0008152 metabolic process	-12.9718	17.0956	14.6454	27994	175	131	14	10.687	2.69929	240|1543|1544|1545|1800|2194|2944|2950|3553|4048|5321|5444|5742|5743	ALOX5|CYP1A1|CYP1A2|CYP1B1|DPEP1|FASN|GSTM1|GSTP1|IL1B|LTA4H|PLA2G4A|PON1|PTGS1|PTGS2	-11.0309	0	32	0	0	-17.2246	56.5662
GO Biological Processes	GO:0001667	ameboidal-type cell migration	19	-12.9027	M1	1	0	19_GO:0040011 locomotion	-12.9027	8.84864	11.9306	27994	483	131	20	15.2672	3.14246	207|1545|1803|2475|2697|3037|3091|3162|3315|3458|3725|4318|4780|5467|5468|5578|5743|6772|7124|7422	AKT1|CYP1B1|DPP4|MTOR|GJA1|HAS2|HIF1A|HMOX1|HSPB1|IFNG|JUN|MMP9|NFE2L2|PPARD|PPARG|PRKCA|PTGS2|STAT1|TNF|VEGFA	-10.9642	0	13	0	0	-25.4494	21.3695
GO Biological Processes	GO:0033674	positive regulation of kinase activity	19	-12.8934	M1	1	0	19_GO:0048518 positive regulation of biological process	-12.8934	7.64436	11.4243	27994	615	131	22	16.7939	3.26601	152|154|207|595|891|959|983|1026|1950|1956|2064|2475|3458|3481|3553|3645|5594|5894|6647|7124|7422|653361	ADRA2C|ADRB2|AKT1|CCND1|CCNB1|CD40LG|CDK1|CDKN1A|EGF|EGFR|ERBB2|MTOR|IFNG|IGF2|IL1B|INSRR|MAPK1|RAF1|SOD1|TNF|VEGFA|NCF1	-10.9572	0	35	0	0	-16.3031	20.6801
GO Biological Processes	GO:0030522	intracellular receptor signaling pathway	19	-12.7834	M1	1	0	19_GO:0023052 signaling	-12.7834	12.7579	13.2617	27994	268	131	16	12.2137	2.8609	142|196|367|841|2099|2100|2908|4306|4792|5241|5465|5467|5468|5970|8648|8856	PARP1|AHR|AR|CASP8|ESR1|ESR2|NR3C1|NR3C2|NFKBIA|PGR|PPARA|PPARD|PPARG|RELA|NCOA1|NR1I2	-10.8496	0	5	0	0	-32.7337	19.2212
GO Biological Processes	GO:0043410	positive regulation of MAPK cascade	19	-12.7658	M1	1	0	19_GO:0048518 positive regulation of biological process	-12.7658	8.0712	11.5478	27994	556	131	21	16.0305	3.20552	152|154|367|959|983|1950|1956|2064|3383|3481|3486|3553|3725|5578|5594|5894|6347|6647|7124|7422|653361	ADRA2C|ADRB2|AR|CD40LG|CDK1|EGF|EGFR|ERBB2|ICAM1|IGF2|IGFBP3|IL1B|JUN|PRKCA|MAPK1|RAF1|CCL2|SOD1|TNF|VEGFA|NCF1	-10.8343	0	35	0	0	-16.3031	20.6801
GO Biological Processes	GO:0051347	positive regulation of transferase activity	19	-12.7584	M1	1	0	19_GO:0065007 biological regulation	-12.7584	7.06175	11.1041	27994	696	131	23	17.5573	3.32406	152|154|207|595|891|959|983|1026|1950|1956|2064|2475|3458|3481|3553|3645|4609|5594|5894|6647|7124|7422|653361	ADRA2C|ADRB2|AKT1|CCND1|CCNB1|CD40LG|CDK1|CDKN1A|EGF|EGFR|ERBB2|MTOR|IFNG|IGF2|IL1B|INSRR|MYC|MAPK1|RAF1|SOD1|TNF|VEGFA|NCF1	-10.8292	0	35	0	0	-16.3031	20.6801
GO Biological Processes	GO:0048145	regulation of fibroblast proliferation	19	-12.7295	M1	1	0	19_GO:0008283 cell proliferation	-12.7295	28.321	17.092	27994	83	131	11	8.39695	2.42315	581|891|1026|1869|1956|2099|2950|3725|4609|5468|7157	BAX|CCNB1|CDKN1A|E2F1|EGFR|ESR1|GSTP1|JUN|MYC|PPARG|TP53	-10.8027	0	50	1	1	-12.7295	29.3306
GO Biological Processes	GO:0042542	response to hydrogen peroxide	19	-12.6768	M1	1	0	19_GO:0050896 response to stimulus	-12.6768	19.0276	14.9749	27994	146	131	13	9.92366	2.6122	596|836|847|983|1277|1545|1728|3162|3725|4780|5970|6647|6772	BCL2|CASP3|CAT|CDK1|COL1A1|CYP1B1|NQO1|HMOX1|JUN|NFE2L2|RELA|SOD1|STAT1	-10.7534	0	2	0	0	-36.5824	19.0276
GO Biological Processes	GO:0002064	epithelial cell development	19	-12.6756	M1	1	0	19_GO:0032502 developmental process	-12.6756	14.1833	13.6443	27994	226	131	15	11.4504	2.78207	231|367|1026|2099|2194|2932|3091|3383|3551|3553|3572|5241|6647|7124|7422	AKR1B1|AR|CDKN1A|ESR1|FASN|GSK3B|HIF1A|ICAM1|IKBKB|IL1B|IL6ST|PGR|SOD1|TNF|VEGFA	-10.7534	0	51	1	1	-12.6756	53.4237
GO Biological Processes	GO:0048144	fibroblast proliferation	19	-12.6703	M1	1	0	19_GO:0008283 cell proliferation	-12.6703	27.9838	16.9828	27994	84	131	11	8.39695	2.42315	581|891|1026|1869|1956|2099|2950|3725|4609|5468|7157	BAX|CCNB1|CDKN1A|E2F1|EGFR|ESR1|GSTP1|JUN|MYC|PPARG|TP53	-10.7504	0	50	0	0	-12.7295	29.3306
GO Biological Processes	GO:0001676	long-chain fatty acid metabolic process	19	-12.6607	M1	1	0	19_GO:0008152 metabolic process	-12.6607	22.6932	15.8437	27994	113	131	12	9.16031	2.52033	240|1543|1544|1545|1576|2944|2946|2950|4048|5321|5742|5743	ALOX5|CYP1A1|CYP1A2|CYP1B1|CYP3A4|GSTM1|GSTM2|GSTP1|LTA4H|PLA2G4A|PTGS1|PTGS2	-10.7431	0	32	0	0	-17.2246	56.5662
GO Biological Processes	GO:0051384	response to glucocorticoid	19	-12.6383	M1	1	0	19_GO:0050896 response to stimulus	-12.6383	18.8982	14.9185	27994	147	131	13	9.92366	2.6122	595|596|836|842|1026|1244|1956|2353|2908|2950|3383|5743|7124	CCND1|BCL2|CASP3|CASP9|CDKN1A|ABCC2|EGFR|FOS|NR3C1|GSTP1|ICAM1|PTGS2|TNF	-10.725	0	12	0	0	-25.8818	34.4669
GO Biological Processes	GO:2000045	regulation of G1/S transition of mitotic cell cycle	19	-12.6381	M1	1	0	19_GO:0050789 regulation of biological process	-12.6381	16.1715	14.1961	27994	185	131	14	10.687	2.69929	207|581|595|596|891|983|1017|1026|1543|1869|1956|5925|6347|7157	AKT1|BAX|CCND1|BCL2|CCNB1|CDK1|CDK2|CDKN1A|CYP1A1|E2F1|EGFR|RB1|CCL2|TP53	-10.725	0	50	0	0	-12.7295	29.3306
GO Biological Processes	GO:1903706	regulation of hemopoiesis	19	-12.6246	M1	1	0	19_GO:0002376 immune system process	-12.6246	8.54779	11.677	27994	500	131	20	15.2672	3.14246	760|841|2064|2353|2475|3091|3458|3552|3553|3559|3725|4609|4780|4792|5578|5579|5925|6647|6772|7124	CA2|CASP8|ERBB2|FOS|MTOR|HIF1A|IFNG|IL1A|IL1B|IL2RA|JUN|MYC|NFE2L2|NFKBIA|PRKCA|PRKCB|RB1|SOD1|STAT1|TNF	-10.7137	0	30	0	0	-18.3881	31.6585
GO Biological Processes	GO:0051345	positive regulation of hydrolase activity	19	-12.6089	M1	1	0	19_GO:0065007 biological regulation	-12.6089	6.55003	10.8007	27994	783	131	24	18.3206	3.3798	153|207|581|841|842|857|1509|1956|2064|2099|2152|2475|2932|3383|3458|3725|4609|5468|5599|6347|6401|7124|7422|10598	ADRB1|AKT1|BAX|CASP8|CASP9|CAV1|CTSD|EGFR|ERBB2|ESR1|F3|MTOR|GSK3B|ICAM1|IFNG|JUN|MYC|PPARG|MAPK8|CCL2|SELE|TNF|VEGFA|AHSA1	-10.7003	0	52	1	1	-12.6089	14.2463
GO Biological Processes	GO:0010001	glial cell differentiation	19	-12.5645	M1	1	0	19_GO:0032502 developmental process	-12.5645	13.9366	13.508	27994	230	131	15	11.4504	2.78207	207|983|1812|1956|2064|2475|2950|3458|3553|3572|5468|5594|5970|6647|7124	AKT1|CDK1|DRD1|EGFR|ERBB2|MTOR|GSTP1|IFNG|IL1B|IL6ST|PPARG|MAPK1|RELA|SOD1|TNF	-10.6581	0	48	0	0	-13.0283	19.4268
GO Biological Processes	GO:0010638	positive regulation of organelle organization	19	-12.5473	M1	1	0	19_GO:0048518 positive regulation of biological process	-12.5473	7.34575	11.1355	27994	640	131	22	16.7939	3.26601	154|581|596|841|891|1869|1950|2475|2932|3091|3099|3383|3481|3552|3553|4318|5594|5599|5925|7124|7157|7422	ADRB2|BAX|BCL2|CASP8|CCNB1|E2F1|EGF|MTOR|GSK3B|HIF1A|HK2|ICAM1|IGF2|IL1A|IL1B|MMP9|MAPK1|MAPK8|RB1|TNF|TP53|VEGFA	-10.6432	0	53	1	1	-12.5473	42.7389
GO Biological Processes	GO:1904018	positive regulation of vasculature development	19	-12.4284	M1	1	0	19_GO:0048518 positive regulation of biological process	-12.4284	13.6401	13.3422	27994	235	131	15	11.4504	2.78207	1545|2152|3091|3099|3162|3315|3552|3553|3576|4780|5054|5578|5579|5743|7422	CYP1B1|F3|HIF1A|HK2|HMOX1|HSPB1|IL1A|IL1B|CXCL8|NFE2L2|SERPINE1|PRKCA|PRKCB|PTGS2|VEGFA	-10.5265	0	13	0	0	-25.4494	21.3695
GO Biological Processes	GO:0050865	regulation of cell activation	19	-12.3735	M1	1	0	19_GO:0050789 regulation of biological process	-12.3735	7.19951	10.9914	27994	653	131	22	16.7939	3.26601	196|207|596|836|857|959|1026|1803|2064|3162|3458|3481|3552|3553|3559|3572|5321|5578|6347|6647|7056|7412	AHR|AKT1|BCL2|CASP3|CAV1|CD40LG|CDKN1A|DPP4|ERBB2|HMOX1|IFNG|IGF2|IL1A|IL1B|IL2RA|IL6ST|PLA2G4A|PRKCA|CCL2|SOD1|THBD|VCAM1	-10.4737	0	20	0	0	-20.2541	16.3681
GO Biological Processes	GO:1903829	positive regulation of cellular protein localization	19	-12.352	M1	1	0	19_GO:0048518 positive regulation of biological process	-12.352	10.748	12.363	27994	338	131	17	12.9771	2.93609	142|207|596|841|983|1869|1950|1956|2064|2932|3458|3553|5594|5599|5743|7124|7157	PARP1|AKT1|BCL2|CASP8|CDK1|E2F1|EGF|EGFR|ERBB2|GSK3B|IFNG|IL1B|MAPK1|MAPK8|PTGS2|TNF|TP53	-10.4544	0	53	0	0	-12.5473	42.7389
GO Biological Processes	GO:0032103	positive regulation of response to external stimulus	19	-12.3313	M1	1	0	19_GO:0048518 positive regulation of biological process	-12.3313	10.7163	12.3412	27994	339	131	17	12.9771	2.93609	1956|2152|2155|3315|3458|3553|3572|3576|3627|4792|5054|5578|5594|5743|7056|7124|7422	EGFR|F3|F7|HSPB1|IFNG|IL1B|IL6ST|CXCL8|CXCL10|NFKBIA|SERPINE1|PRKCA|MAPK1|PTGS2|THBD|TNF|VEGFA	-10.4359	0	54	1	1	-12.3313	10.82
GO Biological Processes	GO:0000082	G1/S transition of mitotic cell cycle	19	-12.3262	M1	1	0	19_GO:0009987 cellular process	-12.3262	11.9133	12.7423	27994	287	131	16	12.2137	2.8609	207|581|595|596|891|983|1017|1026|1543|1869|1956|4609|5530|5925|6347|7157	AKT1|BAX|CCND1|BCL2|CCNB1|CDK1|CDK2|CDKN1A|CYP1A1|E2F1|EGFR|MYC|PPP3CA|RB1|CCL2|TP53	-10.4329	0	50	0	0	-12.7295	29.3306
GO Biological Processes	GO:0045787	positive regulation of cell cycle	19	-12.3156	M1	1	0	19_GO:0048518 positive regulation of biological process	-12.3156	9.71339	11.9741	27994	396	131	18	13.7405	3.00794	207|581|595|891|983|1017|1026|1543|1869|1950|1956|3481|3552|3553|5578|5925|6532|7157	AKT1|BAX|CCND1|CCNB1|CDK1|CDK2|CDKN1A|CYP1A1|E2F1|EGF|EGFR|IGF2|IL1A|IL1B|PRKCA|RB1|SLC6A4|TP53	-10.4245	0	50	0	0	-12.7295	29.3306
GO Biological Processes	GO:0043062	extracellular structure organization	19	-12.2825	M1	1	0	19_GO:0071840 cellular component organization or biogenesis	-12.2825	8.86506	11.6367	27994	458	131	19	14.5038	3.07666	857|1277|1281|1545|1803|3037|3383|4312|4313|4314|4318|4353|5054|5444|5644|5925|6696|7124|7412	CAV1|COL1A1|COL3A1|CYP1B1|DPP4|HAS2|ICAM1|MMP1|MMP2|MMP3|MMP9|MPO|SERPINE1|PON1|PRSS1|RB1|SPP1|TNF|VCAM1	-10.3934	0	55	1	1	-12.2825	22.7335
GO Biological Processes	GO:0001890	placenta development	19	-12.2682	M1	1	0	19_GO:0022414 reproductive process	-12.2682	17.6945	14.3833	27994	157	131	13	9.92366	2.6122	207|841|1956|2697|3091|3481|5467|5468|5594|5743|6647|6696|8648	AKT1|CASP8|EGFR|GJA1|HIF1A|IGF2|PPARD|PPARG|MAPK1|PTGS2|SOD1|SPP1|NCOA1	-10.3813	0	27	0	0	-18.6806	17.6945
GO Biological Processes	GO:1904951	positive regulation of establishment of protein localization	19	-12.1874	M1	1	0	19_GO:0048518 positive regulation of biological process	-12.1874	9.54467	11.8471	27994	403	131	18	13.7405	3.00794	596|841|983|1869|1956|2064|2697|2932|3091|3458|3552|3553|5467|5594|5599|5743|7124|7157	BCL2|CASP8|CDK1|E2F1|EGFR|ERBB2|GJA1|GSK3B|HIF1A|IFNG|IL1A|IL1B|PPARD|MAPK1|MAPK8|PTGS2|TNF|TP53	-10.3026	0	40	0	0	-14.7066	12.987
GO Biological Processes	GO:0048589	developmental growth	19	-12.152	M1	1	0	19_GO:0040007 growth	-12.152	7.01684	10.8089	27994	670	131	22	16.7939	3.26601	153|154|207|367|596|891|983|1026|2099|2475|2697|2932|3481|5465|5467|5530|5594|6532|6647|6696|7157|7422	ADRB1|ADRB2|AKT1|AR|BCL2|CCNB1|CDK1|CDKN1A|ESR1|MTOR|GJA1|GSK3B|IGF2|PPARA|PPARD|PPP3CA|MAPK1|SLC6A4|SOD1|SPP1|TP53|VEGFA	-10.2693	0	26	0	0	-18.934	11.7784
GO Biological Processes	GO:0071902	positive regulation of protein serine/threonine kinase activity	19	-12.1484	M1	1	0	19_GO:0048518 positive regulation of biological process	-12.1484	10.4391	12.1493	27994	348	131	17	12.9771	2.93609	154|207|595|891|959|983|1950|1956|2064|3458|3481|3553|5594|5894|6647|7124|7422	ADRB2|AKT1|CCND1|CCNB1|CD40LG|CDK1|EGF|EGFR|ERBB2|IFNG|IGF2|IL1B|MAPK1|RAF1|SOD1|TNF|VEGFA	-10.2678	0	35	0	0	-16.3031	20.6801
GO Biological Processes	GO:0031099	regeneration	19	-12.1432	M1	1	0	19_GO:0032502 developmental process	-12.1432	14.8842	13.5456	27994	201	131	14	10.687	2.69929	595|596|891|983|1026|1956|2155|2950|3162|3725|5467|5468|5530|6696	CCND1|BCL2|CCNB1|CDK1|CDKN1A|EGFR|F7|GSTP1|HMOX1|JUN|PPARD|PPARG|PPP3CA|SPP1	-10.2647	0	21	0	0	-19.9812	24.8965
GO Biological Processes	GO:0008637	apoptotic mitochondrial changes	19	-12.1292	M1	1	0	19_GO:0071840 cellular component organization or biogenesis	-12.1292	20.5147	14.9935	27994	125	131	12	9.16031	2.52033	207|581|596|598|841|1869|2932|3099|3725|4318|5599|7157	AKT1|BAX|BCL2|BCL2L1|CASP8|E2F1|GSK3B|HK2|JUN|MMP9|MAPK8|TP53	-10.2528	0	53	0	0	-12.5473	42.7389
GO Biological Processes	GO:0045936	negative regulation of phosphate metabolic process	19	-12.0768	M1	1	0	19_GO:0048519 negative regulation of biological process	-12.0768	7.42978	10.9538	27994	604	131	21	16.0305	3.20552	142|207|581|836|857|891|1026|2475|2932|2950|3315|3458|3486|3551|3553|3725|4609|5465|5925|7124|7157	PARP1|AKT1|BAX|CASP3|CAV1|CCNB1|CDKN1A|MTOR|GSK3B|GSTP1|HSPB1|IFNG|IGFBP3|IKBKB|IL1B|JUN|MYC|PPARA|RB1|TNF|TP53	-10.2024	0	56	1	1	-12.0768	11.5511
GO Biological Processes	GO:0010563	negative regulation of phosphorus metabolic process	19	-12.0631	M1	1	0	19_GO:0048519 negative regulation of biological process	-12.0631	7.4175	10.9421	27994	605	131	21	16.0305	3.20552	142|207|581|836|857|891|1026|2475|2932|2950|3315|3458|3486|3551|3553|3725|4609|5465|5925|7124|7157	PARP1|AKT1|BAX|CASP3|CAV1|CCNB1|CDKN1A|MTOR|GSK3B|GSTP1|HSPB1|IFNG|IGFBP3|IKBKB|IL1B|JUN|MYC|PPARA|RB1|TNF|TP53	-10.1908	0	56	0	0	-12.0768	11.5511
GO Biological Processes	GO:0001503	ossification	19	-12.0085	M1	1	0	19_GO:0032501 multicellular organismal process	-12.0085	9.31357	11.6709	27994	413	131	18	13.7405	3.00794	154|207|240|596|847|860|1277|1956|2194|3091|3481|3486|3572|4313|5594|5743|6696|7124	ADRB2|AKT1|ALOX5|BCL2|CAT|RUNX2|COL1A1|EGFR|FASN|HIF1A|IGF2|IGFBP3|IL6ST|MMP2|MAPK1|PTGS2|SPP1|TNF	-10.1382	0	57	1	1	-12.0085	9.31357
GO Biological Processes	GO:1902806	regulation of cell cycle G1/S phase transition	19	-11.9973	M1	1	0	19_GO:0050789 regulation of biological process	-11.9973	14.5229	13.3574	27994	206	131	14	10.687	2.69929	207|581|595|596|891|983|1017|1026|1543|1869|1956|5925|6347|7157	AKT1|BAX|CCND1|BCL2|CCNB1|CDK1|CDK2|CDKN1A|CYP1A1|E2F1|EGFR|RB1|CCL2|TP53	-10.1291	0	50	0	0	-12.7295	29.3306
GO Biological Processes	GO:0090068	positive regulation of cell cycle process	19	-11.9883	M1	1	0	19_GO:0048518 positive regulation of biological process	-11.9883	11.3216	12.3657	27994	302	131	16	12.2137	2.8609	207|581|595|891|983|1017|1026|1543|1869|1950|1956|3481|3552|3553|5925|7157	AKT1|BAX|CCND1|CCNB1|CDK1|CDK2|CDKN1A|CYP1A1|E2F1|EGF|EGFR|IGF2|IL1A|IL1B|RB1|TP53	-10.122	0	50	0	0	-12.7295	29.3306
GO Biological Processes	GO:2001242	regulation of intrinsic apoptotic signaling pathway	19	-11.9566	M1	1	0	19_GO:0023052 signaling	-11.9566	16.7351	13.9421	27994	166	131	13	9.92366	2.6122	142|207|581|596|598|857|3091|3315|4318|4780|5743|6647|7157	PARP1|AKT1|BAX|BCL2|BCL2L1|CAV1|HIF1A|HSPB1|MMP9|NFE2L2|PTGS2|SOD1|TP53	-10.0924	0	33	0	0	-17.1314	47.4877
GO Biological Processes	GO:0071383	cellular response to steroid hormone stimulus	19	-11.94	M1	1	0	19_GO:0050896 response to stimulus	-11.94	14.3833	13.284	27994	208	131	14	10.687	2.69929	142|367|842|1244|1956|2099|2100|2908|2950|3383|4306|5241|5465|5467	PARP1|AR|CASP9|ABCC2|EGFR|ESR1|ESR2|NR3C1|GSTP1|ICAM1|NR3C2|PGR|PPARA|PPARD	-10.0798	0	5	0	0	-32.7337	19.2212
GO Biological Processes	GO:0071456	cellular response to hypoxia	19	-11.94	M1	1	0	19_GO:0050896 response to stimulus	-11.94	14.3833	13.284	27994	208	131	14	10.687	2.69929	207|596|891|1869|2475|3091|3162|3383|4609|4780|5467|5743|7157|7422	AKT1|BCL2|CCNB1|E2F1|MTOR|HIF1A|HMOX1|ICAM1|MYC|NFE2L2|PPARD|PTGS2|TP53|VEGFA	-10.0798	0	9	0	0	-26.9935	25.1405
GO Biological Processes	GO:1903827	regulation of cellular protein localization	19	-11.8935	M1	1	0	19_GO:0051179 localization	-11.8935	7.79908	11.0217	27994	548	131	20	15.2672	3.14246	142|207|367|596|598|841|983|1869|1950|1956|2064|2932|3458|3553|5594|5599|5743|5925|7124|7157	PARP1|AKT1|AR|BCL2|BCL2L1|CASP8|CDK1|E2F1|EGF|EGFR|ERBB2|GSK3B|IFNG|IL1B|MAPK1|MAPK8|PTGS2|RB1|TNF|TP53	-10.0353	0	53	0	0	-12.5473	42.7389
GO Biological Processes	GO:0070555	response to interleukin-1	19	-11.8553	M1	1	0	19_GO:0050896 response to stimulus	-11.8553	14.1788	13.1757	27994	211	131	14	10.687	2.69929	1147|1244|3037|3091|3383|3551|3552|3553|3576|4792|5578|5970|6347|6401	CHUK|ABCC2|HAS2|HIF1A|ICAM1|IKBKB|IL1A|IL1B|CXCL8|NFKBIA|PRKCA|RELA|CCL2|SELE	-9.99903	0	7	0	0	-30.6555	19.8339
GO Biological Processes	GO:0044843	cell cycle G1/S phase transition	19	-11.8155	M1	1	0	19_GO:0009987 cellular process	-11.8155	11.0294	12.1755	27994	310	131	16	12.2137	2.8609	207|581|595|596|891|983|1017|1026|1543|1869|1956|4609|5530|5925|6347|7157	AKT1|BAX|CCND1|BCL2|CCNB1|CDK1|CDK2|CDKN1A|CYP1A1|E2F1|EGFR|MYC|PPP3CA|RB1|CCL2|TP53	-9.96125	0	50	0	0	-12.7295	29.3306
GO Biological Processes	GO:1901615	organic hydroxy compound metabolic process	19	-11.7787	M1	1	0	19_GO:0008152 metabolic process	-11.7787	7.68686	10.9202	27994	556	131	20	15.2672	3.14246	125|231|596|847|1543|1544|1545|1576|1812|2194|3091|3458|3553|5321|5444|5467|6647|7124|7157|50506	ADH1B|AKR1B1|BCL2|CAT|CYP1A1|CYP1A2|CYP1B1|CYP3A4|DRD1|FASN|HIF1A|IFNG|IL1B|PLA2G4A|PON1|PPARD|SOD1|TNF|TP53|DUOX2	-9.9264	0	39	0	0	-14.9141	64.1084
GO Biological Processes	GO:0043523	regulation of neuron apoptotic process	19	-11.7718	M1	1	0	19_GO:0050789 regulation of biological process	-11.7718	13.98	13.0696	27994	214	131	14	10.687	2.69929	142|581|596|598|836|842|1728|3091|3162|3725|6347|6647|7124|7157	PARP1|BAX|BCL2|BCL2L1|CASP3|CASP9|NQO1|HIF1A|HMOX1|JUN|CCL2|SOD1|TNF|TP53	-9.92144	0	15	0	0	-24.5132	30.8425
GO Biological Processes	GO:0070661	leukocyte proliferation	19	-11.731	M1	1	0	19_GO:0008283 cell proliferation	-11.731	10.8889	12.083	27994	314	131	16	12.2137	2.8609	196|581|596|836|959|1026|2064|2950|3481|3552|3553|3559|3572|5594|7157|7412	AHR|BAX|BCL2|CASP3|CD40LG|CDKN1A|ERBB2|GSTP1|IGF2|IL1A|IL1B|IL2RA|IL6ST|MAPK1|TP53|VCAM1	-9.88257	0	20	0	0	-20.2541	16.3681
GO Biological Processes	GO:0046683	response to organophosphorus	19	-11.7272	M1	1	0	19_GO:0050896 response to stimulus	-11.7272	18.9951	14.3709	27994	135	131	12	9.16031	2.52033	196|1277|2353|3309|3553|5743|5970|6532|6647|6772|7056|50506	AHR|COL1A1|FOS|HSPA5|IL1B|PTGS2|RELA|SLC6A4|SOD1|STAT1|THBD|DUOX2	-9.88208	0	44	0	0	-13.9064	19.9448
GO Biological Processes	GO:0006633	fatty acid biosynthetic process	19	-11.7266	M1	1	0	19_GO:0008152 metabolic process	-11.7266	16.058	13.6223	27994	173	131	13	9.92366	2.6122	240|1543|1544|1576|2194|2944|2946|2950|3553|4048|5321|5742|5743	ALOX5|CYP1A1|CYP1A2|CYP3A4|FASN|GSTM1|GSTM2|GSTP1|IL1B|LTA4H|PLA2G4A|PTGS1|PTGS2	-9.88208	0	32	0	0	-17.2246	56.5662
GO Biological Processes	GO:0098869	cellular oxidant detoxification	19	-11.6719	M1	1	0	19_GO:0098754 detoxification	-11.6719	22.8218	15.2133	27994	103	131	11	8.39695	2.42315	847|1728|2946|2950|4353|4780|5742|5743|6647|7124|50506	CAT|NQO1|GSTM2|GSTP1|MPO|NFE2L2|PTGS1|PTGS2|SOD1|TNF|DUOX2	-9.82922	0	41	0	0	-14.6448	41.0951
GO Biological Processes	GO:0036294	cellular response to decreased oxygen levels	19	-11.6625	M1	1	0	19_GO:0050896 response to stimulus	-11.6625	13.7235	12.9314	27994	218	131	14	10.687	2.69929	207|596|891|1869|2475|3091|3162|3383|4609|4780|5467|5743|7157|7422	AKT1|BCL2|CCNB1|E2F1|MTOR|HIF1A|HMOX1|ICAM1|MYC|NFE2L2|PPARD|PTGS2|TP53|VEGFA	-9.82365	0	9	0	0	-26.9935	25.1405
GO Biological Processes	GO:0043281	regulation of cysteine-type endopeptidase activity involved in apoptotic process	19	-11.6625	M1	1	0	19_GO:0050789 regulation of biological process	-11.6625	13.7235	12.9314	27994	218	131	14	10.687	2.69929	207|581|841|842|1509|1800|2152|4318|4609|5468|5743|5894|7124|7422	AKT1|BAX|CASP8|CASP9|CTSD|DPEP1|F3|MMP9|MYC|PPARG|PTGS2|RAF1|TNF|VEGFA	-9.82365	0	52	0	0	-12.6089	14.2463
GO Biological Processes	GO:0038034	signal transduction in absence of ligand	19	-11.6428	M1	1	0	19_GO:0023052 signaling	-11.6428	28.4926	16.3472	27994	75	131	10	7.63359	2.31999	207|581|596|598|836|842|2932|3552|3553|7124	AKT1|BAX|BCL2|BCL2L1|CASP3|CASP9|GSK3B|IL1A|IL1B|TNF	-9.80966	0	58	1	1	-11.6428	35.6158
GO Biological Processes	GO:0043627	response to estrogen	19	-11.6428	M1	1	0	19_GO:0050896 response to stimulus	-11.6428	28.4926	16.3472	27994	75	131	10	7.63359	2.31999	367|595|760|857|1244|2099|2155|3162|5468|5594	AR|CCND1|CA2|CAV1|ABCC2|ESR1|F7|HMOX1|PPARG|MAPK1	-9.80966	0	31	0	0	-18.0915	106.847
GO Biological Processes	GO:0097192	extrinsic apoptotic signaling pathway in absence of ligand	19	-11.6428	M1	1	0	19_GO:0023052 signaling	-11.6428	28.4926	16.3472	27994	75	131	10	7.63359	2.31999	207|581|596|598|836|842|2932|3552|3553|7124	AKT1|BAX|BCL2|BCL2L1|CASP3|CASP9|GSK3B|IL1A|IL1B|TNF	-9.80966	0	58	0	0	-11.6428	35.6158
GO Biological Processes	GO:0010634	positive regulation of epithelial cell migration	19	-11.5998	M1	1	0	19_GO:0040011 locomotion	-11.5998	15.6951	13.4478	27994	177	131	13	9.92366	2.6122	207|2475|3037|3091|3162|3315|3458|3725|4318|4780|5578|5743|7422	AKT1|MTOR|HAS2|HIF1A|HMOX1|HSPB1|IFNG|JUN|MMP9|NFE2L2|PRKCA|PTGS2|VEGFA	-9.76846	0	13	0	0	-25.4494	21.3695
GO Biological Processes	GO:0022411	cellular component disassembly	19	-11.5272	M1	1	0	19_GO:0071840 cellular component organization or biogenesis	-11.5272	7.44581	10.6991	27994	574	131	20	15.2672	3.14246	154|581|836|857|891|983|1803|2932|3091|3099|4312|4313|4314|4318|4609|5578|5579|5644|7124|7157	ADRB2|BAX|CASP3|CAV1|CCNB1|CDK1|DPP4|GSK3B|HIF1A|HK2|MMP1|MMP2|MMP3|MMP9|MYC|PRKCA|PRKCB|PRSS1|TNF|TP53	-9.69776	0	55	0	0	-12.2825	22.7335
GO Biological Processes	GO:0051235	maintenance of location	19	-11.5248	M1	1	0	19_GO:0051179 localization	-11.5248	10.5528	11.8589	27994	324	131	16	12.2137	2.8609	207|581|857|1812|2697|2946|3099|3309|3553|3627|4792|5465|5467|5468|6373|7124	AKT1|BAX|CAV1|DRD1|GJA1|GSTM2|HK2|HSPA5|IL1B|CXCL10|NFKBIA|PPARA|PPARD|PPARG|CXCL11|TNF	-9.69719	0	59	1	1	-11.5248	26.7118
GO Biological Processes	GO:0034762	regulation of transmembrane transport	19	-11.4862	M1	1	0	19_GO:0051179 localization	-11.4862	7.40709	10.6631	27994	577	131	20	15.2672	3.14246	154|207|581|596|760|857|1812|2475|2697|2946|3099|3458|3553|3627|4318|4780|5579|6347|6373|7124	ADRB2|AKT1|BAX|BCL2|CA2|CAV1|DRD1|MTOR|GJA1|GSTM2|HK2|IFNG|IL1B|CXCL10|MMP9|NFE2L2|PRKCB|CCL2|CXCL11|TNF	-9.66041	0	59	0	0	-11.5248	26.7118
GO Biological Processes	GO:0048771	tissue remodeling	19	-11.4455	M1	1	0	19_GO:0032501 multicellular organismal process	-11.4455	15.2639	13.2375	27994	182	131	13	9.92366	2.6122	154|581|760|857|1956|2697|3091|3552|4313|5530|5578|6696|7157	ADRB2|BAX|CA2|CAV1|EGFR|GJA1|HIF1A|IL1A|MMP2|PPP3CA|PRKCA|SPP1|TP53	-9.6216	0	45	0	0	-13.7627	44.9883
GO Biological Processes	GO:0042136	neurotransmitter biosynthetic process	19	-11.4425	M1	1	0	19_GO:0008152 metabolic process	-11.4425	21.7652	14.8252	27994	108	131	11	8.39695	2.42315	207|857|1545|1728|2475|3383|3458|3553|5743|6532|7124	AKT1|CAV1|CYP1B1|NQO1|MTOR|ICAM1|IFNG|IL1B|PTGS2|SLC6A4|TNF	-9.62037	0	11	0	0	-26.7386	213.695
GO Biological Processes	GO:0006809	nitric oxide biosynthetic process	19	-11.4096	M1	1	0	19_GO:0008152 metabolic process	-11.4096	27.05	15.8982	27994	79	131	10	7.63359	2.31999	207|857|1545|1728|2475|3383|3458|3553|5743|7124	AKT1|CAV1|CYP1B1|NQO1|MTOR|ICAM1|IFNG|IL1B|PTGS2|TNF	-9.58936	0	11	0	0	-26.7386	213.695
GO Biological Processes	GO:0008202	steroid metabolic process	19	-11.3648	M1	1	0	19_GO:0008152 metabolic process	-11.3648	10.2985	11.6866	27994	332	131	16	12.2137	2.8609	231|847|1543|1544|1545|1576|2099|2194|3458|3553|5444|5467|6647|6696|7124|8856	AKR1B1|CAT|CYP1A1|CYP1A2|CYP1B1|CYP3A4|ESR1|FASN|IFNG|IL1B|PON1|PPARD|SOD1|SPP1|TNF|NR1I2	-9.54638	0	39	0	0	-14.9141	64.1084
GO Biological Processes	GO:0007507	heart development	19	-11.3111	M1	1	0	19_GO:0032502 developmental process	-11.3111	7.24389	10.5104	27994	590	131	20	15.2672	3.14246	836|891|983|1026|1281|1956|2064|2475|2697|3037|3091|3725|5465|5467|5468|5594|5894|5925|7157|7422	CASP3|CCNB1|CDK1|CDKN1A|COL3A1|EGFR|ERBB2|MTOR|GJA1|HAS2|HIF1A|JUN|PPARA|PPARD|PPARG|MAPK1|RAF1|RB1|TP53|VEGFA	-9.49445	0	26	0	0	-18.934	11.7784
GO Biological Processes	GO:0019932	second-messenger-mediated signaling	19	-11.2909	M1	1	0	19_GO:0023052 signaling	-11.2909	8.43532	10.9765	27994	456	131	18	13.7405	3.00794	152|153|154|196|1812|1956|2475|2932|2946|3576|3627|5530|5578|6373|6401|7124|7412|7422	ADRA2C|ADRB1|ADRB2|AHR|DRD1|EGFR|MTOR|GSK3B|GSTM2|CXCL8|CXCL10|PPP3CA|PRKCA|CXCL11|SELE|TNF|VCAM1|VEGFA	-9.47681	0	60	1	1	-11.2909	19.4268
GO Biological Processes	GO:0006091	generation of precursor metabolites and energy	19	-11.2899	M1	1	0	19_GO:0008152 metabolic process	-11.2899	7.77816	10.7189	27994	522	131	19	14.5038	3.07666	125|207|231|847|891|983|1544|2475|2932|3091|3099|3458|3481|3572|4609|5465|5467|7157|653361	ADH1B|AKT1|AKR1B1|CAT|CCNB1|CDK1|CYP1A2|MTOR|GSK3B|HIF1A|HK2|IFNG|IGF2|IL6ST|MYC|PPARA|PPARD|TP53|NCF1	-9.47681	0	29	0	0	-18.4437	33.7413
GO Biological Processes	GO:0055123	digestive system development	19	-11.2856	M1	1	0	19_GO:0032502 developmental process	-11.2856	17.4445	13.7068	27994	147	131	12	9.16031	2.52033	596|891|1026|1281|1543|1956|3091|3481|3572|3576|5925|7124	BCL2|CCNB1|CDKN1A|COL3A1|CYP1A1|EGFR|HIF1A|IGF2|IL6ST|CXCL8|RB1|TNF	-9.4743	0	51	0	0	-12.6756	53.4237
GO Biological Processes	GO:0030193	regulation of blood coagulation	19	-11.2431	M1	1	0	19_GO:0032501 multicellular organismal process	-11.2431	26.0603	15.5828	27994	82	131	10	7.63359	2.31999	857|2152|2155|4780|5054|5321|5327|5328|5578|7056	CAV1|F3|F7|NFE2L2|SERPINE1|PLA2G4A|PLAT|PLAU|PRKCA|THBD	-9.43356	0	3	0	0	-33.9492	45.7917
GO Biological Processes	GO:0030198	extracellular matrix organization	19	-11.2369	M1	1	0	19_GO:0071840 cellular component organization or biogenesis	-11.2369	9.15065	11.2151	27994	397	131	17	12.9771	2.93609	857|1277|1281|1545|1803|3037|3383|4312|4313|4314|4318|5054|5644|5925|6696|7124|7412	CAV1|COL1A1|COL3A1|CYP1B1|DPP4|HAS2|ICAM1|MMP1|MMP2|MMP3|MMP9|SERPINE1|PRSS1|RB1|SPP1|TNF|VCAM1	-9.42917	0	55	0	0	-12.2825	22.7335
GO Biological Processes	GO:0003012	muscle system process	19	-11.228	M1	1	0	19_GO:0032501 multicellular organismal process	-11.228	8.36196	10.9165	27994	460	131	18	13.7405	3.00794	142|152|154|857|1129|1147|1812|2475|2697|2946|3162|3553|3572|5465|5530|5578|5743|6647	PARP1|ADRA2C|ADRB2|CAV1|CHRM2|CHUK|DRD1|MTOR|GJA1|GSTM2|HMOX1|IL1B|IL6ST|PPARA|PPP3CA|PRKCA|PTGS2|SOD1	-9.42207	0	61	1	1	-11.228	26.7118
GO Biological Processes	GO:0032868	response to insulin	19	-11.2213	M1	1	0	19_GO:0050896 response to stimulus	-11.2213	11.2471	11.9223	27994	285	131	15	11.4504	2.78207	142|207|847|2475|2932|2950|3383|3481|3553|3645|5465|5468|5579|5970|6772	PARP1|AKT1|CAT|MTOR|GSK3B|GSTP1|ICAM1|IGF2|IL1B|INSRR|PPARA|PPARG|PRKCB|RELA|STAT1	-9.41713	0	6	0	0	-32.439	12.8345
GO Biological Processes	GO:0007346	regulation of mitotic cell cycle	19	-11.2131	M1	1	0	19_GO:0050789 regulation of biological process	-11.2131	6.68791	10.2258	27994	671	131	21	16.0305	3.20552	207|581|595|596|598|891|983|1017|1026|1543|1869|1950|1956|3481|3552|3553|5578|5925|6347|7124|7157	AKT1|BAX|CCND1|BCL2|BCL2L1|CCNB1|CDK1|CDK2|CDKN1A|CYP1A1|E2F1|EGF|EGFR|IGF2|IL1A|IL1B|PRKCA|RB1|CCL2|TNF|TP53	-9.41067	0	50	0	0	-12.7295	29.3306
GO Biological Processes	GO:0007249	I-kappaB kinase/NF-kappaB signaling	19	-11.1996	M1	1	0	19_GO:0023052 signaling	-11.1996	11.2078	11.8975	27994	286	131	15	11.4504	2.78207	207|841|1147|2099|2697|2950|3162|3315|3551|3553|4792|5579|5970|6772|7124	AKT1|CASP8|CHUK|ESR1|GJA1|GSTP1|HMOX1|HSPB1|IKBKB|IL1B|NFKBIA|PRKCB|RELA|STAT1|TNF	-9.39892	0	24	0	0	-19.0213	42.7389
GO Biological Processes	GO:1900046	regulation of hemostasis	19	-11.189	M1	1	0	19_GO:0050789 regulation of biological process	-11.189	25.7463	15.4813	27994	83	131	10	7.63359	2.31999	857|2152|2155|4780|5054|5321|5327|5328|5578|7056	CAV1|F3|F7|NFE2L2|SERPINE1|PLA2G4A|PLAT|PLAU|PRKCA|THBD	-9.39002	0	3	0	0	-33.9492	45.7917
GO Biological Processes	GO:0001819	positive regulation of cytokine production	19	-11.1813	M1	1	0	19_GO:0048518 positive regulation of biological process	-11.1813	8.30778	10.8721	27994	463	131	18	13.7405	3.00794	841|959|1147|1545|2152|3091|3162|3315|3458|3552|3553|3572|5054|5743|5970|6647|6772|7124	CASP8|CD40LG|CHUK|CYP1B1|F3|HIF1A|HMOX1|HSPB1|IFNG|IL1A|IL1B|IL6ST|SERPINE1|PTGS2|RELA|SOD1|STAT1|TNF	-9.38404	0	54	0	0	-12.3313	10.82
GO Biological Processes	GO:0051046	regulation of secretion	19	-11.1564	M1	1	0	19_GO:0051179 localization	-11.1564	6.2434	10.0011	27994	753	131	22	16.7939	3.26601	152|240|959|1129|1803|1812|1950|1956|2697|2932|3091|3162|3458|3552|3553|5467|5530|5578|5579|6532|6696|7124	ADRA2C|ALOX5|CD40LG|CHRM2|DPP4|DRD1|EGF|EGFR|GJA1|GSK3B|HIF1A|HMOX1|IFNG|IL1A|IL1B|PPARD|PPP3CA|PRKCA|PRKCB|SLC6A4|SPP1|TNF	-9.36082	0	40	0	0	-14.7066	12.987
GO Biological Processes	GO:0007566	embryo implantation	19	-11.1459	M1	1	0	19_GO:0022414 reproductive process	-11.1459	33.1595	16.8108	27994	58	131	9	6.87023	2.21001	2697|3553|4313|4318|5467|5743|6647|6696|7422	GJA1|IL1B|MMP2|MMP9|PPARD|PTGS2|SOD1|SPP1|VEGFA	-9.35212	0	16	0	0	-23.5716	42.7389
GO Biological Processes	GO:0046209	nitric oxide metabolic process	19	-11.1357	M1	1	0	19_GO:0008152 metabolic process	-11.1357	25.4398	15.3817	27994	84	131	10	7.63359	2.31999	207|857|1545|1728|2475|3383|3458|3553|5743|7124	AKT1|CAV1|CYP1B1|NQO1|MTOR|ICAM1|IFNG|IL1B|PTGS2|TNF	-9.34355	0	11	0	0	-26.7386	213.695
GO Biological Processes	GO:0090087	regulation of peptide transport	19	-11.1167	M1	1	0	19_GO:0051179 localization	-11.1167	6.60911	10.1455	27994	679	131	21	16.0305	3.20552	152|240|760|959|983|1803|1956|2064|2697|2932|3091|3458|3552|3553|5467|5530|5578|5594|5743|7124|7157	ADRA2C|ALOX5|CA2|CD40LG|CDK1|DPP4|EGFR|ERBB2|GJA1|GSK3B|HIF1A|IFNG|IL1A|IL1B|PPARD|PPP3CA|PRKCA|MAPK1|PTGS2|TNF|TP53	-9.32627	0	40	0	0	-14.7066	12.987
GO Biological Processes	GO:0016999	antibiotic metabolic process	19	-11.113	M1	1	0	19_GO:0008152 metabolic process	-11.113	16.8706	13.4528	27994	152	131	12	9.16031	2.52033	125|231|847|1244|1543|1544|1800|1956|4314|4353|6647|50506	ADH1B|AKR1B1|CAT|ABCC2|CYP1A1|CYP1A2|DPEP1|EGFR|MMP3|MPO|SOD1|DUOX2	-9.32431	0	43	0	0	-14.0637	50.2811
GO Biological Processes	GO:0070663	regulation of leukocyte proliferation	19	-11.0981	M1	1	0	19_GO:0008283 cell proliferation	-11.0981	12.4655	12.2316	27994	240	131	14	10.687	2.69929	196|596|836|959|1026|2064|2950|3481|3552|3553|3559|3572|5594|7412	AHR|BCL2|CASP3|CD40LG|CDKN1A|ERBB2|GSTP1|IGF2|IL1A|IL1B|IL2RA|IL6ST|MAPK1|VCAM1	-9.31105	0	20	0	0	-20.2541	16.3681
GO Biological Processes	GO:0002694	regulation of leukocyte activation	19	-11.0758	M1	1	0	19_GO:0002376 immune system process	-11.0758	7.02943	10.3065	27994	608	131	20	15.2672	3.14246	196|207|596|836|857|959|1026|1803|2064|3162|3458|3481|3552|3553|3559|3572|5321|6347|6647|7412	AHR|AKT1|BCL2|CASP3|CAV1|CD40LG|CDKN1A|DPP4|ERBB2|HMOX1|IFNG|IGF2|IL1A|IL1B|IL2RA|IL6ST|PLA2G4A|CCL2|SOD1|VCAM1	-9.29208	0	20	0	0	-20.2541	16.3681
GO Biological Processes	GO:1904645	response to amyloid-beta	19	-11.0758	M1	1	0	19_GO:0050896 response to stimulus	-11.0758	32.5975	16.6591	27994	59	131	9	6.87023	2.21001	142|154|2697|2932|3383|4313|4314|4318|7412	PARP1|ADRB2|GJA1|GSK3B|ICAM1|MMP2|MMP3|MMP9|VCAM1	-9.29208	0	62	1	1	-11.0758	32.5975
GO Biological Processes	GO:1902105	regulation of leukocyte differentiation	19	-11.0712	M1	1	0	19_GO:0002376 immune system process	-11.0712	10.9775	11.7517	27994	292	131	15	11.4504	2.78207	760|841|2064|2353|2475|3458|3552|3553|3559|3725|4609|5578|5925|6647|7124	CA2|CASP8|ERBB2|FOS|MTOR|IFNG|IL1A|IL1B|IL2RA|JUN|MYC|PRKCA|RB1|SOD1|TNF	-9.28918	0	30	0	0	-18.3881	31.6585
GO Biological Processes	GO:0061061	muscle structure development	19	-11.069	M1	1	0	19_GO:0032502 developmental process	-11.069	6.57041	10.1059	27994	683	131	21	16.0305	3.20552	207|596|836|857|891|983|1147|1281|2353|2475|2697|3481|3486|3627|5465|5467|5530|5594|5925|7124|7422	AKT1|BCL2|CASP3|CAV1|CCNB1|CDK1|CHUK|COL3A1|FOS|MTOR|GJA1|IGF2|IGFBP3|CXCL10|PPARA|PPARD|PPP3CA|MAPK1|RB1|TNF|VEGFA	-9.28861	0	63	1	1	-11.069	71.2316
GO Biological Processes	GO:2000116	regulation of cysteine-type endopeptidase activity	19	-11.0496	M1	1	0	19_GO:0050789 regulation of biological process	-11.0496	12.3625	12.1725	27994	242	131	14	10.687	2.69929	207|581|841|842|1509|1800|2152|4318|4609|5468|5743|5894|7124|7422	AKT1|BAX|CASP8|CASP9|CTSD|DPEP1|F3|MMP9|MYC|PPARG|PTGS2|RAF1|TNF|VEGFA	-9.27092	0	52	0	0	-12.6089	14.2463
GO Biological Processes	GO:0030336	negative regulation of cell migration	19	-11.0201	M1	1	0	19_GO:0040011 locomotion	-11.0201	9.7689	11.3194	27994	350	131	16	12.2137	2.8609	207|596|1281|1545|1800|1803|2697|2950|3162|3486|4780|5054|5467|5468|6347|7124	AKT1|BCL2|COL3A1|CYP1B1|DPEP1|DPP4|GJA1|GSTP1|HMOX1|IGFBP3|NFE2L2|SERPINE1|PPARD|PPARG|CCL2|TNF	-9.24306	0	64	1	1	-11.0201	28.1177
GO Biological Processes	GO:0033559	unsaturated fatty acid metabolic process	19	-11.0165	M1	1	0	19_GO:0008152 metabolic process	-11.0165	19.9207	14.1224	27994	118	131	11	8.39695	2.42315	240|1543|1544|1545|2944|2946|2950|3553|5321|5742|5743	ALOX5|CYP1A1|CYP1A2|CYP1B1|GSTM1|GSTM2|GSTP1|IL1B|PLA2G4A|PTGS1|PTGS2	-9.24112	0	32	0	0	-17.2246	56.5662
GO Biological Processes	GO:0009615	response to virus	19	-11.0015	M1	1	0	19_GO:0051704 multi-organism process	-11.0015	9.74107	11.2998	27994	351	131	16	12.2137	2.8609	596|598|1129|1147|1543|3315|3458|3551|3553|3559|3627|4953|5970|6772|7124|50506	BCL2|BCL2L1|CHRM2|CHUK|CYP1A1|HSPB1|IFNG|IKBKB|IL1B|IL2RA|CXCL10|ODC1|RELA|STAT1|TNF|DUOX2	-9.22777	0	65	1	1	-11.0015	9.74107
GO Biological Processes	GO:0023061	signal release	19	-10.9827	M1	1	0	19_GO:0023052 signaling	-10.9827	8.08089	10.6839	27994	476	131	18	13.7405	3.00794	152|240|1129|1803|1812|1956|2697|2932|3091|3458|3553|5467|5530|5578|5579|5894|6696|7124	ADRA2C|ALOX5|CHRM2|DPP4|DRD1|EGFR|GJA1|GSK3B|HIF1A|IFNG|IL1B|PPARD|PPP3CA|PRKCA|PRKCB|RAF1|SPP1|TNF	-9.21053	0	40	0	0	-14.7066	12.987
GO Biological Processes	GO:2001057	reactive nitrogen species metabolic process	19	-10.9797	M1	1	0	19_GO:0008152 metabolic process	-10.9797	24.5626	15.0929	27994	87	131	10	7.63359	2.31999	207|857|1545|1728|2475|3383|3458|3553|5743|7124	AKT1|CAV1|CYP1B1|NQO1|MTOR|ICAM1|IFNG|IL1B|PTGS2|TNF	-9.20921	0	11	0	0	-26.7386	213.695
GO Biological Processes	GO:1903530	regulation of secretion by cell	19	-10.9627	M1	1	0	19_GO:0051179 localization	-10.9627	6.48495	10.0179	27994	692	131	21	16.0305	3.20552	152|240|959|1129|1803|1812|1956|2697|2932|3091|3162|3458|3552|3553|5467|5530|5578|5579|6532|6696|7124	ADRA2C|ALOX5|CD40LG|CHRM2|DPP4|DRD1|EGFR|GJA1|GSK3B|HIF1A|HMOX1|IFNG|IL1A|IL1B|PPARD|PPP3CA|PRKCA|PRKCB|SLC6A4|SPP1|TNF	-9.19384	0	40	0	0	-14.7066	12.987
GO Biological Processes	GO:1904019	epithelial cell apoptotic process	19	-10.9361	M1	1	0	19_GO:0009987 cellular process	-10.9361	19.5887	13.9922	27994	120	131	11	8.39695	2.42315	598|959|1869|2475|3162|3383|4780|5054|5925|6347|7124	BCL2L1|CD40LG|E2F1|MTOR|HMOX1|ICAM1|NFE2L2|SERPINE1|RB1|CCL2|TNF	-9.16878	0	66	1	1	-10.9361	21.3695
GO Biological Processes	GO:0050818	regulation of coagulation	19	-10.9291	M1	1	0	19_GO:0032501 multicellular organismal process	-10.9291	24.2835	14.9999	27994	88	131	10	7.63359	2.31999	857|2152|2155|4780|5054|5321|5327|5328|5578|7056	CAV1|F3|F7|NFE2L2|SERPINE1|PLA2G4A|PLAT|PLAU|PRKCA|THBD	-9.16496	0	3	0	0	-33.9492	45.7917
GO Biological Processes	GO:0090559	regulation of membrane permeability	19	-10.9291	M1	1	0	19_GO:0065007 biological regulation	-10.9291	24.2835	14.9999	27994	88	131	10	7.63359	2.31999	581|596|598|841|1869|2475|2932|3099|5599|7157	BAX|BCL2|BCL2L1|CASP8|E2F1|MTOR|GSK3B|HK2|MAPK8|TP53	-9.16496	0	53	0	0	-12.5473	42.7389
GO Biological Processes	GO:1902895	positive regulation of pri-miRNA transcription by RNA polymerase II	19	-10.901	M1	1	0	19_GO:0048518 positive regulation of biological process	-10.901	42.7389	18.1132	27994	40	131	8	6.10687	2.09214	2353|2908|3091|3725|5468|5970|7124|7157	FOS|NR3C1|HIF1A|JUN|PPARG|RELA|TNF|TP53	-9.1385	0	47	0	0	-13.3228	45.7917
GO Biological Processes	GO:0008625	extrinsic apoptotic signaling pathway via death domain receptors	19	-10.879	M1	1	0	19_GO:0023052 signaling	-10.879	24.0106	14.9083	27994	89	131	10	7.63359	2.31999	581|596|598|841|2932|3162|3383|5054|5894|7124	BAX|BCL2|BCL2L1|CASP8|GSK3B|HMOX1|ICAM1|SERPINE1|RAF1|TNF	-9.11809	0	8	0	0	-28.7104	36.4845
GO Biological Processes	GO:0010632	regulation of epithelial cell migration	19	-10.8635	M1	1	0	19_GO:0040011 locomotion	-10.8635	10.614	11.518	27994	302	131	15	11.4504	2.78207	207|2475|3037|3091|3162|3315|3458|3725|4318|4780|5468|5578|5743|7124|7422	AKT1|MTOR|HAS2|HIF1A|HMOX1|HSPB1|IFNG|JUN|MMP9|NFE2L2|PPARG|PRKCA|PTGS2|TNF|VEGFA	-9.10416	0	13	0	0	-25.4494	21.3695
GO Biological Processes	GO:0043122	regulation of I-kappaB kinase/NF-kappaB signaling	19	-10.8137	M1	1	0	19_GO:0023052 signaling	-10.8137	11.8719	11.8873	27994	252	131	14	10.687	2.69929	207|841|1147|2099|2697|2950|3162|3315|3551|3553|5579|5970|6772|7124	AKT1|CASP8|CHUK|ESR1|GJA1|GSTP1|HMOX1|HSPB1|IKBKB|IL1B|PRKCB|RELA|STAT1|TNF	-9.056	0	24	0	0	-19.0213	42.7389
GO Biological Processes	GO:0001558	regulation of cell growth	19	-10.803	M1	1	0	19_GO:0040007 growth	-10.803	8.5882	10.7827	27994	423	131	17	12.9771	2.93609	207|596|1026|1956|2064|2100|2475|2697|2932|3486|5465|5467|5468|5925|6696|7157|7422	AKT1|BCL2|CDKN1A|EGFR|ERBB2|ESR2|MTOR|GJA1|GSK3B|IGFBP3|PPARA|PPARD|PPARG|RB1|SPP1|TP53|VEGFA	-9.04686	0	26	0	0	-18.934	11.7784
GO Biological Processes	GO:0051101	regulation of DNA binding	19	-10.7795	M1	1	0	19_GO:0065007 biological regulation	-10.7795	18.9568	13.741	27994	124	131	11	8.39695	2.42315	142|1869|1950|3162|3458|3725|4318|4792|5468|5599|5925	PARP1|E2F1|EGF|HMOX1|IFNG|JUN|MMP9|NFKBIA|PPARG|MAPK8|RB1	-9.02485	0	67	1	1	-10.7795	25.6434
GO Biological Processes	GO:0045926	negative regulation of growth	19	-10.7678	M1	1	0	19_GO:0040007 growth	-10.7678	11.7784	11.8322	27994	254	131	14	10.687	2.69929	153|154|596|1026|2100|2697|3091|5465|5467|5468|5925|6532|6696|7157	ADRB1|ADRB2|BCL2|CDKN1A|ESR2|GJA1|HIF1A|PPARA|PPARD|PPARG|RB1|SLC6A4|SPP1|TP53	-9.01476	0	26	0	0	-18.934	11.7784
GO Biological Processes	GO:0001505	regulation of neurotransmitter levels	19	-10.7476	M1	1	0	19_GO:0065007 biological regulation	-10.7476	9.36744	11.0332	27994	365	131	16	12.2137	2.8609	207|857|1129|1545|1728|1812|2475|2932|3383|3458|3553|5579|5743|6530|6532|7124	AKT1|CAV1|CHRM2|CYP1B1|NQO1|DRD1|MTOR|GSK3B|ICAM1|IFNG|IL1B|PRKCB|PTGS2|SLC6A2|SLC6A4|TNF	-8.99768	0	11	0	0	-26.7386	213.695
GO Biological Processes	GO:2000146	negative regulation of cell motility	19	-10.7476	M1	1	0	19_GO:0040011 locomotion	-10.7476	9.36744	11.0332	27994	365	131	16	12.2137	2.8609	207|596|1281|1545|1800|1803|2697|2950|3162|3486|4780|5054|5467|5468|6347|7124	AKT1|BCL2|COL3A1|CYP1B1|DPEP1|DPP4|GJA1|GSTP1|HMOX1|IGFBP3|NFE2L2|SERPINE1|PPARD|PPARG|CCL2|TNF	-8.99768	0	64	0	0	-11.0201	28.1177
GO Biological Processes	GO:1903708	positive regulation of hemopoiesis	19	-10.738	M1	1	0	19_GO:0002376 immune system process	-10.738	13.4204	12.2984	27994	207	131	13	9.92366	2.6122	760|841|2353|3091|3458|3552|3553|3559|3725|5578|5925|6772|7124	CA2|CASP8|FOS|HIF1A|IFNG|IL1A|IL1B|IL2RA|JUN|PRKCA|RB1|STAT1|TNF	-8.98961	0	30	0	0	-18.3881	31.6585
GO Biological Processes	GO:2000134	negative regulation of G1/S transition of mitotic cell cycle	19	-10.7032	M1	1	0	19_GO:0048519 negative regulation of biological process	-10.7032	18.6559	13.6197	27994	126	131	11	8.39695	2.42315	581|595|596|891|983|1017|1026|1869|5925|6347|7157	BAX|CCND1|BCL2|CCNB1|CDK1|CDK2|CDKN1A|E2F1|RB1|CCL2|TP53	-8.95634	0	50	0	0	-12.7295	29.3306
GO Biological Processes	GO:0045786	negative regulation of cell cycle	19	-10.701	M1	1	0	19_GO:0048519 negative regulation of biological process	-10.701	6.69889	9.98438	27994	638	131	20	15.2672	3.14246	581|595|596|598|836|891|983|1017|1026|1869|1956|2475|3458|3576|4609|5743|5925|6347|7124|7157	BAX|CCND1|BCL2|BCL2L1|CASP3|CCNB1|CDK1|CDK2|CDKN1A|E2F1|EGFR|MTOR|IFNG|CXCL8|MYC|PTGS2|RB1|CCL2|TNF|TP53	-8.95571	0	50	0	0	-12.7295	29.3306
GO Biological Processes	GO:0071229	cellular response to acid chemical	19	-10.6595	M1	1	0	19_GO:0050896 response to stimulus	-10.6595	13.2287	12.1966	27994	210	131	13	9.92366	2.6122	207|598|891|1277|1281|1869|1956|2475|4313|5468|6532|7124|7422	AKT1|BCL2L1|CCNB1|COL1A1|COL3A1|E2F1|EGFR|MTOR|MMP2|PPARG|SLC6A4|TNF|VEGFA	-8.91566	0	14	0	0	-24.5508	24.3687
GO Biological Processes	GO:0008631	intrinsic apoptotic signaling pathway in response to oxidative stress	19	-10.6307	M1	1	0	19_GO:0023052 signaling	-10.6307	39.7571	17.4395	27994	43	131	8	6.10687	2.09214	142|207|596|1545|3091|3315|4780|6647	PARP1|AKT1|BCL2|CYP1B1|HIF1A|HSPB1|NFE2L2|SOD1	-8.88836	0	33	0	0	-17.1314	47.4877
GO Biological Processes	GO:0045931	positive regulation of mitotic cell cycle	19	-10.5999	M1	1	0	19_GO:0048518 positive regulation of biological process	-10.5999	15.2639	12.7149	27994	168	131	12	9.16031	2.52033	207|595|891|983|1543|1950|1956|3481|3552|3553|5578|5925	AKT1|CCND1|CCNB1|CDK1|CYP1A1|EGF|EGFR|IGF2|IL1A|IL1B|PRKCA|RB1	-8.85917	0	50	0	0	-12.7295	29.3306
GO Biological Processes	GO:0002685	regulation of leukocyte migration	19	-10.5821	M1	1	0	19_GO:0040011 locomotion	-10.5821	13.0424	12.0969	27994	213	131	13	9.92366	2.6122	207|1803|2155|3162|3383|3576|3627|5054|5594|6347|6401|7124|7422	AKT1|DPP4|F7|HMOX1|ICAM1|CXCL8|CXCL10|SERPINE1|MAPK1|CCL2|SELE|TNF|VEGFA	-8.84288	0	42	0	0	-14.4051	14.5229
GO Biological Processes	GO:0051223	regulation of protein transport	19	-10.5806	M1	1	0	19_GO:0051179 localization	-10.5806	6.59551	9.88159	27994	648	131	20	15.2672	3.14246	152|240|959|983|1803|1956|2064|2697|2932|3091|3458|3552|3553|5467|5530|5578|5594|5743|7124|7157	ADRA2C|ALOX5|CD40LG|CDK1|DPP4|EGFR|ERBB2|GJA1|GSK3B|HIF1A|IFNG|IL1A|IL1B|PPARD|PPP3CA|PRKCA|MAPK1|PTGS2|TNF|TP53	-8.84286	0	40	0	0	-14.7066	12.987
GO Biological Processes	GO:0045637	regulation of myeloid cell differentiation	19	-10.544	M1	1	0	19_GO:0002376 immune system process	-10.544	11.3323	11.5657	27994	264	131	14	10.687	2.69929	760|841|2353|2475|3091|3458|3725|4609|4792|5578|5579|5925|6772|7124	CA2|CASP8|FOS|MTOR|HIF1A|IFNG|JUN|MYC|NFKBIA|PRKCA|PRKCB|RB1|STAT1|TNF	-8.80771	0	30	0	0	-18.3881	31.6585
GO Biological Processes	GO:0060249	anatomical structure homeostasis	19	-10.5353	M1	1	0	19_GO:0065007 biological regulation	-10.5353	8.25638	10.5196	27994	440	131	17	12.9771	2.93609	142|154|231|581|596|760|1956|3091|3315|4609|5578|5594|5925|6530|6647|6696|7422	PARP1|ADRB2|AKR1B1|BAX|BCL2|CA2|EGFR|HIF1A|HSPB1|MYC|PRKCA|MAPK1|RB1|SLC6A2|SOD1|SPP1|VEGFA	-8.80054	0	45	0	0	-13.7627	44.9883
GO Biological Processes	GO:1902532	negative regulation of intracellular signal transduction	19	-10.4903	M1	1	0	19_GO:0048519 negative regulation of biological process	-10.4903	6.98829	10.0014	27994	581	131	19	14.5038	3.07666	207|596|598|841|857|2099|2475|2932|2946|2950|3091|3315|3553|4318|4609|4780|5743|5970|6772	AKT1|BCL2|BCL2L1|CASP8|CAV1|ESR1|MTOR|GSK3B|GSTM2|GSTP1|HIF1A|HSPB1|IL1B|MMP9|MYC|NFE2L2|PTGS2|RELA|STAT1	-8.75707	0	33	0	0	-17.1314	47.4877
GO Biological Processes	GO:1902807	negative regulation of cell cycle G1/S phase transition	19	-10.4821	M1	1	0	19_GO:0048519 negative regulation of biological process	-10.4821	17.8079	13.2721	27994	132	131	11	8.39695	2.42315	581|595|596|891|983|1017|1026|1869|5925|6347|7157	BAX|CCND1|BCL2|CCNB1|CDK1|CDK2|CDKN1A|E2F1|RB1|CCL2|TP53	-8.75033	0	50	0	0	-12.7295	29.3306
GO Biological Processes	GO:0051249	regulation of lymphocyte activation	19	-10.4219	M1	1	0	19_GO:0002376 immune system process	-10.4219	7.46894	10.1597	27994	515	131	18	13.7405	3.00794	196|207|596|836|857|959|1026|1803|2064|3458|3481|3552|3553|3559|3572|6347|6647|7412	AHR|AKT1|BCL2|CASP3|CAV1|CD40LG|CDKN1A|DPP4|ERBB2|IFNG|IGF2|IL1A|IL1B|IL2RA|IL6ST|CCL2|SOD1|VCAM1	-8.69157	0	20	0	0	-20.2541	16.3681
GO Biological Processes	GO:0090303	positive regulation of wound healing	19	-10.3806	M1	1	0	19_GO:0048518 positive regulation of biological process	-10.3806	27.475	15.207	27994	70	131	9	6.87023	2.21001	2152|2155|2475|4780|5054|5321|5467|7056|50506	F3|F7|MTOR|NFE2L2|SERPINE1|PLA2G4A|PPARD|THBD|DUOX2	-8.65175	0	3	0	0	-33.9492	45.7917
GO Biological Processes	GO:0048565	digestive tract development	19	-10.3757	M1	1	0	19_GO:0032502 developmental process	-10.3757	17.4122	13.1068	27994	135	131	11	8.39695	2.42315	596|891|1026|1281|1543|1956|3091|3572|3576|5925|7124	BCL2|CCNB1|CDKN1A|COL3A1|CYP1A1|EGFR|HIF1A|IL6ST|CXCL8|RB1|TNF	-8.64829	0	51	0	0	-12.6756	53.4237
GO Biological Processes	GO:0008585	female gonad development	19	-10.3658	M1	1	0	19_GO:0022414 reproductive process	-10.3658	21.3695	13.9917	27994	100	131	10	7.63359	2.31999	581|596|598|836|2099|3309|3383|5241|6647|7422	BAX|BCL2|BCL2L1|CASP3|ESR1|HSPA5|ICAM1|PGR|SOD1|VEGFA	-8.6399	0	68	1	1	-10.3658	26.2432
GO Biological Processes	GO:0034349	glial cell apoptotic process	19	-10.3446	M1	1	0	19_GO:0009987 cellular process	-10.3446	85.4779	22.4398	27994	15	131	6	4.58015	1.82652	836|842|5578|5925|6347|7157	CASP3|CASP9|PRKCA|RB1|CCL2|TP53	-8.62011	0	69	1	1	-10.3446	85.4779
GO Biological Processes	GO:0090066	regulation of anatomical structure size	19	-10.3399	M1	1	0	19_GO:0065007 biological regulation	-10.3399	7.38292	10.084	27994	521	131	18	13.7405	3.00794	152|153|154|207|857|1812|1956|2475|2697|2932|3162|3383|5467|5743|6532|6647|6696|7422	ADRA2C|ADRB1|ADRB2|AKT1|CAV1|DRD1|EGFR|MTOR|GJA1|GSK3B|HMOX1|ICAM1|PPARD|PTGS2|SLC6A4|SOD1|SPP1|VEGFA	-8.61692	0	36	0	0	-16.0134	50.2811
GO Biological Processes	GO:0008406	gonad development	19	-10.3328	M1	1	0	19_GO:0022414 reproductive process	-10.3328	12.4575	11.7786	27994	223	131	13	9.92366	2.6122	367|581|595|596|598|836|2099|3309|3383|5241|6647|7422|8648	AR|BAX|CCND1|BCL2|BCL2L1|CASP3|ESR1|HSPA5|ICAM1|PGR|SOD1|VEGFA|NCOA1	-8.61125	0	68	0	0	-10.3658	26.2432
GO Biological Processes	GO:0050863	regulation of T cell activation	19	-10.2834	M1	1	0	19_GO:0002376 immune system process	-10.2834	9.65488	10.8776	27994	332	131	15	11.4504	2.78207	207|836|857|959|1803|2064|3458|3481|3552|3553|3559|3572|6347|6647|7412	AKT1|CASP3|CAV1|CD40LG|DPP4|ERBB2|IFNG|IGF2|IL1A|IL1B|IL2RA|IL6ST|CCL2|SOD1|VCAM1	-8.56335	0	20	0	0	-20.2541	16.3681
GO Biological Processes	GO:0045639	positive regulation of myeloid cell differentiation	19	-10.2791	M1	1	0	19_GO:0002376 immune system process	-10.2791	20.9505	13.8407	27994	102	131	10	7.63359	2.31999	760|841|2353|3091|3458|3725|5578|5925|6772|7124	CA2|CASP8|FOS|HIF1A|IFNG|JUN|PRKCA|RB1|STAT1|TNF	-8.56048	0	30	0	0	-18.3881	31.6585
GO Biological Processes	GO:0009914	hormone transport	19	-10.2651	M1	1	0	19_GO:0051179 localization	-10.2651	9.62589	10.8577	27994	333	131	15	11.4504	2.78207	152|240|1244|1803|1956|2697|3091|3458|3553|5467|5530|5578|5894|6696|7124	ADRA2C|ALOX5|ABCC2|DPP4|EGFR|GJA1|HIF1A|IFNG|IL1B|PPARD|PPP3CA|PRKCA|RAF1|SPP1|TNF	-8.54791	0	40	0	0	-14.7066	12.987
GO Biological Processes	GO:0045137	development of primary sexual characteristics	19	-10.189	M1	1	0	19_GO:0022414 reproductive process	-10.189	12.1311	11.5972	27994	229	131	13	9.92366	2.6122	367|581|595|596|598|836|2099|3309|3383|5241|6647|7422|8648	AR|BAX|CCND1|BCL2|BCL2L1|CASP3|ESR1|HSPA5|ICAM1|PGR|SOD1|VEGFA|NCOA1	-8.47322	0	68	0	0	-10.3658	26.2432
GO Biological Processes	GO:0071347	cellular response to interleukin-1	19	-10.1653	M1	1	0	19_GO:0050896 response to stimulus	-10.1653	14.0128	12.1097	27994	183	131	12	9.16031	2.52033	1147|1244|3037|3091|3383|3551|3552|3553|3576|4792|5970|6347	CHUK|ABCC2|HAS2|HIF1A|ICAM1|IKBKB|IL1A|IL1B|CXCL8|NFKBIA|RELA|CCL2	-8.45234	0	7	0	0	-30.6555	19.8339
GO Biological Processes	GO:2001235	positive regulation of apoptotic signaling pathway	19	-10.1653	M1	1	0	19_GO:0048518 positive regulation of biological process	-10.1653	14.0128	12.1097	27994	183	131	12	9.16031	2.52033	581|596|598|841|857|1869|2932|4318|5599|6647|7124|7157	BAX|BCL2|BCL2L1|CASP8|CAV1|E2F1|GSK3B|MMP9|MAPK8|SOD1|TNF|TP53	-8.45234	0	53	0	0	-12.5473	42.7389
GO Biological Processes	GO:0051271	negative regulation of cellular component movement	19	-10.1578	M1	1	0	19_GO:0048519 negative regulation of biological process	-10.1578	8.54779	10.4253	27994	400	131	16	12.2137	2.8609	207|596|1281|1545|1800|1803|2697|2950|3162|3486|4780|5054|5467|5468|6347|7124	AKT1|BCL2|COL3A1|CYP1B1|DPEP1|DPP4|GJA1|GSTP1|HMOX1|IGFBP3|NFE2L2|SERPINE1|PPARD|PPARG|CCL2|TNF	-8.44698	0	64	0	0	-11.0201	28.1177
GO Biological Processes	GO:0006801	superoxide metabolic process	19	-10.1571	M1	1	0	19_GO:0008152 metabolic process	-10.1571	25.9899	14.7594	27994	74	131	9	6.87023	2.21001	1728|1956|2950|4353|4780|6647|7124|50506|653361	NQO1|EGFR|GSTP1|MPO|NFE2L2|SOD1|TNF|DUOX2|NCF1	-8.44698	0	41	0	0	-14.6448	41.0951
GO Biological Processes	GO:0046545	development of primary female sexual characteristics	19	-10.1525	M1	1	0	19_GO:0022414 reproductive process	-10.1525	20.3519	13.6222	27994	105	131	10	7.63359	2.31999	581|596|598|836|2099|3309|3383|5241|6647|7422	BAX|BCL2|BCL2L1|CASP3|ESR1|HSPA5|ICAM1|PGR|SOD1|VEGFA	-8.44384	0	68	0	0	-10.3658	26.2432
GO Biological Processes	GO:0007610	behavior	19	-10.1429	M1	1	0	19_GO:0007610 behavior	-10.1429	6.66699	9.69508	27994	609	131	19	14.5038	3.07666	153|596|836|1803|1812|1956|2353|2475|2697|3091|3725|5465|5594|5743|6532|6647|7157|8648|10499	ADRB1|BCL2|CASP3|DPP4|DRD1|EGFR|FOS|MTOR|GJA1|HIF1A|JUN|PPARA|MAPK1|PTGS2|SLC6A4|SOD1|TP53|NCOA1|NCOA2	-8.43563	0	70	1	1	-10.1429	15.2639
GO Biological Processes	GO:0046651	lymphocyte proliferation	19	-10.1232	M1	1	0	19_GO:0008283 cell proliferation	-10.1232	10.5342	11.0732	27994	284	131	14	10.687	2.69929	196|581|596|836|959|1026|2064|3481|3552|3553|3559|3572|7157|7412	AHR|BAX|BCL2|CASP3|CD40LG|CDKN1A|ERBB2|IGF2|IL1A|IL1B|IL2RA|IL6ST|TP53|VCAM1	-8.41726	0	20	0	0	-20.2541	16.3681
GO Biological Processes	GO:0052547	regulation of peptidase activity	19	-10.1046	M1	1	0	19_GO:0050789 regulation of biological process	-10.1046	7.74586	10.102	27994	469	131	17	12.9771	2.93609	207|581|841|842|857|1509|1800|2152|4318|4609|5054|5468|5743|5894|6590|7124|7422	AKT1|BAX|CASP8|CASP9|CAV1|CTSD|DPEP1|F3|MMP9|MYC|SERPINE1|PPARG|PTGS2|RAF1|SLPI|TNF|VEGFA	-8.40006	0	52	0	0	-12.6089	14.2463
GO Biological Processes	GO:0032943	mononuclear cell proliferation	19	-10.0629	M1	1	0	19_GO:0008283 cell proliferation	-10.0629	10.4241	11.0036	27994	287	131	14	10.687	2.69929	196|581|596|836|959|1026|2064|3481|3552|3553|3559|3572|7157|7412	AHR|BAX|BCL2|CASP3|CD40LG|CDKN1A|ERBB2|IGF2|IL1A|IL1B|IL2RA|IL6ST|TP53|VCAM1	-8.35977	0	20	0	0	-20.2541	16.3681
GO Biological Processes	GO:0007050	cell cycle arrest	19	-10.0493	M1	1	0	19_GO:0048519 negative regulation of biological process	-10.0493	11.8214	11.4225	27994	235	131	13	9.92366	2.6122	581|595|891|983|1017|1026|1869|2475|3458|3576|4609|5925|7157	BAX|CCND1|CCNB1|CDK1|CDK2|CDKN1A|E2F1|MTOR|IFNG|CXCL8|MYC|RB1|TP53	-8.34759	0	50	0	0	-12.7295	29.3306
GO Biological Processes	GO:0046902	regulation of mitochondrial membrane permeability	19	-9.99797	M1	1	0	19_GO:0071840 cellular component organization or biogenesis	-9.99797	24.9773	14.4463	27994	77	131	9	6.87023	2.21001	581|596|598|841|1869|2932|3099|5599|7157	BAX|BCL2|BCL2L1|CASP8|E2F1|GSK3B|HK2|MAPK8|TP53	-8.29763	0	53	0	0	-12.5473	42.7389
GO Biological Processes	GO:0040013	negative regulation of locomotion	19	-9.96891	M1	1	0	19_GO:0040011 locomotion	-9.96891	8.29882	10.2338	27994	412	131	16	12.2137	2.8609	207|596|1281|1545|1800|1803|2697|2950|3162|3486|4780|5054|5467|5468|6347|7124	AKT1|BCL2|COL3A1|CYP1B1|DPEP1|DPP4|GJA1|GSTP1|HMOX1|IGFBP3|NFE2L2|SERPINE1|PPARD|PPARG|CCL2|TNF	-8.26994	0	64	0	0	-11.0201	28.1177
GO Biological Processes	GO:0060627	regulation of vesicle-mediated transport	19	-9.95843	M1	1	0	19_GO:0051179 localization	-9.95843	6.99364	9.73408	27994	550	131	18	13.7405	3.00794	857|1129|1812|1950|2932|3162|3458|3553|5054|5468|5530|5579|5594|6347|6401|6647|7124|7422	CAV1|CHRM2|DRD1|EGF|GSK3B|HMOX1|IFNG|IL1B|SERPINE1|PPARG|PPP3CA|PRKCB|MAPK1|CCL2|SELE|SOD1|TNF|VEGFA	-8.26083	0	71	1	1	-9.95843	24.6571
GO Biological Processes	GO:0031649	heat generation	19	-9.95471	M1	1	0	19_GO:0032501 multicellular organismal process	-9.95471	75.4216	21.046	27994	17	131	6	4.58015	1.82652	153|154|3552|3553|5743|7124	ADRB1|ADRB2|IL1A|IL1B|PTGS2|TNF	-8.25848	0	11	0	0	-26.7386	213.695
GO Biological Processes	GO:0035265	organ growth	19	-9.94913	M1	1	0	19_GO:0040007 growth	-9.94913	13.4258	11.8153	27994	191	131	12	9.16031	2.52033	207|367|596|891|983|2099|2475|2697|5465|5594|6532|6647	AKT1|AR|BCL2|CCNB1|CDK1|ESR1|MTOR|GJA1|PPARA|MAPK1|SLC6A4|SOD1	-8.25426	0	63	0	0	-11.069	71.2316
GO Biological Processes	GO:0044057	regulation of system process	19	-9.9409	M1	1	0	19_GO:0032501 multicellular organismal process	-9.9409	6.48594	9.51838	27994	626	131	19	14.5038	3.07666	142|152|153|154|207|857|1129|1956|2475|2697|2946|3383|3553|3572|5465|5530|5578|5743|6647	PARP1|ADRA2C|ADRB1|ADRB2|AKT1|CAV1|CHRM2|EGFR|MTOR|GJA1|GSTM2|ICAM1|IL1B|IL6ST|PPARA|PPP3CA|PRKCA|PTGS2|SOD1	-8.24739	0	61	0	0	-11.228	26.7118
GO Biological Processes	GO:0043269	regulation of ion transport	19	-9.90071	M1	1	0	19_GO:0051179 localization	-9.90071	6.03657	9.3074	27994	708	131	20	15.2672	3.14246	154|207|581|596|760|857|1812|1950|2475|2697|2946|3383|3458|3553|3627|4318|5743|6347|6373|6532	ADRB2|AKT1|BAX|BCL2|CA2|CAV1|DRD1|EGF|MTOR|GJA1|GSTM2|ICAM1|IFNG|IL1B|CXCL10|MMP9|PTGS2|CCL2|CXCL11|SLC6A4	-8.20856	0	59	0	0	-11.5248	26.7118
GO Biological Processes	GO:0010821	regulation of mitochondrion organization	19	-9.84475	M1	1	0	19_GO:0071840 cellular component organization or biogenesis	-9.84475	13.1504	11.6746	27994	195	131	12	9.16031	2.52033	207|581|596|598|841|1869|2932|3091|3099|4318|5599|7157	AKT1|BAX|BCL2|BCL2L1|CASP8|E2F1|GSK3B|HIF1A|HK2|MMP9|MAPK8|TP53	-8.1553	0	53	0	0	-12.5473	42.7389
GO Biological Processes	GO:1905475	regulation of protein localization to membrane	19	-9.84475	M1	1	0	19_GO:0051179 localization	-9.84475	13.1504	11.6746	27994	195	131	12	9.16031	2.52033	207|367|596|598|841|1869|1956|2064|3458|5599|7124|7157	AKT1|AR|BCL2|BCL2L1|CASP8|E2F1|EGFR|ERBB2|IFNG|MAPK8|TNF|TP53	-8.1553	0	53	0	0	-12.5473	42.7389
GO Biological Processes	GO:0042445	hormone metabolic process	19	-9.82503	M1	1	0	19_GO:0008152 metabolic process	-9.82503	11.3389	11.145	27994	245	131	13	9.92366	2.6122	125|231|1543|1544|1545|1576|2099|3091|3458|3553|6696|7124|50506	ADH1B|AKR1B1|CYP1A1|CYP1A2|CYP1B1|CYP3A4|ESR1|HIF1A|IFNG|IL1B|SPP1|TNF|DUOX2	-8.13692	0	39	0	0	-14.9141	64.1084
GO Biological Processes	GO:0072594	establishment of protein localization to organelle	19	-9.79486	M1	1	0	19_GO:0051179 localization	-9.79486	6.83216	9.58537	27994	563	131	18	13.7405	3.00794	207|581|596|841|847|983|1026|1812|1869|3099|3309|3458|4792|5530|5594|5599|5743|7157	AKT1|BAX|BCL2|CASP8|CAT|CDK1|CDKN1A|DRD1|E2F1|HK2|HSPA5|IFNG|NFKBIA|PPP3CA|MAPK1|MAPK8|PTGS2|TP53	-8.10809	0	72	1	1	-9.79486	22.6646
GO Biological Processes	GO:0031098	stress-activated protein kinase signaling cascade	19	-9.77165	M1	1	0	19_GO:0023052 signaling	-9.77165	9.90637	10.6702	27994	302	131	14	10.687	2.69929	207|231|959|1147|1956|2950|3551|3553|4609|5594|5599|7124|7422|653361	AKT1|AKR1B1|CD40LG|CHUK|EGFR|GSTP1|IKBKB|IL1B|MYC|MAPK1|MAPK8|TNF|VEGFA|NCF1	-8.0863	0	35	0	0	-16.3031	20.6801
GO Biological Processes	GO:0016049	cell growth	19	-9.77041	M1	1	0	19_GO:0040007 growth	-9.77041	7.36878	9.78255	27994	493	131	17	12.9771	2.93609	207|596|1026|1956|2064|2100|2475|2697|2932|3486|5465|5467|5468|5925|6696|7157|7422	AKT1|BCL2|CDKN1A|EGFR|ERBB2|ESR2|MTOR|GJA1|GSK3B|IGFBP3|PPARA|PPARD|PPARG|RB1|SPP1|TP53|VEGFA	-8.0863	0	26	0	0	-18.934	11.7784
GO Biological Processes	GO:0031400	negative regulation of protein modification process	19	-9.76786	M1	1	0	19_GO:0048519 negative regulation of biological process	-9.76786	6.33416	9.36784	27994	641	131	19	14.5038	3.07666	207|581|836|857|891|1026|2475|2932|2950|3315|3458|3486|3551|3553|3725|4609|5925|5970|7124	AKT1|BAX|CASP3|CAV1|CCNB1|CDKN1A|MTOR|GSK3B|GSTP1|HSPB1|IFNG|IGFBP3|IKBKB|IL1B|JUN|MYC|RB1|RELA|TNF	-8.08507	0	56	0	0	-12.0768	11.5511
GO Biological Processes	GO:0045807	positive regulation of endocytosis	19	-9.75616	M1	1	0	19_GO:0048518 positive regulation of biological process	-9.75616	15.2639	12.1706	27994	154	131	11	8.39695	2.42315	1950|3458|3553|5054|5468|5530|6347|6401|6647|7124|7422	EGF|IFNG|IL1B|SERPINE1|PPARG|PPP3CA|CCL2|SELE|SOD1|TNF|VEGFA	-8.0747	0	71	0	0	-9.95843	24.6571
GO Biological Processes	GO:1903036	positive regulation of response to wounding	19	-9.69911	M1	1	0	19_GO:0048518 positive regulation of biological process	-9.69911	23.1717	13.8707	27994	83	131	9	6.87023	2.21001	2152|2155|2475|4780|5054|5321|5467|7056|50506	F3|F7|MTOR|NFE2L2|SERPINE1|PLA2G4A|PPARD|THBD|DUOX2	-8.01897	0	3	0	0	-33.9492	45.7917
GO Biological Processes	GO:0042133	neurotransmitter metabolic process	19	-9.69586	M1	1	0	19_GO:0008152 metabolic process	-9.69586	15.0682	12.0817	27994	156	131	11	8.39695	2.42315	207|857|1545|1728|2475|3383|3458|3553|5743|6532|7124	AKT1|CAV1|CYP1B1|NQO1|MTOR|ICAM1|IFNG|IL1B|PTGS2|SLC6A4|TNF	-8.01703	0	11	0	0	-26.7386	213.695
GO Biological Processes	GO:0045907	positive regulation of vasoconstriction	19	-9.69381	M1	1	0	19_GO:0048518 positive regulation of biological process	-9.69381	43.996	17.2007	27994	34	131	7	5.34351	1.96496	152|207|857|1956|2697|3383|5743	ADRA2C|AKT1|CAV1|EGFR|GJA1|ICAM1|PTGS2	-8.01629	0	36	0	0	-16.0134	50.2811
GO Biological Processes	GO:0018107	peptidyl-threonine phosphorylation	19	-9.68283	M1	1	0	19_GO:0008152 metabolic process	-9.68283	18.2645	12.8313	27994	117	131	10	7.63359	2.31999	207|596|983|1950|2475|2932|5578|5579|5594|5599	AKT1|BCL2|CDK1|EGF|MTOR|GSK3B|PRKCA|PRKCB|MAPK1|MAPK8	-8.00723	0	38	0	0	-14.9727	18.9951
GO Biological Processes	GO:0019216	regulation of lipid metabolic process	19	-9.68214	M1	1	0	19_GO:0050789 regulation of biological process	-9.68214	7.93298	9.94585	27994	431	131	16	12.2137	2.8609	207|857|1543|2194|2475|3458|3553|5465|5467|5468|5743|5925|6647|7124|8648|10499	AKT1|CAV1|CYP1A1|FASN|MTOR|IFNG|IL1B|PPARA|PPARD|PPARG|PTGS2|RB1|SOD1|TNF|NCOA1|NCOA2	-8.00723	0	73	1	1	-9.68214	64.1084
GO Biological Processes	GO:0008610	lipid biosynthetic process	19	-9.63707	M1	1	0	19_GO:0008152 metabolic process	-9.63707	5.83069	9.08733	27994	733	131	20	15.2672	3.14246	207|231|240|1543|1544|1576|2194|2475|2944|2946|2950|3458|3553|4048|5321|5467|5742|5743|6647|7124	AKT1|AKR1B1|ALOX5|CYP1A1|CYP1A2|CYP3A4|FASN|MTOR|GSTM1|GSTM2|GSTP1|IFNG|IL1B|LTA4H|PLA2G4A|PPARD|PTGS1|PTGS2|SOD1|TNF	-7.96346	0	32	0	0	-17.2246	56.5662
GO Biological Processes	GO:0060749	mammary gland alveolus development	19	-9.61713	M1	1	0	19_GO:0032502 developmental process	-9.61713	67.4825	19.8768	27994	19	131	6	4.58015	1.82652	367|595|1950|2099|3091|7422	AR|CCND1|EGF|ESR1|HIF1A|VEGFA	-7.94611	0	31	0	0	-18.0915	106.847
GO Biological Processes	GO:0061377	mammary gland lobule development	19	-9.61713	M1	1	0	19_GO:0032502 developmental process	-9.61713	67.4825	19.8768	27994	19	131	6	4.58015	1.82652	367|595|1950|2099|3091|7422	AR|CCND1|EGF|ESR1|HIF1A|VEGFA	-7.94611	0	31	0	0	-18.0915	106.847
GO Biological Processes	GO:0046660	female sex differentiation	19	-9.60968	M1	1	0	19_GO:0022414 reproductive process	-9.60968	17.9575	12.7109	27994	119	131	10	7.63359	2.31999	581|596|598|836|2099|3309|3383|5241|6647|7422	BAX|BCL2|BCL2L1|CASP3|ESR1|HSPA5|ICAM1|PGR|SOD1|VEGFA	-7.93994	0	68	0	0	-10.3658	26.2432
GO Biological Processes	GO:0030168	platelet activation	19	-9.60697	M1	1	0	19_GO:0032501 multicellular organismal process	-9.60697	14.7839	11.9515	27994	159	131	11	8.39695	2.42315	152|959|1277|1281|3315|5321|5578|5579|5594|5894|7056	ADRA2C|CD40LG|COL1A1|COL3A1|HSPB1|PLA2G4A|PRKCA|PRKCB|MAPK1|RAF1|THBD	-7.93852	0	3	0	0	-33.9492	45.7917
GO Biological Processes	GO:1901030	positive regulation of mitochondrial outer membrane permeabilization involved in apoptotic signaling pathway	19	-9.59858	M1	1	0	19_GO:0048518 positive regulation of biological process	-9.59858	42.7389	16.9419	27994	35	131	7	5.34351	1.96496	581|596|841|1869|2932|5599|7157	BAX|BCL2|CASP8|E2F1|GSK3B|MAPK8|TP53	-7.93181	0	53	0	0	-12.5473	42.7389
GO Biological Processes	GO:0042743	hydrogen peroxide metabolic process	19	-9.59771	M1	1	0	19_GO:0008152 metabolic process	-9.59771	29.9922	15.0237	27994	57	131	8	6.10687	2.09214	847|1543|1544|1956|4314|4353|6647|50506	CAT|CYP1A1|CYP1A2|EGFR|MMP3|MPO|SOD1|DUOX2	-7.93181	0	43	0	0	-14.0637	50.2811
GO Biological Processes	GO:0052548	regulation of endopeptidase activity	19	-9.59455	M1	1	0	19_GO:0050789 regulation of biological process	-9.59455	7.82406	9.85857	27994	437	131	16	12.2137	2.8609	207|581|841|842|1509|1800|2152|4318|4609|5054|5468|5743|5894|6590|7124|7422	AKT1|BAX|CASP8|CASP9|CTSD|DPEP1|F3|MMP9|MYC|SERPINE1|PPARG|PTGS2|RAF1|SLPI|TNF|VEGFA	-7.92992	0	52	0	0	-12.6089	14.2463
GO Biological Processes	GO:0090257	regulation of muscle system process	19	-9.58972	M1	1	0	19_GO:0032501 multicellular organismal process	-9.58972	10.8517	10.8577	27994	256	131	13	9.92366	2.6122	142|152|154|857|1129|2475|2946|3572|5465|5530|5578|5743|6647	PARP1|ADRA2C|ADRB2|CAV1|CHRM2|MTOR|GSTM2|IL6ST|PPARA|PPP3CA|PRKCA|PTGS2|SOD1	-7.92635	0	61	0	0	-11.228	26.7118
GO Biological Processes	GO:0060326	cell chemotaxis	19	-9.58632	M1	1	0	19_GO:0040011 locomotion	-9.58632	9.58886	10.4607	27994	312	131	14	10.687	2.69929	240|1800|1803|2155|2950|3315|3553|3576|3627|5054|5594|6347|6373|7422	ALOX5|DPEP1|DPP4|F7|GSTP1|HSPB1|IL1B|CXCL8|CXCL10|SERPINE1|MAPK1|CCL2|CXCL11|VEGFA	-7.92422	0	42	0	0	-14.4051	14.5229
GO Biological Processes	GO:0051092	positive regulation of NF-kappaB transcription factor activity	19	-9.57775	M1	1	0	19_GO:0048518 positive regulation of biological process	-9.57775	14.6915	11.9089	27994	160	131	11	8.39695	2.42315	367|847|857|959|1147|3383|3551|3553|5579|5970|7124	AR|CAT|CAV1|CD40LG|CHUK|ICAM1|IKBKB|IL1B|PRKCB|RELA|TNF	-7.91691	0	24	0	0	-19.0213	42.7389
GO Biological Processes	GO:0010822	positive regulation of mitochondrion organization	19	-9.5736	M1	1	0	19_GO:0048518 positive regulation of biological process	-9.5736	17.8079	12.6517	27994	120	131	10	7.63359	2.31999	581|596|841|1869|2932|3091|3099|4318|5599|7157	BAX|BCL2|CASP8|E2F1|GSK3B|HIF1A|HK2|MMP9|MAPK8|TP53	-7.91402	0	53	0	0	-12.5473	42.7389
GO Biological Processes	GO:0030072	peptide hormone secretion	19	-9.56888	M1	1	0	19_GO:0023052 signaling	-9.56888	10.8095	10.8325	27994	257	131	13	9.92366	2.6122	152|240|1803|1956|2697|3091|3458|3553|5467|5530|5578|5894|7124	ADRA2C|ALOX5|DPP4|EGFR|GJA1|HIF1A|IFNG|IL1B|PPARD|PPP3CA|PRKCA|RAF1|TNF	-7.91056	0	40	0	0	-14.7066	12.987
GO Biological Processes	GO:0099536	synaptic signaling	19	-9.55493	M1	1	0	19_GO:0023052 signaling	-9.55493	5.76774	9.01905	27994	741	131	20	15.2672	3.14246	154|207|760|1129|1728|1812|1956|2475|2932|3553|5327|5530|5579|5594|5743|5970|6347|6530|6532|7124	ADRB2|AKT1|CA2|CHRM2|NQO1|DRD1|EGFR|MTOR|GSK3B|IL1B|PLAT|PPP3CA|PRKCB|MAPK1|PTGS2|RELA|CCL2|SLC6A2|SLC6A4|TNF	-7.89785	0	74	1	1	-9.55493	26.7118
GO Biological Processes	GO:1902107	positive regulation of leukocyte differentiation	19	-9.54873	M1	1	0	19_GO:0002376 immune system process	-9.54873	14.6003	11.8666	27994	161	131	11	8.39695	2.42315	760|841|2353|3458|3552|3553|3559|3725|5578|5925|7124	CA2|CASP8|FOS|IFNG|IL1A|IL1B|IL2RA|JUN|PRKCA|RB1|TNF	-7.8929	0	30	0	0	-18.3881	31.6585
GO Biological Processes	GO:0002763	positive regulation of myeloid leukocyte differentiation	19	-9.53495	M1	1	0	19_GO:0002376 immune system process	-9.53495	29.4751	14.8848	27994	58	131	8	6.10687	2.09214	760|841|2353|3458|3725|5578|5925|7124	CA2|CASP8|FOS|IFNG|JUN|PRKCA|RB1|TNF	-7.88036	0	30	0	0	-18.3881	31.6585
GO Biological Processes	GO:1904705	regulation of vascular smooth muscle cell proliferation	19	-9.51268	M1	1	0	19_GO:0008283 cell proliferation	-9.51268	22.1063	13.5196	27994	87	131	9	6.87023	2.21001	1026|2697|2950|3162|3725|4313|4318|5468|7124	CDKN1A|GJA1|GSTP1|HMOX1|JUN|MMP2|MMP9|PPARG|TNF	-7.86057	0	21	0	0	-19.9812	24.8965
GO Biological Processes	GO:1990874	vascular smooth muscle cell proliferation	19	-9.51268	M1	1	0	19_GO:0008283 cell proliferation	-9.51268	22.1063	13.5196	27994	87	131	9	6.87023	2.21001	1026|2697|2950|3162|3725|4313|4318|5468|7124	CDKN1A|GJA1|GSTP1|HMOX1|JUN|MMP2|MMP9|PPARG|TNF	-7.86057	0	21	0	0	-19.9812	24.8965
GO Biological Processes	GO:0006066	alcohol metabolic process	19	-9.48337	M1	1	0	19_GO:0008152 metabolic process	-9.48337	8.45757	10.0228	27994	379	131	15	11.4504	2.78207	125|231|847|1543|1544|1545|1576|2194|3458|3553|5321|5444|5467|6647|7124	ADH1B|AKR1B1|CAT|CYP1A1|CYP1A2|CYP1B1|CYP3A4|FASN|IFNG|IL1B|PLA2G4A|PON1|PPARD|SOD1|TNF	-7.83371	0	39	0	0	-14.9141	64.1084
GO Biological Processes	GO:0045862	positive regulation of proteolysis	19	-9.48337	M1	1	0	19_GO:0048518 positive regulation of biological process	-9.48337	8.45757	10.0228	27994	379	131	15	11.4504	2.78207	207|581|841|842|857|1509|1950|2152|2932|3458|3553|4609|4780|5468|7124	AKT1|BAX|CASP8|CASP9|CAV1|CTSD|EGF|F3|GSK3B|IFNG|IL1B|MYC|NFE2L2|PPARG|TNF	-7.83371	0	52	0	0	-12.6089	14.2463
GO Biological Processes	GO:0006636	unsaturated fatty acid biosynthetic process	19	-9.47337	M1	1	0	19_GO:0008152 metabolic process	-9.47337	28.9755	14.7495	27994	59	131	8	6.10687	2.09214	240|2944|2946|2950|3553|5321|5742|5743	ALOX5|GSTM1|GSTM2|GSTP1|IL1B|PLA2G4A|PTGS1|PTGS2	-7.82608	0	32	0	0	-17.2246	56.5662
GO Biological Processes	GO:0006109	regulation of carbohydrate metabolic process	19	-9.47329	M1	1	0	19_GO:0050789 regulation of biological process	-9.47329	12.2111	11.1817	27994	210	131	12	9.16031	2.52033	207|1950|2475|2932|3037|3091|3458|3481|3486|5465|7157|10499	AKT1|EGF|MTOR|GSK3B|HAS2|HIF1A|IFNG|IGF2|IGFBP3|PPARA|TP53|NCOA2	-7.82608	0	29	0	0	-18.4437	33.7413
GO Biological Processes	GO:0002761	regulation of myeloid leukocyte differentiation	19	-9.4673	M1	1	0	19_GO:0002376 immune system process	-9.4673	17.3735	12.4786	27994	123	131	10	7.63359	2.31999	760|841|2353|2475|3458|3725|4609|5578|5925|7124	CA2|CASP8|FOS|MTOR|IFNG|JUN|MYC|PRKCA|RB1|TNF	-7.82131	0	30	0	0	-18.3881	31.6585
GO Biological Processes	GO:0046879	hormone secretion	19	-9.42511	M1	1	0	19_GO:0023052 signaling	-9.42511	9.32002	10.28	27994	321	131	14	10.687	2.69929	152|240|1803|1956|2697|3091|3458|3553|5467|5530|5578|5894|6696|7124	ADRA2C|ALOX5|DPP4|EGFR|GJA1|HIF1A|IFNG|IL1B|PPARD|PPP3CA|PRKCA|RAF1|SPP1|TNF	-7.78034	0	40	0	0	-14.7066	12.987
GO Biological Processes	GO:0097755	positive regulation of blood vessel diameter	19	-9.41292	M1	1	0	19_GO:0032501 multicellular organismal process	-9.41292	28.4926	14.6175	27994	60	131	8	6.10687	2.09214	153|154|1812|1956|2697|3162|5467|6647	ADRB1|ADRB2|DRD1|EGFR|GJA1|HMOX1|PPARD|SOD1	-7.76936	0	36	0	0	-16.0134	50.2811
GO Biological Processes	GO:0030073	insulin secretion	19	-9.4025	M1	1	0	19_GO:0023052 signaling	-9.4025	12.0391	11.0891	27994	213	131	12	9.16031	2.52033	152|240|1803|2697|3091|3458|3553|5467|5530|5578|5894|7124	ADRA2C|ALOX5|DPP4|GJA1|HIF1A|IFNG|IL1B|PPARD|PPP3CA|PRKCA|RAF1|TNF	-7.76135	0	40	0	0	-14.7066	12.987
GO Biological Processes	GO:0090276	regulation of peptide hormone secretion	19	-9.4025	M1	1	0	19_GO:0023052 signaling	-9.4025	12.0391	11.0891	27994	213	131	12	9.16031	2.52033	152|240|1803|1956|2697|3091|3458|3553|5467|5530|5578|7124	ADRA2C|ALOX5|DPP4|EGFR|GJA1|HIF1A|IFNG|IL1B|PPARD|PPP3CA|PRKCA|TNF	-7.76135	0	40	0	0	-14.7066	12.987
GO Biological Processes	GO:0050870	positive regulation of T cell activation	19	-9.37915	M1	1	0	19_GO:0022610 biological adhesion	-9.37915	11.9829	11.0587	27994	214	131	12	9.16031	2.52033	207|857|959|1803|3458|3481|3552|3553|3559|3572|6347|7412	AKT1|CAV1|CD40LG|DPP4|IFNG|IGF2|IL1A|IL1B|IL2RA|IL6ST|CCL2|VCAM1	-7.73988	0	20	0	0	-20.2541	16.3681
GO Biological Processes	GO:0009408	response to heat	19	-9.37863	M1	1	0	19_GO:0050896 response to stimulus	-9.37863	14.0757	11.6208	27994	167	131	11	8.39695	2.42315	207|1026|1244|2475|2932|3162|3552|3627|5594|5743|6647	AKT1|CDKN1A|ABCC2|MTOR|GSK3B|HMOX1|IL1A|CXCL10|MAPK1|PTGS2|SOD1	-7.73988	0	38	0	0	-14.9727	18.9951
GO Biological Processes	GO:0018210	peptidyl-threonine modification	19	-9.36379	M1	1	0	19_GO:0008152 metabolic process	-9.36379	16.9599	12.3114	27994	126	131	10	7.63359	2.31999	207|596|983|1950|2475|2932|5578|5579|5594|5599	AKT1|BCL2|CDK1|EGF|MTOR|GSK3B|PRKCA|PRKCB|MAPK1|MAPK8	-7.72623	0	38	0	0	-14.9727	18.9951
GO Biological Processes	GO:0050804	modulation of chemical synaptic transmission	19	-9.35364	M1	1	0	19_GO:0023052 signaling	-9.35364	7.53109	9.62007	27994	454	131	16	12.2137	2.8609	154|760|1129|1812|1956|2475|2932|3553|5327|5530|5579|5594|5743|6347|6532|7124	ADRB2|CA2|CHRM2|DRD1|EGFR|MTOR|GSK3B|IL1B|PLAT|PPP3CA|PRKCB|MAPK1|PTGS2|CCL2|SLC6A4|TNF	-7.71728	0	74	0	0	-9.55493	26.7118
GO Biological Processes	GO:0015850	organic hydroxy compound transport	19	-9.34547	M1	1	0	19_GO:0051179 localization	-9.34547	10.3658	10.5637	27994	268	131	13	9.92366	2.6122	152|857|1244|1812|1950|4792|5444|5468|6530|6532|6696|8648|10499	ADRA2C|CAV1|ABCC2|DRD1|EGF|NFKBIA|PON1|PPARG|SLC6A2|SLC6A4|SPP1|NCOA1|NCOA2	-7.7103	0	75	1	1	-9.34547	32.0542
GO Biological Processes	GO:0099177	regulation of trans-synaptic signaling	19	-9.33979	M1	1	0	19_GO:0023052 signaling	-9.33979	7.51454	9.60642	27994	455	131	16	12.2137	2.8609	154|760|1129|1812|1956|2475|2932|3553|5327|5530|5579|5594|5743|6347|6532|7124	ADRB2|CA2|CHRM2|DRD1|EGFR|MTOR|GSK3B|IL1B|PLAT|PPP3CA|PRKCB|MAPK1|PTGS2|CCL2|SLC6A4|TNF	-7.7058	0	74	0	0	-9.55493	26.7118
GO Biological Processes	GO:1905477	positive regulation of protein localization to membrane	19	-9.32988	M1	1	0	19_GO:0048518 positive regulation of biological process	-9.32988	16.8264	12.257	27994	127	131	10	7.63359	2.31999	207|596|841|1869|1956|2064|3458|5599|7124|7157	AKT1|BCL2|CASP8|E2F1|EGFR|ERBB2|IFNG|MAPK8|TNF|TP53	-7.69707	0	53	0	0	-12.5473	42.7389
GO Biological Processes	GO:1905952	regulation of lipid localization	19	-9.29608	M1	1	0	19_GO:0051179 localization	-9.29608	13.8273	11.5026	27994	170	131	11	8.39695	2.42315	207|857|1950|3553|4792|5444|5465|5467|5468|6696|7124	AKT1|CAV1|EGF|IL1B|NFKBIA|PON1|PPARA|PPARD|PPARG|SPP1|TNF	-7.66444	0	75	0	0	-9.34547	32.0542
GO Biological Processes	GO:1900407	regulation of cellular response to oxidative stress	19	-9.29236	M1	1	0	19_GO:0050896 response to stimulus	-9.29236	20.9049	13.1124	27994	92	131	9	6.87023	2.21001	142|207|240|3091|3315|4314|4780|6647|7124	PARP1|AKT1|ALOX5|HIF1A|HSPB1|MMP3|NFE2L2|SOD1|TNF	-7.66191	0	33	0	0	-17.1314	47.4877
GO Biological Processes	GO:0050670	regulation of lymphocyte proliferation	19	-9.26417	M1	1	0	19_GO:0008283 cell proliferation	-9.26417	11.7093	10.9094	27994	219	131	12	9.16031	2.52033	196|596|836|959|1026|2064|3481|3552|3553|3559|3572|7412	AHR|BCL2|CASP3|CD40LG|CDKN1A|ERBB2|IGF2|IL1A|IL1B|IL2RA|IL6ST|VCAM1	-7.63489	0	20	0	0	-20.2541	16.3681
GO Biological Processes	GO:0001655	urogenital system development	19	-9.25182	M1	1	0	19_GO:0032502 developmental process	-9.25182	9.03844	10.0875	27994	331	131	14	10.687	2.69929	231|367|581|596|760|842|847|2099|3037|4318|4609|4953|6772|7422	AKR1B1|AR|BAX|BCL2|CA2|CASP9|CAT|ESR1|HAS2|MMP9|MYC|ODC1|STAT1|VEGFA	-7.62488	0	76	1	1	-9.25182	28.1177
GO Biological Processes	GO:0032147	activation of protein kinase activity	19	-9.25182	M1	1	0	19_GO:0048518 positive regulation of biological process	-9.25182	9.03844	10.0875	27994	331	131	14	10.687	2.69929	152|154|207|959|983|1950|1956|2475|3553|5594|5894|6647|7124|7422	ADRA2C|ADRB2|AKT1|CD40LG|CDK1|EGF|EGFR|MTOR|IL1B|MAPK1|RAF1|SOD1|TNF|VEGFA	-7.62488	0	35	0	0	-16.3031	20.6801
GO Biological Processes	GO:0014909	smooth muscle cell migration	19	-9.24987	M1	1	0	19_GO:0040011 locomotion	-9.24987	20.6801	13.0348	27994	93	131	9	6.87023	2.21001	596|2950|3037|3486|4780|5054|5327|5328|5467	BCL2|GSTP1|HAS2|IGFBP3|NFE2L2|SERPINE1|PLAT|PLAU|PPARD	-7.62408	0	64	0	0	-11.0201	28.1177
GO Biological Processes	GO:0030856	regulation of epithelial cell differentiation	19	-9.24192	M1	1	0	19_GO:0032502 developmental process	-9.24192	13.6665	11.4255	27994	172	131	11	8.39695	2.42315	595|857|2932|3458|3551|3553|4318|5054|6772|7124|7422	CCND1|CAV1|GSK3B|IFNG|IKBKB|IL1B|MMP9|SERPINE1|STAT1|TNF|VEGFA	-7.61729	0	77	1	1	-9.24192	27.7012
GO Biological Processes	GO:0031571	mitotic G1 DNA damage checkpoint	19	-9.23798	M1	1	0	19_GO:0048519 negative regulation of biological process	-9.23798	27.1358	14.24	27994	63	131	8	6.10687	2.09214	581|595|891|983|1017|1026|1869|7157	BAX|CCND1|CCNB1|CDK1|CDK2|CDKN1A|E2F1|TP53	-7.61451	0	50	0	0	-12.7295	29.3306
GO Biological Processes	GO:0071375	cellular response to peptide hormone stimulus	19	-9.23482	M1	1	0	19_GO:0050896 response to stimulus	-9.23482	9.01122	10.0687	27994	332	131	14	10.687	2.69929	142|207|760|857|2932|2950|3481|3553|3645|4780|5468|5579|5970|6772	PARP1|AKT1|CA2|CAV1|GSK3B|GSTP1|IGF2|IL1B|INSRR|NFE2L2|PPARG|PRKCB|RELA|STAT1	-7.6125	0	6	0	0	-32.439	12.8345
GO Biological Processes	GO:0046883	regulation of hormone secretion	19	-9.22787	M1	1	0	19_GO:0023052 signaling	-9.22787	10.1388	10.4235	27994	274	131	13	9.92366	2.6122	152|240|1803|1956|2697|3091|3458|3553|5467|5530|5578|6696|7124	ADRA2C|ALOX5|DPP4|EGFR|GJA1|HIF1A|IFNG|IL1B|PPARD|PPP3CA|PRKCA|SPP1|TNF	-7.6067	0	40	0	0	-14.7066	12.987
GO Biological Processes	GO:0010959	regulation of metal ion transport	19	-9.22116	M1	1	0	19_GO:0051179 localization	-9.22116	8.09449	9.74937	27994	396	131	15	11.4504	2.78207	154|207|581|596|857|1812|1950|2697|2946|3383|3458|3627|5743|6347|6373	ADRB2|AKT1|BAX|BCL2|CAV1|DRD1|EGF|GJA1|GSTM2|ICAM1|IFNG|CXCL10|PTGS2|CCL2|CXCL11	-7.60115	0	59	0	0	-11.5248	26.7118
GO Biological Processes	GO:0032944	regulation of mononuclear cell proliferation	19	-9.21899	M1	1	0	19_GO:0008283 cell proliferation	-9.21899	11.6033	10.8511	27994	221	131	12	9.16031	2.52033	196|596|836|959|1026|2064|3481|3552|3553|3559|3572|7412	AHR|BCL2|CASP3|CD40LG|CDKN1A|ERBB2|IGF2|IL1A|IL1B|IL2RA|IL6ST|VCAM1	-7.60011	0	20	0	0	-20.2541	16.3681
GO Biological Processes	GO:0001659	temperature homeostasis	19	-9.18845	M1	1	0	19_GO:0032501 multicellular organismal process	-9.18845	13.5094	11.3496	27994	174	131	11	8.39695	2.42315	153|154|857|1812|2697|3552|3553|5743|5925|7124|7422	ADRB1|ADRB2|CAV1|DRD1|GJA1|IL1A|IL1B|PTGS2|RB1|TNF|VEGFA	-7.57072	0	11	0	0	-26.7386	213.695
GO Biological Processes	GO:0055093	response to hyperoxia	19	-9.1828	M1	1	0	19_GO:0050896 response to stimulus	-9.1828	58.2804	18.429	27994	22	131	6	4.58015	1.82652	847|857|1026|1277|1543|5468	CAT|CAV1|CDKN1A|COL1A1|CYP1A1|PPARG	-7.56736	0	78	1	1	-9.1828	77.7071
GO Biological Processes	GO:0044783	G1 DNA damage checkpoint	19	-9.18169	M1	1	0	19_GO:0048519 negative regulation of biological process	-9.18169	26.7118	14.12	27994	64	131	8	6.10687	2.09214	581|595|891|983|1017|1026|1869|7157	BAX|CCND1|CCNB1|CDK1|CDK2|CDKN1A|E2F1|TP53	-7.56736	0	50	0	0	-12.7295	29.3306
GO Biological Processes	GO:0044819	mitotic G1/S transition checkpoint	19	-9.18169	M1	1	0	19_GO:0048519 negative regulation of biological process	-9.18169	26.7118	14.12	27994	64	131	8	6.10687	2.09214	581|595|891|983|1017|1026|1869|7157	BAX|CCND1|CCNB1|CDK1|CDK2|CDKN1A|E2F1|TP53	-7.56736	0	50	0	0	-12.7295	29.3306
GO Biological Processes	GO:0034504	protein localization to nucleus	19	-9.17013	M1	1	0	19_GO:0051179 localization	-9.17013	10.029	10.3551	27994	277	131	13	9.92366	2.6122	142|207|983|1026|1277|1812|2932|3458|4792|5530|5594|5743|7157	PARP1|AKT1|CDK1|CDKN1A|COL1A1|DRD1|GSK3B|IFNG|NFKBIA|PPP3CA|MAPK1|PTGS2|TP53	-7.55694	0	72	0	0	-9.79486	22.6646
GO Biological Processes	GO:0016572	histone phosphorylation	19	-9.16414	M1	1	0	19_GO:0071840 cellular component organization or biogenesis	-9.16414	37.3966	15.7948	27994	40	131	7	5.34351	1.96496	891|983|1017|1812|3553|5578|5579	CCNB1|CDK1|CDK2|DRD1|IL1B|PRKCA|PRKCB	-7.55207	0	63	0	0	-11.069	71.2316
GO Biological Processes	GO:0015980	energy derivation by oxidation of organic compounds	19	-9.15104	M1	1	0	19_GO:0008152 metabolic process	-9.15104	9.99292	10.3325	27994	278	131	13	9.92366	2.6122	207|847|891|983|1544|2475|2932|3091|3458|3481|3572|4609|7157	AKT1|CAT|CCNB1|CDK1|CYP1A2|MTOR|GSK3B|HIF1A|IFNG|IGF2|IL6ST|MYC|TP53	-7.5401	0	29	0	0	-18.4437	33.7413
GO Biological Processes	GO:0032768	regulation of monooxygenase activity	19	-9.12635	M1	1	0	19_GO:0050789 regulation of biological process	-9.12635	26.3009	14.0027	27994	65	131	8	6.10687	2.09214	207|857|1956|3091|3458|3552|3553|7124	AKT1|CAV1|EGFR|HIF1A|IFNG|IL1A|IL1B|TNF	-7.51659	0	11	0	0	-26.7386	213.695
GO Biological Processes	GO:1903035	negative regulation of response to wounding	19	-9.1253	M1	1	0	19_GO:0048519 negative regulation of biological process	-9.1253	20.0339	12.8092	27994	96	131	9	6.87023	2.21001	240|1026|2697|5054|5327|5328|6696|7056|7124	ALOX5|CDKN1A|GJA1|SERPINE1|PLAT|PLAU|SPP1|THBD|TNF	-7.51659	0	46	0	0	-13.366	32.8761
GO Biological Processes	GO:0007548	sex differentiation	19	-9.09423	M1	1	0	19_GO:0022414 reproductive process	-9.09423	9.88623	10.2654	27994	281	131	13	9.92366	2.6122	367|581|595|596|598|836|2099|3309|3383|5241|6647|7422|8648	AR|BAX|CCND1|BCL2|BCL2L1|CASP3|ESR1|HSPA5|ICAM1|PGR|SOD1|VEGFA|NCOA1	-7.48664	0	68	0	0	-10.3658	26.2432
GO Biological Processes	GO:1902042	negative regulation of extrinsic apoptotic signaling pathway via death domain receptors	19	-9.08452	M1	1	0	19_GO:0048519 negative regulation of biological process	-9.08452	36.4845	15.5906	27994	41	131	7	5.34351	1.96496	598|841|2932|3162|3383|5054|5894	BCL2L1|CASP8|GSK3B|HMOX1|ICAM1|SERPINE1|RAF1	-7.47895	0	8	0	0	-28.7104	36.4845
GO Biological Processes	GO:0045930	negative regulation of mitotic cell cycle	19	-9.08432	M1	1	0	19_GO:0048519 negative regulation of biological process	-9.08432	8.77339	9.90291	27994	341	131	14	10.687	2.69929	581|595|596|598|891|983|1017|1026|1869|1956|5925|6347|7124|7157	BAX|CCND1|BCL2|BCL2L1|CCNB1|CDK1|CDK2|CDKN1A|E2F1|EGFR|RB1|CCL2|TNF|TP53	-7.47895	0	50	0	0	-12.7295	29.3306
GO Biological Processes	GO:0002696	positive regulation of leukocyte activation	19	-9.07282	M1	1	0	19_GO:0002376 immune system process	-9.07282	7.89512	9.59602	27994	406	131	15	11.4504	2.78207	207|596|857|959|1026|1803|3458|3481|3552|3553|3559|3572|5321|6347|7412	AKT1|BCL2|CAV1|CD40LG|CDKN1A|DPP4|IFNG|IGF2|IL1A|IL1B|IL2RA|IL6ST|PLA2G4A|CCL2|VCAM1	-7.46855	0	20	0	0	-20.2541	16.3681
GO Biological Processes	GO:0048469	cell maturation	19	-9.05767	M1	1	0	19_GO:0032502 developmental process	-9.05767	13.1321	11.1653	27994	179	131	11	8.39695	2.42315	231|596|860|891|1026|2475|3091|5241|5468|5925|7422	AKR1B1|BCL2|RUNX2|CCNB1|CDKN1A|MTOR|HIF1A|PGR|PPARG|RB1|VEGFA	-7.45451	0	51	0	0	-12.6756	53.4237
GO Biological Processes	GO:1901522	positive regulation of transcription from RNA polymerase II promoter involved in cellular response to chemical stimulus	19	-9.05318	M1	1	0	19_GO:0048518 positive regulation of biological process	-9.05318	55.7464	18.0099	27994	23	131	6	4.58015	1.82652	860|3091|4780|5970|7157|7422	RUNX2|HIF1A|NFE2L2|RELA|TP53|VEGFA	-7.45112	0	79	1	1	-9.05318	142.463
GO Biological Processes	GO:0036473	cell death in response to oxidative stress	19	-9.04459	M1	1	0	19_GO:0050896 response to stimulus	-9.04459	19.625	12.6644	27994	98	131	9	6.87023	2.21001	142|207|596|1545|3091|3315|4314|4780|6647	PARP1|AKT1|BCL2|CYP1B1|HIF1A|HSPB1|MMP3|NFE2L2|SOD1	-7.44362	0	33	0	0	-17.1314	47.4877
GO Biological Processes	GO:0050796	regulation of insulin secretion	19	-9.00648	M1	1	0	19_GO:0023052 signaling	-9.00648	12.987	11.0936	27994	181	131	11	8.39695	2.42315	152|240|1803|2697|3091|3458|3553|5467|5530|5578|7124	ADRA2C|ALOX5|DPP4|GJA1|HIF1A|IFNG|IL1B|PPARD|PPP3CA|PRKCA|TNF	-7.40661	0	40	0	0	-14.7066	12.987
GO Biological Processes	GO:0005975	carbohydrate metabolic process	19	-9.00518	M1	1	0	19_GO:0008152 metabolic process	-9.00518	6.09589	8.87767	27994	631	131	18	13.7405	3.00794	207|231|1950|2475|2932|3037|3091|3099|3458|3481|3486|3572|5321|5465|5467|7124|7157|10499	AKT1|AKR1B1|EGF|MTOR|GSK3B|HAS2|HIF1A|HK2|IFNG|IGF2|IGFBP3|IL6ST|PLA2G4A|PPARA|PPARD|TNF|TP53|NCOA2	-7.40641	0	29	0	0	-18.4437	33.7413
GO Biological Processes	GO:0001894	tissue homeostasis	19	-8.99965	M1	1	0	19_GO:0032501 multicellular organismal process	-8.99965	11.101	10.5702	27994	231	131	12	9.16031	2.52033	154|231|581|596|760|1956|3315|5578|5925|6647|6696|7422	ADRB2|AKR1B1|BAX|BCL2|CA2|EGFR|HSPB1|PRKCA|RB1|SOD1|SPP1|VEGFA	-7.402	0	45	0	0	-13.7627	44.9883
GO Biological Processes	GO:0045055	regulated exocytosis	19	-8.9986	M1	1	0	19_GO:0051179 localization	-8.9986	5.35576	8.55971	27994	798	131	20	15.2672	3.14246	240|847|1129|1509|1812|1950|2932|2950|3162|3481|4048|4318|4353|5054|5328|5579|5594|6590|6647|7422	ALOX5|CAT|CHRM2|CTSD|DRD1|EGF|GSK3B|GSTP1|HMOX1|IGF2|LTA4H|MMP9|MPO|SERPINE1|PLAU|PRKCB|MAPK1|SLPI|SOD1|VEGFA	-7.402	0	80	1	1	-8.9986	5.35576
GO Biological Processes	GO:0072511	divalent inorganic cation transport	19	-8.99146	M1	1	0	19_GO:0051179 localization	-8.99146	7.10835	9.2656	27994	481	131	16	12.2137	2.8609	581|596|857|1244|1812|1950|2697|2946|3383|3458|3627|5530|5579|5743|6347|6373	BAX|BCL2|CAV1|ABCC2|DRD1|EGF|GJA1|GSTM2|ICAM1|IFNG|CXCL10|PPP3CA|PRKCB|PTGS2|CCL2|CXCL11	-7.39595	0	59	0	0	-11.5248	26.7118
GO Biological Processes	GO:0043542	endothelial cell migration	19	-8.98261	M1	1	0	19_GO:0040011 locomotion	-8.98261	9.67955	10.1342	27994	287	131	13	9.92366	2.6122	207|1545|1803|3091|3162|3315|4780|5468|5578|5743|6772|7124|7422	AKT1|CYP1B1|DPP4|HIF1A|HMOX1|HSPB1|NFE2L2|PPARG|PRKCA|PTGS2|STAT1|TNF|VEGFA	-7.38818	0	13	0	0	-25.4494	21.3695
GO Biological Processes	GO:0045428	regulation of nitric oxide biosynthetic process	19	-8.96575	M1	1	0	19_GO:0050789 regulation of biological process	-8.96575	25.1405	13.6661	27994	68	131	8	6.10687	2.09214	207|857|2475|3383|3458|3553|5743|7124	AKT1|CAV1|MTOR|ICAM1|IFNG|IL1B|PTGS2|TNF	-7.3724	0	11	0	0	-26.7386	213.695
GO Biological Processes	GO:0051403	stress-activated MAPK cascade	19	-8.96426	M1	1	0	19_GO:0023052 signaling	-8.96426	9.64594	10.1127	27994	288	131	13	9.92366	2.6122	207|959|1147|1956|2950|3551|3553|4609|5594|5599|7124|7422|653361	AKT1|CD40LG|CHUK|EGFR|GSTP1|IKBKB|IL1B|MYC|MAPK1|MAPK8|TNF|VEGFA|NCF1	-7.37198	0	35	0	0	-16.3031	20.6801
GO Biological Processes	GO:0030595	leukocyte chemotaxis	19	-8.95704	M1	1	0	19_GO:0040011 locomotion	-8.95704	11.0057	10.5161	27994	233	131	12	9.16031	2.52033	240|1800|1803|2155|3553|3576|3627|5054|5594|6347|6373|7422	ALOX5|DPEP1|DPP4|F7|IL1B|CXCL8|CXCL10|SERPINE1|MAPK1|CCL2|CXCL11|VEGFA	-7.36584	0	42	0	0	-14.4051	14.5229
GO Biological Processes	GO:0042326	negative regulation of phosphorylation	19	-8.95267	M1	1	0	19_GO:0048519 negative regulation of biological process	-8.95267	7.06429	9.22791	27994	484	131	16	12.2137	2.8609	207|581|836|857|891|1026|2475|2950|3315|3458|3486|3553|3725|4609|5465|5925	AKT1|BAX|CASP3|CAV1|CCNB1|CDKN1A|MTOR|GSTP1|HSPB1|IFNG|IGFBP3|IL1B|JUN|MYC|PPARA|RB1	-7.36254	0	56	0	0	-12.0768	11.5511
GO Biological Processes	GO:0009743	response to carbohydrate	19	-8.93589	M1	1	0	19_GO:0050896 response to stimulus	-8.93589	10.9587	10.4893	27994	234	131	12	9.16031	2.52033	836|847|2697|2950|3091|3383|3553|5467|5530|5579|5743|5894	CASP3|CAT|GJA1|GSTP1|HIF1A|ICAM1|IL1B|PPARD|PPP3CA|PRKCB|PTGS2|RAF1	-7.34683	0	81	1	1	-8.93589	10.9587
GO Biological Processes	GO:0046688	response to copper ion	19	-8.93155	M1	1	0	19_GO:0050896 response to stimulus	-8.93155	34.7875	15.2033	27994	43	131	7	5.34351	1.96496	983|1543|1544|3383|3552|4780|6647	CDK1|CYP1A1|CYP1A2|ICAM1|IL1A|NFE2L2|SOD1	-7.34355	0	43	0	0	-14.0637	50.2811
GO Biological Processes	GO:0019748	secondary metabolic process	19	-8.91393	M1	1	0	19_GO:0008152 metabolic process	-8.91393	24.7762	13.5587	27994	69	131	8	6.10687	2.09214	231|596|1244|1543|1544|1545|4780|7157	AKR1B1|BCL2|ABCC2|CYP1A1|CYP1A2|CYP1B1|NFE2L2|TP53	-7.32699	0	39	0	0	-14.9141	64.1084
GO Biological Processes	GO:0031334	positive regulation of protein complex assembly	19	-8.90963	M1	1	0	19_GO:0048518 positive regulation of biological process	-8.90963	9.5465	10.0489	27994	291	131	13	9.92366	2.6122	142|581|2099|2475|2932|3383|3458|3725|4312|4314|7124|7157|7422	PARP1|BAX|ESR1|MTOR|GSK3B|ICAM1|IFNG|JUN|MMP1|MMP3|TNF|TP53|VEGFA	-7.32376	0	15	0	0	-24.5132	30.8425
GO Biological Processes	GO:0007268	chemical synaptic transmission	19	-8.88909	M1	1	0	19_GO:0023052 signaling	-8.88909	5.60801	8.61363	27994	724	131	19	14.5038	3.07666	154|207|760|1129|1728|1812|1956|2475|2932|3553|5327|5530|5579|5594|5743|6347|6530|6532|7124	ADRB2|AKT1|CA2|CHRM2|NQO1|DRD1|EGFR|MTOR|GSK3B|IL1B|PLAT|PPP3CA|PRKCB|MAPK1|PTGS2|CCL2|SLC6A2|SLC6A4|TNF	-7.3057	0	74	0	0	-9.55493	26.7118
GO Biological Processes	GO:0098916	anterograde trans-synaptic signaling	19	-8.88909	M1	1	0	19_GO:0023052 signaling	-8.88909	5.60801	8.61363	27994	724	131	19	14.5038	3.07666	154|207|760|1129|1728|1812|1956|2475|2932|3553|5327|5530|5579|5594|5743|6347|6530|6532|7124	ADRB2|AKT1|CA2|CHRM2|NQO1|DRD1|EGFR|MTOR|GSK3B|IL1B|PLAT|PPP3CA|PRKCB|MAPK1|PTGS2|CCL2|SLC6A2|SLC6A4|TNF	-7.3057	0	74	0	0	-9.55493	26.7118
GO Biological Processes	GO:1902882	regulation of response to oxidative stress	19	-8.88841	M1	1	0	19_GO:0050896 response to stimulus	-8.88841	18.8554	12.3873	27994	102	131	9	6.87023	2.21001	142|207|240|3091|3315|4314|4780|6647|7124	PARP1|AKT1|ALOX5|HIF1A|HSPB1|MMP3|NFE2L2|SOD1|TNF	-7.3057	0	33	0	0	-17.1314	47.4877
GO Biological Processes	GO:0010876	lipid localization	19	-8.87197	M1	1	0	19_GO:0051179 localization	-8.87197	7.63195	9.38993	27994	420	131	15	11.4504	2.78207	207|857|1244|1950|3553|4792|5321|5444|5465|5467|5468|6696|7124|8648|10499	AKT1|CAV1|ABCC2|EGF|IL1B|NFKBIA|PLA2G4A|PON1|PPARA|PPARD|PPARG|SPP1|TNF|NCOA1|NCOA2	-7.29032	0	75	0	0	-9.34547	32.0542
GO Biological Processes	GO:0050867	positive regulation of cell activation	19	-8.85792	M1	1	0	19_GO:0048518 positive regulation of biological process	-8.85792	7.61382	9.37558	27994	421	131	15	11.4504	2.78207	207|596|857|959|1026|1803|3458|3481|3552|3553|3559|3572|5321|6347|7412	AKT1|BCL2|CAV1|CD40LG|CDKN1A|DPP4|IFNG|IGF2|IL1A|IL1B|IL2RA|IL6ST|PLA2G4A|CCL2|VCAM1	-7.27731	0	20	0	0	-20.2541	16.3681
GO Biological Processes	GO:0034976	response to endoplasmic reticulum stress	19	-8.85563	M1	1	0	19_GO:0050896 response to stimulus	-8.85563	9.44908	9.98596	27994	294	131	13	9.92366	2.6122	240|581|595|596|598|857|2932|3309|3576|3725|4780|6347|7157	ALOX5|BAX|CCND1|BCL2|BCL2L1|CAV1|GSK3B|HSPA5|CXCL8|JUN|NFE2L2|CCL2|TP53	-7.27607	0	82	1	1	-8.85563	40.7037
GO Biological Processes	GO:0008630	intrinsic apoptotic signaling pathway in response to DNA damage	19	-8.8504	M1	1	0	19_GO:0023052 signaling	-8.8504	18.6723	12.3205	27994	103	131	9	6.87023	2.21001	581|596|598|842|1026|1869|3162|7124|7157	BAX|BCL2|BCL2L1|CASP9|CDKN1A|E2F1|HMOX1|TNF|TP53	-7.27188	0	83	1	1	-8.8504	45.7917
GO Biological Processes	GO:0044262	cellular carbohydrate metabolic process	19	-8.83777	M1	1	0	19_GO:0008152 metabolic process	-8.83777	9.41705	9.96519	27994	295	131	13	9.92366	2.6122	207|231|2475|2932|3037|3099|3481|3486|3572|5321|5465|7157|10499	AKT1|AKR1B1|MTOR|GSK3B|HAS2|HK2|IGF2|IGFBP3|IL6ST|PLA2G4A|PPARA|TP53|NCOA2	-7.26029	0	29	0	0	-18.4437	33.7413
GO Biological Processes	GO:0051251	positive regulation of lymphocyte activation	19	-8.8275	M1	1	0	19_GO:0002376 immune system process	-8.8275	8.38018	9.62282	27994	357	131	14	10.687	2.69929	207|596|857|959|1026|1803|3458|3481|3552|3553|3559|3572|6347|7412	AKT1|BCL2|CAV1|CD40LG|CDKN1A|DPP4|IFNG|IGF2|IL1A|IL1B|IL2RA|IL6ST|CCL2|VCAM1	-7.25105	0	20	0	0	-20.2541	16.3681
GO Biological Processes	GO:0043279	response to alkaloid	19	-8.8128	M1	1	0	19_GO:0050896 response to stimulus	-8.8128	18.4928	12.2546	27994	104	131	9	6.87023	2.21001	598|836|1812|2475|2946|3309|3383|5468|5970	BCL2L1|CASP3|DRD1|MTOR|GSTM2|HSPA5|ICAM1|PPARG|RELA	-7.23832	0	84	1	1	-8.8128	24.4222
GO Biological Processes	GO:0061180	mammary gland epithelium development	19	-8.8127	M1	1	0	19_GO:0032502 developmental process	-8.8127	24.0783	13.3505	27994	71	131	8	6.10687	2.09214	207|367|581|595|2099|3091|5241|5594	AKT1|AR|BAX|CCND1|ESR1|HIF1A|PGR|MAPK1	-7.23832	0	31	0	0	-18.0915	106.847
GO Biological Processes	GO:0099537	trans-synaptic signaling	19	-8.81073	M1	1	0	19_GO:0023052 signaling	-8.81073	5.54672	8.54715	27994	732	131	19	14.5038	3.07666	154|207|760|1129|1728|1812|1956|2475|2932|3553|5327|5530|5579|5594|5743|6347|6530|6532|7124	ADRB2|AKT1|CA2|CHRM2|NQO1|DRD1|EGFR|MTOR|GSK3B|IL1B|PLAT|PPP3CA|PRKCB|MAPK1|PTGS2|CCL2|SLC6A2|SLC6A4|TNF	-7.23739	0	74	0	0	-9.55493	26.7118
GO Biological Processes	GO:0051146	striated muscle cell differentiation	19	-8.80224	M1	1	0	19_GO:0032502 developmental process	-8.80224	9.35364	9.92394	27994	297	131	13	9.92366	2.6122	207|596|836|891|983|1147|2475|3481|3627|5465|5530|5925|7422	AKT1|BCL2|CASP3|CCNB1|CDK1|CHUK|MTOR|IGF2|CXCL10|PPARA|PPP3CA|RB1|VEGFA	-7.22992	0	63	0	0	-11.069	71.2316
GO Biological Processes	GO:0043254	regulation of protein complex assembly	19	-8.78769	M1	1	0	19_GO:0071840 cellular component organization or biogenesis	-8.78769	6.87951	9.06824	27994	497	131	16	12.2137	2.8609	142|581|2099|2475|2932|3309|3383|3458|3725|4312|4314|5894|5925|7124|7157|7422	PARP1|BAX|ESR1|MTOR|GSK3B|HSPA5|ICAM1|IFNG|JUN|MMP1|MMP3|RAF1|RB1|TNF|TP53|VEGFA	-7.21801	0	15	0	0	-24.5132	30.8425
GO Biological Processes	GO:0035094	response to nicotine	19	-8.78624	M1	1	0	19_GO:0050896 response to stimulus	-8.78624	33.2414	14.8417	27994	45	131	7	5.34351	1.96496	596|836|3162|5465|5594|5970|7124	BCL2|CASP3|HMOX1|PPARA|MAPK1|RELA|TNF	-7.21801	0	85	1	1	-8.78624	33.2414
GO Biological Processes	GO:0045429	positive regulation of nitric oxide biosynthetic process	19	-8.78624	M1	1	0	19_GO:0048518 positive regulation of biological process	-8.78624	33.2414	14.8417	27994	45	131	7	5.34351	1.96496	207|2475|3383|3458|3553|5743|7124	AKT1|MTOR|ICAM1|IFNG|IL1B|PTGS2|TNF	-7.21801	0	11	0	0	-26.7386	213.695
GO Biological Processes	GO:1901028	regulation of mitochondrial outer membrane permeabilization involved in apoptotic signaling pathway	19	-8.78624	M1	1	0	19_GO:0023052 signaling	-8.78624	33.2414	14.8417	27994	45	131	7	5.34351	1.96496	581|596|841|1869|2932|5599|7157	BAX|BCL2|CASP8|E2F1|GSK3B|MAPK8|TP53	-7.21801	0	53	0	0	-12.5473	42.7389
GO Biological Processes	GO:0033135	regulation of peptidyl-serine phosphorylation	19	-8.76497	M1	1	0	19_GO:0050789 regulation of biological process	-8.76497	14.7376	11.372	27994	145	131	10	7.63359	2.31999	207|581|596|857|1956|3458|5743|5894|7124|7422	AKT1|BAX|BCL2|CAV1|EGFR|IFNG|PTGS2|RAF1|TNF|VEGFA	-7.19776	0	18	0	0	-21.0047	17.6445
GO Biological Processes	GO:0006935	chemotaxis	19	-8.73955	M1	1	0	19_GO:0040011 locomotion	-8.73955	5.86357	8.64312	27994	656	131	18	13.7405	3.00794	240|1800|1803|2064|2152|2155|2950|3315|3553|3576|3627|5054|5328|5578|5594|6347|6373|7422	ALOX5|DPEP1|DPP4|ERBB2|F3|F7|GSTP1|HSPB1|IL1B|CXCL8|CXCL10|SERPINE1|PLAU|PRKCA|MAPK1|CCL2|CXCL11|VEGFA	-7.17357	0	42	0	0	-14.4051	14.5229
GO Biological Processes	GO:0014812	muscle cell migration	19	-8.73876	M1	1	0	19_GO:0040011 locomotion	-8.73876	18.1439	12.1255	27994	106	131	9	6.87023	2.21001	596|2950|3037|3486|4780|5054|5327|5328|5467	BCL2|GSTP1|HAS2|IGFBP3|NFE2L2|SERPINE1|PLAT|PLAU|PPARD	-7.17357	0	64	0	0	-11.0201	28.1177
GO Biological Processes	GO:0042330	taxis	19	-8.71882	M1	1	0	19_GO:0040011 locomotion	-8.71882	5.84575	8.62488	27994	658	131	18	13.7405	3.00794	240|1800|1803|2064|2152|2155|2950|3315|3553|3576|3627|5054|5328|5578|5594|6347|6373|7422	ALOX5|DPEP1|DPP4|ERBB2|F3|F7|GSTP1|HSPB1|IL1B|CXCL8|CXCL10|SERPINE1|PLAU|PRKCA|MAPK1|CCL2|CXCL11|VEGFA	-7.15464	0	42	0	0	-14.4051	14.5229
GO Biological Processes	GO:1904407	positive regulation of nitric oxide metabolic process	19	-8.71623	M1	1	0	19_GO:0048518 positive regulation of biological process	-8.71623	32.5188	14.6696	27994	46	131	7	5.34351	1.96496	207|2475|3383|3458|3553|5743|7124	AKT1|MTOR|ICAM1|IFNG|IL1B|PTGS2|TNF	-7.15306	0	11	0	0	-26.7386	213.695
GO Biological Processes	GO:0051222	positive regulation of protein transport	19	-8.70392	M1	1	0	19_GO:0048518 positive regulation of biological process	-8.70392	8.19651	9.48925	27994	365	131	14	10.687	2.69929	983|1956|2064|2697|2932|3091|3458|3552|3553|5467|5594|5743|7124|7157	CDK1|EGFR|ERBB2|GJA1|GSK3B|HIF1A|IFNG|IL1A|IL1B|PPARD|MAPK1|PTGS2|TNF|TP53	-7.14214	0	40	0	0	-14.7066	12.987
GO Biological Processes	GO:0032091	negative regulation of protein binding	19	-8.70231	M1	1	0	19_GO:0065007 biological regulation	-8.70231	17.9743	12.0623	27994	107	131	9	6.87023	2.21001	154|207|581|857|1026|2932|5465|5599|6590	ADRB2|AKT1|BAX|CAV1|CDKN1A|GSK3B|PPARA|MAPK8|SLPI	-7.14214	0	34	0	0	-16.3055	17.9743
GO Biological Processes	GO:1903426	regulation of reactive oxygen species biosynthetic process	19	-8.70231	M1	1	0	19_GO:0050789 regulation of biological process	-8.70231	17.9743	12.0623	27994	107	131	9	6.87023	2.21001	207|240|857|2475|3383|3458|3553|5743|7124	AKT1|ALOX5|CAV1|MTOR|ICAM1|IFNG|IL1B|PTGS2|TNF	-7.14214	0	11	0	0	-26.7386	213.695
GO Biological Processes	GO:0051051	negative regulation of transport	19	-8.68862	M1	1	0	19_GO:0048519 negative regulation of biological process	-8.68862	6.77052	8.9728	27994	505	131	16	12.2137	2.8609	152|207|596|857|1950|2475|2697|2946|3162|3383|3553|4318|5530|5579|5743|7124	ADRA2C|AKT1|BCL2|CAV1|EGF|MTOR|GJA1|GSTM2|HMOX1|ICAM1|IL1B|MMP9|PPP3CA|PRKCB|PTGS2|TNF	-7.12945	0	86	1	1	-8.68862	13.2524
GO Biological Processes	GO:0030225	macrophage differentiation	19	-8.64788	M1	1	0	19_GO:0002376 immune system process	-8.64788	31.8269	14.503	27994	47	131	7	5.34351	1.96496	142|841|3458|4318|5578|5925|7422	PARP1|CASP8|IFNG|MMP9|PRKCA|RB1|VEGFA	-7.09037	0	87	1	1	-8.64788	42.7389
GO Biological Processes	GO:0098771	inorganic ion homeostasis	19	-8.64755	M1	1	0	19_GO:0065007 biological regulation	-8.64755	5.42083	8.40906	27994	749	131	19	14.5038	3.07666	581|596|760|857|1244|1812|1956|2099|2697|2946|3091|3162|3627|4609|5579|5594|6373|6647|9429	BAX|BCL2|CA2|CAV1|ABCC2|DRD1|EGFR|ESR1|GJA1|GSTM2|HIF1A|HMOX1|CXCL10|MYC|PRKCB|MAPK1|CXCL11|SOD1|ABCG2	-7.09037	0	59	0	0	-11.5248	26.7118
GO Biological Processes	GO:0042098	T cell proliferation	19	-8.64131	M1	1	0	19_GO:0008283 cell proliferation	-8.64131	11.9931	10.5898	27994	196	131	11	8.39695	2.42315	581|836|959|2064|3481|3552|3553|3559|3572|7157|7412	BAX|CASP3|CD40LG|ERBB2|IGF2|IL1A|IL1B|IL2RA|IL6ST|TP53|VCAM1	-7.08512	0	20	0	0	-20.2541	16.3681
GO Biological Processes	GO:0033138	positive regulation of peptidyl-serine phosphorylation	19	-8.6305	M1	1	0	19_GO:0048518 positive regulation of biological process	-8.6305	17.6445	11.9384	27994	109	131	9	6.87023	2.21001	207|596|857|1956|3458|5743|5894|7124|7422	AKT1|BCL2|CAV1|EGFR|IFNG|PTGS2|RAF1|TNF|VEGFA	-7.0753	0	18	0	0	-21.0047	17.6445
GO Biological Processes	GO:0006606	protein import into nucleus	19	-8.6216	M1	1	0	19_GO:0051179 localization	-8.6216	14.2463	11.1538	27994	150	131	10	7.63359	2.31999	207|983|1026|1812|3458|4792|5530|5594|5743|7157	AKT1|CDK1|CDKN1A|DRD1|IFNG|NFKBIA|PPP3CA|MAPK1|PTGS2|TP53	-7.06836	0	72	0	0	-9.79486	22.6646
GO Biological Processes	GO:0070665	positive regulation of leukocyte proliferation	19	-8.6216	M1	1	0	19_GO:0008283 cell proliferation	-8.6216	14.2463	11.1538	27994	150	131	10	7.63359	2.31999	596|959|1026|3481|3552|3553|3559|3572|5594|7412	BCL2|CD40LG|CDKN1A|IGF2|IL1A|IL1B|IL2RA|IL6ST|MAPK1|VCAM1	-7.06836	0	20	0	0	-20.2541	16.3681
GO Biological Processes	GO:0031100	animal organ regeneration	19	-8.61926	M1	1	0	19_GO:0032502 developmental process	-8.61926	22.7941	12.9588	27994	75	131	8	6.10687	2.09214	595|983|1026|1956|2155|2950|3162|5468	CCND1|CDK1|CDKN1A|EGFR|F7|GSTP1|HMOX1|PPARG	-7.067	0	21	0	0	-19.9812	24.8965
GO Biological Processes	GO:1902175	regulation of oxidative stress-induced intrinsic apoptotic signaling pathway	19	-8.59263	M1	1	0	19_GO:0023052 signaling	-8.59263	47.4877	16.5708	27994	27	131	6	4.58015	1.82652	142|207|3091|3315|4780|6647	PARP1|AKT1|HIF1A|HSPB1|NFE2L2|SOD1	-7.04135	0	33	0	0	-17.1314	47.4877
GO Biological Processes	GO:0006869	lipid transport	19	-8.58337	M1	1	0	19_GO:0051179 localization	-8.58337	8.02071	9.35971	27994	373	131	14	10.687	2.69929	207|857|1244|1950|3553|4792|5321|5444|5465|5467|5468|6696|8648|10499	AKT1|CAV1|ABCC2|EGF|IL1B|NFKBIA|PLA2G4A|PON1|PPARA|PPARD|PPARG|SPP1|NCOA1|NCOA2	-7.03307	0	75	0	0	-9.34547	32.0542
GO Biological Processes	GO:0009409	response to cold	19	-8.5811	M1	1	0	19_GO:0050896 response to stimulus	-8.5811	31.1638	14.3415	27994	48	131	7	5.34351	1.96496	153|154|841|2353|3627|4792|5468	ADRB1|ADRB2|CASP8|FOS|CXCL10|NFKBIA|PPARG	-7.03178	0	88	1	1	-8.5811	59.3596
GO Biological Processes	GO:1903524	positive regulation of blood circulation	19	-8.57265	M1	1	0	19_GO:0048518 positive regulation of biological process	-8.57265	22.4942	12.8657	27994	76	131	8	6.10687	2.09214	152|153|207|857|1956|2697|3383|5743	ADRA2C|ADRB1|AKT1|CAV1|EGFR|GJA1|ICAM1|PTGS2	-7.0243	0	36	0	0	-16.0134	50.2811
GO Biological Processes	GO:0018108	peptidyl-tyrosine phosphorylation	19	-8.55369	M1	1	0	19_GO:0008152 metabolic process	-8.55369	7.97793	9.32792	27994	375	131	14	10.687	2.69929	857|1950|1956|2064|2475|3383|3458|3481|3572|3645|7124|7157|7422|653361	CAV1|EGF|EGFR|ERBB2|MTOR|ICAM1|IFNG|IGF2|IL6ST|INSRR|TNF|TP53|VEGFA|NCF1	-7.00631	0	77	0	0	-9.24192	27.7012
GO Biological Processes	GO:0051924	regulation of calcium ion transport	19	-8.55205	M1	1	0	19_GO:0051179 localization	-8.55205	10.1357	10.0089	27994	253	131	12	9.16031	2.52033	581|596|857|1812|1950|2697|2946|3383|3627|5743|6347|6373	BAX|BCL2|CAV1|DRD1|EGF|GJA1|GSTM2|ICAM1|CXCL10|PTGS2|CCL2|CXCL11	-7.00564	0	59	0	0	-11.5248	26.7118
GO Biological Processes	GO:0001933	negative regulation of protein phosphorylation	19	-8.54484	M1	1	0	19_GO:0048519 negative regulation of biological process	-8.54484	7.21941	9.05788	27994	444	131	15	11.4504	2.78207	207|581|836|857|891|1026|2475|2950|3315|3458|3486|3553|3725|4609|5925	AKT1|BAX|CASP3|CAV1|CCNB1|CDKN1A|MTOR|GSTP1|HSPB1|IFNG|IGFBP3|IL1B|JUN|MYC|RB1	-6.99939	0	56	0	0	-12.0768	11.5511
GO Biological Processes	GO:0019318	hexose metabolic process	19	-8.53274	M1	1	0	19_GO:0008152 metabolic process	-8.53274	10.0958	9.98508	27994	254	131	12	9.16031	2.52033	207|231|2475|2932|3099|3481|3486|5465|5467|7124|7157|10499	AKT1|AKR1B1|MTOR|GSK3B|HK2|IGF2|IGFBP3|PPARA|PPARD|TNF|TP53|NCOA2	-6.98826	0	29	0	0	-18.4437	33.7413
GO Biological Processes	GO:0150076	neuroinflammatory response	19	-8.5267	M1	1	0	19_GO:0050896 response to stimulus	-8.5267	22.202	12.7742	27994	77	131	8	6.10687	2.09214	1956|3458|3553|3725|4314|4318|5743|7124	EGFR|IFNG|IL1B|JUN|MMP3|MMP9|PTGS2|TNF	-6.98319	0	11	0	0	-26.7386	213.695
GO Biological Processes	GO:0006873	cellular ion homeostasis	19	-8.52549	M1	1	0	19_GO:0065007 biological regulation	-8.52549	5.68169	8.45526	27994	677	131	18	13.7405	3.00794	581|596|760|857|1244|1812|2099|2697|2946|3091|3162|3627|4609|5579|5594|6373|6647|9429	BAX|BCL2|CA2|CAV1|ABCC2|DRD1|ESR1|GJA1|GSTM2|HIF1A|HMOX1|CXCL10|MYC|PRKCB|MAPK1|CXCL11|SOD1|ABCG2	-6.98293	0	59	0	0	-11.5248	26.7118
GO Biological Processes	GO:0018212	peptidyl-tyrosine modification	19	-8.50951	M1	1	0	19_GO:0008152 metabolic process	-8.50951	7.91462	9.28069	27994	378	131	14	10.687	2.69929	857|1950|1956|2064|2475|3383|3458|3481|3572|3645|7124|7157|7422|653361	CAV1|EGF|EGFR|ERBB2|MTOR|ICAM1|IFNG|IGF2|IL6ST|INSRR|TNF|TP53|VEGFA|NCF1	-6.9679	0	77	0	0	-9.24192	27.7012
GO Biological Processes	GO:0009755	hormone-mediated signaling pathway	19	-8.50378	M1	1	0	19_GO:0023052 signaling	-8.50378	11.6368	10.4034	27994	202	131	11	8.39695	2.42315	142|367|2099|2100|2908|4306|5241|5465|5467|5468|8648	PARP1|AR|ESR1|ESR2|NR3C1|NR3C2|PGR|PPARA|PPARD|PPARG|NCOA1	-6.96314	0	5	0	0	-32.7337	19.2212
GO Biological Processes	GO:0001938	positive regulation of endothelial cell proliferation	19	-8.49111	M1	1	0	19_GO:0008283 cell proliferation	-8.49111	17.0199	11.7002	27994	113	131	9	6.87023	2.21001	207|2152|2475|3091|3162|3481|3725|5578|7422	AKT1|F3|MTOR|HIF1A|HMOX1|IGF2|JUN|PRKCA|VEGFA	-6.95365	0	13	0	0	-25.4494	21.3695
GO Biological Processes	GO:0032963	collagen metabolic process	19	-8.49111	M1	1	0	19_GO:0008152 metabolic process	-8.49111	17.0199	11.7002	27994	113	131	9	6.87023	2.21001	1277|1509|3091|4312|4313|4314|4318|5467|5468	COL1A1|CTSD|HIF1A|MMP1|MMP2|MMP3|MMP9|PPARD|PPARG	-6.95365	0	55	0	0	-12.2825	22.7335
GO Biological Processes	GO:0010575	positive regulation of vascular endothelial growth factor production	19	-8.48955	M1	1	0	19_GO:0048518 positive regulation of biological process	-8.48955	45.7917	16.2595	27994	28	131	6	4.58015	1.82652	1545|3091|3552|3553|3572|5743	CYP1B1|HIF1A|IL1A|IL1B|IL6ST|PTGS2	-6.95365	0	11	0	0	-26.7386	213.695
GO Biological Processes	GO:0030194	positive regulation of blood coagulation	19	-8.48955	M1	1	0	19_GO:0048518 positive regulation of biological process	-8.48955	45.7917	16.2595	27994	28	131	6	4.58015	1.82652	2152|2155|4780|5054|5321|7056	F3|F7|NFE2L2|SERPINE1|PLA2G4A|THBD	-6.95365	0	3	0	0	-33.9492	45.7917
GO Biological Processes	GO:1900048	positive regulation of hemostasis	19	-8.48955	M1	1	0	19_GO:0048518 positive regulation of biological process	-8.48955	45.7917	16.2595	27994	28	131	6	4.58015	1.82652	2152|2155|4780|5054|5321|7056	F3|F7|NFE2L2|SERPINE1|PLA2G4A|THBD	-6.95365	0	3	0	0	-33.9492	45.7917
GO Biological Processes	GO:0042310	vasoconstriction	19	-8.48141	M1	1	0	19_GO:0032501 multicellular organismal process	-8.48141	21.9174	12.6845	27994	78	131	8	6.10687	2.09214	152|207|857|1956|2697|3383|5743|6532	ADRA2C|AKT1|CAV1|EGFR|GJA1|ICAM1|PTGS2|SLC6A4	-6.94645	0	36	0	0	-16.0134	50.2811
GO Biological Processes	GO:0071260	cellular response to mechanical stimulus	19	-8.43674	M1	1	0	19_GO:0050896 response to stimulus	-8.43674	21.64	12.5965	27994	79	131	8	6.10687	2.09214	207|841|1277|1956|2697|3553|5599|5743	AKT1|CASP8|COL1A1|EGFR|GJA1|IL1B|MAPK8|PTGS2	-6.90272	0	28	0	0	-18.5429	21.64
GO Biological Processes	GO:0009896	positive regulation of catabolic process	19	-8.42736	M1	1	0	19_GO:0048518 positive regulation of biological process	-8.42736	7.07598	8.93968	27994	453	131	15	11.4504	2.78207	154|207|581|857|1950|2697|2932|3091|3099|3162|3458|3553|4780|5465|7124	ADRB2|AKT1|BAX|CAV1|EGF|GJA1|GSK3B|HIF1A|HK2|HMOX1|IFNG|IL1B|NFE2L2|PPARA|TNF	-6.89428	0	89	1	1	-8.42736	10.2738
GO Biological Processes	GO:0042594	response to starvation	19	-8.41458	M1	1	0	19_GO:0050896 response to stimulus	-8.41458	11.4109	10.2834	27994	206	131	11	8.39695	2.42315	596|1026|2475|3309|3725|4780|5465|5468|5594|5599|7157	BCL2|CDKN1A|MTOR|HSPA5|JUN|NFE2L2|PPARA|PPARG|MAPK1|MAPK8|TP53	-6.88244	0	17	0	0	-21.7	15.1556
GO Biological Processes	GO:0031349	positive regulation of defense response	19	-8.41364	M1	1	0	19_GO:0048518 positive regulation of biological process	-8.41364	6.4756	8.70958	27994	528	131	16	12.2137	2.8609	841|857|1147|1956|2099|2697|3458|3551|3553|3572|4792|5054|5743|5894|5970|7124	CASP8|CAV1|CHUK|EGFR|ESR1|GJA1|IFNG|IKBKB|IL1B|IL6ST|NFKBIA|SERPINE1|PTGS2|RAF1|RELA|TNF	-6.88243	0	54	0	0	-12.3313	10.82
GO Biological Processes	GO:0051129	negative regulation of cellular component organization	19	-8.40636	M1	1	0	19_GO:0048519 negative regulation of biological process	-8.40636	5.23897	8.2058	27994	775	131	19	14.5038	3.07666	142|207|367|598|857|891|1803|2932|3309|3551|3553|3627|5444|5530|5894|6696|7124|7157|7422	PARP1|AKT1|AR|BCL2L1|CAV1|CCNB1|DPP4|GSK3B|HSPA5|IKBKB|IL1B|CXCL10|PON1|PPP3CA|RAF1|SPP1|TNF|TP53|VEGFA	-6.87609	0	37	0	0	-15.5965	53.4237
GO Biological Processes	GO:0043536	positive regulation of blood vessel endothelial cell migration	19	-8.39268	M1	1	0	19_GO:0040011 locomotion	-8.39268	21.3695	12.5101	27994	80	131	8	6.10687	2.09214	207|3091|3162|3315|4780|5578|5743|7422	AKT1|HIF1A|HMOX1|HSPB1|NFE2L2|PRKCA|PTGS2|VEGFA	-6.86396	0	13	0	0	-25.4494	21.3695
GO Biological Processes	GO:0036296	response to increased oxygen levels	19	-8.39055	M1	1	0	19_GO:0050896 response to stimulus	-8.39055	44.2127	15.9643	27994	29	131	6	4.58015	1.82652	847|857|1026|1277|1543|5468	CAT|CAV1|CDKN1A|COL1A1|CYP1A1|PPARG	-6.86396	0	78	0	0	-9.1828	77.7071
GO Biological Processes	GO:0050820	positive regulation of coagulation	19	-8.39055	M1	1	0	19_GO:0048518 positive regulation of biological process	-8.39055	44.2127	15.9643	27994	29	131	6	4.58015	1.82652	2152|2155|4780|5054|5321|7056	F3|F7|NFE2L2|SERPINE1|PLA2G4A|THBD	-6.86396	0	3	0	0	-33.9492	45.7917
GO Biological Processes	GO:0046620	regulation of organ growth	19	-8.39004	M1	1	0	19_GO:0040007 growth	-8.39004	16.5798	11.5294	27994	116	131	9	6.87023	2.21001	207|891|983|2475|2697|5465|5594|6532|6647	AKT1|CCNB1|CDK1|MTOR|GJA1|PPARA|MAPK1|SLC6A4|SOD1	-6.86396	0	63	0	0	-11.069	71.2316
GO Biological Processes	GO:0048146	positive regulation of fibroblast proliferation	19	-8.38959	M1	1	0	19_GO:0008283 cell proliferation	-8.38959	29.3306	13.8852	27994	51	131	7	5.34351	1.96496	891|1026|1869|1956|2099|3725|4609	CCNB1|CDKN1A|E2F1|EGFR|ESR1|JUN|MYC	-6.86396	0	50	0	0	-12.7295	29.3306
GO Biological Processes	GO:0050730	regulation of peptidyl-tyrosine phosphorylation	19	-8.3627	M1	1	0	19_GO:0050789 regulation of biological process	-8.3627	9.75033	9.7761	27994	263	131	12	9.16031	2.52033	857|1950|1956|2475|3383|3458|3481|3572|7124|7157|7422|653361	CAV1|EGF|EGFR|MTOR|ICAM1|IFNG|IGF2|IL6ST|TNF|TP53|VEGFA|NCF1	-6.83799	0	77	0	0	-9.24192	27.7012
GO Biological Processes	GO:0061045	negative regulation of wound healing	19	-8.34921	M1	1	0	19_GO:0048519 negative regulation of biological process	-8.34921	21.1056	12.4252	27994	81	131	8	6.10687	2.09214	240|1026|2697|5054|5327|5328|7056|7124	ALOX5|CDKN1A|GJA1|SERPINE1|PLAT|PLAU|THBD|TNF	-6.82542	0	46	0	0	-13.366	32.8761
GO Biological Processes	GO:0031331	positive regulation of cellular catabolic process	19	-8.33668	M1	1	0	19_GO:0048518 positive regulation of biological process	-8.33668	7.67109	9.09682	27994	390	131	14	10.687	2.69929	154|207|581|857|1950|2932|3091|3099|3162|3458|3553|4780|5465|7124	ADRB2|AKT1|BAX|CAV1|EGF|GSK3B|HIF1A|HK2|HMOX1|IFNG|IL1B|NFE2L2|PPARA|TNF	-6.8138	0	89	0	0	-8.42736	10.2738
GO Biological Processes	GO:0050999	regulation of nitric-oxide synthase activity	19	-8.32849	M1	1	0	19_GO:0050789 regulation of biological process	-8.32849	28.7666	13.7417	27994	52	131	7	5.34351	1.96496	207|857|1956|3091|3552|3553|7124	AKT1|CAV1|EGFR|HIF1A|IL1A|IL1B|TNF	-6.80744	0	11	0	0	-26.7386	213.695
GO Biological Processes	GO:0051205	protein insertion into membrane	19	-8.32849	M1	1	0	19_GO:0071840 cellular component organization or biogenesis	-8.32849	28.7666	13.7417	27994	52	131	7	5.34351	1.96496	581|596|841|1869|1956|5599|7157	BAX|BCL2|CASP8|E2F1|EGFR|MAPK8|TP53	-6.80744	0	53	0	0	-12.5473	42.7389
GO Biological Processes	GO:0034764	positive regulation of transmembrane transport	19	-8.32727	M1	1	0	19_GO:0048518 positive regulation of biological process	-8.32727	11.1935	10.1668	27994	210	131	11	8.39695	2.42315	154|207|581|760|1812|2946|3458|3627|4780|6347|6373	ADRB2|AKT1|BAX|CA2|DRD1|GSTM2|IFNG|CXCL10|NFE2L2|CCL2|CXCL11	-6.80713	0	59	0	0	-11.5248	26.7118
GO Biological Processes	GO:0007259	JAK-STAT cascade	19	-8.29782	M1	1	0	19_GO:0023052 signaling	-8.29782	13.191	10.6702	27994	162	131	10	7.63359	2.31999	231|857|1545|1950|3458|3572|6347|6772|7124|7422	AKR1B1|CAV1|CYP1B1|EGF|IFNG|IL6ST|CCL2|STAT1|TNF|VEGFA	-6.77949	0	77	0	0	-9.24192	27.7012
GO Biological Processes	GO:0043467	regulation of generation of precursor metabolites and energy	19	-8.29782	M1	1	0	19_GO:0050789 regulation of biological process	-8.29782	13.191	10.6702	27994	162	131	10	7.63359	2.31999	207|891|983|2475|2932|3091|3458|3481|5465|7157	AKT1|CCNB1|CDK1|MTOR|GSK3B|HIF1A|IFNG|IGF2|PPARA|TP53	-6.77949	0	29	0	0	-18.4437	33.7413
GO Biological Processes	GO:0001844	protein insertion into mitochondrial membrane involved in apoptotic signaling pathway	19	-8.2953	M1	1	0	19_GO:0023052 signaling	-8.2953	42.7389	15.6837	27994	30	131	6	4.58015	1.82652	581|596|841|1869|5599|7157	BAX|BCL2|CASP8|E2F1|MAPK8|TP53	-6.77789	0	53	0	0	-12.5473	42.7389
GO Biological Processes	GO:1901215	negative regulation of neuron death	19	-8.2843	M1	1	0	19_GO:0048519 negative regulation of biological process	-8.2843	11.0879	10.1096	27994	212	131	11	8.39695	2.42315	207|581|596|598|2932|3091|3162|3725|5465|6347|6647	AKT1|BAX|BCL2|BCL2L1|GSK3B|HIF1A|HMOX1|JUN|PPARA|CCL2|SOD1	-6.76778	0	15	0	0	-24.5132	30.8425
GO Biological Processes	GO:0009267	cellular response to starvation	19	-8.27203	M1	1	0	19_GO:0050896 response to stimulus	-8.27203	13.1101	10.6322	27994	163	131	10	7.63359	2.31999	596|1026|2475|3309|3725|4780|5465|5594|5599|7157	BCL2|CDKN1A|MTOR|HSPA5|JUN|NFE2L2|PPARA|MAPK1|MAPK8|TP53	-6.75642	0	17	0	0	-21.7	15.1556
GO Biological Processes	GO:0097366	response to bronchodilator	19	-8.26865	M1	1	0	19_GO:0050896 response to stimulus	-8.26865	28.2238	13.6023	27994	53	131	7	5.34351	1.96496	1017|1800|1812|3383|4314|5530|6647	CDK2|DPEP1|DRD1|ICAM1|MMP3|PPP3CA|SOD1	-6.75394	0	90	1	1	-8.26865	28.2238
GO Biological Processes	GO:0010564	regulation of cell cycle process	19	-8.26272	M1	1	0	19_GO:0050789 regulation of biological process	-8.26272	5.13299	8.08521	27994	791	131	19	14.5038	3.07666	207|581|595|596|598|891|983|1017|1026|1543|1869|1950|1956|3481|3552|3553|5925|6347|7157	AKT1|BAX|CCND1|BCL2|BCL2L1|CCNB1|CDK1|CDK2|CDKN1A|CYP1A1|E2F1|EGF|EGFR|IGF2|IL1A|IL1B|RB1|CCL2|TP53	-6.74891	0	50	0	0	-12.7295	29.3306
GO Biological Processes	GO:0006006	glucose metabolic process	19	-8.24177	M1	1	0	19_GO:0008152 metabolic process	-8.24177	10.9843	10.0532	27994	214	131	11	8.39695	2.42315	207|2475|2932|3099|3481|3486|5465|5467|7124|7157|10499	AKT1|MTOR|GSK3B|HK2|IGF2|IGFBP3|PPARA|PPARD|TNF|TP53|NCOA2	-6.72886	0	29	0	0	-18.4437	33.7413
GO Biological Processes	GO:0043535	regulation of blood vessel endothelial cell migration	19	-8.22098	M1	1	0	19_GO:0040011 locomotion	-8.22098	12.9512	10.5572	27994	165	131	10	7.63359	2.31999	207|3091|3162|3315|4780|5468|5578|5743|7124|7422	AKT1|HIF1A|HMOX1|HSPB1|NFE2L2|PPARG|PRKCA|PTGS2|TNF|VEGFA	-6.70895	0	13	0	0	-25.4494	21.3695
GO Biological Processes	GO:0030857	negative regulation of epithelial cell differentiation	19	-8.21004	M1	1	0	19_GO:0048519 negative regulation of biological process	-8.21004	27.7012	13.4667	27994	54	131	7	5.34351	1.96496	595|857|2932|3458|4318|6772|7422	CCND1|CAV1|GSK3B|IFNG|MMP9|STAT1|VEGFA	-6.69891	0	77	0	0	-9.24192	27.7012
GO Biological Processes	GO:0007093	mitotic cell cycle checkpoint	19	-8.1957	M1	1	0	19_GO:0048519 negative regulation of biological process	-8.1957	12.8732	10.5203	27994	166	131	10	7.63359	2.31999	581|595|598|891|983|1017|1026|1869|5925|7157	BAX|CCND1|BCL2L1|CCNB1|CDK1|CDK2|CDKN1A|E2F1|RB1|TP53	-6.68546	0	50	0	0	-12.7295	29.3306
GO Biological Processes	GO:0061419	positive regulation of transcription from RNA polymerase II promoter in response to hypoxia	19	-8.16622	M1	1	0	19_GO:0048518 positive regulation of biological process	-8.16622	142.463	23.7618	27994	6	131	4	3.05344	1.50323	3091|4780|7157|7422	HIF1A|NFE2L2|TP53|VEGFA	-6.65687	0	79	0	0	-9.05318	142.463
GO Biological Processes	GO:0097345	mitochondrial outer membrane permeabilization	19	-8.1526	M1	1	0	19_GO:0023052 signaling	-8.1526	27.1975	13.3347	27994	55	131	7	5.34351	1.96496	581|596|841|1869|2932|5599|7157	BAX|BCL2|CASP8|E2F1|GSK3B|MAPK8|TP53	-6.64414	0	53	0	0	-12.5473	42.7389
GO Biological Processes	GO:0070838	divalent metal ion transport	19	-8.15115	M1	1	0	19_GO:0051179 localization	-8.15115	6.74825	8.66389	27994	475	131	15	11.4504	2.78207	581|596|857|1812|1950|2697|2946|3383|3458|3627|5530|5579|5743|6347|6373	BAX|BCL2|CAV1|DRD1|EGF|GJA1|GSTM2|ICAM1|IFNG|CXCL10|PPP3CA|PRKCB|PTGS2|CCL2|CXCL11	-6.64357	0	59	0	0	-11.5248	26.7118
GO Biological Processes	GO:0051962	positive regulation of nervous system development	19	-8.14117	M1	1	0	19_GO:0048518 positive regulation of biological process	-8.14117	6.19405	8.45112	27994	552	131	16	12.2137	2.8609	152|596|1869|1950|2475|3091|3309|3458|3553|3572|4780|5468|5970|7124|7422|8648	ADRA2C|BCL2|E2F1|EGF|MTOR|HIF1A|HSPA5|IFNG|IL1B|IL6ST|NFE2L2|PPARG|RELA|TNF|VEGFA|NCOA1	-6.63537	0	48	0	0	-13.0283	19.4268
GO Biological Processes	GO:0014910	regulation of smooth muscle cell migration	19	-8.1403	M1	1	0	19_GO:0040011 locomotion	-8.1403	19.8786	12.0227	27994	86	131	8	6.10687	2.09214	596|2950|3037|3486|4780|5054|5328|5467	BCL2|GSTP1|HAS2|IGFBP3|NFE2L2|SERPINE1|PLAU|PPARD	-6.63537	0	64	0	0	-11.0201	28.1177
GO Biological Processes	GO:0097756	negative regulation of blood vessel diameter	19	-8.1403	M1	1	0	19_GO:0032501 multicellular organismal process	-8.1403	19.8786	12.0227	27994	86	131	8	6.10687	2.09214	152|207|857|1956|2697|3383|5743|6532	ADRA2C|AKT1|CAV1|EGFR|GJA1|ICAM1|PTGS2|SLC6A4	-6.63537	0	36	0	0	-16.0134	50.2811
GO Biological Processes	GO:0050708	regulation of protein secretion	19	-8.12899	M1	1	0	19_GO:0051179 localization	-8.12899	7.38698	8.87772	27994	405	131	14	10.687	2.69929	152|240|959|1803|1956|2697|3091|3458|3552|3553|5467|5530|5578|7124	ADRA2C|ALOX5|CD40LG|DPP4|EGFR|GJA1|HIF1A|IFNG|IL1A|IL1B|PPARD|PPP3CA|PRKCA|TNF	-6.62493	0	40	0	0	-14.7066	12.987
GO Biological Processes	GO:0006977	DNA damage response, signal transduction by p53 class mediator resulting in cell cycle arrest	19	-8.0963	M1	1	0	19_GO:0048519 negative regulation of biological process	-8.0963	26.7118	13.2061	27994	56	131	7	5.34351	1.96496	581|891|983|1017|1026|1869|7157	BAX|CCNB1|CDK1|CDK2|CDKN1A|E2F1|TP53	-6.59312	0	50	0	0	-12.7295	29.3306
GO Biological Processes	GO:0043491	protein kinase B signaling	19	-8.09326	M1	1	0	19_GO:0023052 signaling	-8.09326	9.22423	9.44928	27994	278	131	12	9.16031	2.52033	207|1950|1956|2064|2099|2152|2155|2475|3481|3553|6347|7124	AKT1|EGF|EGFR|ERBB2|ESR1|F3|F7|MTOR|IGF2|IL1B|CCL2|TNF	-6.59096	0	91	1	1	-8.09326	10.8048
GO Biological Processes	GO:0002009	morphogenesis of an epithelium	19	-8.08615	M1	1	0	19_GO:0032502 developmental process	-8.08615	6.13845	8.39919	27994	557	131	16	12.2137	2.8609	367|596|760|836|1950|1956|2099|2475|2697|3091|3627|4609|5241|6772|7124|7422	AR|BCL2|CA2|CASP3|EGF|EGFR|ESR1|MTOR|GJA1|HIF1A|CXCL10|MYC|PGR|STAT1|TNF|VEGFA	-6.58473	0	31	0	0	-18.0915	106.847
GO Biological Processes	GO:0051170	import into nucleus	19	-8.07179	M1	1	0	19_GO:0051179 localization	-8.07179	12.4968	10.3399	27994	171	131	10	7.63359	2.31999	207|983|1026|1812|3458|4792|5530|5594|5743|7157	AKT1|CDK1|CDKN1A|DRD1|IFNG|NFKBIA|PPP3CA|MAPK1|PTGS2|TP53	-6.57124	0	72	0	0	-9.79486	22.6646
GO Biological Processes	GO:0097696	STAT cascade	19	-8.04749	M1	1	0	19_GO:0023052 signaling	-8.04749	12.4241	10.3048	27994	172	131	10	7.63359	2.31999	231|857|1545|1950|3458|3572|6347|6772|7124|7422	AKR1B1|CAV1|CYP1B1|EGF|IFNG|IL6ST|CCL2|STAT1|TNF|VEGFA	-6.5478	0	77	0	0	-9.24192	27.7012
GO Biological Processes	GO:0001541	ovarian follicle development	19	-8.04108	M1	1	0	19_GO:0022414 reproductive process	-8.04108	26.2432	13.0809	27994	57	131	7	5.34351	1.96496	581|596|598|2099|3383|6647|7422	BAX|BCL2|BCL2L1|ESR1|ICAM1|SOD1|VEGFA	-6.54399	0	68	0	0	-10.3658	26.2432
GO Biological Processes	GO:0072431	signal transduction involved in mitotic G1 DNA damage checkpoint	19	-8.04108	M1	1	0	19_GO:0048519 negative regulation of biological process	-8.04108	26.2432	13.0809	27994	57	131	7	5.34351	1.96496	581|891|983|1017|1026|1869|7157	BAX|CCNB1|CDK1|CDK2|CDKN1A|E2F1|TP53	-6.54399	0	50	0	0	-12.7295	29.3306
GO Biological Processes	GO:1902400	intracellular signal transduction involved in G1 DNA damage checkpoint	19	-8.04108	M1	1	0	19_GO:0048519 negative regulation of biological process	-8.04108	26.2432	13.0809	27994	57	131	7	5.34351	1.96496	581|891|983|1017|1026|1869|7157	BAX|CCNB1|CDK1|CDK2|CDKN1A|E2F1|TP53	-6.54399	0	50	0	0	-12.7295	29.3306
GO Biological Processes	GO:0050769	positive regulation of neurogenesis	19	-8.03045	M1	1	0	19_GO:0048518 positive regulation of biological process	-8.03045	6.60911	8.54425	27994	485	131	15	11.4504	2.78207	152|596|1869|2475|3091|3309|3458|3553|3572|4780|5468|5970|7124|7422|8648	ADRA2C|BCL2|E2F1|MTOR|HIF1A|HSPA5|IFNG|IL1B|IL6ST|NFE2L2|PPARG|RELA|TNF|VEGFA|NCOA1	-6.53422	0	48	0	0	-13.0283	19.4268
GO Biological Processes	GO:0010039	response to iron ion	19	-8.02954	M1	1	0	19_GO:0050896 response to stimulus	-8.02954	38.8536	14.9188	27994	33	131	6	4.58015	1.82652	595|596|891|1543|3091|3162	CCND1|BCL2|CCNB1|CYP1A1|HIF1A|HMOX1	-6.53418	0	92	1	1	-8.02954	106.847
GO Biological Processes	GO:0015718	monocarboxylic acid transport	19	-8.02334	M1	1	0	19_GO:0051179 localization	-8.02334	12.3523	10.2699	27994	173	131	10	7.63359	2.31999	207|1244|3553|5321|5465|5467|5468|8648|9429|10499	AKT1|ABCC2|IL1B|PLA2G4A|PPARA|PPARD|PPARG|NCOA1|ABCG2|NCOA2	-6.52969	0	93	1	1	-8.02334	14.8105
GO Biological Processes	GO:0033209	tumor necrosis factor-mediated signaling pathway	19	-8.02334	M1	1	0	19_GO:0023052 signaling	-8.02334	12.3523	10.2699	27994	173	131	10	7.63359	2.31999	841|959|1147|2950|3551|4792|5970|6772|7124|7157	CASP8|CD40LG|CHUK|GSTP1|IKBKB|NFKBIA|RELA|STAT1|TNF|TP53	-6.52969	0	24	0	0	-19.0213	42.7389
GO Biological Processes	GO:0043405	regulation of MAP kinase activity	19	-7.99242	M1	1	0	19_GO:0023052 signaling	-7.99242	8.00585	9.00426	27994	347	131	13	9.92366	2.6122	857|959|983|1950|1956|2064|2950|3553|5594|5894|6647|7124|7422	CAV1|CD40LG|CDK1|EGF|EGFR|ERBB2|GSTP1|IL1B|MAPK1|RAF1|SOD1|TNF|VEGFA	-6.49962	0	35	0	0	-16.3031	20.6801
GO Biological Processes	GO:0001822	kidney development	19	-7.99001	M1	1	0	19_GO:0032502 developmental process	-7.99001	9.02935	9.32541	27994	284	131	12	9.16031	2.52033	231|581|596|760|842|847|3037|4318|4609|4953|6772|7422	AKR1B1|BAX|BCL2|CA2|CASP9|CAT|HAS2|MMP9|MYC|ODC1|STAT1|VEGFA	-6.49892	0	76	0	0	-9.25182	28.1177
GO Biological Processes	GO:0043270	positive regulation of ion transport	19	-7.99001	M1	1	0	19_GO:0048518 positive regulation of biological process	-7.99001	9.02935	9.32541	27994	284	131	12	9.16031	2.52033	154|207|581|857|1812|2946|3458|3553|3627|6347|6373|6532	ADRB2|AKT1|BAX|CAV1|DRD1|GSTM2|IFNG|IL1B|CXCL10|CCL2|CXCL11|SLC6A4	-6.49892	0	59	0	0	-11.5248	26.7118
GO Biological Processes	GO:0019369	arachidonic acid metabolic process	19	-7.9869	M1	1	0	19_GO:0008152 metabolic process	-7.9869	25.7907	12.9589	27994	58	131	7	5.34351	1.96496	240|1543|1544|1545|5321|5742|5743	ALOX5|CYP1A1|CYP1A2|CYP1B1|PLA2G4A|PTGS1|PTGS2	-6.49667	0	32	0	0	-17.2246	56.5662
GO Biological Processes	GO:0010506	regulation of autophagy	19	-7.97759	M1	1	0	19_GO:0050789 regulation of biological process	-7.97759	7.98285	8.98778	27994	348	131	13	9.92366	2.6122	154|207|596|836|2475|2932|3091|3099|3162|3315|3458|5599|7157	ADRB2|AKT1|BCL2|CASP3|MTOR|GSK3B|HIF1A|HK2|HMOX1|HSPB1|IFNG|MAPK8|TP53	-6.48821	0	9	0	0	-26.9935	25.1405
GO Biological Processes	GO:0032869	cellular response to insulin stimulus	19	-7.95593	M1	1	0	19_GO:0050896 response to stimulus	-7.95593	10.3098	9.6783	27994	228	131	11	8.39695	2.42315	142|207|2932|2950|3481|3553|3645|5468|5579|5970|6772	PARP1|AKT1|GSK3B|GSTP1|IGF2|IL1B|INSRR|PPARG|PRKCB|RELA|STAT1	-6.46739	0	6	0	0	-32.439	12.8345
GO Biological Processes	GO:0051204	protein insertion into mitochondrial membrane	19	-7.94689	M1	1	0	19_GO:0071840 cellular component organization or biogenesis	-7.94689	37.7108	14.6863	27994	34	131	6	4.58015	1.82652	581|596|841|1869|5599|7157	BAX|BCL2|CASP8|E2F1|MAPK8|TP53	-6.45919	0	53	0	0	-12.5473	42.7389
GO Biological Processes	GO:0010720	positive regulation of cell development	19	-7.94577	M1	1	0	19_GO:0048518 positive regulation of biological process	-7.94577	5.99845	8.26711	27994	570	131	16	12.2137	2.8609	152|596|1869|2475|3037|3091|3309|3458|3553|3572|4780|5468|5970|7124|7422|8648	ADRA2C|BCL2|E2F1|MTOR|HAS2|HIF1A|HSPA5|IFNG|IL1B|IL6ST|NFE2L2|PPARG|RELA|TNF|VEGFA|NCOA1	-6.45892	0	48	0	0	-13.0283	19.4268
GO Biological Processes	GO:0021700	developmental maturation	19	-7.9393	M1	1	0	19_GO:0032502 developmental process	-7.9393	8.93497	9.26484	27994	287	131	12	9.16031	2.52033	231|596|860|891|1026|2475|3091|4313|5241|5468|5925|7422	AKR1B1|BCL2|RUNX2|CCNB1|CDKN1A|MTOR|HIF1A|MMP2|PGR|PPARG|RB1|VEGFA	-6.45358	0	51	0	0	-12.6756	53.4237
GO Biological Processes	GO:0055080	cation homeostasis	19	-7.9369	M1	1	0	19_GO:0065007 biological regulation	-7.9369	5.20501	7.94352	27994	739	131	18	13.7405	3.00794	581|596|760|857|1812|1956|2099|2697|2946|3091|3162|3627|4609|5579|5594|6373|6647|9429	BAX|BCL2|CA2|CAV1|DRD1|EGFR|ESR1|GJA1|GSTM2|HIF1A|HMOX1|CXCL10|MYC|PRKCB|MAPK1|CXCL11|SOD1|ABCG2	-6.45358	0	59	0	0	-11.5248	26.7118
GO Biological Processes	GO:0050920	regulation of chemotaxis	19	-7.93626	M1	1	0	19_GO:0040011 locomotion	-7.93626	10.2648	9.65277	27994	229	131	11	8.39695	2.42315	1803|2152|2155|2950|3315|3576|3627|5054|5594|6347|7422	DPP4|F3|F7|GSTP1|HSPB1|CXCL8|CXCL10|SERPINE1|MAPK1|CCL2|VEGFA	-6.45358	0	42	0	0	-14.4051	14.5229
GO Biological Processes	GO:0031663	lipopolysaccharide-mediated signaling pathway	19	-7.93374	M1	1	0	19_GO:0051704 multi-organism process	-7.93374	25.3536	12.8399	27994	59	131	7	5.34351	1.96496	207|3553|4792|5578|5594|6347|7124	AKT1|IL1B|NFKBIA|PRKCA|MAPK1|CCL2|TNF	-6.45358	0	94	1	1	-7.93374	25.3536
GO Biological Processes	GO:0043525	positive regulation of neuron apoptotic process	19	-7.93374	M1	1	0	19_GO:0048518 positive regulation of biological process	-7.93374	25.3536	12.8399	27994	59	131	7	5.34351	1.96496	581|836|842|1728|3725|7124|7157	BAX|CASP3|CASP9|NQO1|JUN|TNF|TP53	-6.45358	0	15	0	0	-24.5132	30.8425
GO Biological Processes	GO:0072413	signal transduction involved in mitotic cell cycle checkpoint	19	-7.93374	M1	1	0	19_GO:0048519 negative regulation of biological process	-7.93374	25.3536	12.8399	27994	59	131	7	5.34351	1.96496	581|891|983|1017|1026|1869|7157	BAX|CCNB1|CDK1|CDK2|CDKN1A|E2F1|TP53	-6.45358	0	50	0	0	-12.7295	29.3306
GO Biological Processes	GO:1902402	signal transduction involved in mitotic DNA damage checkpoint	19	-7.93374	M1	1	0	19_GO:0048519 negative regulation of biological process	-7.93374	25.3536	12.8399	27994	59	131	7	5.34351	1.96496	581|891|983|1017|1026|1869|7157	BAX|CCNB1|CDK1|CDK2|CDKN1A|E2F1|TP53	-6.45358	0	50	0	0	-12.7295	29.3306
GO Biological Processes	GO:1902403	signal transduction involved in mitotic DNA integrity checkpoint	19	-7.93374	M1	1	0	19_GO:0048519 negative regulation of biological process	-7.93374	25.3536	12.8399	27994	59	131	7	5.34351	1.96496	581|891|983|1017|1026|1869|7157	BAX|CCNB1|CDK1|CDK2|CDKN1A|E2F1|TP53	-6.45358	0	50	0	0	-12.7295	29.3306
GO Biological Processes	GO:0050680	negative regulation of epithelial cell proliferation	19	-7.92826	M1	1	0	19_GO:0008283 cell proliferation	-7.92826	12.0731	10.1333	27994	177	131	10	7.63359	2.31999	240|367|857|2697|5467|5468|5925|6347|6772|7124	ALOX5|AR|CAV1|GJA1|PPARD|PPARG|RB1|CCL2|STAT1|TNF	-6.44893	0	22	0	0	-19.4308	18.0224
GO Biological Processes	GO:0072657	protein localization to membrane	19	-7.92657	M1	1	0	19_GO:0051179 localization	-7.92657	5.55475	8.08167	27994	654	131	17	12.9771	2.93609	207|367|581|596|598|841|857|1869|1956|2064|3309|3458|3551|5599|7124|7157|653361	AKT1|AR|BAX|BCL2|BCL2L1|CASP8|CAV1|E2F1|EGFR|ERBB2|HSPA5|IFNG|IKBKB|MAPK8|TNF|TP53|NCF1	-6.44808	0	53	0	0	-12.5473	42.7389
GO Biological Processes	GO:0030100	regulation of endocytosis	19	-7.92252	M1	1	0	19_GO:0071840 cellular component organization or biogenesis	-7.92252	8.90394	9.24484	27994	288	131	12	9.16031	2.52033	857|1950|3458|3553|5054|5468|5530|6347|6401|6647|7124|7422	CAV1|EGF|IFNG|IL1B|SERPINE1|PPARG|PPP3CA|CCL2|SELE|SOD1|TNF|VEGFA	-6.44485	0	71	0	0	-9.95843	24.6571
GO Biological Processes	GO:0001836	release of cytochrome c from mitochondria	19	-7.88155	M1	1	0	19_GO:0023052 signaling	-7.88155	24.931	12.7238	27994	60	131	7	5.34351	1.96496	207|581|596|598|3725|4318|7157	AKT1|BAX|BCL2|BCL2L1|JUN|MMP9|TP53	-6.40634	0	95	1	1	-7.88155	37.7108
GO Biological Processes	GO:0019229	regulation of vasoconstriction	19	-7.88155	M1	1	0	19_GO:0032501 multicellular organismal process	-7.88155	24.931	12.7238	27994	60	131	7	5.34351	1.96496	152|207|857|1956|2697|3383|5743	ADRA2C|AKT1|CAV1|EGFR|GJA1|ICAM1|PTGS2	-6.40634	0	36	0	0	-16.0134	50.2811
GO Biological Processes	GO:1903428	positive regulation of reactive oxygen species biosynthetic process	19	-7.88155	M1	1	0	19_GO:0048518 positive regulation of biological process	-7.88155	24.931	12.7238	27994	60	131	7	5.34351	1.96496	207|2475|3383|3458|3553|5743|7124	AKT1|MTOR|ICAM1|IFNG|IL1B|PTGS2|TNF	-6.40634	0	11	0	0	-26.7386	213.695
GO Biological Processes	GO:0006816	calcium ion transport	19	-7.85257	M1	1	0	19_GO:0051179 localization	-7.85257	7.02283	8.58913	27994	426	131	14	10.687	2.69929	581|596|857|1812|1950|2697|2946|3383|3627|5530|5579|5743|6347|6373	BAX|BCL2|CAV1|DRD1|EGF|GJA1|GSTM2|ICAM1|CXCL10|PPP3CA|PRKCB|PTGS2|CCL2|CXCL11	-6.37819	0	59	0	0	-11.5248	26.7118
GO Biological Processes	GO:0072001	renal system development	19	-7.83964	M1	1	0	19_GO:0032502 developmental process	-7.83964	8.752	9.14632	27994	293	131	12	9.16031	2.52033	231|581|596|760|842|847|3037|4318|4609|4953|6772|7422	AKR1B1|BAX|BCL2|CA2|CASP9|CAT|HAS2|MMP9|MYC|ODC1|STAT1|VEGFA	-6.36607	0	76	0	0	-9.25182	28.1177
GO Biological Processes	GO:1902041	regulation of extrinsic apoptotic signaling pathway via death domain receptors	19	-7.83029	M1	1	0	19_GO:0023052 signaling	-7.83029	24.5223	12.6105	27994	61	131	7	5.34351	1.96496	598|841|2932|3162|3383|5054|5894	BCL2L1|CASP8|GSK3B|HMOX1|ICAM1|SERPINE1|RAF1	-6.359	0	8	0	0	-28.7104	36.4845
GO Biological Processes	GO:1902110	positive regulation of mitochondrial membrane permeability involved in apoptotic process	19	-7.83029	M1	1	0	19_GO:0071840 cellular component organization or biogenesis	-7.83029	24.5223	12.6105	27994	61	131	7	5.34351	1.96496	581|596|841|1869|2932|5599|7157	BAX|BCL2|CASP8|E2F1|GSK3B|MAPK8|TP53	-6.359	0	53	0	0	-12.5473	42.7389
GO Biological Processes	GO:0030003	cellular cation homeostasis	19	-7.83012	M1	1	0	19_GO:0065007 biological regulation	-7.83012	5.4711	7.99512	27994	664	131	17	12.9771	2.93609	581|596|760|857|1812|2099|2697|2946|3091|3162|3627|4609|5579|5594|6373|6647|9429	BAX|BCL2|CA2|CAV1|DRD1|ESR1|GJA1|GSTM2|HIF1A|HMOX1|CXCL10|MYC|PRKCB|MAPK1|CXCL11|SOD1|ABCG2	-6.359	0	59	0	0	-11.5248	26.7118
GO Biological Processes	GO:0045444	fat cell differentiation	19	-7.80121	M1	1	0	19_GO:0032502 developmental process	-7.80121	9.96034	9.47836	27994	236	131	11	8.39695	2.42315	153|154|207|240|595|1869|2475|5467|5468|5743|7124	ADRB1|ADRB2|AKT1|ALOX5|CCND1|E2F1|MTOR|PPARD|PPARG|PTGS2|TNF	-6.33091	0	73	0	0	-9.68214	64.1084
GO Biological Processes	GO:0051591	response to cAMP	19	-7.79559	M1	1	0	19_GO:0050896 response to stimulus	-7.79559	17.9953	11.3774	27994	95	131	8	6.10687	2.09214	196|1277|2353|3309|5970|6772|7056|50506	AHR|COL1A1|FOS|HSPA5|RELA|STAT1|THBD|DUOX2	-6.3261	0	44	0	0	-13.9064	19.9448
GO Biological Processes	GO:0048729	tissue morphogenesis	19	-7.79202	M1	1	0	19_GO:0032502 developmental process	-7.79202	5.43834	7.96099	27994	668	131	17	12.9771	2.93609	367|596|760|836|1281|1950|1956|2099|2475|2697|3091|3627|4609|5241|6772|7124|7422	AR|BCL2|CA2|CASP3|COL3A1|EGF|EGFR|ESR1|MTOR|GJA1|HIF1A|CXCL10|MYC|PGR|STAT1|TNF|VEGFA	-6.32551	0	31	0	0	-18.0915	106.847
GO Biological Processes	GO:0005996	monosaccharide metabolic process	19	-7.79067	M1	1	0	19_GO:0008152 metabolic process	-7.79067	8.6633	9.08832	27994	296	131	12	9.16031	2.52033	207|231|2475|2932|3099|3481|3486|5465|5467|7124|7157|10499	AKT1|AKR1B1|MTOR|GSK3B|HK2|IGF2|IGFBP3|PPARA|PPARD|TNF|TP53|NCOA2	-6.32551	0	29	0	0	-18.4437	33.7413
GO Biological Processes	GO:0001959	regulation of cytokine-mediated signaling pathway	19	-7.78999	M1	1	0	19_GO:0023052 signaling	-7.78999	11.6773	9.93631	27994	183	131	10	7.63359	2.31999	841|857|1147|2950|3091|3458|3551|5468|6772|7124	CASP8|CAV1|CHUK|GSTP1|HIF1A|IFNG|IKBKB|PPARG|STAT1|TNF	-6.32551	0	24	0	0	-19.0213	42.7389
GO Biological Processes	GO:0001893	maternal placenta development	19	-7.78936	M1	1	0	19_GO:0022414 reproductive process	-7.78936	35.6158	14.2501	27994	36	131	6	4.58015	1.82652	207|2697|5467|5594|5743|6696	AKT1|GJA1|PPARD|MAPK1|PTGS2|SPP1	-6.32551	0	16	0	0	-23.5716	42.7389
GO Biological Processes	GO:0034405	response to fluid shear stress	19	-7.78936	M1	1	0	19_GO:0050896 response to stimulus	-7.78936	35.6158	14.2501	27994	36	131	6	4.58015	1.82652	207|760|2697|3037|4780|5743	AKT1|CA2|GJA1|HAS2|NFE2L2|PTGS2	-6.32551	0	96	1	1	-7.78936	40.7037
GO Biological Processes	GO:1901099	negative regulation of signal transduction in absence of ligand	19	-7.78936	M1	1	0	19_GO:0048519 negative regulation of biological process	-7.78936	35.6158	14.2501	27994	36	131	6	4.58015	1.82652	207|596|598|3552|3553|7124	AKT1|BCL2|BCL2L1|IL1A|IL1B|TNF	-6.32551	0	58	0	0	-11.6428	35.6158
GO Biological Processes	GO:2001240	negative regulation of extrinsic apoptotic signaling pathway in absence of ligand	19	-7.78936	M1	1	0	19_GO:0048519 negative regulation of biological process	-7.78936	35.6158	14.2501	27994	36	131	6	4.58015	1.82652	207|596|598|3552|3553|7124	AKT1|BCL2|BCL2L1|IL1A|IL1B|TNF	-6.32551	0	58	0	0	-11.6428	35.6158
GO Biological Processes	GO:0050671	positive regulation of lymphocyte proliferation	19	-7.78166	M1	1	0	19_GO:0008283 cell proliferation	-7.78166	14.1416	10.5339	27994	136	131	9	6.87023	2.21001	596|959|1026|3481|3552|3553|3559|3572|7412	BCL2|CD40LG|CDKN1A|IGF2|IL1A|IL1B|IL2RA|IL6ST|VCAM1	-6.3186	0	20	0	0	-20.2541	16.3681
GO Biological Processes	GO:0051348	negative regulation of transferase activity	19	-7.77447	M1	1	0	19_GO:0065007 biological regulation	-7.77447	8.63413	9.06917	27994	297	131	12	9.16031	2.52033	207|836|857|1026|2932|2950|3315|3458|3553|5468|5925|7157	AKT1|CASP3|CAV1|CDKN1A|GSK3B|GSTP1|HSPB1|IFNG|IL1B|PPARG|RB1|TP53	-6.31221	0	56	0	0	-12.0768	11.5511
GO Biological Processes	GO:0035994	response to muscle stretch	19	-7.77068	M1	1	0	19_GO:0050896 response to stimulus	-7.77068	59.3596	16.9825	27994	18	131	5	3.81679	1.67403	2353|3725|4792|5894|5970	FOS|JUN|NFKBIA|RAF1|RELA	-6.30922	0	88	0	0	-8.5811	59.3596
GO Biological Processes	GO:0032946	positive regulation of mononuclear cell proliferation	19	-7.75385	M1	1	0	19_GO:0008283 cell proliferation	-7.75385	14.0383	10.4897	27994	137	131	9	6.87023	2.21001	596|959|1026|3481|3552|3553|3559|3572|7412	BCL2|CD40LG|CDKN1A|IGF2|IL1A|IL1B|IL2RA|IL6ST|VCAM1	-6.29318	0	20	0	0	-20.2541	16.3681
GO Biological Processes	GO:0002791	regulation of peptide secretion	19	-7.75137	M1	1	0	19_GO:0051179 localization	-7.75137	6.89338	8.4843	27994	434	131	14	10.687	2.69929	152|240|959|1803|1956|2697|3091|3458|3552|3553|5467|5530|5578|7124	ADRA2C|ALOX5|CD40LG|DPP4|EGFR|GJA1|HIF1A|IFNG|IL1A|IL1B|PPARD|PPP3CA|PRKCA|TNF	-6.29149	0	40	0	0	-14.7066	12.987
GO Biological Processes	GO:1902686	mitochondrial outer membrane permeabilization involved in programmed cell death	19	-7.73048	M1	1	0	19_GO:0071840 cellular component organization or biogenesis	-7.73048	23.7439	12.3919	27994	63	131	7	5.34351	1.96496	581|596|841|1869|2932|5599|7157	BAX|BCL2|CASP8|E2F1|GSK3B|MAPK8|TP53	-6.2714	0	53	0	0	-12.5473	42.7389
GO Biological Processes	GO:0008217	regulation of blood pressure	19	-7.70056	M1	1	0	19_GO:0032501 multicellular organismal process	-7.70056	11.4275	9.81005	27994	187	131	10	7.63359	2.31999	153|154|367|2697|3162|5465|5468|5742|5743|6647	ADRB1|ADRB2|AR|GJA1|HMOX1|PPARA|PPARG|PTGS1|PTGS2|SOD1	-6.24226	0	97	1	1	-7.70056	17.3266
GO Biological Processes	GO:0030098	lymphocyte differentiation	19	-7.6909	M1	1	0	19_GO:0002376 immune system process	-7.6909	7.549	8.67134	27994	368	131	13	9.92366	2.6122	581|596|860|959|2064|2475|3458|3552|3553|3559|6647|7157|7412	BAX|BCL2|RUNX2|CD40LG|ERBB2|MTOR|IFNG|IL1A|IL1B|IL2RA|SOD1|TP53|VCAM1	-6.23339	0	98	1	1	-7.6909	91.5834
GO Biological Processes	GO:1904035	regulation of epithelial cell apoptotic process	19	-7.68853	M1	1	0	19_GO:0050789 regulation of biological process	-7.68853	17.4445	11.1817	27994	98	131	8	6.10687	2.09214	959|2475|3162|3383|4780|5054|6347|7124	CD40LG|MTOR|HMOX1|ICAM1|NFE2L2|SERPINE1|CCL2|TNF	-6.2326	0	66	0	0	-10.9361	21.3695
GO Biological Processes	GO:2001243	negative regulation of intrinsic apoptotic signaling pathway	19	-7.68853	M1	1	0	19_GO:0048519 negative regulation of biological process	-7.68853	17.4445	11.1817	27994	98	131	8	6.10687	2.09214	207|596|598|3091|3315|4318|4780|5743	AKT1|BCL2|BCL2L1|HIF1A|HSPB1|MMP9|NFE2L2|PTGS2	-6.2326	0	33	0	0	-17.1314	47.4877
GO Biological Processes	GO:0043123	positive regulation of I-kappaB kinase/NF-kappaB signaling	19	-7.67853	M1	1	0	19_GO:0048518 positive regulation of biological process	-7.67853	11.3667	9.77908	27994	188	131	10	7.63359	2.31999	207|841|1147|2697|3162|3551|3553|5579|5970|7124	AKT1|CASP8|CHUK|GJA1|HMOX1|IKBKB|IL1B|PRKCB|RELA|TNF	-6.22338	0	24	0	0	-19.0213	42.7389
GO Biological Processes	GO:0009306	protein secretion	19	-7.66284	M1	1	0	19_GO:0051179 localization	-7.66284	6.20004	8.18302	27994	517	131	15	11.4504	2.78207	152|240|959|1803|1956|2697|3091|3458|3552|3553|5467|5530|5578|5894|7124	ADRA2C|ALOX5|CD40LG|DPP4|EGFR|GJA1|HIF1A|IFNG|IL1A|IL1B|PPARD|PPP3CA|PRKCA|RAF1|TNF	-6.20847	0	40	0	0	-14.7066	12.987
GO Biological Processes	GO:0010565	regulation of cellular ketone metabolic process	19	-7.65663	M1	1	0	19_GO:0050789 regulation of biological process	-7.65663	11.3066	9.74835	27994	189	131	10	7.63359	2.31999	207|857|1728|2475|3553|4953|5465|5467|5468|5743	AKT1|CAV1|NQO1|MTOR|IL1B|ODC1|PPARA|PPARD|PPARG|PTGS2	-6.20383	0	73	0	0	-9.68214	64.1084
GO Biological Processes	GO:0071478	cellular response to radiation	19	-7.65663	M1	1	0	19_GO:0050896 response to stimulus	-7.65663	11.3066	9.74835	27994	189	131	10	7.63359	2.31999	142|581|598|842|1026|2002|3309|4609|5743|7157	PARP1|BAX|BCL2L1|CASP9|CDKN1A|ELK1|HSPA5|MYC|PTGS2|TP53	-6.20383	0	19	0	0	-20.3862	38.1598
GO Biological Processes	GO:0043401	steroid hormone mediated signaling pathway	19	-7.64481	M1	1	0	19_GO:0023052 signaling	-7.64481	13.6401	10.3174	27994	141	131	9	6.87023	2.21001	142|367|2099|2100|2908|4306|5241|5465|5467	PARP1|AR|ESR1|ESR2|NR3C1|NR3C2|PGR|PPARA|PPARD	-6.19279	0	5	0	0	-32.7337	19.2212
GO Biological Processes	GO:0032885	regulation of polysaccharide biosynthetic process	19	-7.64122	M1	1	0	19_GO:0050789 regulation of biological process	-7.64122	33.7413	13.8483	27994	38	131	6	4.58015	1.82652	207|1950|2475|2932|3037|3481	AKT1|EGF|MTOR|GSK3B|HAS2|IGF2	-6.18997	0	29	0	0	-18.4437	33.7413
GO Biological Processes	GO:0042391	regulation of membrane potential	19	-7.64006	M1	1	0	19_GO:0065007 biological regulation	-7.64006	6.75333	8.36949	27994	443	131	14	10.687	2.69929	142|153|154|207|581|596|598|857|1812|2697|2932|3725|5530|6647	PARP1|ADRB1|ADRB2|AKT1|BAX|BCL2|BCL2L1|CAV1|DRD1|GJA1|GSK3B|JUN|PPP3CA|SOD1	-6.18959	0	34	0	0	-16.3055	17.9743
GO Biological Processes	GO:0030308	negative regulation of cell growth	19	-7.63486	M1	1	0	19_GO:0040007 growth	-7.63486	11.2471	9.71785	27994	190	131	10	7.63359	2.31999	596|1026|2100|2697|5465|5467|5468|5925|6696|7157	BCL2|CDKN1A|ESR2|GJA1|PPARA|PPARD|PPARG|RB1|SPP1|TP53	-6.18745	0	26	0	0	-18.934	11.7784
GO Biological Processes	GO:0043534	blood vessel endothelial cell migration	19	-7.63486	M1	1	0	19_GO:0040011 locomotion	-7.63486	11.2471	9.71785	27994	190	131	10	7.63359	2.31999	207|3091|3162|3315|4780|5468|5578|5743|7124|7422	AKT1|HIF1A|HMOX1|HSPB1|NFE2L2|PPARG|PRKCA|PTGS2|TNF|VEGFA	-6.18745	0	13	0	0	-25.4494	21.3695
GO Biological Processes	GO:0010573	vascular endothelial growth factor production	19	-7.63406	M1	1	0	19_GO:0032501 multicellular organismal process	-7.63406	23.0133	12.1832	27994	65	131	7	5.34351	1.96496	1545|3091|3552|3553|3572|5743|7124	CYP1B1|HIF1A|IL1A|IL1B|IL6ST|PTGS2|TNF	-6.18745	0	11	0	0	-26.7386	213.695
GO Biological Processes	GO:0035794	positive regulation of mitochondrial membrane permeability	19	-7.63406	M1	1	0	19_GO:0071840 cellular component organization or biogenesis	-7.63406	23.0133	12.1832	27994	65	131	7	5.34351	1.96496	581|596|841|1869|2932|5599|7157	BAX|BCL2|CASP8|E2F1|GSK3B|MAPK8|TP53	-6.18745	0	53	0	0	-12.5473	42.7389
GO Biological Processes	GO:1905953	negative regulation of lipid localization	19	-7.63406	M1	1	0	19_GO:0048519 negative regulation of biological process	-7.63406	23.0133	12.1832	27994	65	131	7	5.34351	1.96496	207|1950|4792|5465|5467|5468|7124	AKT1|EGF|NFKBIA|PPARA|PPARD|PPARG|TNF	-6.18745	0	73	0	0	-9.68214	64.1084
GO Biological Processes	GO:0002687	positive regulation of leukocyte migration	19	-7.61808	M1	1	0	19_GO:0040011 locomotion	-7.61808	13.544	10.2754	27994	142	131	9	6.87023	2.21001	2155|3383|3576|3627|5054|5594|6401|7124|7422	F7|ICAM1|CXCL8|CXCL10|SERPINE1|MAPK1|SELE|TNF|VEGFA	-6.17301	0	42	0	0	-14.4051	14.5229
GO Biological Processes	GO:0007006	mitochondrial membrane organization	19	-7.61808	M1	1	0	19_GO:0071840 cellular component organization or biogenesis	-7.61808	13.544	10.2754	27994	142	131	9	6.87023	2.21001	581|596|598|841|1869|2932|3099|5599|7157	BAX|BCL2|BCL2L1|CASP8|E2F1|GSK3B|HK2|MAPK8|TP53	-6.17301	0	53	0	0	-12.5473	42.7389
GO Biological Processes	GO:0044772	mitotic cell cycle phase transition	19	-7.61571	M1	1	0	19_GO:0009987 cellular process	-7.61571	5.67959	7.95868	27994	602	131	16	12.2137	2.8609	207|581|595|596|891|983|1017|1026|1543|1869|1956|4609|5530|5925|6347|7157	AKT1|BAX|CCND1|BCL2|CCNB1|CDK1|CDK2|CDKN1A|CYP1A1|E2F1|EGFR|MYC|PPP3CA|RB1|CCL2|TP53	-6.1714	0	50	0	0	-12.7295	29.3306
GO Biological Processes	GO:1901361	organic cyclic compound catabolic process	19	-7.60474	M1	1	0	19_GO:0008152 metabolic process	-7.60474	4.95046	7.65745	27994	777	131	18	13.7405	3.00794	207|581|836|1543|1544|1576|1869|2475|3091|3099|3162|3315|3458|4780|5465|5578|6696|7157	AKT1|BAX|CASP3|CYP1A1|CYP1A2|CYP3A4|E2F1|MTOR|HIF1A|HK2|HMOX1|HSPB1|IFNG|NFE2L2|PPARA|PRKCA|SPP1|TP53	-6.1612	0	9	0	0	-26.9935	25.1405
GO Biological Processes	GO:0046824	positive regulation of nucleocytoplasmic transport	19	-7.58705	M1	1	0	19_GO:0048518 positive regulation of biological process	-7.58705	22.6646	12.0823	27994	66	131	7	5.34351	1.96496	983|2932|3458|3553|5594|5743|7157	CDK1|GSK3B|IFNG|IL1B|MAPK1|PTGS2|TP53	-6.14503	0	72	0	0	-9.79486	22.6646
GO Biological Processes	GO:1902108	regulation of mitochondrial membrane permeability involved in apoptotic process	19	-7.58705	M1	1	0	19_GO:0071840 cellular component organization or biogenesis	-7.58705	22.6646	12.0823	27994	66	131	7	5.34351	1.96496	581|596|841|1869|2932|5599|7157	BAX|BCL2|CASP8|E2F1|GSK3B|MAPK8|TP53	-6.14503	0	53	0	0	-12.5473	42.7389
GO Biological Processes	GO:0019217	regulation of fatty acid metabolic process	19	-7.58498	M1	1	0	19_GO:0050789 regulation of biological process	-7.58498	16.9263	10.9945	27994	101	131	8	6.10687	2.09214	207|857|2475|3553|5465|5467|5468|5743	AKT1|CAV1|MTOR|IL1B|PPARA|PPARD|PPARG|PTGS2	-6.14447	0	73	0	0	-9.68214	64.1084
GO Biological Processes	GO:0044773	mitotic DNA damage checkpoint	19	-7.58498	M1	1	0	19_GO:0048519 negative regulation of biological process	-7.58498	16.9263	10.9945	27994	101	131	8	6.10687	2.09214	581|595|891|983|1017|1026|1869|7157	BAX|CCND1|CCNB1|CDK1|CDK2|CDKN1A|E2F1|TP53	-6.14447	0	50	0	0	-12.7295	29.3306
GO Biological Processes	GO:1901990	regulation of mitotic cell cycle phase transition	19	-7.57934	M1	1	0	19_GO:0050789 regulation of biological process	-7.57934	6.67796	8.30708	27994	448	131	14	10.687	2.69929	207|581|595|596|891|983|1017|1026|1543|1869|1956|5925|6347|7157	AKT1|BAX|CCND1|BCL2|CCNB1|CDK1|CDK2|CDKN1A|CYP1A1|E2F1|EGFR|RB1|CCL2|TP53	-6.1396	0	50	0	0	-12.7295	29.3306
GO Biological Processes	GO:0051052	regulation of DNA metabolic process	19	-7.54329	M1	1	0	19_GO:0050789 regulation of biological process	-7.54329	6.63354	8.27009	27994	451	131	14	10.687	2.69929	142|207|581|983|1017|1026|1950|1956|2697|3725|4609|5468|5594|7157	PARP1|AKT1|BAX|CDK1|CDK2|CDKN1A|EGF|EGFR|GJA1|JUN|MYC|PPARG|MAPK1|TP53	-6.1043	0	50	0	0	-12.7295	29.3306
GO Biological Processes	GO:1905710	positive regulation of membrane permeability	19	-7.54081	M1	1	0	19_GO:0065007 biological regulation	-7.54081	22.3263	11.9836	27994	67	131	7	5.34351	1.96496	581|596|841|1869|2932|5599|7157	BAX|BCL2|CASP8|E2F1|GSK3B|MAPK8|TP53	-6.10258	0	53	0	0	-12.5473	42.7389
GO Biological Processes	GO:0050731	positive regulation of peptidyl-tyrosine phosphorylation	19	-7.52787	M1	1	0	19_GO:0048518 positive regulation of biological process	-7.52787	10.9587	9.56868	27994	195	131	10	7.63359	2.31999	1950|2475|3383|3458|3481|3572|7124|7157|7422|653361	EGF|MTOR|ICAM1|IFNG|IGF2|IL6ST|TNF|TP53|VEGFA|NCF1	-6.09039	0	77	0	0	-9.24192	27.7012
GO Biological Processes	GO:1901991	negative regulation of mitotic cell cycle phase transition	19	-7.52628	M1	1	0	19_GO:0048519 negative regulation of biological process	-7.52628	9.3651	9.12805	27994	251	131	11	8.39695	2.42315	581|595|596|891|983|1017|1026|1869|5925|6347|7157	BAX|CCND1|BCL2|CCNB1|CDK1|CDK2|CDKN1A|E2F1|RB1|CCL2|TP53	-6.08955	0	50	0	0	-12.7295	29.3306
GO Biological Processes	GO:0060965	negative regulation of gene silencing by miRNA	19	-7.51638	M1	1	0	19_GO:0048519 negative regulation of biological process	-7.51638	53.4237	16.0809	27994	20	131	5	3.81679	1.67403	2099|5468|5530|7124|7157	ESR1|PPARG|PPP3CA|TNF|TP53	-6.0804	0	99	1	1	-7.51638	61.0556
GO Biological Processes	GO:0060759	regulation of response to cytokine stimulus	19	-7.50684	M1	1	0	19_GO:0050896 response to stimulus	-7.50684	10.9028	9.53949	27994	196	131	10	7.63359	2.31999	841|857|1147|2950|3091|3458|3551|5468|6772|7124	CASP8|CAV1|CHUK|GSTP1|HIF1A|IFNG|IKBKB|PPARG|STAT1|TNF	-6.07161	0	24	0	0	-19.0213	42.7389
GO Biological Processes	GO:2000273	positive regulation of signaling receptor activity	19	-7.50141	M1	1	0	19_GO:0023052 signaling	-7.50141	32.0542	13.4764	27994	40	131	6	4.58015	1.82652	152|154|1950|3458|6347|653361	ADRA2C|ADRB2|EGF|IFNG|CCL2|NCF1	-6.06693	0	100	1	1	-7.50141	42.7389
GO Biological Processes	GO:0048662	negative regulation of smooth muscle cell proliferation	19	-7.45054	M1	1	0	19_GO:0008283 cell proliferation	-7.45054	21.6792	11.7925	27994	69	131	7	5.34351	1.96496	1026|2950|3162|3458|3486|5467|5468	CDKN1A|GSTP1|HMOX1|IFNG|IGFBP3|PPARD|PPARG	-6.01755	0	21	0	0	-19.9812	24.8965
GO Biological Processes	GO:0071230	cellular response to amino acid stimulus	19	-7.45054	M1	1	0	19_GO:0050896 response to stimulus	-7.45054	21.6792	11.7925	27994	69	131	7	5.34351	1.96496	598|1277|1281|1956|2475|4313|7124	BCL2L1|COL1A1|COL3A1|EGFR|MTOR|MMP2|TNF	-6.01755	0	14	0	0	-24.5508	24.3687
GO Biological Processes	GO:0071236	cellular response to antibiotic	19	-7.43655	M1	1	0	19_GO:0050896 response to stimulus	-7.43655	12.9077	9.99298	27994	149	131	9	6.87023	2.21001	196|983|1545|1728|3309|4780|5321|5970|7157	AHR|CDK1|CYP1B1|NQO1|HSPA5|NFE2L2|PLA2G4A|RELA|TP53	-6.00431	0	101	1	1	-7.43655	12.9077
GO Biological Processes	GO:0043112	receptor metabolic process	19	-7.42388	M1	1	0	19_GO:0008152 metabolic process	-7.42388	10.6847	9.42483	27994	200	131	10	7.63359	2.31999	857|1950|3091|3458|3576|5465|5468|6401|7124|7422	CAV1|EGF|HIF1A|IFNG|CXCL8|PPARA|PPARG|SELE|TNF|VEGFA	-5.99238	0	102	1	1	-7.42388	36.8439
GO Biological Processes	GO:0048872	homeostasis of number of cells	19	-7.42142	M1	1	0	19_GO:0065007 biological regulation	-7.42142	9.14646	8.99606	27994	257	131	11	8.39695	2.42315	207|581|596|836|3091|3162|3559|5925|6647|6772|7422	AKT1|BAX|BCL2|CASP3|HIF1A|HMOX1|IL2RA|RB1|SOD1|STAT1|VEGFA	-5.99066	0	103	1	1	-7.42142	11.0294
GO Biological Processes	GO:0071156	regulation of cell cycle arrest	19	-7.41962	M1	1	0	19_GO:0048519 negative regulation of biological process	-7.41962	16.1279	10.6996	27994	106	131	8	6.10687	2.09214	581|595|891|983|1017|1026|1869|7157	BAX|CCND1|CCNB1|CDK1|CDK2|CDKN1A|E2F1|TP53	-5.9896	0	50	0	0	-12.7295	29.3306
GO Biological Processes	GO:0042698	ovulation cycle	19	-7.40647	M1	1	0	19_GO:0048511 rhythmic process	-7.40647	21.3695	11.7	27994	70	131	7	5.34351	1.96496	836|1956|2099|3037|3309|5241|8648	CASP3|EGFR|ESR1|HAS2|HSPA5|PGR|NCOA1	-5.97719	0	68	0	0	-10.3658	26.2432
GO Biological Processes	GO:0042180	cellular ketone metabolic process	19	-7.37001	M1	1	0	19_GO:0008152 metabolic process	-7.37001	9.04093	8.93168	27994	260	131	11	8.39695	2.42315	207|231|857|1728|2475|3553|4953|5465|5467|5468|5743	AKT1|AKR1B1|CAV1|NQO1|MTOR|IL1B|ODC1|PPARA|PPARD|PPARG|PTGS2	-5.94169	0	73	0	0	-9.68214	64.1084
GO Biological Processes	GO:0042692	muscle cell differentiation	19	-7.3695	M1	1	0	19_GO:0032502 developmental process	-7.3695	7.08681	8.32164	27994	392	131	13	9.92366	2.6122	207|596|836|891|983|1147|2475|3481|3627|5465|5530|5925|7422	AKT1|BCL2|CASP3|CCNB1|CDK1|CHUK|MTOR|IGF2|CXCL10|PPARA|PPP3CA|RB1|VEGFA	-5.94169	0	63	0	0	-11.069	71.2316
GO Biological Processes	GO:0044774	mitotic DNA integrity checkpoint	19	-7.35584	M1	1	0	19_GO:0048519 negative regulation of biological process	-7.35584	15.8292	10.5873	27994	108	131	8	6.10687	2.09214	581|595|891|983|1017|1026|1869|7157	BAX|CCND1|CCNB1|CDK1|CDK2|CDKN1A|E2F1|TP53	-5.92877	0	50	0	0	-12.7295	29.3306
GO Biological Processes	GO:0045834	positive regulation of lipid metabolic process	19	-7.33698	M1	1	0	19_GO:0048518 positive regulation of biological process	-7.33698	12.5703	9.83996	27994	153	131	9	6.87023	2.21001	207|2475|3458|3553|5465|5467|5468|5743|7124	AKT1|MTOR|IFNG|IL1B|PPARA|PPARD|PPARG|PTGS2|TNF	-5.91064	0	73	0	0	-9.68214	64.1084
GO Biological Processes	GO:0010888	negative regulation of lipid storage	19	-7.28957	M1	1	0	19_GO:0048519 negative regulation of biological process	-7.28957	48.567	15.3039	27994	22	131	5	3.81679	1.67403	4792|5465|5467|5468|7124	NFKBIA|PPARA|PPARD|PPARG|TNF	-5.8647	0	73	0	0	-9.68214	64.1084
GO Biological Processes	GO:0042359	vitamin D metabolic process	19	-7.28957	M1	1	0	19_GO:0008152 metabolic process	-7.28957	48.567	15.3039	27994	22	131	5	3.81679	1.67403	1543|1576|3458|3553|7124	CYP1A1|CYP3A4|IFNG|IL1B|TNF	-5.8647	0	11	0	0	-26.7386	213.695
GO Biological Processes	GO:0017038	protein import	19	-7.28303	M1	1	0	19_GO:0051179 localization	-7.28303	10.3234	9.23179	27994	207	131	10	7.63359	2.31999	207|983|1026|1812|3458|4792|5530|5594|5743|7157	AKT1|CDK1|CDKN1A|DRD1|IFNG|NFKBIA|PPP3CA|MAPK1|PTGS2|TP53	-5.85889	0	72	0	0	-9.79486	22.6646
GO Biological Processes	GO:0072401	signal transduction involved in DNA integrity checkpoint	19	-7.27824	M1	1	0	19_GO:0048519 negative regulation of biological process	-7.27824	20.4913	11.4336	27994	73	131	7	5.34351	1.96496	581|891|983|1017|1026|1869|7157	BAX|CCNB1|CDK1|CDK2|CDKN1A|E2F1|TP53	-5.85556	0	50	0	0	-12.7295	29.3306
GO Biological Processes	GO:0072422	signal transduction involved in DNA damage checkpoint	19	-7.27824	M1	1	0	19_GO:0048519 negative regulation of biological process	-7.27824	20.4913	11.4336	27994	73	131	7	5.34351	1.96496	581|891|983|1017|1026|1869|7157	BAX|CCNB1|CDK1|CDK2|CDKN1A|E2F1|TP53	-5.85556	0	50	0	0	-12.7295	29.3306
GO Biological Processes	GO:0034284	response to monosaccharide	19	-7.26334	M1	1	0	19_GO:0050896 response to stimulus	-7.26334	10.2738	9.20496	27994	208	131	10	7.63359	2.31999	836|847|2697|2950|3091|3383|5467|5530|5743|5894	CASP3|CAT|GJA1|GSTP1|HIF1A|ICAM1|PPARD|PPP3CA|PTGS2|RAF1	-5.84139	0	81	0	0	-8.93589	10.9587
GO Biological Processes	GO:1904659	glucose transmembrane transport	19	-7.26254	M1	1	0	19_GO:0051179 localization	-7.26254	15.4014	10.4242	27994	111	131	8	6.10687	2.09214	207|1812|3099|3553|4780|5467|5579|7124	AKT1|DRD1|HK2|IL1B|NFE2L2|PPARD|PRKCB|TNF	-5.84131	0	104	1	1	-7.26254	29.1402
GO Biological Processes	GO:0043406	positive regulation of MAP kinase activity	19	-7.2526	M1	1	0	19_GO:0048518 positive regulation of biological process	-7.2526	8.8039	8.78542	27994	267	131	11	8.39695	2.42315	959|983|1950|1956|2064|3553|5594|5894|6647|7124|7422	CD40LG|CDK1|EGF|EGFR|ERBB2|IL1B|MAPK1|RAF1|SOD1|TNF|VEGFA	-5.83209	0	35	0	0	-16.3031	20.6801
GO Biological Processes	GO:0002790	peptide secretion	19	-7.2493	M1	1	0	19_GO:0051179 localization	-7.2493	5.76514	7.78186	27994	556	131	15	11.4504	2.78207	152|240|959|1803|1956|2697|3091|3458|3552|3553|5467|5530|5578|5894|7124	ADRA2C|ALOX5|CD40LG|DPP4|EGFR|GJA1|HIF1A|IFNG|IL1A|IL1B|PPARD|PPP3CA|PRKCA|RAF1|TNF	-5.82951	0	40	0	0	-14.7066	12.987
GO Biological Processes	GO:0051121	hepoxilin metabolic process	19	-7.24668	M1	1	0	19_GO:0008152 metabolic process	-7.24668	94.9754	19.3339	27994	9	131	4	3.05344	1.50323	240|2944|2946|2950	ALOX5|GSTM1|GSTM2|GSTP1	-5.82834	0	105	1	1	-7.24668	94.9754
GO Biological Processes	GO:0051122	hepoxilin biosynthetic process	19	-7.24668	M1	1	0	19_GO:0008152 metabolic process	-7.24668	94.9754	19.3339	27994	9	131	4	3.05344	1.50323	240|2944|2946|2950	ALOX5|GSTM1|GSTM2|GSTP1	-5.82834	0	105	0	0	-7.24668	94.9754
GO Biological Processes	GO:0032881	regulation of polysaccharide metabolic process	19	-7.24346	M1	1	0	19_GO:0050789 regulation of biological process	-7.24346	29.1402	12.8088	27994	44	131	6	4.58015	1.82652	207|1950|2475|2932|3037|3481	AKT1|EGF|MTOR|GSK3B|HAS2|IGF2	-5.82648	0	29	0	0	-18.4437	33.7413
GO Biological Processes	GO:0070371	ERK1 and ERK2 cascade	19	-7.24338	M1	1	0	19_GO:0023052 signaling	-7.24338	7.7239	8.45075	27994	332	131	12	9.16031	2.52033	1950|1956|2064|2950|3383|3553|3725|4609|5578|5594|6347|7124	EGF|EGFR|ERBB2|GSTP1|ICAM1|IL1B|JUN|MYC|PRKCA|MAPK1|CCL2|TNF	-5.82648	0	94	0	0	-7.93374	25.3536
GO Biological Processes	GO:0072395	signal transduction involved in cell cycle checkpoint	19	-7.23677	M1	1	0	19_GO:0048519 negative regulation of biological process	-7.23677	20.2144	11.3483	27994	74	131	7	5.34351	1.96496	581|891|983|1017|1026|1869|7157	BAX|CCNB1|CDK1|CDK2|CDKN1A|E2F1|TP53	-5.82058	0	50	0	0	-12.7295	29.3306
GO Biological Processes	GO:1901988	negative regulation of cell cycle phase transition	19	-7.20334	M1	1	0	19_GO:0048519 negative regulation of biological process	-7.20334	8.70608	8.72436	27994	270	131	11	8.39695	2.42315	581|595|596|891|983|1017|1026|1869|5925|6347|7157	BAX|CCND1|BCL2|CCNB1|CDK1|CDK2|CDKN1A|E2F1|RB1|CCL2|TP53	-5.78787	0	50	0	0	-12.7295	29.3306
GO Biological Processes	GO:0043393	regulation of protein binding	19	-7.18563	M1	1	0	19_GO:0065007 biological regulation	-7.18563	10.0799	9.09946	27994	212	131	10	7.63359	2.31999	154|207|581|857|1026|2932|4318|5465|5599|6590	ADRB2|AKT1|BAX|CAV1|CDKN1A|GSK3B|MMP9|PPARA|MAPK8|SLPI	-5.77354	0	34	0	0	-16.3055	17.9743
GO Biological Processes	GO:0044770	cell cycle phase transition	19	-7.18526	M1	1	0	19_GO:0009987 cellular process	-7.18526	5.28457	7.5605	27994	647	131	16	12.2137	2.8609	207|581|595|596|891|983|1017|1026|1543|1869|1956|4609|5530|5925|6347|7157	AKT1|BAX|CCND1|BCL2|CCNB1|CDK1|CDK2|CDKN1A|CYP1A1|E2F1|EGFR|MYC|PPP3CA|RB1|CCL2|TP53	-5.77354	0	50	0	0	-12.7295	29.3306
GO Biological Processes	GO:0060149	negative regulation of posttranscriptional gene silencing	19	-7.18474	M1	1	0	19_GO:0048519 negative regulation of biological process	-7.18474	46.4554	14.9535	27994	23	131	5	3.81679	1.67403	2099|5468|5530|7124|7157	ESR1|PPARG|PPP3CA|TNF|TP53	-5.77354	0	99	0	0	-7.51638	61.0556
GO Biological Processes	GO:0060967	negative regulation of gene silencing by RNA	19	-7.18474	M1	1	0	19_GO:0048519 negative regulation of biological process	-7.18474	46.4554	14.9535	27994	23	131	5	3.81679	1.67403	2099|5468|5530|7124|7157	ESR1|PPARG|PPP3CA|TNF|TP53	-5.77354	0	99	0	0	-7.51638	61.0556
GO Biological Processes	GO:1903798	regulation of production of miRNAs involved in gene silencing by miRNA	19	-7.18474	M1	1	0	19_GO:0048519 negative regulation of biological process	-7.18474	46.4554	14.9535	27994	23	131	5	3.81679	1.67403	1956|2099|5530|7124|7157	EGFR|ESR1|PPP3CA|TNF|TP53	-5.77354	0	99	0	0	-7.51638	61.0556
GO Biological Processes	GO:1904996	positive regulation of leukocyte adhesion to vascular endothelial cell	19	-7.18474	M1	1	0	19_GO:0022610 biological adhesion	-7.18474	46.4554	14.9535	27994	23	131	5	3.81679	1.67403	240|3383|5970|6401|7124	ALOX5|ICAM1|RELA|SELE|TNF	-5.77354	0	106	1	1	-7.18474	46.4554
GO Biological Processes	GO:0006775	fat-soluble vitamin metabolic process	19	-7.18298	M1	1	0	19_GO:0008152 metabolic process	-7.18298	28.4926	12.6557	27994	45	131	6	4.58015	1.82652	1543|1576|3458|3553|5467|7124	CYP1A1|CYP3A4|IFNG|IL1B|PPARD|TNF	-5.77319	0	11	0	0	-26.7386	213.695
GO Biological Processes	GO:0034105	positive regulation of tissue remodeling	19	-7.18298	M1	1	0	19_GO:0048518 positive regulation of biological process	-7.18298	28.4926	12.6557	27994	45	131	6	4.58015	1.82652	581|760|1956|5530|5578|6696	BAX|CA2|EGFR|PPP3CA|PRKCA|SPP1	-5.77319	0	45	0	0	-13.7627	44.9883
GO Biological Processes	GO:0007517	muscle organ development	19	-7.1799	M1	1	0	19_GO:0032502 developmental process	-7.1799	6.82563	8.11772	27994	407	131	13	9.92366	2.6122	596|857|891|983|1281|2353|2475|2697|3627|5465|5530|5594|5925	BCL2|CAV1|CCNB1|CDK1|COL3A1|FOS|MTOR|GJA1|CXCL10|PPARA|PPP3CA|MAPK1|RB1	-5.77083	0	63	0	0	-11.069	71.2316
GO Biological Processes	GO:0008645	hexose transmembrane transport	19	-7.17196	M1	1	0	19_GO:0051179 localization	-7.17196	14.9961	10.2674	27994	114	131	8	6.10687	2.09214	207|1812|3099|3553|4780|5467|5579|7124	AKT1|DRD1|HK2|IL1B|NFE2L2|PPARD|PRKCB|TNF	-5.76429	0	104	0	0	-7.26254	29.1402
GO Biological Processes	GO:0016101	diterpenoid metabolic process	19	-7.17196	M1	1	0	19_GO:0008152 metabolic process	-7.17196	14.9961	10.2674	27994	114	131	8	6.10687	2.09214	125|231|1543|1544|1545|1576|1956|5467	ADH1B|AKR1B1|CYP1A1|CYP1A2|CYP1B1|CYP3A4|EGFR|PPARD	-5.76429	0	39	0	0	-14.9141	64.1084
GO Biological Processes	GO:0044089	positive regulation of cellular component biogenesis	19	-7.15872	M1	1	0	19_GO:0048518 positive regulation of biological process	-7.15872	5.67331	7.69467	27994	565	131	15	11.4504	2.78207	142|581|857|2099|2475|2932|3383|3458|3725|4312|4314|5578|7124|7157|7422	PARP1|BAX|CAV1|ESR1|MTOR|GSK3B|ICAM1|IFNG|JUN|MMP1|MMP3|PRKCA|TNF|TP53|VEGFA	-5.75175	0	15	0	0	-24.5132	30.8425
GO Biological Processes	GO:0060537	muscle tissue development	19	-7.14295	M1	1	0	19_GO:0032502 developmental process	-7.14295	6.77568	8.07817	27994	410	131	13	9.92366	2.6122	596|857|891|983|1281|2353|2475|2697|5465|5530|5594|5925|7422	BCL2|CAV1|CCNB1|CDK1|COL3A1|FOS|MTOR|GJA1|PPARA|PPP3CA|MAPK1|RB1|VEGFA	-5.73737	0	63	0	0	-11.069	71.2316
GO Biological Processes	GO:0043620	regulation of DNA-templated transcription in response to stress	19	-7.14234	M1	1	0	19_GO:0050896 response to stimulus	-7.14234	14.8657	10.2164	27994	115	131	8	6.10687	2.09214	3091|3162|3309|3725|4780|5970|7157|7422	HIF1A|HMOX1|HSPA5|JUN|NFE2L2|RELA|TP53|VEGFA	-5.73737	0	79	0	0	-9.05318	142.463
GO Biological Processes	GO:1901987	regulation of cell cycle phase transition	19	-7.14223	M1	1	0	19_GO:0050789 regulation of biological process	-7.14223	6.15581	7.86199	27994	486	131	14	10.687	2.69929	207|581|595|596|891|983|1017|1026|1543|1869|1956|5925|6347|7157	AKT1|BAX|CCND1|BCL2|CCNB1|CDK1|CDK2|CDKN1A|CYP1A1|E2F1|EGFR|RB1|CCL2|TP53	-5.73737	0	50	0	0	-12.7295	29.3306
GO Biological Processes	GO:0045927	positive regulation of growth	19	-7.1386	M1	1	0	19_GO:0040007 growth	-7.1386	8.57898	8.64442	27994	274	131	11	8.39695	2.42315	207|596|891|983|1956|2064|2475|3481|5467|5594|7422	AKT1|BCL2|CCNB1|CDK1|EGFR|ERBB2|MTOR|IGF2|PPARD|MAPK1|VEGFA	-5.73443	0	63	0	0	-11.069	71.2316
GO Biological Processes	GO:0014015	positive regulation of gliogenesis	19	-7.11591	M1	1	0	19_GO:0048518 positive regulation of biological process	-7.11591	19.4268	11.1021	27994	77	131	7	5.34351	1.96496	1869|2475|3553|3572|5468|5970|7124	E2F1|MTOR|IL1B|IL6ST|PPARG|RELA|TNF	-5.71383	0	48	0	0	-13.0283	19.4268
GO Biological Processes	GO:0033555	multicellular organismal response to stress	19	-7.11591	M1	1	0	19_GO:0032501 multicellular organismal process	-7.11591	19.4268	11.1021	27994	77	131	7	5.34351	1.96496	153|596|1803|1812|2697|5530|6530	ADRB1|BCL2|DPP4|DRD1|GJA1|PPP3CA|SLC6A2	-5.71383	0	107	1	1	-7.11591	25.4398
GO Biological Processes	GO:1903201	regulation of oxidative stress-induced cell death	19	-7.11591	M1	1	0	19_GO:0050896 response to stimulus	-7.11591	19.4268	11.1021	27994	77	131	7	5.34351	1.96496	142|207|3091|3315|4314|4780|6647	PARP1|AKT1|HIF1A|HSPB1|MMP3|NFE2L2|SOD1	-5.71383	0	33	0	0	-17.1314	47.4877
GO Biological Processes	GO:0015749	monosaccharide transmembrane transport	19	-7.11301	M1	1	0	19_GO:0051179 localization	-7.11301	14.7376	10.1661	27994	116	131	8	6.10687	2.09214	207|1812|3099|3553|4780|5467|5579|7124	AKT1|DRD1|HK2|IL1B|NFE2L2|PPARD|PRKCB|TNF	-5.71162	0	104	0	0	-7.26254	29.1402
GO Biological Processes	GO:0055065	metal ion homeostasis	19	-7.09446	M1	1	0	19_GO:0065007 biological regulation	-7.09446	5.20413	7.47705	27994	657	131	16	12.2137	2.8609	581|596|857|1812|1956|2099|2697|2946|3091|3162|3627|4609|5579|6373|6647|9429	BAX|BCL2|CAV1|DRD1|EGFR|ESR1|GJA1|GSTM2|HIF1A|HMOX1|CXCL10|MYC|PRKCB|CXCL11|SOD1|ABCG2	-5.69377	0	59	0	0	-11.5248	26.7118
GO Biological Processes	GO:0036003	positive regulation of transcription from RNA polymerase II promoter in response to stress	19	-7.08491	M1	1	0	19_GO:0048518 positive regulation of biological process	-7.08491	44.5197	14.6249	27994	24	131	5	3.81679	1.67403	3091|3309|4780|7157|7422	HIF1A|HSPA5|NFE2L2|TP53|VEGFA	-5.68531	0	79	0	0	-9.05318	142.463
GO Biological Processes	GO:0043500	muscle adaptation	19	-7.08394	M1	1	0	19_GO:0032501 multicellular organismal process	-7.08394	14.6116	10.1164	27994	117	131	8	6.10687	2.09214	142|2475|3162|3553|3572|5465|5530|5578	PARP1|MTOR|HMOX1|IL1B|IL6ST|PPARA|PPP3CA|PRKCA	-5.68531	0	61	0	0	-11.228	26.7118
GO Biological Processes	GO:0051341	regulation of oxidoreductase activity	19	-7.08394	M1	1	0	19_GO:0050789 regulation of biological process	-7.08394	14.6116	10.1164	27994	117	131	8	6.10687	2.09214	207|857|1956|3091|3458|3552|3553|7124	AKT1|CAV1|EGFR|HIF1A|IFNG|IL1A|IL1B|TNF	-5.68531	0	11	0	0	-26.7386	213.695
GO Biological Processes	GO:0042572	retinol metabolic process	19	-7.06629	M1	1	0	19_GO:0008152 metabolic process	-7.06629	27.2802	12.3639	27994	47	131	6	4.58015	1.82652	125|231|1543|1544|1545|1576	ADH1B|AKR1B1|CYP1A1|CYP1A2|CYP1B1|CYP3A4	-5.66904	0	39	0	0	-14.9141	64.1084
GO Biological Processes	GO:0070849	response to epidermal growth factor	19	-7.06629	M1	1	0	19_GO:0050896 response to stimulus	-7.06629	27.2802	12.3639	27994	47	131	6	4.58015	1.82652	207|1277|1956|2064|2950|5594	AKT1|COL1A1|EGFR|ERBB2|GSTP1|MAPK1	-5.66904	0	108	1	1	-7.06629	33.7413
GO Biological Processes	GO:0007569	cell aging	19	-7.05515	M1	1	0	19_GO:0032502 developmental process	-7.05515	14.4878	10.0673	27994	118	131	8	6.10687	2.09214	596|983|1026|2475|3383|5054|6647|7157	BCL2|CDK1|CDKN1A|MTOR|ICAM1|SERPINE1|SOD1|TP53	-5.65927	0	83	0	0	-8.8504	45.7917
GO Biological Processes	GO:0034219	carbohydrate transmembrane transport	19	-7.05515	M1	1	0	19_GO:0051179 localization	-7.05515	14.4878	10.0673	27994	118	131	8	6.10687	2.09214	207|1812|3099|3553|4780|5467|5579|7124	AKT1|DRD1|HK2|IL1B|NFE2L2|PPARD|PRKCB|TNF	-5.65927	0	104	0	0	-7.26254	29.1402
GO Biological Processes	GO:0000075	cell cycle checkpoint	19	-7.05348	M1	1	0	19_GO:0048519 negative regulation of biological process	-7.05348	9.75775	8.92142	27994	219	131	10	7.63359	2.31999	581|595|598|891|983|1017|1026|1869|5925|7157	BAX|CCND1|BCL2L1|CCNB1|CDK1|CDK2|CDKN1A|E2F1|RB1|TP53	-5.65828	0	50	0	0	-12.7295	29.3306
GO Biological Processes	GO:0002274	myeloid leukocyte activation	19	-7.03189	M1	1	0	19_GO:0002376 immune system process	-7.03189	5.14927	7.41963	27994	664	131	16	12.2137	2.8609	240|847|1509|2950|3162|3458|3576|3725|4048|4318|4353|5321|5328|5594|6590|7124	ALOX5|CAT|CTSD|GSTP1|HMOX1|IFNG|CXCL8|JUN|LTA4H|MMP9|MPO|PLA2G4A|PLAU|MAPK1|SLPI|TNF	-5.63737	0	80	0	0	-8.9986	5.35576
GO Biological Processes	GO:0001660	fever generation	19	-7.02641	M1	1	0	19_GO:0032501 multicellular organismal process	-7.02641	85.4779	18.3204	27994	10	131	4	3.05344	1.50323	3552|3553|5743|7124	IL1A|IL1B|PTGS2|TNF	-5.63257	0	11	0	0	-26.7386	213.695
GO Biological Processes	GO:1904646	cellular response to amyloid-beta	19	-7.00996	M1	1	0	19_GO:0050896 response to stimulus	-7.00996	26.7118	12.2248	27994	48	131	6	4.58015	1.82652	142|154|2697|2932|3383|7412	PARP1|ADRB2|GJA1|GSK3B|ICAM1|VCAM1	-5.61861	0	62	0	0	-11.0758	32.5975
GO Biological Processes	GO:2001239	regulation of extrinsic apoptotic signaling pathway in absence of ligand	19	-7.00996	M1	1	0	19_GO:0023052 signaling	-7.00996	26.7118	12.2248	27994	48	131	6	4.58015	1.82652	207|596|598|3552|3553|7124	AKT1|BCL2|BCL2L1|IL1A|IL1B|TNF	-5.61861	0	58	0	0	-11.6428	35.6158
GO Biological Processes	GO:0042129	regulation of T cell proliferation	19	-7.00973	M1	1	0	19_GO:0008283 cell proliferation	-7.00973	11.5165	9.34635	27994	167	131	9	6.87023	2.21001	836|959|2064|3481|3552|3553|3559|3572|7412	CASP3|CD40LG|ERBB2|IGF2|IL1A|IL1B|IL2RA|IL6ST|VCAM1	-5.61861	0	20	0	0	-20.2541	16.3681
GO Biological Processes	GO:0071695	anatomical structure maturation	19	-7.00973	M1	1	0	19_GO:0032502 developmental process	-7.00973	11.5165	9.34635	27994	167	131	9	6.87023	2.21001	231|596|891|1026|2475|3091|4313|5241|5925	AKR1B1|BCL2|CCNB1|CDKN1A|MTOR|HIF1A|MMP2|PGR|RB1	-5.61861	0	51	0	0	-12.6756	53.4237
GO Biological Processes	GO:0060557	positive regulation of vitamin D biosynthetic process	19	-6.99934	M1	1	0	19_GO:0048518 positive regulation of biological process	-6.99934	213.695	25.2612	27994	3	131	3	2.29008	1.30695	3458|3553|7124	IFNG|IL1B|TNF	-5.60957	0	11	0	0	-26.7386	213.695
GO Biological Processes	GO:0060559	positive regulation of calcidiol 1-monooxygenase activity	19	-6.99934	M1	1	0	19_GO:0048518 positive regulation of biological process	-6.99934	213.695	25.2612	27994	3	131	3	2.29008	1.30695	3458|3553|7124	IFNG|IL1B|TNF	-5.60957	0	11	0	0	-26.7386	213.695
GO Biological Processes	GO:0046697	decidualization	19	-6.98963	M1	1	0	19_GO:0022414 reproductive process	-6.98963	42.7389	14.3159	27994	25	131	5	3.81679	1.67403	2697|5467|5594|5743|6696	GJA1|PPARD|MAPK1|PTGS2|SPP1	-5.60121	0	16	0	0	-23.5716	42.7389
GO Biological Processes	GO:0070920	regulation of production of small RNA involved in gene silencing by RNA	19	-6.98963	M1	1	0	19_GO:0048519 negative regulation of biological process	-6.98963	42.7389	14.3159	27994	25	131	5	3.81679	1.67403	1956|2099|5530|7124|7157	EGFR|ESR1|PPP3CA|TNF|TP53	-5.60121	0	99	0	0	-7.51638	61.0556
GO Biological Processes	GO:0010906	regulation of glucose metabolic process	19	-6.97034	M1	1	0	19_GO:0050789 regulation of biological process	-6.97034	14.1286	9.9235	27994	121	131	8	6.10687	2.09214	207|2475|2932|3481|3486|5465|7157|10499	AKT1|MTOR|GSK3B|IGF2|IGFBP3|PPARA|TP53|NCOA2	-5.58259	0	29	0	0	-18.4437	33.7413
GO Biological Processes	GO:0019915	lipid storage	19	-6.96249	M1	1	0	19_GO:0051179 localization	-6.96249	18.4674	10.7948	27994	81	131	7	5.34351	1.96496	857|3553|4792|5465|5467|5468|7124	CAV1|IL1B|NFKBIA|PPARA|PPARD|PPARG|TNF	-5.57619	0	73	0	0	-9.68214	64.1084
GO Biological Processes	GO:0071158	positive regulation of cell cycle arrest	19	-6.96249	M1	1	0	19_GO:0048519 negative regulation of biological process	-6.96249	18.4674	10.7948	27994	81	131	7	5.34351	1.96496	581|891|983|1017|1026|1869|7157	BAX|CCNB1|CDK1|CDK2|CDKN1A|E2F1|TP53	-5.57619	0	50	0	0	-12.7295	29.3306
GO Biological Processes	GO:0097529	myeloid leukocyte migration	19	-6.96193	M1	1	0	19_GO:0040011 locomotion	-6.96193	9.53994	8.79908	27994	224	131	10	7.63359	2.31999	1800|1803|3553|3576|3627|5054|5594|6347|6373|7422	DPEP1|DPP4|IL1B|CXCL8|CXCL10|SERPINE1|MAPK1|CCL2|CXCL11|VEGFA	-5.57619	0	42	0	0	-14.4051	14.5229
GO Biological Processes	GO:0006692	prostanoid metabolic process	19	-6.95489	M1	1	0	19_GO:0008152 metabolic process	-6.95489	26.1667	12.0898	27994	49	131	6	4.58015	1.82652	2944|2950|3553|5321|5742|5743	GSTM1|GSTP1|IL1B|PLA2G4A|PTGS1|PTGS2	-5.57115	0	32	0	0	-17.2246	56.5662
GO Biological Processes	GO:0006693	prostaglandin metabolic process	19	-6.95489	M1	1	0	19_GO:0008152 metabolic process	-6.95489	26.1667	12.0898	27994	49	131	6	4.58015	1.82652	2944|2950|3553|5321|5742|5743	GSTM1|GSTP1|IL1B|PLA2G4A|PTGS1|PTGS2	-5.57115	0	32	0	0	-17.2246	56.5662
GO Biological Processes	GO:0007595	lactation	19	-6.95489	M1	1	0	19_GO:0032502 developmental process	-6.95489	26.1667	12.0898	27994	49	131	6	4.58015	1.82652	595|857|3091|3099|7422|8648	CCND1|CAV1|HIF1A|HK2|VEGFA|NCOA1	-5.57115	0	109	1	1	-6.95489	26.1667
GO Biological Processes	GO:0006875	cellular metal ion homeostasis	19	-6.95388	M1	1	0	19_GO:0065007 biological regulation	-6.95388	5.47	7.49832	27994	586	131	15	11.4504	2.78207	581|596|857|1812|2099|2697|2946|3091|3162|3627|4609|5579|6373|6647|9429	BAX|BCL2|CAV1|DRD1|ESR1|GJA1|GSTM2|HIF1A|HMOX1|CXCL10|MYC|PRKCB|CXCL11|SOD1|ABCG2	-5.5708	0	59	0	0	-11.5248	26.7118
GO Biological Processes	GO:0021782	glial cell development	19	-6.94259	M1	1	0	19_GO:0032502 developmental process	-6.94259	14.0128	9.8767	27994	122	131	8	6.10687	2.09214	207|1812|1956|2950|3458|3553|6647|7124	AKT1|DRD1|EGFR|GSTP1|IFNG|IL1B|SOD1|TNF	-5.56083	0	11	0	0	-26.7386	213.695
GO Biological Processes	GO:0042752	regulation of circadian rhythm	19	-6.94259	M1	1	0	19_GO:0048511 rhythmic process	-6.94259	14.0128	9.8767	27994	122	131	8	6.10687	2.09214	153|983|2475|2932|5465|5468|5599|7157	ADRB1|CDK1|MTOR|GSK3B|PPARA|PPARG|MAPK8|TP53	-5.56083	0	23	0	0	-19.2265	15.684
GO Biological Processes	GO:0006913	nucleocytoplasmic transport	19	-6.94118	M1	1	0	19_GO:0051179 localization	-6.94118	7.24389	8.10651	27994	354	131	12	9.16031	2.52033	207|983|1026|1812|2932|3458|3553|4792|5530|5594|5743|7157	AKT1|CDK1|CDKN1A|DRD1|GSK3B|IFNG|IL1B|NFKBIA|PPP3CA|MAPK1|PTGS2|TP53	-5.56009	0	72	0	0	-9.79486	22.6646
GO Biological Processes	GO:0034644	cellular response to UV	19	-6.92542	M1	1	0	19_GO:0050896 response to stimulus	-6.92542	18.2422	10.7214	27994	82	131	7	5.34351	1.96496	142|581|842|1026|4609|5743|7157	PARP1|BAX|CASP9|CDKN1A|MYC|PTGS2|TP53	-5.54499	0	19	0	0	-20.3862	38.1598
GO Biological Processes	GO:0043900	regulation of multi-organism process	19	-6.91598	M1	1	0	19_GO:0051704 multi-organism process	-6.91598	6.4756	7.8366	27994	429	131	13	9.92366	2.6122	596|857|2697|3458|3553|3559|3576|3725|5578|6590|6772|7124|7422	BCL2|CAV1|GJA1|IFNG|IL1B|IL2RA|CXCL8|JUN|PRKCA|SLPI|STAT1|TNF|VEGFA	-5.53621	0	110	1	1	-6.91598	8.54779
GO Biological Processes	GO:0045471	response to ethanol	19	-6.91508	M1	1	0	19_GO:0050896 response to stimulus	-6.91508	13.8988	9.83045	27994	123	131	8	6.10687	2.09214	595|841|847|983|1728|2950|3383|6647	CCND1|CASP8|CAT|CDK1|NQO1|GSTP1|ICAM1|SOD1	-5.53596	0	2	0	0	-36.5824	19.0276
GO Biological Processes	GO:0051169	nuclear transport	19	-6.90164	M1	1	0	19_GO:0051179 localization	-6.90164	7.18301	8.06186	27994	357	131	12	9.16031	2.52033	207|983|1026|1812|2932|3458|3553|4792|5530|5594|5743|7157	AKT1|CDK1|CDKN1A|DRD1|GSK3B|IFNG|IL1B|NFKBIA|PPP3CA|MAPK1|PTGS2|TP53	-5.52319	0	72	0	0	-9.79486	22.6646
GO Biological Processes	GO:0050806	positive regulation of synaptic transmission	19	-6.90013	M1	1	0	19_GO:0048518 positive regulation of biological process	-6.90013	11.1817	9.1841	27994	172	131	9	6.87023	2.21001	154|760|1812|1956|2932|5594|5743|6347|7124	ADRB2|CA2|DRD1|EGFR|GSK3B|MAPK1|PTGS2|CCL2|TNF	-5.52267	0	74	0	0	-9.55493	26.7118
GO Biological Processes	GO:0019430	removal of superoxide radicals	19	-6.89851	M1	1	0	19_GO:0098754 detoxification	-6.89851	41.0951	14.0247	27994	26	131	5	3.81679	1.67403	1728|4353|4780|6647|7124	NQO1|MPO|NFE2L2|SOD1|TNF	-5.52267	0	41	0	0	-14.6448	41.0951
GO Biological Processes	GO:1900739	regulation of protein insertion into mitochondrial membrane involved in apoptotic signaling pathway	19	-6.89851	M1	1	0	19_GO:0023052 signaling	-6.89851	41.0951	14.0247	27994	26	131	5	3.81679	1.67403	596|841|1869|5599|7157	BCL2|CASP8|E2F1|MAPK8|TP53	-5.52267	0	53	0	0	-12.5473	42.7389
GO Biological Processes	GO:1900740	positive regulation of protein insertion into mitochondrial membrane involved in apoptotic signaling pathway	19	-6.89851	M1	1	0	19_GO:0048518 positive regulation of biological process	-6.89851	41.0951	14.0247	27994	26	131	5	3.81679	1.67403	596|841|1869|5599|7157	BCL2|CASP8|E2F1|MAPK8|TP53	-5.52267	0	53	0	0	-12.5473	42.7389
GO Biological Processes	GO:0001937	negative regulation of endothelial cell proliferation	19	-6.88884	M1	1	0	19_GO:0008283 cell proliferation	-6.88884	18.0224	10.6493	27994	83	131	7	5.34351	1.96496	240|857|2697|5468|6347|6772|7124	ALOX5|CAV1|GJA1|PPARG|CCL2|STAT1|TNF	-5.51458	0	22	0	0	-19.4308	18.0224
GO Biological Processes	GO:0048708	astrocyte differentiation	19	-6.88884	M1	1	0	19_GO:0032502 developmental process	-6.88884	18.0224	10.6493	27994	83	131	7	5.34351	1.96496	1812|1956|3458|3553|3572|5594|7124	DRD1|EGFR|IFNG|IL1B|IL6ST|MAPK1|TNF	-5.51458	0	11	0	0	-26.7386	213.695
GO Biological Processes	GO:0002688	regulation of leukocyte chemotaxis	19	-6.88781	M1	1	0	19_GO:0040011 locomotion	-6.88781	13.7868	9.78473	27994	124	131	8	6.10687	2.09214	1803|2155|3576|3627|5054|5594|6347|7422	DPP4|F7|CXCL8|CXCL10|SERPINE1|MAPK1|CCL2|VEGFA	-5.51458	0	42	0	0	-14.4051	14.5229
GO Biological Processes	GO:0006721	terpenoid metabolic process	19	-6.88781	M1	1	0	19_GO:0008152 metabolic process	-6.88781	13.7868	9.78473	27994	124	131	8	6.10687	2.09214	125|231|1543|1544|1545|1576|1956|5467	ADH1B|AKR1B1|CYP1A1|CYP1A2|CYP1B1|CYP3A4|EGFR|PPARD	-5.51458	0	39	0	0	-14.9141	64.1084
GO Biological Processes	GO:0022612	gland morphogenesis	19	-6.86078	M1	1	0	19_GO:0032502 developmental process	-6.86078	13.6765	9.73954	27994	125	131	8	6.10687	2.09214	367|581|596|857|1956|2099|5241|7124	AR|BAX|BCL2|CAV1|EGFR|ESR1|PGR|TNF	-5.4882	0	31	0	0	-18.0915	106.847
GO Biological Processes	GO:0051099	positive regulation of binding	19	-6.85728	M1	1	0	19_GO:0065007 biological regulation	-6.85728	11.0532	9.12107	27994	174	131	9	6.87023	2.21001	142|857|1950|2932|3458|4318|5444|5468|5925	PARP1|CAV1|EGF|GSK3B|IFNG|MMP9|PON1|PPARG|RB1	-5.48534	0	67	0	0	-10.7795	25.6434
GO Biological Processes	GO:0045913	positive regulation of carbohydrate metabolic process	19	-6.85273	M1	1	0	19_GO:0048518 positive regulation of biological process	-6.85273	17.8079	10.5784	27994	84	131	7	5.34351	1.96496	207|1950|3037|3091|3458|3481|5465	AKT1|EGF|HAS2|HIF1A|IFNG|IGF2|PPARA	-5.48145	0	29	0	0	-18.4437	33.7413
GO Biological Processes	GO:0006984	ER-nucleus signaling pathway	19	-6.84834	M1	1	0	19_GO:0023052 signaling	-6.84834	25.1405	11.8316	27994	51	131	6	4.58015	1.82652	2932|3309|3576|4780|6347|7157	GSK3B|HSPA5|CXCL8|NFE2L2|CCL2|TP53	-5.47835	0	82	0	0	-8.85563	40.7037
GO Biological Processes	GO:0061028	establishment of endothelial barrier	19	-6.84834	M1	1	0	19_GO:0032502 developmental process	-6.84834	25.1405	11.8316	27994	51	131	6	4.58015	1.82652	2194|3383|3551|3553|7124|7422	FASN|ICAM1|IKBKB|IL1B|TNF|VEGFA	-5.47835	0	111	1	1	-6.84834	53.4237
GO Biological Processes	GO:0034605	cellular response to heat	19	-6.83399	M1	1	0	19_GO:0050896 response to stimulus	-6.83399	13.5679	9.69487	27994	126	131	8	6.10687	2.09214	1026|2475|2932|3162|3552|3627|5594|5743	CDKN1A|MTOR|GSK3B|HMOX1|IL1A|CXCL10|MAPK1|PTGS2	-5.46463	0	38	0	0	-14.9727	18.9951
GO Biological Processes	GO:0033197	response to vitamin E	19	-6.83169	M1	1	0	19_GO:0050896 response to stimulus	-6.83169	77.7071	17.4474	27994	11	131	4	3.05344	1.50323	595|847|1277|5468	CCND1|CAT|COL1A1|PPARG	-5.46362	0	78	0	0	-9.1828	77.7071
GO Biological Processes	GO:0046886	positive regulation of hormone biosynthetic process	19	-6.83169	M1	1	0	19_GO:0048518 positive regulation of biological process	-6.83169	77.7071	17.4474	27994	11	131	4	3.05344	1.50323	3091|3458|3553|7124	HIF1A|IFNG|IL1B|TNF	-5.46362	0	11	0	0	-26.7386	213.695
GO Biological Processes	GO:0001649	osteoblast differentiation	19	-6.82012	M1	1	0	19_GO:0032502 developmental process	-6.82012	9.21098	8.61112	27994	232	131	10	7.63359	2.31999	207|847|860|1277|2194|3481|3486|3572|6696|7124	AKT1|CAT|RUNX2|COL1A1|FASN|IGF2|IGFBP3|IL6ST|SPP1|TNF	-5.45269	0	57	0	0	-12.0085	9.31357
GO Biological Processes	GO:0043154	negative regulation of cysteine-type endopeptidase activity involved in apoptotic process	19	-6.81709	M1	1	0	19_GO:0048519 negative regulation of biological process	-6.81709	17.5984	10.5087	27994	85	131	7	5.34351	1.96496	207|1800|4318|5743|5894|7124|7422	AKT1|DPEP1|MMP9|PTGS2|RAF1|TNF|VEGFA	-5.4503	0	18	0	0	-21.0047	17.6445
GO Biological Processes	GO:0071621	granulocyte chemotaxis	19	-6.80743	M1	1	0	19_GO:0040011 locomotion	-6.80743	13.4611	9.6507	27994	127	131	8	6.10687	2.09214	1800|1803|3553|3576|3627|5594|6347|6373	DPEP1|DPP4|IL1B|CXCL8|CXCL10|MAPK1|CCL2|CXCL11	-5.44128	0	42	0	0	-14.4051	14.5229
GO Biological Processes	GO:0002764	immune response-regulating signaling pathway	19	-6.80628	M1	1	0	19_GO:0002376 immune system process	-6.80628	4.95524	7.21324	27994	690	131	16	12.2137	2.8609	581|596|841|857|1147|2099|2353|3551|3725|4792|5530|5579|5594|5599|5894|5970	BAX|BCL2|CASP8|CAV1|CHUK|ESR1|FOS|IKBKB|JUN|NFKBIA|PPP3CA|PRKCB|MAPK1|MAPK8|RAF1|RELA	-5.44077	0	24	0	0	-19.0213	42.7389
GO Biological Processes	GO:0006970	response to osmotic stress	19	-6.7819	M1	1	0	19_GO:0050896 response to stimulus	-6.7819	17.3938	10.4402	27994	86	131	7	5.34351	1.96496	231|581|836|1956|5743|7124|7157	AKR1B1|BAX|CASP3|EGFR|PTGS2|TNF|TP53	-5.41767	0	112	1	1	-6.7819	71.2316
GO Biological Processes	GO:0042446	hormone biosynthetic process	19	-6.7819	M1	1	0	19_GO:0008152 metabolic process	-6.7819	17.3938	10.4402	27994	86	131	7	5.34351	1.96496	231|1576|3091|3458|3553|7124|50506	AKR1B1|CYP3A4|HIF1A|IFNG|IL1B|TNF|DUOX2	-5.41767	0	11	0	0	-26.7386	213.695
GO Biological Processes	GO:0014013	regulation of gliogenesis	19	-6.78109	M1	1	0	19_GO:0032502 developmental process	-6.78109	13.3559	9.60703	27994	128	131	8	6.10687	2.09214	983|1869|2475|3553|3572|5468|5970|7124	CDK1|E2F1|MTOR|IL1B|IL6ST|PPARG|RELA|TNF	-5.41749	0	48	0	0	-13.0283	19.4268
GO Biological Processes	GO:0010469	regulation of signaling receptor activity	19	-6.77317	M1	1	0	19_GO:0023052 signaling	-6.77317	10.8048	8.99803	27994	178	131	9	6.87023	2.21001	152|154|1950|2100|3458|5054|5328|6347|653361	ADRA2C|ADRB2|EGF|ESR2|IFNG|SERPINE1|PLAU|CCL2|NCF1	-5.41084	0	100	0	0	-7.50141	42.7389
GO Biological Processes	GO:0051897	positive regulation of protein kinase B signaling	19	-6.77317	M1	1	0	19_GO:0048518 positive regulation of biological process	-6.77317	10.8048	8.99803	27994	178	131	9	6.87023	2.21001	1950|1956|2064|2099|2152|2155|2475|3481|7124	EGF|EGFR|ERBB2|ESR1|F3|F7|MTOR|IGF2|TNF	-5.41084	0	91	0	0	-8.09326	10.8048
GO Biological Processes	GO:0034763	negative regulation of transmembrane transport	19	-6.75499	M1	1	0	19_GO:0048519 negative regulation of biological process	-6.75499	13.2524	9.56384	27994	129	131	8	6.10687	2.09214	207|857|2475|2946|3553|4318|5579|7124	AKT1|CAV1|MTOR|GSTM2|IL1B|MMP9|PRKCB|TNF	-5.39329	0	86	0	0	-8.68862	13.2524
GO Biological Processes	GO:0061756	leukocyte adhesion to vascular endothelial cell	19	-6.74624	M1	1	0	19_GO:0022610 biological adhesion	-6.74624	24.1918	11.5877	27994	53	131	6	4.58015	1.82652	240|3383|5970|6401|7124|7412	ALOX5|ICAM1|RELA|SELE|TNF|VCAM1	-5.38518	0	106	0	0	-7.18474	46.4554
GO Biological Processes	GO:0032770	positive regulation of monooxygenase activity	19	-6.7274	M1	1	0	19_GO:0048518 positive regulation of biological process	-6.7274	38.1598	13.4891	27994	28	131	5	3.81679	1.67403	207|3091|3458|3553|7124	AKT1|HIF1A|IFNG|IL1B|TNF	-5.36885	0	11	0	0	-26.7386	213.695
GO Biological Processes	GO:0071450	cellular response to oxygen radical	19	-6.7274	M1	1	0	19_GO:0050896 response to stimulus	-6.7274	38.1598	13.4891	27994	28	131	5	3.81679	1.67403	1728|4353|4780|6647|7124	NQO1|MPO|NFE2L2|SOD1|TNF	-5.36885	0	41	0	0	-14.6448	41.0951
GO Biological Processes	GO:0071451	cellular response to superoxide	19	-6.7274	M1	1	0	19_GO:0050896 response to stimulus	-6.7274	38.1598	13.4891	27994	28	131	5	3.81679	1.67403	1728|4353|4780|6647|7124	NQO1|MPO|NFE2L2|SOD1|TNF	-5.36885	0	41	0	0	-14.6448	41.0951
GO Biological Processes	GO:1990776	response to angiotensin	19	-6.7274	M1	1	0	19_GO:0050896 response to stimulus	-6.7274	38.1598	13.4891	27994	28	131	5	3.81679	1.67403	760|857|4780|5743|5970	CA2|CAV1|NFE2L2|PTGS2|RELA	-5.36885	0	96	0	0	-7.78936	40.7037
GO Biological Processes	GO:0050890	cognition	19	-6.71343	M1	1	0	19_GO:0032501 multicellular organismal process	-6.71343	7.78358	8.12703	27994	302	131	11	8.39695	2.42315	836|1812|1956|2353|2475|3091|3725|5594|5743|6532|7124	CASP3|DRD1|EGFR|FOS|MTOR|HIF1A|JUN|MAPK1|PTGS2|SLC6A4|TNF	-5.35551	0	70	0	0	-10.1429	15.2639
GO Biological Processes	GO:0010594	regulation of endothelial cell migration	19	-6.70045	M1	1	0	19_GO:0040011 locomotion	-6.70045	8.9412	8.45397	27994	239	131	10	7.63359	2.31999	207|3091|3162|3315|4780|5468|5578|5743|7124|7422	AKT1|HIF1A|HMOX1|HSPB1|NFE2L2|PPARG|PRKCA|PTGS2|TNF|VEGFA	-5.34315	0	13	0	0	-25.4494	21.3695
GO Biological Processes	GO:0006749	glutathione metabolic process	19	-6.69675	M1	1	0	19_GO:0008152 metabolic process	-6.69675	23.7439	11.4708	27994	54	131	6	4.58015	1.82652	1800|2944|2946|2950|4780|6647	DPEP1|GSTM1|GSTM2|GSTP1|NFE2L2|SOD1	-5.34071	0	105	0	0	-7.24668	94.9754
GO Biological Processes	GO:0010524	positive regulation of calcium ion transport into cytosol	19	-6.69675	M1	1	0	19_GO:0048518 positive regulation of biological process	-6.69675	23.7439	11.4708	27994	54	131	6	4.58015	1.82652	581|857|1812|2946|3627|6373	BAX|CAV1|DRD1|GSTM2|CXCL10|CXCL11	-5.34071	0	59	0	0	-11.5248	26.7118
GO Biological Processes	GO:0032872	regulation of stress-activated MAPK cascade	19	-6.68367	M1	1	0	19_GO:0023052 signaling	-6.68367	8.90394	8.43205	27994	240	131	10	7.63359	2.31999	207|959|1956|2950|3553|4609|5594|7124|7422|653361	AKT1|CD40LG|EGFR|GSTP1|IL1B|MYC|MAPK1|TNF|VEGFA|NCF1	-5.32825	0	35	0	0	-16.3031	20.6801
GO Biological Processes	GO:0007077	mitotic nuclear envelope disassembly	19	-6.65718	M1	1	0	19_GO:0071840 cellular component organization or biogenesis	-6.65718	71.2316	16.6851	27994	12	131	4	3.05344	1.50323	891|983|5578|5579	CCNB1|CDK1|PRKCA|PRKCB	-5.30424	0	63	0	0	-11.069	71.2316
GO Biological Processes	GO:0042178	xenobiotic catabolic process	19	-6.65718	M1	1	0	19_GO:0050896 response to stimulus	-6.65718	71.2316	16.6851	27994	12	131	4	3.05344	1.50323	1244|1543|2944|2946	ABCC2|CYP1A1|GSTM1|GSTM2	-5.30424	0	113	1	1	-6.65718	71.2316
GO Biological Processes	GO:0042368	vitamin D biosynthetic process	19	-6.65718	M1	1	0	19_GO:0008152 metabolic process	-6.65718	71.2316	16.6851	27994	12	131	4	3.05344	1.50323	1576|3458|3553|7124	CYP3A4|IFNG|IL1B|TNF	-5.30424	0	11	0	0	-26.7386	213.695
GO Biological Processes	GO:0045080	positive regulation of chemokine biosynthetic process	19	-6.65718	M1	1	0	19_GO:0048518 positive regulation of biological process	-6.65718	71.2316	16.6851	27994	12	131	4	3.05344	1.50323	3162|3458|3553|7124	HMOX1|IFNG|IL1B|TNF	-5.30424	0	11	0	0	-26.7386	213.695
GO Biological Processes	GO:0010595	positive regulation of endothelial cell migration	19	-6.65273	M1	1	0	19_GO:0040011 locomotion	-6.65273	12.8538	9.39576	27994	133	131	8	6.10687	2.09214	207|3091|3162|3315|4780|5578|5743|7422	AKT1|HIF1A|HMOX1|HSPB1|NFE2L2|PRKCA|PTGS2|VEGFA	-5.30102	0	13	0	0	-25.4494	21.3695
GO Biological Processes	GO:0042770	signal transduction in response to DNA damage	19	-6.65273	M1	1	0	19_GO:0023052 signaling	-6.65273	12.8538	9.39576	27994	133	131	8	6.10687	2.09214	581|842|891|983|1017|1026|1869|7157	BAX|CASP9|CCNB1|CDK1|CDK2|CDKN1A|E2F1|TP53	-5.30102	0	50	0	0	-12.7295	29.3306
GO Biological Processes	GO:0002931	response to ischemia	19	-6.64825	M1	1	0	19_GO:0050896 response to stimulus	-6.64825	23.3121	11.357	27994	55	131	6	4.58015	1.82652	596|842|857|2697|3099|7157	BCL2|CASP9|CAV1|GJA1|HK2|TP53	-5.29716	0	102	0	0	-7.42388	36.8439
GO Biological Processes	GO:0032800	receptor biosynthetic process	19	-6.64684	M1	1	0	19_GO:0008152 metabolic process	-6.64684	36.8439	13.242	27994	29	131	5	3.81679	1.67403	3091|3458|5465|5468|7124	HIF1A|IFNG|PPARA|PPARG|TNF	-5.29684	0	102	0	0	-7.42388	36.8439
GO Biological Processes	GO:0048568	embryonic organ development	19	-6.64547	M1	1	0	19_GO:0032502 developmental process	-6.64547	6.13252	7.55155	27994	453	131	13	9.92366	2.6122	207|841|860|1956|3091|3481|3576|5594|6647|7124|7157|7422|8648	AKT1|CASP8|RUNX2|EGFR|HIF1A|IGF2|CXCL8|MAPK1|SOD1|TNF|TP53|VEGFA|NCOA1	-5.29684	0	27	0	0	-18.6806	17.6945
GO Biological Processes	GO:0001892	embryonic placenta development	19	-6.64547	M1	1	0	19_GO:0022414 reproductive process	-6.64547	16.6207	10.1774	27994	90	131	7	5.34351	1.96496	207|841|1956|3091|3481|5594|8648	AKT1|CASP8|EGFR|HIF1A|IGF2|MAPK1|NCOA1	-5.29684	0	27	0	0	-18.6806	17.6945
GO Biological Processes	GO:0070542	response to fatty acid	19	-6.64547	M1	1	0	19_GO:0050896 response to stimulus	-6.64547	16.6207	10.1774	27994	90	131	7	5.34351	1.96496	207|847|891|1869|5444|5468|5743	AKT1|CAT|CCNB1|E2F1|PON1|PPARG|PTGS2	-5.29684	0	114	1	1	-6.64547	16.6207
GO Biological Processes	GO:0051054	positive regulation of DNA metabolic process	19	-6.63382	M1	1	0	19_GO:0048518 positive regulation of biological process	-6.63382	8.79402	8.36704	27994	243	131	10	7.63359	2.31999	142|207|581|983|1017|1950|1956|3725|4609|5594	PARP1|AKT1|BAX|CDK1|CDK2|EGF|EGFR|JUN|MYC|MAPK1	-5.28642	0	50	0	0	-12.7295	29.3306
GO Biological Processes	GO:0070302	regulation of stress-activated protein kinase signaling cascade	19	-6.63382	M1	1	0	19_GO:0023052 signaling	-6.63382	8.79402	8.36704	27994	243	131	10	7.63359	2.31999	207|959|1956|2950|3553|4609|5594|7124|7422|653361	AKT1|CD40LG|EGFR|GSTP1|IL1B|MYC|MAPK1|TNF|VEGFA|NCF1	-5.28642	0	35	0	0	-16.3031	20.6801
GO Biological Processes	GO:0032368	regulation of lipid transport	19	-6.62769	M1	1	0	19_GO:0051179 localization	-6.62769	12.7579	9.35487	27994	134	131	8	6.10687	2.09214	207|857|1950|3553|4792|5444|5468|6696	AKT1|CAV1|EGF|IL1B|NFKBIA|PON1|PPARG|SPP1	-5.28151	0	75	0	0	-9.34547	32.0542
GO Biological Processes	GO:0034754	cellular hormone metabolic process	19	-6.62769	M1	1	0	19_GO:0008152 metabolic process	-6.62769	12.7579	9.35487	27994	134	131	8	6.10687	2.09214	125|231|1543|1544|1545|1576|2099|6696	ADH1B|AKR1B1|CYP1A1|CYP1A2|CYP1B1|CYP3A4|ESR1|SPP1	-5.28151	0	39	0	0	-14.9141	64.1084
GO Biological Processes	GO:0048639	positive regulation of developmental growth	19	-6.59135	M1	1	0	19_GO:0040007 growth	-6.59135	10.2848	8.73497	27994	187	131	9	6.87023	2.21001	207|596|891|983|2475|3481|5467|5594|7422	AKT1|BCL2|CCNB1|CDK1|MTOR|IGF2|PPARD|MAPK1|VEGFA	-5.24578	0	63	0	0	-11.069	71.2316
GO Biological Processes	GO:0034103	regulation of tissue remodeling	19	-6.5797	M1	1	0	19_GO:0032501 multicellular organismal process	-6.5797	16.2594	10.0522	27994	92	131	7	5.34351	1.96496	581|760|1956|5530|5578|6696|7157	BAX|CA2|EGFR|PPP3CA|PRKCA|SPP1|TP53	-5.23474	0	45	0	0	-13.7627	44.9883
GO Biological Processes	GO:0002366	leukocyte activation involved in immune response	19	-6.5746	M1	1	0	19_GO:0002376 immune system process	-6.5746	4.762	7.00224	27994	718	131	16	12.2137	2.8609	240|847|959|1509|2475|2950|3162|3383|3458|4048|4318|4353|5328|5594|6590|7157	ALOX5|CAT|CD40LG|CTSD|MTOR|GSTP1|HMOX1|ICAM1|IFNG|LTA4H|MMP9|MPO|PLAU|MAPK1|SLPI|TP53	-5.23025	0	80	0	0	-8.9986	5.35576
GO Biological Processes	GO:0000303	response to superoxide	19	-6.56929	M1	1	0	19_GO:0050896 response to stimulus	-6.56929	35.6158	13.0071	27994	30	131	5	3.81679	1.67403	1728|4353|4780|6647|7124	NQO1|MPO|NFE2L2|SOD1|TNF	-5.22676	0	41	0	0	-14.6448	41.0951
GO Biological Processes	GO:0048147	negative regulation of fibroblast proliferation	19	-6.56929	M1	1	0	19_GO:0008283 cell proliferation	-6.56929	35.6158	13.0071	27994	30	131	5	3.81679	1.67403	581|2950|4609|5468|7157	BAX|GSTP1|MYC|PPARG|TP53	-5.22676	0	115	1	1	-6.56929	35.6158
GO Biological Processes	GO:0071480	cellular response to gamma radiation	19	-6.56929	M1	1	0	19_GO:0050896 response to stimulus	-6.56929	35.6158	13.0071	27994	30	131	5	3.81679	1.67403	598|1026|2002|3309|7157	BCL2L1|CDKN1A|ELK1|HSPA5|TP53	-5.22676	0	19	0	0	-20.3862	38.1598
GO Biological Processes	GO:0043280	positive regulation of cysteine-type endopeptidase activity involved in apoptotic process	19	-6.55379	M1	1	0	19_GO:0048518 positive regulation of biological process	-6.55379	12.4785	9.23476	27994	137	131	8	6.10687	2.09214	581|841|842|1509|2152|4609|5468|7124	BAX|CASP8|CASP9|CTSD|F3|MYC|PPARG|TNF	-5.21186	0	52	0	0	-12.6089	14.2463
GO Biological Processes	GO:0001701	in utero embryonic development	19	-6.55012	M1	1	0	19_GO:0032502 developmental process	-6.55012	6.66061	7.66858	27994	385	131	12	9.16031	2.52033	207|367|598|841|891|1956|3091|3481|5594|7157|7422|8648	AKT1|AR|BCL2L1|CASP8|CCNB1|EGFR|HIF1A|IGF2|MAPK1|TP53|VEGFA|NCOA1	-5.2088	0	27	0	0	-18.6806	17.6945
GO Biological Processes	GO:2000117	negative regulation of cysteine-type endopeptidase activity	19	-6.5474	M1	1	0	19_GO:0048519 negative regulation of biological process	-6.5474	16.0845	9.99103	27994	93	131	7	5.34351	1.96496	207|1800|4318|5743|5894|7124|7422	AKT1|DPEP1|MMP9|PTGS2|RAF1|TNF|VEGFA	-5.20668	0	18	0	0	-21.0047	17.6445
GO Biological Processes	GO:0002263	cell activation involved in immune response	19	-6.54241	M1	1	0	19_GO:0002376 immune system process	-6.54241	4.73562	6.97298	27994	722	131	16	12.2137	2.8609	240|847|959|1509|2475|2950|3162|3383|3458|4048|4318|4353|5328|5594|6590|7157	ALOX5|CAT|CD40LG|CTSD|MTOR|GSTP1|HMOX1|ICAM1|IFNG|LTA4H|MMP9|MPO|PLAU|MAPK1|SLPI|TP53	-5.20229	0	80	0	0	-8.9986	5.35576
GO Biological Processes	GO:1901992	positive regulation of mitotic cell cycle phase transition	19	-6.51547	M1	1	0	19_GO:0048518 positive regulation of biological process	-6.51547	15.9134	9.93084	27994	94	131	7	5.34351	1.96496	207|595|891|983|1543|1956|5925	AKT1|CCND1|CCNB1|CDK1|CYP1A1|EGFR|RB1	-5.17595	0	92	0	0	-8.02954	106.847
GO Biological Processes	GO:0046700	heterocycle catabolic process	19	-6.50248	M1	1	0	19_GO:0008152 metabolic process	-6.50248	4.70305	6.93672	27994	727	131	16	12.2137	2.8609	207|581|836|1543|1800|1869|2475|3091|3099|3162|3315|3458|4780|5465|5578|7157	AKT1|BAX|CASP3|CYP1A1|DPEP1|E2F1|MTOR|HIF1A|HK2|HMOX1|HSPB1|IFNG|NFE2L2|PPARA|PRKCA|TP53	-5.16356	0	9	0	0	-26.9935	25.1405
GO Biological Processes	GO:0010623	programmed cell death involved in cell development	19	-6.49905	M1	1	0	19_GO:0032502 developmental process	-6.49905	65.7522	16.0118	27994	13	131	4	3.05344	1.50323	581|596|3552|3553	BAX|BCL2|IL1A|IL1B	-5.16073	0	98	0	0	-7.6909	91.5834
GO Biological Processes	GO:0000305	response to oxygen radical	19	-6.49453	M1	1	0	19_GO:0050896 response to stimulus	-6.49453	34.4669	12.7835	27994	31	131	5	3.81679	1.67403	1728|4353|4780|6647|7124	NQO1|MPO|NFE2L2|SOD1|TNF	-5.15741	0	41	0	0	-14.6448	41.0951
GO Biological Processes	GO:0071549	cellular response to dexamethasone stimulus	19	-6.49453	M1	1	0	19_GO:0050896 response to stimulus	-6.49453	34.4669	12.7835	27994	31	131	5	3.81679	1.67403	842|1244|1956|2908|3383	CASP9|ABCC2|EGFR|NR3C1|ICAM1	-5.15741	0	12	0	0	-25.8818	34.4669
GO Biological Processes	GO:0014706	striated muscle tissue development	19	-6.49046	M1	1	0	19_GO:0032502 developmental process	-6.49046	6.57522	7.60247	27994	390	131	12	9.16031	2.52033	596|857|891|983|2353|2475|2697|5465|5530|5594|5925|7422	BCL2|CAV1|CCNB1|CDK1|FOS|MTOR|GJA1|PPARA|PPP3CA|MAPK1|RB1|VEGFA	-5.15394	0	63	0	0	-11.069	71.2316
GO Biological Processes	GO:0097194	execution phase of apoptosis	19	-6.48391	M1	1	0	19_GO:0009987 cellular process	-6.48391	15.7459	9.87156	27994	95	131	7	5.34351	1.96496	207|581|598|836|841|842|7157	AKT1|BAX|BCL2L1|CASP3|CASP8|CASP9|TP53	-5.14798	0	69	0	0	-10.3446	85.4779
GO Biological Processes	GO:0003158	endothelium development	19	-6.48164	M1	1	0	19_GO:0032502 developmental process	-6.48164	12.2111	9.11834	27994	140	131	8	6.10687	2.09214	2194|2697|3383|3551|3553|3627|7124|7422	FASN|GJA1|ICAM1|IKBKB|IL1B|CXCL10|TNF|VEGFA	-5.1469	0	111	0	0	-6.84834	53.4237
GO Biological Processes	GO:0072655	establishment of protein localization to mitochondrion	19	-6.48164	M1	1	0	19_GO:0051179 localization	-6.48164	12.2111	9.11834	27994	140	131	8	6.10687	2.09214	207|581|596|841|1869|3099|5599|7157	AKT1|BAX|BCL2|CASP8|E2F1|HK2|MAPK8|TP53	-5.1469	0	53	0	0	-12.5473	42.7389
GO Biological Processes	GO:0030217	T cell differentiation	19	-6.47251	M1	1	0	19_GO:0002376 immune system process	-6.47251	8.44643	8.15819	27994	253	131	10	7.63359	2.31999	596|860|2064|2475|3458|3552|3553|3559|6647|7157	BCL2|RUNX2|ERBB2|MTOR|IFNG|IL1A|IL1B|IL2RA|SOD1|TP53	-5.13895	0	98	0	0	-7.6909	91.5834
GO Biological Processes	GO:0051896	regulation of protein kinase B signaling	19	-6.47251	M1	1	0	19_GO:0023052 signaling	-6.47251	8.44643	8.15819	27994	253	131	10	7.63359	2.31999	207|1950|1956|2064|2099|2152|2155|2475|3481|7124	AKT1|EGF|EGFR|ERBB2|ESR1|F3|F7|MTOR|IGF2|TNF	-5.13895	0	91	0	0	-8.09326	10.8048
GO Biological Processes	GO:0046456	icosanoid biosynthetic process	19	-6.46337	M1	1	0	19_GO:0008152 metabolic process	-6.46337	21.7317	10.9303	27994	59	131	6	4.58015	1.82652	240|3553|4048|5321|5742|5743	ALOX5|IL1B|LTA4H|PLA2G4A|PTGS1|PTGS2	-5.131	0	32	0	0	-17.2246	56.5662
GO Biological Processes	GO:0071385	cellular response to glucocorticoid stimulus	19	-6.46337	M1	1	0	19_GO:0050896 response to stimulus	-6.46337	21.7317	10.9303	27994	59	131	6	4.58015	1.82652	842|1244|1956|2908|2950|3383	CASP9|ABCC2|EGFR|NR3C1|GSTP1|ICAM1	-5.131	0	12	0	0	-25.8818	34.4669
GO Biological Processes	GO:0008584	male gonad development	19	-6.45797	M1	1	0	19_GO:0022414 reproductive process	-6.45797	12.1245	9.08032	27994	141	131	8	6.10687	2.09214	367|581|595|596|598|2099|3383|8648	AR|BAX|CCND1|BCL2|BCL2L1|ESR1|ICAM1|NCOA1	-5.12619	0	68	0	0	-10.3658	26.2432
GO Biological Processes	GO:0051188	cofactor biosynthetic process	19	-6.44969	M1	1	0	19_GO:0008152 metabolic process	-6.44969	7.32287	7.81241	27994	321	131	11	8.39695	2.42315	1543|1544|2194|3091|3099|3458|4780|5465|5743|6647|50506	CYP1A1|CYP1A2|FASN|HIF1A|HK2|IFNG|NFE2L2|PPARA|PTGS2|SOD1|DUOX2	-5.1185	0	43	0	0	-14.0637	50.2811
GO Biological Processes	GO:0046546	development of primary male sexual characteristics	19	-6.43448	M1	1	0	19_GO:0022414 reproductive process	-6.43448	12.0391	9.04269	27994	142	131	8	6.10687	2.09214	367|581|595|596|598|2099|3383|8648	AR|BAX|CCND1|BCL2|BCL2L1|ESR1|ICAM1|NCOA1	-5.10388	0	68	0	0	-10.3658	26.2432
GO Biological Processes	GO:0010165	response to X-ray	19	-6.42237	M1	1	0	19_GO:0050896 response to stimulus	-6.42237	33.3898	12.5703	27994	32	131	5	3.81679	1.67403	595|836|1026|7056|7157	CCND1|CASP3|CDKN1A|THBD|TP53	-5.09236	0	116	1	1	-6.42237	33.3898
GO Biological Processes	GO:0043388	positive regulation of DNA binding	19	-6.41927	M1	1	0	19_GO:0065007 biological regulation	-6.41927	21.3695	10.8302	27994	60	131	6	4.58015	1.82652	142|1950|3458|4318|5468|5925	PARP1|EGF|IFNG|MMP9|PPARG|RB1	-5.08985	0	67	0	0	-10.7795	25.6434
GO Biological Processes	GO:0045598	regulation of fat cell differentiation	19	-6.41117	M1	1	0	19_GO:0032502 developmental process	-6.41117	11.9549	9.00543	27994	143	131	8	6.10687	2.09214	207|240|1869|2475|5467|5468|5743|7124	AKT1|ALOX5|E2F1|MTOR|PPARD|PPARG|PTGS2|TNF	-5.08292	0	73	0	0	-9.68214	64.1084
GO Biological Processes	GO:0046425	regulation of JAK-STAT cascade	19	-6.41117	M1	1	0	19_GO:0023052 signaling	-6.41117	11.9549	9.00543	27994	143	131	8	6.10687	2.09214	231|857|1545|1950|3458|3572|7124|7422	AKR1B1|CAV1|CYP1B1|EGF|IFNG|IL6ST|TNF|VEGFA	-5.08292	0	77	0	0	-9.24192	27.7012
GO Biological Processes	GO:0042176	regulation of protein catabolic process	19	-6.40842	M1	1	0	19_GO:0050789 regulation of biological process	-6.40842	6.45928	7.51184	27994	397	131	12	9.16031	2.52033	207|857|1950|1956|2697|2932|3458|3553|4780|4953|5970|7124	AKT1|CAV1|EGF|EGFR|GJA1|GSK3B|IFNG|IL1B|NFE2L2|ODC1|RELA|TNF	-5.08075	0	89	0	0	-8.42736	10.2738
GO Biological Processes	GO:0043009	chordate embryonic development	19	-6.40548	M1	1	0	19_GO:0032502 developmental process	-6.40548	4.95428	6.97768	27994	647	131	15	11.4504	2.78207	207|367|598|836|841|860|891|1277|1956|3091|3481|5594|7157|7422|8648	AKT1|AR|BCL2L1|CASP3|CASP8|RUNX2|CCNB1|COL1A1|EGFR|HIF1A|IGF2|MAPK1|TP53|VEGFA|NCOA1	-5.0784	0	27	0	0	-18.6806	17.6945
GO Biological Processes	GO:0009895	negative regulation of catabolic process	19	-6.39644	M1	1	0	19_GO:0048519 negative regulation of biological process	-6.39644	7.23274	7.74944	27994	325	131	11	8.39695	2.42315	207|596|1869|1956|2475|3162|3553|5465|5970|7124|7157	AKT1|BCL2|E2F1|EGFR|MTOR|HMOX1|IL1B|PPARA|RELA|TNF|TP53	-5.07019	0	9	0	0	-26.9935	25.1405
GO Biological Processes	GO:0007005	mitochondrion organization	19	-6.39611	M1	1	0	19_GO:0071840 cellular component organization or biogenesis	-6.39611	5.34237	7.11742	27994	560	131	14	10.687	2.69929	142|207|581|596|598|841|1869|2932|3091|3099|3725|4318|5599|7157	PARP1|AKT1|BAX|BCL2|BCL2L1|CASP8|E2F1|GSK3B|HIF1A|HK2|JUN|MMP9|MAPK8|TP53	-5.07019	0	53	0	0	-12.5473	42.7389
GO Biological Processes	GO:0006720	isoprenoid metabolic process	19	-6.38804	M1	1	0	19_GO:0008152 metabolic process	-6.38804	11.8719	8.96854	27994	144	131	8	6.10687	2.09214	125|231|1543|1544|1545|1576|1956|5467	ADH1B|AKR1B1|CYP1A1|CYP1A2|CYP1B1|CYP3A4|EGFR|PPARD	-5.06387	0	39	0	0	-14.9141	64.1084
GO Biological Processes	GO:0050921	positive regulation of chemotaxis	19	-6.38804	M1	1	0	19_GO:0040011 locomotion	-6.38804	11.8719	8.96854	27994	144	131	8	6.10687	2.09214	2152|2155|3315|3576|3627|5054|5594|7422	F3|F7|HSPB1|CXCL8|CXCL10|SERPINE1|MAPK1|VEGFA	-5.06387	0	42	0	0	-14.4051	14.5229
GO Biological Processes	GO:0070585	protein localization to mitochondrion	19	-6.38804	M1	1	0	19_GO:0051179 localization	-6.38804	11.8719	8.96854	27994	144	131	8	6.10687	2.09214	207|581|596|841|1869|3099|5599|7157	AKT1|BAX|BCL2|CASP8|E2F1|HK2|MAPK8|TP53	-5.06387	0	53	0	0	-12.5473	42.7389
GO Biological Processes	GO:0010574	regulation of vascular endothelial growth factor production	19	-6.37597	M1	1	0	19_GO:0032501 multicellular organismal process	-6.37597	21.0191	10.7324	27994	61	131	6	4.58015	1.82652	1545|3091|3552|3553|3572|5743	CYP1B1|HIF1A|IL1A|IL1B|IL6ST|PTGS2	-5.05237	0	11	0	0	-26.7386	213.695
GO Biological Processes	GO:0007611	learning or memory	19	-6.36381	M1	1	0	19_GO:0007610 behavior	-6.36381	8.21903	8.01873	27994	260	131	10	7.63359	2.31999	836|1812|1956|2353|2475|3091|3725|5594|5743|6532	CASP3|DRD1|EGFR|FOS|MTOR|HIF1A|JUN|MAPK1|PTGS2|SLC6A4	-5.04079	0	70	0	0	-10.1429	15.2639
GO Biological Processes	GO:0043255	regulation of carbohydrate biosynthetic process	19	-6.3612	M1	1	0	19_GO:0050789 regulation of biological process	-6.3612	15.1097	9.64316	27994	99	131	7	5.34351	1.96496	207|1950|2475|2932|3037|3481|5465	AKT1|EGF|MTOR|GSK3B|HAS2|IGF2|PPARA	-5.03934	0	29	0	0	-18.4437	33.7413
GO Biological Processes	GO:0097327	response to antineoplastic agent	19	-6.3612	M1	1	0	19_GO:0050896 response to stimulus	-6.3612	15.1097	9.64316	27994	99	131	7	5.34351	1.96496	842|1244|1956|2155|2908|3162|3383	CASP9|ABCC2|EGFR|F7|NR3C1|HMOX1|ICAM1	-5.03934	0	12	0	0	-25.8818	34.4669
GO Biological Processes	GO:1903799	negative regulation of production of miRNAs involved in gene silencing by miRNA	19	-6.3545	M1	1	0	19_GO:0048519 negative regulation of biological process	-6.3545	61.0556	15.4113	27994	14	131	4	3.05344	1.50323	2099|5530|7124|7157	ESR1|PPP3CA|TNF|TP53	-5.03322	0	99	0	0	-7.51638	61.0556
GO Biological Processes	GO:0038127	ERBB signaling pathway	19	-6.34231	M1	1	0	19_GO:0023052 signaling	-6.34231	11.7093	8.89584	27994	146	131	8	6.10687	2.09214	207|1950|1956|2064|4318|5578|5594|653361	AKT1|EGF|EGFR|ERBB2|MMP9|PRKCA|MAPK1|NCF1	-5.0216	0	117	1	1	-6.34231	45.7917
GO Biological Processes	GO:0002260	lymphocyte homeostasis	19	-6.33343	M1	1	0	19_GO:0002376 immune system process	-6.33343	20.6801	10.637	27994	62	131	6	4.58015	1.82652	207|581|596|836|3091|3559	AKT1|BAX|BCL2|CASP3|HIF1A|IL2RA	-5.01444	0	95	0	0	-7.88155	37.7108
GO Biological Processes	GO:0071384	cellular response to corticosteroid stimulus	19	-6.33343	M1	1	0	19_GO:0050896 response to stimulus	-6.33343	20.6801	10.637	27994	62	131	6	4.58015	1.82652	842|1244|1956|2908|2950|3383	CASP9|ABCC2|EGFR|NR3C1|GSTP1|ICAM1	-5.01444	0	12	0	0	-25.8818	34.4669
GO Biological Processes	GO:2001244	positive regulation of intrinsic apoptotic signaling pathway	19	-6.33343	M1	1	0	19_GO:0048518 positive regulation of biological process	-6.33343	20.6801	10.637	27994	62	131	6	4.58015	1.82652	581|596|598|857|6647|7157	BAX|BCL2|BCL2L1|CAV1|SOD1|TP53	-5.01444	0	95	0	0	-7.88155	37.7108
GO Biological Processes	GO:1904064	positive regulation of cation transmembrane transport	19	-6.31971	M1	1	0	19_GO:0048518 positive regulation of biological process	-6.31971	11.6296	8.86002	27994	147	131	8	6.10687	2.09214	154|581|1812|2946|3458|3627|6347|6373	ADRB2|BAX|DRD1|GSTM2|IFNG|CXCL10|CCL2|CXCL11	-5.00129	0	59	0	0	-11.5248	26.7118
GO Biological Processes	GO:0060562	epithelial tube morphogenesis	19	-6.31796	M1	1	0	19_GO:0032502 developmental process	-6.31796	7.10164	7.65697	27994	331	131	11	8.39695	2.42315	367|596|836|1950|2099|3091|3627|4609|5241|7124|7422	AR|BCL2|CASP3|EGF|ESR1|HIF1A|CXCL10|MYC|PGR|TNF|VEGFA	-5.00011	0	31	0	0	-18.0915	106.847
GO Biological Processes	GO:0010522	regulation of calcium ion transport into cytosol	19	-6.30185	M1	1	0	19_GO:0051179 localization	-6.30185	14.8105	9.53388	27994	101	131	7	5.34351	1.96496	581|596|857|1812|2946|3627|6373	BAX|BCL2|CAV1|DRD1|GSTM2|CXCL10|CXCL11	-4.98572	0	59	0	0	-11.5248	26.7118
GO Biological Processes	GO:0015908	fatty acid transport	19	-6.30185	M1	1	0	19_GO:0051179 localization	-6.30185	14.8105	9.53388	27994	101	131	7	5.34351	1.96496	207|1244|3553|5321|5465|5467|5468	AKT1|ABCC2|IL1B|PLA2G4A|PPARA|PPARD|PPARG	-4.98572	0	93	0	0	-8.02334	14.8105
GO Biological Processes	GO:0042102	positive regulation of T cell proliferation	19	-6.30185	M1	1	0	19_GO:0022610 biological adhesion	-6.30185	14.8105	9.53388	27994	101	131	7	5.34351	1.96496	959|3481|3552|3553|3559|3572|7412	CD40LG|IGF2|IL1A|IL1B|IL2RA|IL6ST|VCAM1	-4.98572	0	20	0	0	-20.2541	16.3681
GO Biological Processes	GO:0010675	regulation of cellular carbohydrate metabolic process	19	-6.29727	M1	1	0	19_GO:0050789 regulation of biological process	-6.29727	11.5511	8.82454	27994	148	131	8	6.10687	2.09214	207|2475|2932|3481|3486|5465|7157|10499	AKT1|MTOR|GSK3B|IGF2|IGFBP3|PPARA|TP53|NCOA2	-4.98284	0	29	0	0	-18.4437	33.7413
GO Biological Processes	GO:0051592	response to calcium ion	19	-6.29727	M1	1	0	19_GO:0050896 response to stimulus	-6.29727	11.5511	8.82454	27994	148	131	8	6.10687	2.09214	595|857|1800|1956|2353|3309|3725|5530	CCND1|CAV1|DPEP1|EGFR|FOS|HSPA5|JUN|PPP3CA	-4.98284	0	118	1	1	-6.29727	17.4445
GO Biological Processes	GO:0071901	negative regulation of protein serine/threonine kinase activity	19	-6.29727	M1	1	0	19_GO:0048519 negative regulation of biological process	-6.29727	11.5511	8.82454	27994	148	131	8	6.10687	2.09214	207|836|857|1026|2950|3315|3553|5925	AKT1|CASP3|CAV1|CDKN1A|GSTP1|HSPB1|IL1B|RB1	-4.98284	0	56	0	0	-12.0768	11.5511
GO Biological Processes	GO:0043276	anoikis	19	-6.28519	M1	1	0	19_GO:0009987 cellular process	-6.28519	31.4257	12.1719	27994	34	131	5	3.81679	1.67403	207|596|857|1869|2475	AKT1|BCL2|CAV1|E2F1|MTOR	-4.97133	0	119	1	1	-6.28519	31.4257
GO Biological Processes	GO:0043524	negative regulation of neuron apoptotic process	19	-6.275	M1	1	0	19_GO:0048519 negative regulation of biological process	-6.275	11.4735	8.7894	27994	149	131	8	6.10687	2.09214	581|596|598|3091|3162|3725|6347|6647	BAX|BCL2|BCL2L1|HIF1A|HMOX1|JUN|CCL2|SOD1	-4.9617	0	15	0	0	-24.5132	30.8425
GO Biological Processes	GO:0010952	positive regulation of peptidase activity	19	-6.27305	M1	1	0	19_GO:0048518 positive regulation of biological process	-6.27305	9.42771	8.28374	27994	204	131	9	6.87023	2.21001	581|841|842|857|1509|2152|4609|5468|7124	BAX|CASP8|CASP9|CAV1|CTSD|F3|MYC|PPARG|TNF	-4.96032	0	52	0	0	-12.6089	14.2463
GO Biological Processes	GO:0009792	embryo development ending in birth or egg hatching	19	-6.25553	M1	1	0	19_GO:0032502 developmental process	-6.25553	4.82018	6.83643	27994	665	131	15	11.4504	2.78207	207|367|598|836|841|860|891|1277|1956|3091|3481|5594|7157|7422|8648	AKT1|AR|BCL2L1|CASP3|CASP8|RUNX2|CCNB1|COL1A1|EGFR|HIF1A|IGF2|MAPK1|TP53|VEGFA|NCOA1	-4.94337	0	27	0	0	-18.6806	17.6945
GO Biological Processes	GO:0035264	multicellular organism growth	19	-6.25289	M1	1	0	19_GO:0040007 growth	-6.25289	11.397	8.7546	27994	150	131	8	6.10687	2.09214	153|154|367|596|2475|3481|6647|7157	ADRB1|ADRB2|AR|BCL2|MTOR|IGF2|SOD1|TP53	-4.94129	0	120	1	1	-6.25289	17.4445
GO Biological Processes	GO:0002066	columnar/cuboidal epithelial cell development	19	-6.25053	M1	1	0	19_GO:0032502 developmental process	-6.25053	20.0339	10.4527	27994	64	131	6	4.58015	1.82652	1026|2194|2932|3091|3572|6647	CDKN1A|FASN|GSK3B|HIF1A|IL6ST|SOD1	-4.93949	0	51	0	0	-12.6756	53.4237
GO Biological Processes	GO:0030593	neutrophil chemotaxis	19	-6.24377	M1	1	0	19_GO:0040011 locomotion	-6.24377	14.5229	9.42766	27994	103	131	7	5.34351	1.96496	1800|1803|3553|3576|3627|6347|6373	DPEP1|DPP4|IL1B|CXCL8|CXCL10|CCL2|CXCL11	-4.93386	0	42	0	0	-14.4051	14.5229
GO Biological Processes	GO:1901570	fatty acid derivative biosynthetic process	19	-6.24377	M1	1	0	19_GO:0008152 metabolic process	-6.24377	14.5229	9.42766	27994	103	131	7	5.34351	1.96496	240|2194|3553|4048|5321|5742|5743	ALOX5|FASN|IL1B|LTA4H|PLA2G4A|PTGS1|PTGS2	-4.93386	0	32	0	0	-17.2246	56.5662
GO Biological Processes	GO:0002683	negative regulation of immune system process	19	-6.23994	M1	1	0	19_GO:0002376 immune system process	-6.23994	5.6464	7.12958	27994	492	131	13	9.92366	2.6122	207|836|1281|1803|2064|3162|3559|4609|4780|4792|5468|6347|7124	AKT1|CASP3|COL3A1|DPP4|ERBB2|HMOX1|IL2RA|MYC|NFE2L2|NFKBIA|PPARG|CCL2|TNF	-4.9308	0	121	1	1	-6.23994	6.71996
GO Biological Processes	GO:0007420	brain development	19	-6.2396	M1	1	0	19_GO:0032502 developmental process	-6.2396	4.49292	6.69854	27994	761	131	16	12.2137	2.8609	581|596|836|1281|1812|1869|1950|1956|2475|2932|3091|3309|5530|6532|7157|8648	BAX|BCL2|CASP3|COL3A1|DRD1|E2F1|EGF|EGFR|MTOR|GSK3B|HIF1A|HSPA5|PPP3CA|SLC6A4|TP53|NCOA1	-4.9308	0	122	1	1	-6.2396	10.5964
GO Biological Processes	GO:0000077	DNA damage checkpoint	19	-6.23094	M1	1	0	19_GO:0048519 negative regulation of biological process	-6.23094	11.3216	8.72012	27994	151	131	8	6.10687	2.09214	581|595|891|983|1017|1026|1869|7157	BAX|CCND1|CCNB1|CDK1|CDK2|CDKN1A|E2F1|TP53	-4.92382	0	50	0	0	-12.7295	29.3306
GO Biological Processes	GO:0008643	carbohydrate transport	19	-6.23094	M1	1	0	19_GO:0051179 localization	-6.23094	11.3216	8.72012	27994	151	131	8	6.10687	2.09214	207|1812|3099|3553|4780|5467|5579|7124	AKT1|DRD1|HK2|IL1B|NFE2L2|PPARD|PRKCB|TNF	-4.92382	0	104	0	0	-7.26254	29.1402
GO Biological Processes	GO:0097530	granulocyte migration	19	-6.23094	M1	1	0	19_GO:0040011 locomotion	-6.23094	11.3216	8.72012	27994	151	131	8	6.10687	2.09214	1800|1803|3553|3576|3627|5594|6347|6373	DPEP1|DPP4|IL1B|CXCL8|CXCL10|MAPK1|CCL2|CXCL11	-4.92382	0	42	0	0	-14.4051	14.5229
GO Biological Processes	GO:0042362	fat-soluble vitamin biosynthetic process	19	-6.22138	M1	1	0	19_GO:0008152 metabolic process	-6.22138	56.9852	14.8713	27994	15	131	4	3.05344	1.50323	1576|3458|3553|7124	CYP3A4|IFNG|IL1B|TNF	-4.91593	0	11	0	0	-26.7386	213.695
GO Biological Processes	GO:0045073	regulation of chemokine biosynthetic process	19	-6.22138	M1	1	0	19_GO:0032501 multicellular organismal process	-6.22138	56.9852	14.8713	27994	15	131	4	3.05344	1.50323	3162|3458|3553|7124	HMOX1|IFNG|IL1B|TNF	-4.91593	0	11	0	0	-26.7386	213.695
GO Biological Processes	GO:0090594	inflammatory response to wounding	19	-6.22138	M1	1	0	19_GO:0050896 response to stimulus	-6.22138	56.9852	14.8713	27994	15	131	4	3.05344	1.50323	240|3091|3162|3552	ALOX5|HIF1A|HMOX1|IL1A	-4.91593	0	123	1	1	-6.22138	80.1355
GO Biological Processes	GO:1904031	positive regulation of cyclin-dependent protein kinase activity	19	-6.21987	M1	1	0	19_GO:0048518 positive regulation of biological process	-6.21987	30.5278	11.9854	27994	35	131	5	3.81679	1.67403	207|595|891|1026|1956	AKT1|CCND1|CCNB1|CDKN1A|EGFR	-4.91498	0	92	0	0	-8.02954	106.847
GO Biological Processes	GO:0006940	regulation of smooth muscle contraction	19	-6.21013	M1	1	0	19_GO:0032501 multicellular organismal process	-6.21013	19.7257	10.3636	27994	65	131	6	4.58015	1.82652	152|154|857|1129|5743|6647	ADRA2C|ADRB2|CAV1|CHRM2|PTGS2|SOD1	-4.90634	0	36	0	0	-16.0134	50.2811
GO Biological Processes	GO:2000351	regulation of endothelial cell apoptotic process	19	-6.21013	M1	1	0	19_GO:0050789 regulation of biological process	-6.21013	19.7257	10.3636	27994	65	131	6	4.58015	1.82652	959|3383|4780|5054|6347|7124	CD40LG|ICAM1|NFE2L2|SERPINE1|CCL2|TNF	-4.90634	0	66	0	0	-10.9361	21.3695
GO Biological Processes	GO:1904892	regulation of STAT cascade	19	-6.20916	M1	1	0	19_GO:0023052 signaling	-6.20916	11.2471	8.68597	27994	152	131	8	6.10687	2.09214	231|857|1545|1950|3458|3572|7124|7422	AKR1B1|CAV1|CYP1B1|EGF|IFNG|IL6ST|TNF|VEGFA	-4.90592	0	77	0	0	-9.24192	27.7012
GO Biological Processes	GO:2000378	negative regulation of reactive oxygen species metabolic process	19	-6.1704	M1	1	0	19_GO:0048519 negative regulation of biological process	-6.1704	19.4268	10.2766	27994	66	131	6	4.58015	1.82652	596|857|3091|3099|4314|7157	BCL2|CAV1|HIF1A|HK2|MMP3|TP53	-4.86772	0	102	0	0	-7.42388	36.8439
GO Biological Processes	GO:0014065	phosphatidylinositol 3-kinase signaling	19	-6.16606	M1	1	0	19_GO:0023052 signaling	-6.16606	11.101	8.61861	27994	154	131	8	6.10687	2.09214	207|847|1956|2064|5467|5594|7124|653361	AKT1|CAT|EGFR|ERBB2|PPARD|MAPK1|TNF|NCF1	-4.86531	0	124	1	1	-6.16606	11.101
GO Biological Processes	GO:2001056	positive regulation of cysteine-type endopeptidase activity	19	-6.16606	M1	1	0	19_GO:0048518 positive regulation of biological process	-6.16606	11.101	8.61861	27994	154	131	8	6.10687	2.09214	581|841|842|1509|2152|4609|5468|7124	BAX|CASP8|CASP9|CTSD|F3|MYC|PPARG|TNF	-4.86531	0	52	0	0	-12.6089	14.2463
GO Biological Processes	GO:0010721	negative regulation of cell development	19	-6.16579	M1	1	0	19_GO:0048519 negative regulation of biological process	-6.16579	6.85318	7.47877	27994	343	131	11	8.39695	2.42315	596|1281|2932|3553|5465|5530|6532|6696|7124|7157|7422	BCL2|COL3A1|GSK3B|IL1B|PPARA|PPP3CA|SLC6A4|SPP1|TNF|TP53|VEGFA	-4.86531	0	37	0	0	-15.5965	53.4237
GO Biological Processes	GO:0016042	lipid catabolic process	19	-6.16579	M1	1	0	19_GO:0008152 metabolic process	-6.16579	6.85318	7.47877	27994	343	131	11	8.39695	2.42315	207|1544|1545|1576|2475|3553|5321|5465|5467|6696|7124	AKT1|CYP1A2|CYP1B1|CYP3A4|MTOR|IL1B|PLA2G4A|PPARA|PPARD|SPP1|TNF	-4.86531	0	73	0	0	-9.68214	64.1084
GO Biological Processes	GO:0042554	superoxide anion generation	19	-6.15656	M1	1	0	19_GO:0008152 metabolic process	-6.15656	29.6798	11.8065	27994	36	131	5	3.81679	1.67403	1956|2950|6647|50506|653361	EGFR|GSTP1|SOD1|DUOX2|NCF1	-4.85663	0	108	0	0	-7.06629	33.7413
GO Biological Processes	GO:0002262	myeloid cell homeostasis	19	-6.14474	M1	1	0	19_GO:0002376 immune system process	-6.14474	11.0294	8.5854	27994	155	131	8	6.10687	2.09214	581|836|3091|3162|5925|6647|6772|7422	BAX|CASP3|HIF1A|HMOX1|RB1|SOD1|STAT1|VEGFA	-4.8459	0	103	0	0	-7.42142	11.0294
GO Biological Processes	GO:0048754	branching morphogenesis of an epithelial tube	19	-6.14474	M1	1	0	19_GO:0032502 developmental process	-6.14474	11.0294	8.5854	27994	155	131	8	6.10687	2.09214	367|596|1950|2099|4609|5241|7124|7422	AR|BCL2|EGF|ESR1|MYC|PGR|TNF|VEGFA	-4.8459	0	31	0	0	-18.0915	106.847
GO Biological Processes	GO:0030330	DNA damage response, signal transduction by p53 class mediator	19	-6.13122	M1	1	0	19_GO:0023052 signaling	-6.13122	13.98	9.22386	27994	107	131	7	5.34351	1.96496	581|891|983|1017|1026|1869|7157	BAX|CCNB1|CDK1|CDK2|CDKN1A|E2F1|TP53	-4.83293	0	50	0	0	-12.7295	29.3306
GO Biological Processes	GO:0001523	retinoid metabolic process	19	-6.1038	M1	1	0	19_GO:0008152 metabolic process	-6.1038	13.8506	9.17462	27994	108	131	7	5.34351	1.96496	125|231|1543|1544|1545|1576|5467	ADH1B|AKR1B1|CYP1A1|CYP1A2|CYP1B1|CYP3A4|PPARD	-4.8066	0	39	0	0	-14.9141	64.1084
GO Biological Processes	GO:0071887	leukocyte apoptotic process	19	-6.1038	M1	1	0	19_GO:0009987 cellular process	-6.1038	13.8506	9.17462	27994	108	131	7	5.34351	1.96496	207|581|836|842|3091|3559|7157	AKT1|BAX|CASP3|CASP9|HIF1A|IL2RA|TP53	-4.8066	0	95	0	0	-7.88155	37.7108
GO Biological Processes	GO:0002070	epithelial cell maturation	19	-6.09802	M1	1	0	19_GO:0032502 developmental process	-6.09802	53.4237	14.3822	27994	16	131	4	3.05344	1.50323	231|1026|3091|5241	AKR1B1|CDKN1A|HIF1A|PGR	-4.80516	0	51	0	0	-12.6756	53.4237
GO Biological Processes	GO:0030397	membrane disassembly	19	-6.09802	M1	1	0	19_GO:0071840 cellular component organization or biogenesis	-6.09802	53.4237	14.3822	27994	16	131	4	3.05344	1.50323	891|983|5578|5579	CCNB1|CDK1|PRKCA|PRKCB	-4.80516	0	63	0	0	-11.069	71.2316
GO Biological Processes	GO:0032352	positive regulation of hormone metabolic process	19	-6.09802	M1	1	0	19_GO:0048518 positive regulation of biological process	-6.09802	53.4237	14.3822	27994	16	131	4	3.05344	1.50323	3091|3458|3553|7124	HIF1A|IFNG|IL1B|TNF	-4.80516	0	11	0	0	-26.7386	213.695
GO Biological Processes	GO:0042033	chemokine biosynthetic process	19	-6.09802	M1	1	0	19_GO:0032501 multicellular organismal process	-6.09802	53.4237	14.3822	27994	16	131	4	3.05344	1.50323	3162|3458|3553|7124	HMOX1|IFNG|IL1B|TNF	-4.80516	0	11	0	0	-26.7386	213.695
GO Biological Processes	GO:0050755	chemokine metabolic process	19	-6.09802	M1	1	0	19_GO:0008152 metabolic process	-6.09802	53.4237	14.3822	27994	16	131	4	3.05344	1.50323	3162|3458|3553|7124	HMOX1|IFNG|IL1B|TNF	-4.80516	0	11	0	0	-26.7386	213.695
GO Biological Processes	GO:0051081	nuclear envelope disassembly	19	-6.09802	M1	1	0	19_GO:0071840 cellular component organization or biogenesis	-6.09802	53.4237	14.3822	27994	16	131	4	3.05344	1.50323	891|983|5578|5579	CCNB1|CDK1|PRKCA|PRKCB	-4.80516	0	63	0	0	-11.069	71.2316
GO Biological Processes	GO:1901550	regulation of endothelial cell development	19	-6.09802	M1	1	0	19_GO:0032502 developmental process	-6.09802	53.4237	14.3822	27994	16	131	4	3.05344	1.50323	3551|3553|7124|7422	IKBKB|IL1B|TNF|VEGFA	-4.80516	0	111	0	0	-6.84834	53.4237
GO Biological Processes	GO:1903140	regulation of establishment of endothelial barrier	19	-6.09802	M1	1	0	19_GO:0032502 developmental process	-6.09802	53.4237	14.3822	27994	16	131	4	3.05344	1.50323	3551|3553|7124|7422	IKBKB|IL1B|TNF|VEGFA	-4.80516	0	111	0	0	-6.84834	53.4237
GO Biological Processes	GO:0042108	positive regulation of cytokine biosynthetic process	19	-6.09514	M1	1	0	19_GO:0048518 positive regulation of biological process	-6.09514	28.8777	11.6348	27994	37	131	5	3.81679	1.67403	3162|3315|3458|3553|7124	HMOX1|HSPB1|IFNG|IL1B|TNF	-4.80389	0	11	0	0	-26.7386	213.695
GO Biological Processes	GO:0090322	regulation of superoxide metabolic process	19	-6.09514	M1	1	0	19_GO:0050789 regulation of biological process	-6.09514	28.8777	11.6348	27994	37	131	5	3.81679	1.67403	1956|2950|4780|6647|7124	EGFR|GSTP1|NFE2L2|SOD1|TNF	-4.80389	0	108	0	0	-7.06629	33.7413
GO Biological Processes	GO:1904994	regulation of leukocyte adhesion to vascular endothelial cell	19	-6.09514	M1	1	0	19_GO:0022610 biological adhesion	-6.09514	28.8777	11.6348	27994	37	131	5	3.81679	1.67403	240|3383|5970|6401|7124	ALOX5|ICAM1|RELA|SELE|TNF	-4.80389	0	106	0	0	-7.18474	46.4554
GO Biological Processes	GO:0050766	positive regulation of phagocytosis	19	-6.09286	M1	1	0	19_GO:0048518 positive regulation of biological process	-6.09286	18.8554	10.108	27994	68	131	6	4.58015	1.82652	3458|3553|5468|6347|6647|7124	IFNG|IL1B|PPARG|CCL2|SOD1|TNF	-4.80215	0	11	0	0	-26.7386	213.695
GO Biological Processes	GO:0043271	negative regulation of ion transport	19	-6.08168	M1	1	0	19_GO:0048519 negative regulation of biological process	-6.08168	10.82	8.48755	27994	158	131	8	6.10687	2.09214	207|596|857|2475|2946|3383|4318|5743	AKT1|BCL2|CAV1|MTOR|GSTM2|ICAM1|MMP9|PTGS2	-4.79204	0	86	0	0	-8.68862	13.2524
GO Biological Processes	GO:0050729	positive regulation of inflammatory response	19	-6.08168	M1	1	0	19_GO:0048518 positive regulation of biological process	-6.08168	10.82	8.48755	27994	158	131	8	6.10687	2.09214	1956|3458|3553|3572|4792|5054|5743|7124	EGFR|IFNG|IL1B|IL6ST|NFKBIA|SERPINE1|PTGS2|TNF	-4.79204	0	54	0	0	-12.3313	10.82
GO Biological Processes	GO:0006939	smooth muscle contraction	19	-6.07665	M1	1	0	19_GO:0032501 multicellular organismal process	-6.07665	13.7235	9.12602	27994	109	131	7	5.34351	1.96496	152|154|857|1129|1812|5743|6647	ADRA2C|ADRB2|CAV1|CHRM2|DRD1|PTGS2|SOD1	-4.78809	0	36	0	0	-16.0134	50.2811
GO Biological Processes	GO:0043618	regulation of transcription from RNA polymerase II promoter in response to stress	19	-6.07665	M1	1	0	19_GO:0050896 response to stimulus	-6.07665	13.7235	9.12602	27994	109	131	7	5.34351	1.96496	3091|3162|3309|3725|4780|7157|7422	HIF1A|HMOX1|HSPA5|JUN|NFE2L2|TP53|VEGFA	-4.78809	0	79	0	0	-9.05318	142.463
GO Biological Processes	GO:0090316	positive regulation of intracellular protein transport	19	-6.06096	M1	1	0	19_GO:0048518 positive regulation of biological process	-6.06096	10.7519	8.45551	27994	159	131	8	6.10687	2.09214	983|2064|2932|3458|3553|5594|5743|7157	CDK1|ERBB2|GSK3B|IFNG|IL1B|MAPK1|PTGS2|TP53	-4.77292	0	72	0	0	-9.79486	22.6646
GO Biological Processes	GO:0001885	endothelial cell development	19	-6.05501	M1	1	0	19_GO:0032502 developmental process	-6.05501	18.5821	10.0264	27994	69	131	6	4.58015	1.82652	2194|3383|3551|3553|7124|7422	FASN|ICAM1|IKBKB|IL1B|TNF|VEGFA	-4.76751	0	111	0	0	-6.84834	53.4237
GO Biological Processes	GO:1901989	positive regulation of cell cycle phase transition	19	-6.04978	M1	1	0	19_GO:0048518 positive regulation of biological process	-6.04978	13.5988	9.07805	27994	110	131	7	5.34351	1.96496	207|595|891|983|1543|1956|5925	AKT1|CCND1|CCNB1|CDK1|CYP1A1|EGFR|RB1	-4.76281	0	92	0	0	-8.02954	106.847
GO Biological Processes	GO:0046942	carboxylic acid transport	19	-6.04361	M1	1	0	19_GO:0051179 localization	-6.04361	6.65904	7.33668	27994	353	131	11	8.39695	2.42315	207|1244|2697|3553|5321|5465|5467|5468|8648|9429|10499	AKT1|ABCC2|GJA1|IL1B|PLA2G4A|PPARA|PPARD|PPARG|NCOA1|ABCG2|NCOA2	-4.75718	0	93	0	0	-8.02334	14.8105
GO Biological Processes	GO:0014912	negative regulation of smooth muscle cell migration	19	-6.0355	M1	1	0	19_GO:0040011 locomotion	-6.0355	28.1177	11.4697	27994	38	131	5	3.81679	1.67403	2950|3486|4780|5054|5467	GSTP1|IGFBP3|NFE2L2|SERPINE1|PPARD	-4.75224	0	64	0	0	-11.0201	28.1177
GO Biological Processes	GO:0030224	monocyte differentiation	19	-6.0355	M1	1	0	19_GO:0002376 immune system process	-6.0355	28.1177	11.4697	27994	38	131	5	3.81679	1.67403	2194|3725|4609|5468|7422	FASN|JUN|MYC|PPARG|VEGFA	-4.75224	0	76	0	0	-9.25182	28.1177
GO Biological Processes	GO:0032094	response to food	19	-6.0355	M1	1	0	19_GO:0050896 response to stimulus	-6.0355	28.1177	11.4697	27994	38	131	5	3.81679	1.67403	207|1543|2475|4353|5465	AKT1|CYP1A1|MTOR|MPO|PPARA	-4.75224	0	73	0	0	-9.68214	64.1084
GO Biological Processes	GO:0043029	T cell homeostasis	19	-6.0355	M1	1	0	19_GO:0002376 immune system process	-6.0355	28.1177	11.4697	27994	38	131	5	3.81679	1.67403	207|581|596|836|3559	AKT1|BAX|BCL2|CASP3|IL2RA	-4.75224	0	95	0	0	-7.88155	37.7108
GO Biological Processes	GO:0045923	positive regulation of fatty acid metabolic process	19	-6.0355	M1	1	0	19_GO:0048518 positive regulation of biological process	-6.0355	28.1177	11.4697	27994	38	131	5	3.81679	1.67403	3553|5465|5467|5468|5743	IL1B|PPARA|PPARD|PPARG|PTGS2	-4.75224	0	73	0	0	-9.68214	64.1084
GO Biological Processes	GO:1903131	mononuclear cell differentiation	19	-6.0355	M1	1	0	19_GO:0002376 immune system process	-6.0355	28.1177	11.4697	27994	38	131	5	3.81679	1.67403	2194|3725|4609|5468|7422	FASN|JUN|MYC|PPARG|VEGFA	-4.75224	0	76	0	0	-9.25182	28.1177
GO Biological Processes	GO:0015849	organic acid transport	19	-6.03162	M1	1	0	19_GO:0051179 localization	-6.03162	6.64023	7.32278	27994	354	131	11	8.39695	2.42315	207|1244|2697|3553|5321|5465|5467|5468|8648|9429|10499	AKT1|ABCC2|GJA1|IL1B|PLA2G4A|PPARA|PPARD|PPARG|NCOA1|ABCG2|NCOA2	-4.74889	0	93	0	0	-8.02334	14.8105
GO Biological Processes	GO:0031570	DNA integrity checkpoint	19	-6.01993	M1	1	0	19_GO:0048519 negative regulation of biological process	-6.01993	10.6184	8.3923	27994	161	131	8	6.10687	2.09214	581|595|891|983|1017|1026|1869|7157	BAX|CCND1|CCNB1|CDK1|CDK2|CDKN1A|E2F1|TP53	-4.73826	0	50	0	0	-12.7295	29.3306
GO Biological Processes	GO:0034767	positive regulation of ion transmembrane transport	19	-6.01993	M1	1	0	19_GO:0048518 positive regulation of biological process	-6.01993	10.6184	8.3923	27994	161	131	8	6.10687	2.09214	154|581|1812|2946|3458|3627|6347|6373	ADRB2|BAX|DRD1|GSTM2|IFNG|CXCL10|CCL2|CXCL11	-4.73826	0	59	0	0	-11.5248	26.7118
GO Biological Processes	GO:0072577	endothelial cell apoptotic process	19	-6.01775	M1	1	0	19_GO:0009987 cellular process	-6.01775	18.3167	9.94653	27994	70	131	6	4.58015	1.82652	959|3383|4780|5054|6347|7124	CD40LG|ICAM1|NFE2L2|SERPINE1|CCL2|TNF	-4.7366	0	66	0	0	-10.9361	21.3695
GO Biological Processes	GO:0051301	cell division	19	-6.01476	M1	1	0	19_GO:0009987 cellular process	-6.01476	4.9614	6.74295	27994	603	131	14	10.687	2.69929	595|598|847|891|983|1017|2908|3481|3552|3553|4609|5925|7150|7422	CCND1|BCL2L1|CAT|CCNB1|CDK1|CDK2|NR3C1|IGF2|IL1A|IL1B|MYC|RB1|TOP1|VEGFA	-4.73413	0	98	0	0	-7.6909	91.5834
GO Biological Processes	GO:0046136	positive regulation of vitamin metabolic process	19	-6.00233	M1	1	0	19_GO:0048518 positive regulation of biological process	-6.00233	128.217	19.5066	27994	5	131	3	2.29008	1.30695	3458|3553|7124	IFNG|IL1B|TNF	-4.72275	0	11	0	0	-26.7386	213.695
GO Biological Processes	GO:0080184	response to phenylpropanoid	19	-6.00233	M1	1	0	19_GO:0050896 response to stimulus	-6.00233	128.217	19.5066	27994	5	131	3	2.29008	1.30695	847|1956|2155	CAT|EGFR|F7	-4.72275	0	125	1	1	-6.00233	128.217
GO Biological Processes	GO:0046822	regulation of nucleocytoplasmic transport	19	-5.99682	M1	1	0	19_GO:0051179 localization	-5.99682	13.3559	8.98397	27994	112	131	7	5.34351	1.96496	983|2932|3458|3553|5594|5743|7157	CDK1|GSK3B|IFNG|IL1B|MAPK1|PTGS2|TP53	-4.71777	0	72	0	0	-9.79486	22.6646
GO Biological Processes	GO:0030730	sequestering of triglyceride	19	-5.98309	M1	1	0	19_GO:0051179 localization	-5.98309	50.2811	13.9364	27994	17	131	4	3.05344	1.50323	3553|5465|5468|7124	IL1B|PPARA|PPARG|TNF	-4.7056	0	73	0	0	-9.68214	64.1084
GO Biological Processes	GO:0045986	negative regulation of smooth muscle contraction	19	-5.98309	M1	1	0	19_GO:0048519 negative regulation of biological process	-5.98309	50.2811	13.9364	27994	17	131	4	3.05344	1.50323	152|154|5743|6647	ADRA2C|ADRB2|PTGS2|SOD1	-4.7056	0	36	0	0	-16.0134	50.2811
GO Biological Processes	GO:0050665	hydrogen peroxide biosynthetic process	19	-5.98309	M1	1	0	19_GO:0008152 metabolic process	-5.98309	50.2811	13.9364	27994	17	131	4	3.05344	1.50323	1543|1544|6647|50506	CYP1A1|CYP1A2|SOD1|DUOX2	-4.7056	0	43	0	0	-14.0637	50.2811
GO Biological Processes	GO:0006936	muscle contraction	19	-5.97221	M1	1	0	19_GO:0032501 multicellular organismal process	-5.97221	6.54775	7.25405	27994	359	131	11	8.39695	2.42315	152|154|857|1129|1147|1812|2475|2697|2946|5743|6647	ADRA2C|ADRB2|CAV1|CHRM2|CHUK|DRD1|MTOR|GJA1|GSTM2|PTGS2|SOD1	-4.69576	0	36	0	0	-16.0134	50.2811
GO Biological Processes	GO:0010948	negative regulation of cell cycle process	19	-5.97221	M1	1	0	19_GO:0048519 negative regulation of biological process	-5.97221	6.54775	7.25405	27994	359	131	11	8.39695	2.42315	581|595|596|891|983|1017|1026|1869|5925|6347|7157	BAX|CCND1|BCL2|CCNB1|CDK1|CDK2|CDKN1A|E2F1|RB1|CCL2|TP53	-4.69576	0	50	0	0	-12.7295	29.3306
GO Biological Processes	GO:0005976	polysaccharide metabolic process	19	-5.97073	M1	1	0	19_GO:0008152 metabolic process	-5.97073	13.2377	8.93783	27994	113	131	7	5.34351	1.96496	207|1950|2475|2932|3037|3481|3572	AKT1|EGF|MTOR|GSK3B|HAS2|IGF2|IL6ST	-4.6948	0	29	0	0	-18.4437	33.7413
GO Biological Processes	GO:0019722	calcium-mediated signaling	19	-5.96683	M1	1	0	19_GO:0023052 signaling	-5.96683	8.6633	7.86023	27994	222	131	9	6.87023	2.21001	1956|2475|2932|2946|3576|5530|6401|7124|7412	EGFR|MTOR|GSK3B|GSTM2|CXCL8|PPP3CA|SELE|TNF|VCAM1	-4.69141	0	60	0	0	-11.2909	19.4268
GO Biological Processes	GO:0046661	male sex differentiation	19	-5.95945	M1	1	0	19_GO:0022414 reproductive process	-5.95945	10.4241	8.29952	27994	164	131	8	6.10687	2.09214	367|581|595|596|598|2099|3383|8648	AR|BAX|CCND1|BCL2|BCL2L1|ESR1|ICAM1|NCOA1	-4.68455	0	68	0	0	-10.3658	26.2432
GO Biological Processes	GO:0002526	acute inflammatory response	19	-5.93453	M1	1	0	19_GO:0050896 response to stimulus	-5.93453	8.58595	7.81614	27994	224	131	9	6.87023	2.21001	2152|2950|3383|3552|3553|3572|5468|5743|7124	F3|GSTP1|ICAM1|IL1A|IL1B|IL6ST|PPARG|PTGS2|TNF	-4.66015	0	11	0	0	-26.7386	213.695
GO Biological Processes	GO:0060485	mesenchyme development	19	-5.93287	M1	1	0	19_GO:0032502 developmental process	-5.93287	7.36878	7.47533	27994	290	131	10	7.63359	2.31999	596|1277|2475|2932|3037|3091|3553|4609|5594|6772	BCL2|COL1A1|MTOR|GSK3B|HAS2|HIF1A|IL1B|MYC|MAPK1|STAT1	-4.65901	0	126	1	1	-5.93287	53.4237
GO Biological Processes	GO:0010613	positive regulation of cardiac muscle hypertrophy	19	-5.92118	M1	1	0	19_GO:0048518 positive regulation of biological process	-5.92118	26.7118	11.158	27994	40	131	5	3.81679	1.67403	142|2475|3572|5530|5578	PARP1|MTOR|IL6ST|PPP3CA|PRKCA	-4.64886	0	61	0	0	-11.228	26.7118
GO Biological Processes	GO:0045740	positive regulation of DNA replication	19	-5.92118	M1	1	0	19_GO:0048518 positive regulation of biological process	-5.92118	26.7118	11.158	27994	40	131	5	3.81679	1.67403	983|1017|1950|1956|3725	CDK1|CDK2|EGF|EGFR|JUN	-4.64886	0	50	0	0	-12.7295	29.3306
GO Biological Processes	GO:0051281	positive regulation of release of sequestered calcium ion into cytosol	19	-5.92118	M1	1	0	19_GO:0048519 negative regulation of biological process	-5.92118	26.7118	11.158	27994	40	131	5	3.81679	1.67403	581|1812|2946|3627|6373	BAX|DRD1|GSTM2|CXCL10|CXCL11	-4.64886	0	59	0	0	-11.5248	26.7118
GO Biological Processes	GO:0032409	regulation of transporter activity	19	-5.9194	M1	1	0	19_GO:0065007 biological regulation	-5.9194	7.34346	7.45857	27994	291	131	10	7.63359	2.31999	154|596|857|2697|2946|3458|4318|5444|5468|6347	ADRB2|BCL2|CAV1|GJA1|GSTM2|IFNG|MMP9|PON1|PPARG|CCL2	-4.64801	0	100	0	0	-7.50141	42.7389
GO Biological Processes	GO:0048640	negative regulation of developmental growth	19	-5.9193	M1	1	0	19_GO:0040007 growth	-5.9193	13.0075	8.84727	27994	115	131	7	5.34351	1.96496	153|154|1026|2697|5465|6532|6696	ADRB1|ADRB2|CDKN1A|GJA1|PPARA|SLC6A4|SPP1	-4.64801	0	127	1	1	-5.9193	30.5278
GO Biological Processes	GO:0010611	regulation of cardiac muscle hypertrophy	19	-5.90935	M1	1	0	19_GO:0032501 multicellular organismal process	-5.90935	17.5639	9.71642	27994	73	131	6	4.58015	1.82652	142|2475|3572|5465|5530|5578	PARP1|MTOR|IL6ST|PPARA|PPP3CA|PRKCA	-4.63858	0	61	0	0	-11.228	26.7118
GO Biological Processes	GO:0045732	positive regulation of protein catabolic process	19	-5.90256	M1	1	0	19_GO:0048518 positive regulation of biological process	-5.90256	8.50996	7.7726	27994	226	131	9	6.87023	2.21001	207|857|1950|2697|2932|3458|3553|4780|7124	AKT1|CAV1|EGF|GJA1|GSK3B|IFNG|IL1B|NFE2L2|TNF	-4.6323	0	89	0	0	-8.42736	10.2738
GO Biological Processes	GO:0032386	regulation of intracellular transport	19	-5.89803	M1	1	0	19_GO:0051179 localization	-5.89803	5.77553	6.95503	27994	444	131	12	9.16031	2.52033	983|1129|1812|2064|2932|3162|3458|3553|5579|5594|5743|7157	CDK1|CHRM2|DRD1|ERBB2|GSK3B|HMOX1|IFNG|IL1B|PRKCB|MAPK1|PTGS2|TP53	-4.62828	0	72	0	0	-9.79486	22.6646
GO Biological Processes	GO:0034250	positive regulation of cellular amide metabolic process	19	-5.88068	M1	1	0	19_GO:0048518 positive regulation of biological process	-5.88068	10.1759	8.17949	27994	168	131	8	6.10687	2.09214	836|2064|2475|3458|4780|5594|5970|7124	CASP3|ERBB2|MTOR|IFNG|NFE2L2|MAPK1|RELA|TNF	-4.61145	0	48	0	0	-13.0283	19.4268
GO Biological Processes	GO:0031670	cellular response to nutrient	19	-5.87429	M1	1	0	19_GO:0050896 response to stimulus	-5.87429	17.3266	9.64273	27994	74	131	6	4.58015	1.82652	1277|3162|5468|5743|6647|8648	COL1A1|HMOX1|PPARG|PTGS2|SOD1|NCOA1	-4.60607	0	97	0	0	-7.70056	17.3266
GO Biological Processes	GO:0051881	regulation of mitochondrial membrane potential	19	-5.87429	M1	1	0	19_GO:0065007 biological regulation	-5.87429	17.3266	9.64273	27994	74	131	6	4.58015	1.82652	142|207|581|596|598|6647	PARP1|AKT1|BAX|BCL2|BCL2L1|SOD1	-4.60607	0	58	0	0	-11.6428	35.6158
GO Biological Processes	GO:0014742	positive regulation of muscle hypertrophy	19	-5.86632	M1	1	0	19_GO:0048518 positive regulation of biological process	-5.86632	26.0603	11.0106	27994	41	131	5	3.81679	1.67403	142|2475|3572|5530|5578	PARP1|MTOR|IL6ST|PPP3CA|PRKCA	-4.59912	0	61	0	0	-11.228	26.7118
GO Biological Processes	GO:0071548	response to dexamethasone	19	-5.86632	M1	1	0	19_GO:0050896 response to stimulus	-5.86632	26.0603	11.0106	27994	41	131	5	3.81679	1.67403	842|1244|1956|2908|3383	CASP9|ABCC2|EGFR|NR3C1|ICAM1	-4.59912	0	12	0	0	-25.8818	34.4669
GO Biological Processes	GO:0038095	Fc-epsilon receptor signaling pathway	19	-5.86132	M1	1	0	19_GO:0002376 immune system process	-5.86132	10.1157	8.15011	27994	169	131	8	6.10687	2.09214	1147|2353|3551|3725|5530|5594|5599|5970	CHUK|FOS|IKBKB|JUN|PPP3CA|MAPK1|MAPK8|RELA	-4.59463	0	24	0	0	-19.0213	42.7389
GO Biological Processes	GO:0030518	intracellular steroid hormone receptor signaling pathway	19	-5.84396	M1	1	0	19_GO:0023052 signaling	-5.84396	12.6768	8.71558	27994	118	131	7	5.34351	1.96496	142|367|2099|2100|2908|4306|5241	PARP1|AR|ESR1|ESR2|NR3C1|NR3C2|PGR	-4.57777	0	5	0	0	-32.7337	19.2212
GO Biological Processes	GO:0016125	sterol metabolic process	19	-5.84208	M1	1	0	19_GO:0008152 metabolic process	-5.84208	10.0562	8.12097	27994	170	131	8	6.10687	2.09214	847|1544|1545|1576|2194|5444|5467|6647	CAT|CYP1A2|CYP1B1|CYP3A4|FASN|PON1|PPARD|SOD1	-4.5764	0	39	0	0	-14.9141	64.1084
GO Biological Processes	GO:0048762	mesenchymal cell differentiation	19	-5.83957	M1	1	0	19_GO:0032502 developmental process	-5.83957	8.36196	7.68711	27994	230	131	9	6.87023	2.21001	596|1277|2475|2932|3037|3091|3553|5594|6772	BCL2|COL1A1|MTOR|GSK3B|HAS2|HIF1A|IL1B|MAPK1|STAT1	-4.5744	0	126	0	0	-5.93287	53.4237
GO Biological Processes	GO:0042596	fear response	19	-5.8129	M1	1	0	19_GO:0032501 multicellular organismal process	-5.8129	25.4398	10.8683	27994	42	131	5	3.81679	1.67403	153|596|1803|1812|2697	ADRB1|BCL2|DPP4|DRD1|GJA1	-4.54874	0	107	0	0	-7.11591	25.4398
GO Biological Processes	GO:0060969	negative regulation of gene silencing	19	-5.8129	M1	1	0	19_GO:0048519 negative regulation of biological process	-5.8129	25.4398	10.8683	27994	42	131	5	3.81679	1.67403	2099|5468|5530|7124|7157	ESR1|PPARG|PPP3CA|TNF|TP53	-4.54874	0	99	0	0	-7.51638	61.0556
GO Biological Processes	GO:0014743	regulation of muscle hypertrophy	19	-5.80568	M1	1	0	19_GO:0032501 multicellular organismal process	-5.80568	16.8706	9.4996	27994	76	131	6	4.58015	1.82652	142|2475|3572|5465|5530|5578	PARP1|MTOR|IL6ST|PPARA|PPP3CA|PRKCA	-4.54253	0	61	0	0	-11.228	26.7118
GO Biological Processes	GO:0033077	T cell differentiation in thymus	19	-5.80568	M1	1	0	19_GO:0002376 immune system process	-5.80568	16.8706	9.4996	27994	76	131	6	4.58015	1.82652	596|2064|3552|3553|6647|7157	BCL2|ERBB2|IL1A|IL1B|SOD1|TP53	-4.54253	0	98	0	0	-7.6909	91.5834
GO Biological Processes	GO:0006914	autophagy	19	-5.79922	M1	1	0	19_GO:0008152 metabolic process	-5.79922	5.15405	6.67731	27994	539	131	13	9.92366	2.6122	154|207|596|836|2475|2932|3091|3099|3162|3315|3458|5599|7157	ADRB2|AKT1|BCL2|CASP3|MTOR|GSK3B|HIF1A|HK2|HMOX1|HSPB1|IFNG|MAPK8|TP53	-4.53708	0	9	0	0	-26.9935	25.1405
GO Biological Processes	GO:0061919	process utilizing autophagic mechanism	19	-5.79922	M1	1	0	19_GO:0009987 cellular process	-5.79922	5.15405	6.67731	27994	539	131	13	9.92366	2.6122	154|207|596|836|2475|2932|3091|3099|3162|3315|3458|5599|7157	ADRB2|AKT1|BCL2|CASP3|MTOR|GSK3B|HIF1A|HK2|HMOX1|HSPB1|IFNG|MAPK8|TP53	-4.53708	0	9	0	0	-26.9935	25.1405
GO Biological Processes	GO:0045861	negative regulation of proteolysis	19	-5.7884	M1	1	0	19_GO:0048519 negative regulation of biological process	-5.7884	6.26838	7.04263	27994	375	131	11	8.39695	2.42315	207|1800|4318|5054|5327|5743|5894|6590|7124|7157|7422	AKT1|DPEP1|MMP9|SERPINE1|PLAT|PTGS2|RAF1|SLPI|TNF|TP53|VEGFA	-4.52676	0	18	0	0	-21.0047	17.6445
GO Biological Processes	GO:0033189	response to vitamin A	19	-5.77444	M1	1	0	19_GO:0050896 response to stimulus	-5.77444	44.9883	13.1515	27994	19	131	4	3.05344	1.50323	847|1543|5467|5468	CAT|CYP1A1|PPARD|PPARG	-4.5158	0	78	0	0	-9.1828	77.7071
GO Biological Processes	GO:0045780	positive regulation of bone resorption	19	-5.77444	M1	1	0	19_GO:0048518 positive regulation of biological process	-5.77444	44.9883	13.1515	27994	19	131	4	3.05344	1.50323	760|1956|5578|6696	CA2|EGFR|PRKCA|SPP1	-4.5158	0	45	0	0	-13.7627	44.9883
GO Biological Processes	GO:0046852	positive regulation of bone remodeling	19	-5.77444	M1	1	0	19_GO:0048518 positive regulation of biological process	-5.77444	44.9883	13.1515	27994	19	131	4	3.05344	1.50323	760|1956|5578|6696	CA2|EGFR|PRKCA|SPP1	-4.5158	0	45	0	0	-13.7627	44.9883
GO Biological Processes	GO:0051546	keratinocyte migration	19	-5.77444	M1	1	0	19_GO:0040011 locomotion	-5.77444	44.9883	13.1515	27994	19	131	4	3.05344	1.50323	2475|3037|4318|5467	MTOR|HAS2|MMP9|PPARD	-4.5158	0	126	0	0	-5.93287	53.4237
GO Biological Processes	GO:0060252	positive regulation of glial cell proliferation	19	-5.77444	M1	1	0	19_GO:0008283 cell proliferation	-5.77444	44.9883	13.1515	27994	19	131	4	3.05344	1.50323	1869|2475|3553|7124	E2F1|MTOR|IL1B|TNF	-4.5158	0	11	0	0	-26.7386	213.695
GO Biological Processes	GO:1902176	negative regulation of oxidative stress-induced intrinsic apoptotic signaling pathway	19	-5.77444	M1	1	0	19_GO:0048519 negative regulation of biological process	-5.77444	44.9883	13.1515	27994	19	131	4	3.05344	1.50323	207|3091|3315|4780	AKT1|HIF1A|HSPB1|NFE2L2	-4.5158	0	33	0	0	-17.1314	47.4877
GO Biological Processes	GO:0002065	columnar/cuboidal epithelial cell differentiation	19	-5.77069	M1	1	0	19_GO:0032502 developmental process	-5.77069	12.3625	8.58858	27994	121	131	7	5.34351	1.96496	1026|2194|2932|3091|3572|5054|6647	CDKN1A|FASN|GSK3B|HIF1A|IL6ST|SERPINE1|SOD1	-4.51255	0	51	0	0	-12.6756	53.4237
GO Biological Processes	GO:0044270	cellular nitrogen compound catabolic process	19	-5.76755	M1	1	0	19_GO:0008152 metabolic process	-5.76755	4.40305	6.37925	27994	728	131	15	11.4504	2.78207	207|581|836|1576|1800|1869|2475|3091|3099|3162|3315|3458|5465|5578|7157	AKT1|BAX|CASP3|CYP3A4|DPEP1|E2F1|MTOR|HIF1A|HK2|HMOX1|HSPB1|IFNG|PPARA|PRKCA|TP53	-4.50991	0	9	0	0	-26.9935	25.1405
GO Biological Processes	GO:0071364	cellular response to epidermal growth factor stimulus	19	-5.76084	M1	1	0	19_GO:0050896 response to stimulus	-5.76084	24.8482	10.7309	27994	43	131	5	3.81679	1.67403	207|1277|1956|2064|2950	AKT1|COL1A1|EGFR|ERBB2|GSTP1	-4.5042	0	108	0	0	-7.06629	33.7413
GO Biological Processes	GO:0150077	regulation of neuroinflammatory response	19	-5.76084	M1	1	0	19_GO:0050896 response to stimulus	-5.76084	24.8482	10.7309	27994	43	131	5	3.81679	1.67403	3553|4314|4318|5743|7124	IL1B|MMP3|MMP9|PTGS2|TNF	-4.5042	0	11	0	0	-26.7386	213.695
GO Biological Processes	GO:1903522	regulation of blood circulation	19	-5.74887	M1	1	0	19_GO:0032501 multicellular organismal process	-5.74887	7.02943	7.24766	27994	304	131	10	7.63359	2.31999	152|153|207|857|1129|1956|2697|2946|3383|5743	ADRA2C|ADRB1|AKT1|CAV1|CHRM2|EGFR|GJA1|GSTM2|ICAM1|PTGS2	-4.49272	0	36	0	0	-16.0134	50.2811
GO Biological Processes	GO:0051928	positive regulation of calcium ion transport	19	-5.74671	M1	1	0	19_GO:0048518 positive regulation of biological process	-5.74671	12.2612	8.54724	27994	122	131	7	5.34351	1.96496	581|857|1812|2946|3627|6347|6373	BAX|CAV1|DRD1|GSTM2|CXCL10|CCL2|CXCL11	-4.49105	0	59	0	0	-11.5248	26.7118
GO Biological Processes	GO:0046777	protein autophosphorylation	19	-5.73225	M1	1	0	19_GO:0008152 metabolic process	-5.73225	8.11499	7.54238	27994	237	131	9	6.87023	2.21001	207|857|1956|2064|2475|2932|3645|3725|7422	AKT1|CAV1|EGFR|ERBB2|MTOR|GSK3B|INSRR|JUN|VEGFA	-4.47708	0	128	1	1	-5.73225	8.11499
GO Biological Processes	GO:0016241	regulation of macroautophagy	19	-5.72922	M1	1	0	19_GO:0050789 regulation of biological process	-5.72922	9.71339	7.9511	27994	176	131	8	6.10687	2.09214	154|207|836|2475|3091|3162|5599|7157	ADRB2|AKT1|CASP3|MTOR|HIF1A|HMOX1|MAPK8|TP53	-4.47505	0	9	0	0	-26.9935	25.1405
GO Biological Processes	GO:0021543	pallium development	19	-5.72922	M1	1	0	19_GO:0032502 developmental process	-5.72922	9.71339	7.9511	27994	176	131	8	6.10687	2.09214	581|836|1281|1812|1956|2932|3091|8648	BAX|CASP3|COL3A1|DRD1|EGFR|GSK3B|HIF1A|NCOA1	-4.47505	0	122	0	0	-6.2396	10.5964
GO Biological Processes	GO:1990266	neutrophil migration	19	-5.72294	M1	1	0	19_GO:0040011 locomotion	-5.72294	12.1615	8.50638	27994	123	131	7	5.34351	1.96496	1800|1803|3553|3576|3627|6347|6373	DPEP1|DPP4|IL1B|CXCL8|CXCL10|CCL2|CXCL11	-4.46926	0	42	0	0	-14.4051	14.5229
GO Biological Processes	GO:0000271	polysaccharide biosynthetic process	19	-5.70636	M1	1	0	19_GO:0008152 metabolic process	-5.70636	16.23	9.29481	27994	79	131	6	4.58015	1.82652	207|1950|2475|2932|3037|3481	AKT1|EGF|MTOR|GSK3B|HAS2|IGF2	-4.45366	0	29	0	0	-18.4437	33.7413
GO Biological Processes	GO:0010827	regulation of glucose transmembrane transport	19	-5.70636	M1	1	0	19_GO:0051179 localization	-5.70636	16.23	9.29481	27994	79	131	6	4.58015	1.82652	207|3099|3553|4780|5579|7124	AKT1|HK2|IL1B|NFE2L2|PRKCB|TNF	-4.45366	0	104	0	0	-7.26254	29.1402
GO Biological Processes	GO:0060745	mammary gland branching involved in pregnancy	19	-5.70279	M1	1	0	19_GO:0022414 reproductive process	-5.70279	106.847	17.7794	27994	6	131	3	2.29008	1.30695	367|2099|5241	AR|ESR1|PGR	-4.45108	0	31	0	0	-18.0915	106.847
GO Biological Processes	GO:0070141	response to UV-A	19	-5.70279	M1	1	0	19_GO:0050896 response to stimulus	-5.70279	106.847	17.7794	27994	6	131	3	2.29008	1.30695	207|595|1956	AKT1|CCND1|EGFR	-4.45108	0	92	0	0	-8.02954	106.847
GO Biological Processes	GO:0019439	aromatic compound catabolic process	19	-5.68053	M1	1	0	19_GO:0008152 metabolic process	-5.68053	4.33165	6.29805	27994	740	131	15	11.4504	2.78207	207|581|836|1543|1869|2475|3091|3099|3162|3315|3458|5444|5465|5578|7157	AKT1|BAX|CASP3|CYP1A1|E2F1|MTOR|HIF1A|HK2|HMOX1|HSPB1|IFNG|PON1|PPARA|PRKCA|TP53	-4.42984	0	9	0	0	-26.9935	25.1405
GO Biological Processes	GO:0007252	I-kappaB phosphorylation	19	-5.6791	M1	1	0	19_GO:0023052 signaling	-5.6791	42.7389	12.8034	27994	20	131	4	3.05344	1.50323	207|1147|3551|7124	AKT1|CHUK|IKBKB|TNF	-4.42984	0	24	0	0	-19.0213	42.7389
GO Biological Processes	GO:0051767	nitric-oxide synthase biosynthetic process	19	-5.6791	M1	1	0	19_GO:0008152 metabolic process	-5.6791	42.7389	12.8034	27994	20	131	4	3.05344	1.50323	2950|3458|6347|6772	GSTP1|IFNG|CCL2|STAT1	-4.42984	0	100	0	0	-7.50141	42.7389
GO Biological Processes	GO:0051769	regulation of nitric-oxide synthase biosynthetic process	19	-5.6791	M1	1	0	19_GO:0050789 regulation of biological process	-5.6791	42.7389	12.8034	27994	20	131	4	3.05344	1.50323	2950|3458|6347|6772	GSTP1|IFNG|CCL2|STAT1	-4.42984	0	100	0	0	-7.50141	42.7389
GO Biological Processes	GO:1902004	positive regulation of amyloid-beta formation	19	-5.6791	M1	1	0	19_GO:0048518 positive regulation of biological process	-5.6791	42.7389	12.8034	27994	20	131	4	3.05344	1.50323	836|3458|5970|7124	CASP3|IFNG|RELA|TNF	-4.42984	0	11	0	0	-26.7386	213.695
GO Biological Processes	GO:1903578	regulation of ATP metabolic process	19	-5.67604	M1	1	0	19_GO:0050789 regulation of biological process	-5.67604	11.9669	8.42606	27994	125	131	7	5.34351	1.96496	142|891|983|3091|3458|5465|7157	PARP1|CCNB1|CDK1|HIF1A|IFNG|PPARA|TP53	-4.42726	0	102	0	0	-7.42388	36.8439
GO Biological Processes	GO:0048678	response to axon injury	19	-5.67416	M1	1	0	19_GO:0050896 response to stimulus	-5.67416	16.0271	9.22902	27994	80	131	6	4.58015	1.82652	581|596|983|3725|6647|6696	BAX|BCL2|CDK1|JUN|SOD1|SPP1	-4.42684	0	129	1	1	-5.67416	16.0271
GO Biological Processes	GO:0055021	regulation of cardiac muscle tissue growth	19	-5.67416	M1	1	0	19_GO:0040007 growth	-5.67416	16.0271	9.22902	27994	80	131	6	4.58015	1.82652	891|983|2475|2697|5465|5594	CCNB1|CDK1|MTOR|GJA1|PPARA|MAPK1	-4.42684	0	63	0	0	-11.069	71.2316
GO Biological Processes	GO:1900182	positive regulation of protein localization to nucleus	19	-5.67416	M1	1	0	19_GO:0048518 positive regulation of biological process	-5.67416	16.0271	9.22902	27994	80	131	6	4.58015	1.82652	142|207|983|3458|5594|5743	PARP1|AKT1|CDK1|IFNG|MAPK1|PTGS2	-4.42684	0	72	0	0	-9.79486	22.6646
GO Biological Processes	GO:0014002	astrocyte development	19	-5.66056	M1	1	0	19_GO:0032502 developmental process	-5.66056	23.7439	10.4697	27994	45	131	5	3.81679	1.67403	1812|1956|3458|3553|7124	DRD1|EGFR|IFNG|IL1B|TNF	-4.41421	0	11	0	0	-26.7386	213.695
GO Biological Processes	GO:0060443	mammary gland morphogenesis	19	-5.66056	M1	1	0	19_GO:0032502 developmental process	-5.66056	23.7439	10.4697	27994	45	131	5	3.81679	1.67403	367|581|857|2099|5241	AR|BAX|CAV1|ESR1|PGR	-4.41421	0	31	0	0	-18.0915	106.847
GO Biological Processes	GO:1905330	regulation of morphogenesis of an epithelium	19	-5.6384	M1	1	0	19_GO:0032502 developmental process	-5.6384	9.44507	7.81565	27994	181	131	8	6.10687	2.09214	367|2099|2475|2697|3627|6772|7124|7422	AR|ESR1|MTOR|GJA1|CXCL10|STAT1|TNF|VEGFA	-4.39254	0	31	0	0	-18.0915	106.847
GO Biological Processes	GO:0016570	histone modification	19	-5.63286	M1	1	0	19_GO:0071840 cellular component organization or biogenesis	-5.63286	5.44445	6.67002	27994	471	131	12	9.16031	2.52033	891|983|1017|1812|3481|3553|5578|5579|5599|7157|7422|8648	CCNB1|CDK1|CDK2|DRD1|IGF2|IL1B|PRKCA|PRKCB|MAPK8|TP53|VEGFA|NCOA1	-4.38748	0	63	0	0	-11.069	71.2316
GO Biological Processes	GO:1900180	regulation of protein localization to nucleus	19	-5.62995	M1	1	0	19_GO:0051179 localization	-5.62995	11.7784	8.34756	27994	127	131	7	5.34351	1.96496	142|207|983|2932|3458|5594|5743	PARP1|AKT1|CDK1|GSK3B|IFNG|MAPK1|PTGS2	-4.38505	0	72	0	0	-9.79486	22.6646
GO Biological Processes	GO:0032570	response to progesterone	19	-5.61221	M1	1	0	19_GO:0050896 response to stimulus	-5.61221	23.2277	10.3453	27994	46	131	5	3.81679	1.67403	857|2353|5970|8648|10499	CAV1|FOS|RELA|NCOA1|NCOA2	-4.3678	0	130	1	1	-5.61221	23.2277
GO Biological Processes	GO:0006469	negative regulation of protein kinase activity	19	-5.59942	M1	1	0	19_GO:0048519 negative regulation of biological process	-5.59942	7.8181	7.36481	27994	246	131	9	6.87023	2.21001	207|836|857|1026|2950|3315|3458|3553|5925	AKT1|CASP3|CAV1|CDKN1A|GSTP1|HSPB1|IFNG|IL1B|RB1	-4.35549	0	56	0	0	-12.0768	11.5511
GO Biological Processes	GO:0051346	negative regulation of hydrolase activity	19	-5.59512	M1	1	0	19_GO:0065007 biological regulation	-5.59512	5.3986	6.62966	27994	475	131	12	9.16031	2.52033	207|1800|2932|3551|4318|5054|5743|5894|6590|7124|7157|7422	AKT1|DPEP1|GSK3B|IKBKB|MMP9|SERPINE1|PTGS2|RAF1|SLPI|TNF|TP53|VEGFA	-4.35167	0	18	0	0	-21.0047	17.6445
GO Biological Processes	GO:0009110	vitamin biosynthetic process	19	-5.58891	M1	1	0	19_GO:0008152 metabolic process	-5.58891	40.7037	12.4801	27994	21	131	4	3.05344	1.50323	1576|3458|3553|7124	CYP3A4|IFNG|IL1B|TNF	-4.34786	0	11	0	0	-26.7386	213.695
GO Biological Processes	GO:0017000	antibiotic biosynthetic process	19	-5.58891	M1	1	0	19_GO:0008152 metabolic process	-5.58891	40.7037	12.4801	27994	21	131	4	3.05344	1.50323	1543|1544|6647|50506	CYP1A1|CYP1A2|SOD1|DUOX2	-4.34786	0	43	0	0	-14.0637	50.2811
GO Biological Processes	GO:0036499	PERK-mediated unfolded protein response	19	-5.58891	M1	1	0	19_GO:0023052 signaling	-5.58891	40.7037	12.4801	27994	21	131	4	3.05344	1.50323	3309|3576|4780|6347	HSPA5|CXCL8|NFE2L2|CCL2	-4.34786	0	82	0	0	-8.85563	40.7037
GO Biological Processes	GO:0061042	vascular wound healing	19	-5.58891	M1	1	0	19_GO:0032502 developmental process	-5.58891	40.7037	12.4801	27994	21	131	4	3.05344	1.50323	240|5054|7124|7422	ALOX5|SERPINE1|TNF|VEGFA	-4.34786	0	131	1	1	-5.58891	91.5834
GO Biological Processes	GO:0071498	cellular response to fluid shear stress	19	-5.58891	M1	1	0	19_GO:0050896 response to stimulus	-5.58891	40.7037	12.4801	27994	21	131	4	3.05344	1.50323	760|3037|4780|5743	CA2|HAS2|NFE2L2|PTGS2	-4.34786	0	96	0	0	-7.78936	40.7037
GO Biological Processes	GO:0010950	positive regulation of endopeptidase activity	19	-5.58524	M1	1	0	19_GO:0048518 positive regulation of biological process	-5.58524	9.29107	7.73687	27994	184	131	8	6.10687	2.09214	581|841|842|1509|2152|4609|5468|7124	BAX|CASP8|CASP9|CTSD|F3|MYC|PPARG|TNF	-4.34467	0	52	0	0	-12.6089	14.2463
GO Biological Processes	GO:0060359	response to ammonium ion	19	-5.58466	M1	1	0	19_GO:0050896 response to stimulus	-5.58466	11.5958	8.27079	27994	129	131	7	5.34351	1.96496	836|1129|1812|2475|3309|5594|5970	CASP3|CHRM2|DRD1|MTOR|HSPA5|MAPK1|RELA	-4.34456	0	132	1	1	-5.58466	12.2111
GO Biological Processes	GO:0022617	extracellular matrix disassembly	19	-5.58013	M1	1	0	19_GO:0071840 cellular component organization or biogenesis	-5.58013	15.4478	9.03857	27994	83	131	6	4.58015	1.82652	1803|4312|4313|4314|4318|5644	DPP4|MMP1|MMP2|MMP3|MMP9|PRSS1	-4.34051	0	55	0	0	-12.2825	22.7335
GO Biological Processes	GO:0014075	response to amine	19	-5.56499	M1	1	0	19_GO:0050896 response to stimulus	-5.56499	22.7335	10.2248	27994	47	131	5	3.81679	1.67403	983|1812|3383|5530|6647	CDK1|DRD1|ICAM1|PPP3CA|SOD1	-4.32633	0	90	0	0	-8.26865	28.2238
GO Biological Processes	GO:0030574	collagen catabolic process	19	-5.56499	M1	1	0	19_GO:0008152 metabolic process	-5.56499	22.7335	10.2248	27994	47	131	5	3.81679	1.67403	1509|4312|4313|4314|4318	CTSD|MMP1|MMP2|MMP3|MMP9	-4.32633	0	55	0	0	-12.2825	22.7335
GO Biological Processes	GO:0071482	cellular response to light stimulus	19	-5.5623	M1	1	0	19_GO:0050896 response to stimulus	-5.5623	11.5066	8.23304	27994	130	131	7	5.34351	1.96496	142|581|842|1026|4609|5743|7157	PARP1|BAX|CASP9|CDKN1A|MYC|PTGS2|TP53	-4.32411	0	19	0	0	-20.3862	38.1598
GO Biological Processes	GO:0038061	NIK/NF-kappaB signaling	19	-5.53305	M1	1	0	19_GO:0023052 signaling	-5.53305	9.14202	7.65988	27994	187	131	8	6.10687	2.09214	207|1147|1956|3553|4306|4792|5970|7124	AKT1|CHUK|EGFR|IL1B|NR3C2|NFKBIA|RELA|TNF	-4.29581	0	85	0	0	-8.78624	33.2414
GO Biological Processes	GO:0061138	morphogenesis of a branching epithelium	19	-5.53305	M1	1	0	19_GO:0032502 developmental process	-5.53305	9.14202	7.65988	27994	187	131	8	6.10687	2.09214	367|596|1950|2099|4609|5241|7124|7422	AR|BCL2|EGF|ESR1|MYC|PGR|TNF|VEGFA	-4.29581	0	31	0	0	-18.0915	106.847
GO Biological Processes	GO:0016569	covalent chromatin modification	19	-5.51158	M1	1	0	19_GO:0071840 cellular component organization or biogenesis	-5.51158	5.29821	6.54051	27994	484	131	12	9.16031	2.52033	891|983|1017|1812|3481|3553|5578|5579|5599|7157|7422|8648	CCNB1|CDK1|CDK2|DRD1|IGF2|IL1B|PRKCA|PRKCB|MAPK8|TP53|VEGFA|NCOA1	-4.27482	0	63	0	0	-11.069	71.2316
GO Biological Processes	GO:0001776	leukocyte homeostasis	19	-5.48972	M1	1	0	19_GO:0002376 immune system process	-5.48972	14.9089	8.85778	27994	86	131	6	4.58015	1.82652	207|581|596|836|3091|3559	AKT1|BAX|BCL2|CASP3|HIF1A|IL2RA	-4.25391	0	95	0	0	-7.88155	37.7108
GO Biological Processes	GO:0006112	energy reserve metabolic process	19	-5.48972	M1	1	0	19_GO:0008152 metabolic process	-5.48972	14.9089	8.85778	27994	86	131	6	4.58015	1.82652	207|2475|2932|3481|3572|4609	AKT1|MTOR|GSK3B|IGF2|IL6ST|MYC	-4.25391	0	29	0	0	-18.4437	33.7413
GO Biological Processes	GO:0035196	production of miRNAs involved in gene silencing by miRNA	19	-5.47373	M1	1	0	19_GO:0048519 negative regulation of biological process	-5.47373	21.8056	9.99476	27994	49	131	5	3.81679	1.67403	1956|2099|5530|7124|7157	EGFR|ESR1|PPP3CA|TNF|TP53	-4.23933	0	99	0	0	-7.51638	61.0556
GO Biological Processes	GO:0070231	T cell apoptotic process	19	-5.47373	M1	1	0	19_GO:0009987 cellular process	-5.47373	21.8056	9.99476	27994	49	131	5	3.81679	1.67403	207|581|3091|3559|7157	AKT1|BAX|HIF1A|IL2RA|TP53	-4.23933	0	95	0	0	-7.88155	37.7108
GO Biological Processes	GO:0090199	regulation of release of cytochrome c from mitochondria	19	-5.47373	M1	1	0	19_GO:0023052 signaling	-5.47373	21.8056	9.99476	27994	49	131	5	3.81679	1.67403	207|581|598|4318|7157	AKT1|BAX|BCL2L1|MMP9|TP53	-4.23933	0	95	0	0	-7.88155	37.7108
GO Biological Processes	GO:0034765	regulation of ion transmembrane transport	19	-5.46597	M1	1	0	19_GO:0051179 localization	-5.46597	5.24404	6.49194	27994	489	131	12	9.16031	2.52033	154|207|581|857|1812|2475|2946|3458|3627|4318|6347|6373	ADRB2|AKT1|BAX|CAV1|DRD1|MTOR|GSTM2|IFNG|CXCL10|MMP9|CCL2|CXCL11	-4.23204	0	59	0	0	-11.5248	26.7118
GO Biological Processes	GO:0031622	positive regulation of fever generation	19	-5.46124	M1	1	0	19_GO:0048518 positive regulation of biological process	-5.46124	91.5834	16.4349	27994	7	131	3	2.29008	1.30695	3553|5743|7124	IL1B|PTGS2|TNF	-4.22924	0	11	0	0	-26.7386	213.695
GO Biological Processes	GO:0035234	ectopic germ cell programmed cell death	19	-5.46124	M1	1	0	19_GO:0022414 reproductive process	-5.46124	91.5834	16.4349	27994	7	131	3	2.29008	1.30695	581|3552|3553	BAX|IL1A|IL1B	-4.22924	0	98	0	0	-7.6909	91.5834
GO Biological Processes	GO:0060558	regulation of calcidiol 1-monooxygenase activity	19	-5.46124	M1	1	0	19_GO:0050789 regulation of biological process	-5.46124	91.5834	16.4349	27994	7	131	3	2.29008	1.30695	3458|3553|7124	IFNG|IL1B|TNF	-4.22924	0	11	0	0	-26.7386	213.695
GO Biological Processes	GO:0061044	negative regulation of vascular wound healing	19	-5.46124	M1	1	0	19_GO:0048519 negative regulation of biological process	-5.46124	91.5834	16.4349	27994	7	131	3	2.29008	1.30695	240|5054|7124	ALOX5|SERPINE1|TNF	-4.22924	0	131	0	0	-5.58891	91.5834
GO Biological Processes	GO:0034637	cellular carbohydrate biosynthetic process	19	-5.46034	M1	1	0	19_GO:0008152 metabolic process	-5.46034	14.7376	8.79952	27994	87	131	6	4.58015	1.82652	207|231|2475|2932|3037|3481	AKT1|AKR1B1|MTOR|GSK3B|HAS2|IGF2	-4.22924	0	29	0	0	-18.4437	33.7413
GO Biological Processes	GO:0060420	regulation of heart growth	19	-5.46034	M1	1	0	19_GO:0040007 growth	-5.46034	14.7376	8.79952	27994	87	131	6	4.58015	1.82652	891|983|2475|2697|5465|5594	CCNB1|CDK1|MTOR|GJA1|PPARA|MAPK1	-4.22924	0	63	0	0	-11.069	71.2316
GO Biological Processes	GO:0071560	cellular response to transforming growth factor beta stimulus	19	-5.45817	M1	1	0	19_GO:0050896 response to stimulus	-5.45817	7.5127	7.17778	27994	256	131	9	6.87023	2.21001	142|857|1277|1281|2353|2908|3309|3725|7157	PARP1|CAV1|COL1A1|COL3A1|FOS|NR3C1|HSPA5|JUN|TP53	-4.22799	0	118	0	0	-6.29727	17.4445
GO Biological Processes	GO:2000027	regulation of animal organ morphogenesis	19	-5.45817	M1	1	0	19_GO:0032502 developmental process	-5.45817	7.5127	7.17778	27994	256	131	9	6.87023	2.21001	367|581|596|860|2099|4609|6772|7124|7422	AR|BAX|BCL2|RUNX2|ESR1|MYC|STAT1|TNF|VEGFA	-4.22799	0	31	0	0	-18.0915	106.847
GO Biological Processes	GO:0042113	B cell activation	19	-5.45507	M1	1	0	19_GO:0002376 immune system process	-5.45507	6.51508	6.88909	27994	328	131	10	7.63359	2.31999	196|581|596|836|841|959|1026|5579|7157|7412	AHR|BAX|BCL2|CASP3|CASP8|CD40LG|CDKN1A|PRKCB|TP53|VCAM1	-4.22536	0	83	0	0	-8.8504	45.7917
GO Biological Processes	GO:0048015	phosphatidylinositol-mediated signaling	19	-5.4481	M1	1	0	19_GO:0023052 signaling	-5.4481	8.90394	7.53534	27994	192	131	8	6.10687	2.09214	207|847|1956|2064|5467|5594|7124|653361	AKT1|CAT|EGFR|ERBB2|PPARD|MAPK1|TNF|NCF1	-4.21886	0	124	0	0	-6.16606	11.101
GO Biological Processes	GO:0006766	vitamin metabolic process	19	-5.43201	M1	1	0	19_GO:0008152 metabolic process	-5.43201	10.999	8.01488	27994	136	131	7	5.34351	1.96496	1543|1576|3458|3553|5467|5644|7124	CYP1A1|CYP3A4|IFNG|IL1B|PPARD|PRSS1|TNF	-4.20361	0	11	0	0	-26.7386	213.695
GO Biological Processes	GO:0032642	regulation of chemokine production	19	-5.43133	M1	1	0	19_GO:0032501 multicellular organismal process	-5.43133	14.5701	8.74222	27994	88	131	6	4.58015	1.82652	2950|3091|3162|3458|3553|7124	GSTP1|HIF1A|HMOX1|IFNG|IL1B|TNF	-4.20361	0	11	0	0	-26.7386	213.695
GO Biological Processes	GO:0046889	positive regulation of lipid biosynthetic process	19	-5.43133	M1	1	0	19_GO:0048518 positive regulation of biological process	-5.43133	14.5701	8.74222	27994	88	131	6	4.58015	1.82652	207|2475|3458|3553|5743|7124	AKT1|MTOR|IFNG|IL1B|PTGS2|TNF	-4.20361	0	11	0	0	-26.7386	213.695
GO Biological Processes	GO:0010951	negative regulation of endopeptidase activity	19	-5.43067	M1	1	0	19_GO:0048519 negative regulation of biological process	-5.43067	7.45446	7.14158	27994	258	131	9	6.87023	2.21001	207|1800|4318|5054|5743|5894|6590|7124|7422	AKT1|DPEP1|MMP9|SERPINE1|PTGS2|RAF1|SLPI|TNF|VEGFA	-4.20361	0	18	0	0	-21.0047	17.6445
GO Biological Processes	GO:0097300	programmed necrotic cell death	19	-5.4296	M1	1	0	19_GO:0009987 cellular process	-5.4296	21.3695	9.88477	27994	50	131	5	3.81679	1.67403	581|841|857|7124|7157	BAX|CASP8|CAV1|TNF|TP53	-4.20361	0	112	0	0	-6.7819	71.2316
GO Biological Processes	GO:1904036	negative regulation of epithelial cell apoptotic process	19	-5.4296	M1	1	0	19_GO:0048519 negative regulation of biological process	-5.4296	21.3695	9.88477	27994	50	131	5	3.81679	1.67403	2475|3162|3383|4780|5054	MTOR|HMOX1|ICAM1|NFE2L2|SERPINE1	-4.20361	0	66	0	0	-10.9361	21.3695
GO Biological Processes	GO:1904707	positive regulation of vascular smooth muscle cell proliferation	19	-5.4296	M1	1	0	19_GO:0008283 cell proliferation	-5.4296	21.3695	9.88477	27994	50	131	5	3.81679	1.67403	2697|3725|4313|4318|7124	GJA1|JUN|MMP2|MMP9|TNF	-4.20361	0	21	0	0	-19.9812	24.8965
GO Biological Processes	GO:0007219	Notch signaling pathway	19	-5.39831	M1	1	0	19_GO:0023052 signaling	-5.39831	8.76696	7.46277	27994	195	131	8	6.10687	2.09214	207|1950|1956|3559|3572|4609|4792|6772	AKT1|EGF|EGFR|IL2RA|IL6ST|MYC|NFKBIA|STAT1	-4.17278	0	117	0	0	-6.34231	45.7917
GO Biological Processes	GO:0071354	cellular response to interleukin-6	19	-5.38641	M1	1	0	19_GO:0050896 response to stimulus	-5.38641	20.9505	9.77795	27994	51	131	5	3.81679	1.67403	1244|3383|3572|5970|6772	ABCC2|ICAM1|IL6ST|RELA|STAT1	-4.16134	0	133	1	1	-5.38641	20.9505
GO Biological Processes	GO:0048017	inositol lipid-mediated signaling	19	-5.38191	M1	1	0	19_GO:0023052 signaling	-5.38191	8.72223	7.43893	27994	196	131	8	6.10687	2.09214	207|847|1956|2064|5467|5594|7124|653361	AKT1|CAT|EGFR|ERBB2|PPARD|MAPK1|TNF|NCF1	-4.15776	0	124	0	0	-6.16606	11.101
GO Biological Processes	GO:0050728	negative regulation of inflammatory response	19	-5.38191	M1	1	0	19_GO:0048519 negative regulation of biological process	-5.38191	8.72223	7.43893	27994	196	131	8	6.10687	2.09214	240|2950|3559|5465|5467|5468|5925|6647	ALOX5|GSTP1|IL2RA|PPARA|PPARD|PPARG|RB1|SOD1	-4.15776	0	49	0	0	-13.0106	8.72223
GO Biological Processes	GO:0071559	response to transforming growth factor beta	19	-5.3764	M1	1	0	19_GO:0050896 response to stimulus	-5.3764	7.34066	7.07035	27994	262	131	9	6.87023	2.21001	142|857|1277|1281|2353|2908|3309|3725|7157	PARP1|CAV1|COL1A1|COL3A1|FOS|NR3C1|HSPA5|JUN|TP53	-4.15271	0	118	0	0	-6.29727	17.4445
GO Biological Processes	GO:0006919	activation of cysteine-type endopeptidase activity involved in apoptotic process	19	-5.37438	M1	1	0	19_GO:0048518 positive regulation of biological process	-5.37438	14.2463	8.63037	27994	90	131	6	4.58015	1.82652	581|841|842|2152|5468|7124	BAX|CASP8|CASP9|F3|PPARG|TNF	-4.15115	0	52	0	0	-12.6089	14.2463
GO Biological Processes	GO:0007187	G protein-coupled receptor signaling pathway, coupled to cyclic nucleotide second messenger	19	-5.36298	M1	1	0	19_GO:0023052 signaling	-5.36298	7.31274	7.05277	27994	263	131	9	6.87023	2.21001	152|153|154|1129|1812|3627|5578|6347|6373	ADRA2C|ADRB1|ADRB2|CHRM2|DRD1|CXCL10|PRKCA|CCL2|CXCL11	-4.14021	0	127	0	0	-5.9193	30.5278
GO Biological Processes	GO:0006694	steroid biosynthetic process	19	-5.34938	M1	1	0	19_GO:0008152 metabolic process	-5.34938	8.63413	7.39175	27994	198	131	8	6.10687	2.09214	231|1543|1576|2194|3458|3553|6647|7124	AKR1B1|CYP1A1|CYP3A4|FASN|IFNG|IL1B|SOD1|TNF	-4.12707	0	11	0	0	-26.7386	213.695
GO Biological Processes	GO:0046427	positive regulation of JAK-STAT cascade	19	-5.34641	M1	1	0	19_GO:0048518 positive regulation of biological process	-5.34641	14.0898	8.57577	27994	91	131	6	4.58015	1.82652	231|1545|3458|3572|7124|7422	AKR1B1|CYP1B1|IFNG|IL6ST|TNF|VEGFA	-4.12548	0	77	0	0	-9.24192	27.7012
GO Biological Processes	GO:0046849	bone remodeling	19	-5.34641	M1	1	0	19_GO:0032501 multicellular organismal process	-5.34641	14.0898	8.57577	27994	91	131	6	4.58015	1.82652	154|760|1956|2697|5578|6696	ADRB2|CA2|EGFR|GJA1|PRKCA|SPP1	-4.12548	0	45	0	0	-13.7627	44.9883
GO Biological Processes	GO:0060333	interferon-gamma-mediated signaling pathway	19	-5.34641	M1	1	0	19_GO:0002376 immune system process	-5.34641	14.0898	8.57577	27994	91	131	6	4.58015	1.82652	3383|3458|5468|6772|7157|7412	ICAM1|IFNG|PPARG|STAT1|TP53|VCAM1	-4.12548	0	115	0	0	-6.56929	35.6158
GO Biological Processes	GO:1902993	positive regulation of amyloid precursor protein catabolic process	19	-5.34433	M1	1	0	19_GO:0048518 positive regulation of biological process	-5.34433	35.6158	11.6327	27994	24	131	4	3.05344	1.50323	836|3458|5970|7124	CASP3|IFNG|RELA|TNF	-4.12411	0	11	0	0	-26.7386	213.695
GO Biological Processes	GO:0010883	regulation of lipid storage	19	-5.34413	M1	1	0	19_GO:0051179 localization	-5.34413	20.5476	9.67413	27994	52	131	5	3.81679	1.67403	4792|5465|5467|5468|7124	NFKBIA|PPARA|PPARD|PPARG|TNF	-4.12411	0	73	0	0	-9.68214	64.1084
GO Biological Processes	GO:0019933	cAMP-mediated signaling	19	-5.33325	M1	1	0	19_GO:0023052 signaling	-5.33325	8.59074	7.36841	27994	199	131	8	6.10687	2.09214	152|153|154|196|1812|3627|5578|6373	ADRA2C|ADRB1|ADRB2|AHR|DRD1|CXCL10|PRKCA|CXCL11	-4.11369	0	127	0	0	-5.9193	30.5278
GO Biological Processes	GO:1905897	regulation of response to endoplasmic reticulum stress	19	-5.31878	M1	1	0	19_GO:0050896 response to stimulus	-5.31878	13.9366	8.52203	27994	92	131	6	4.58015	1.82652	240|581|598|857|3309|4780	ALOX5|BAX|BCL2L1|CAV1|HSPA5|NFE2L2	-4.09967	0	82	0	0	-8.85563	40.7037
GO Biological Processes	GO:0015711	organic anion transport	19	-5.3063	M1	1	0	19_GO:0051179 localization	-5.3063	5.05786	6.32243	27994	507	131	12	9.16031	2.52033	207|760|1244|2697|3553|5321|5465|5467|5468|8648|9429|10499	AKT1|CA2|ABCC2|GJA1|IL1B|PLA2G4A|PPARA|PPARD|PPARG|NCOA1|ABCG2|NCOA2	-4.08765	0	93	0	0	-8.02334	14.8105
GO Biological Processes	GO:0001763	morphogenesis of a branching structure	19	-5.30127	M1	1	0	19_GO:0032502 developmental process	-5.30127	8.50526	7.32222	27994	201	131	8	6.10687	2.09214	367|596|1950|2099|4609|5241|7124|7422	AR|BCL2|EGF|ESR1|MYC|PGR|TNF|VEGFA	-4.08307	0	31	0	0	-18.0915	106.847
GO Biological Processes	GO:0006839	mitochondrial transport	19	-5.29675	M1	1	0	19_GO:0051179 localization	-5.29675	7.17631	6.96626	27994	268	131	9	6.87023	2.21001	581|596|598|841|1869|2932|3099|5599|7157	BAX|BCL2|BCL2L1|CASP8|E2F1|GSK3B|HK2|MAPK8|TP53	-4.07991	0	53	0	0	-12.5473	42.7389
GO Biological Processes	GO:0033673	negative regulation of kinase activity	19	-5.29675	M1	1	0	19_GO:0048519 negative regulation of biological process	-5.29675	7.17631	6.96626	27994	268	131	9	6.87023	2.21001	207|836|857|1026|2950|3315|3458|3553|5925	AKT1|CASP3|CAV1|CDKN1A|GSTP1|HSPB1|IFNG|IL1B|RB1	-4.07991	0	56	0	0	-12.0768	11.5511
GO Biological Processes	GO:0072331	signal transduction by p53 class mediator	19	-5.29675	M1	1	0	19_GO:0023052 signaling	-5.29675	7.17631	6.96626	27994	268	131	9	6.87023	2.21001	207|581|596|891|983|1017|1026|1869|7157	AKT1|BAX|BCL2|CCNB1|CDK1|CDK2|CDKN1A|E2F1|TP53	-4.07991	0	50	0	0	-12.7295	29.3306
GO Biological Processes	GO:0019058	viral life cycle	19	-5.29498	M1	1	0	19_GO:0051704 multi-organism process	-5.29498	6.24838	6.6961	27994	342	131	10	7.63359	2.31999	596|857|983|1803|1956|3383|3576|6347|6590|7124	BCL2|CAV1|CDK1|DPP4|EGFR|ICAM1|CXCL8|CCL2|SLPI|TNF	-4.07859	0	134	1	1	-5.29498	8.6633
GO Biological Processes	GO:0045185	maintenance of protein location	19	-5.29148	M1	1	0	19_GO:0051179 localization	-5.29148	13.7868	8.46912	27994	93	131	6	4.58015	1.82652	207|857|2697|3099|3309|4792	AKT1|CAV1|GJA1|HK2|HSPA5|NFKBIA	-4.07554	0	119	0	0	-6.28519	31.4257
GO Biological Processes	GO:0048598	embryonic morphogenesis	19	-5.27638	M1	1	0	19_GO:0032502 developmental process	-5.27638	4.61467	6.14754	27994	602	131	13	9.92366	2.6122	367|581|836|860|2697|3091|3481|4313|4318|5594|6647|7157|8648	AR|BAX|CASP3|RUNX2|GJA1|HIF1A|IGF2|MMP2|MMP9|MAPK1|SOD1|TP53|NCOA1	-4.0609	0	135	1	1	-5.27638	5.23761
GO Biological Processes	GO:0090150	establishment of protein localization to membrane	19	-5.27273	M1	1	0	19_GO:0051179 localization	-5.27273	6.21205	6.6694	27994	344	131	10	7.63359	2.31999	581|596|841|1869|1956|2064|3309|5599|7157|653361	BAX|BCL2|CASP8|E2F1|EGFR|ERBB2|HSPA5|MAPK8|TP53|NCF1	-4.0577	0	53	0	0	-12.5473	42.7389
GO Biological Processes	GO:0009404	toxin metabolic process	19	-5.27019	M1	1	0	19_GO:0008152 metabolic process	-5.27019	34.1911	11.3841	27994	25	131	4	3.05344	1.50323	1543|1544|1545|4780	CYP1A1|CYP1A2|CYP1B1|NFE2L2	-4.05696	0	39	0	0	-14.9141	64.1084
GO Biological Processes	GO:0010869	regulation of receptor biosynthetic process	19	-5.27019	M1	1	0	19_GO:0050789 regulation of biological process	-5.27019	34.1911	11.3841	27994	25	131	4	3.05344	1.50323	3091|3458|5465|5468	HIF1A|IFNG|PPARA|PPARG	-4.05696	0	102	0	0	-7.42388	36.8439
GO Biological Processes	GO:0050927	positive regulation of positive chemotaxis	19	-5.27019	M1	1	0	19_GO:0040011 locomotion	-5.27019	34.1911	11.3841	27994	25	131	4	3.05344	1.50323	2152|2155|3576|7422	F3|F7|CXCL8|VEGFA	-4.05696	0	136	1	1	-5.27019	34.1911
GO Biological Processes	GO:1904385	cellular response to angiotensin	19	-5.27019	M1	1	0	19_GO:0050896 response to stimulus	-5.27019	34.1911	11.3841	27994	25	131	4	3.05344	1.50323	760|857|4780|5970	CA2|CAV1|NFE2L2|RELA	-4.05696	0	96	0	0	-7.78936	40.7037
GO Biological Processes	GO:0009746	response to hexose	19	-5.26964	M1	1	0	19_GO:0050896 response to stimulus	-5.26964	8.42146	7.27666	27994	203	131	8	6.10687	2.09214	836|2697|3091|3383|5467|5530|5743|5894	CASP3|GJA1|HIF1A|ICAM1|PPARD|PPP3CA|PTGS2|RAF1	-4.05686	0	81	0	0	-8.93589	10.9587
GO Biological Processes	GO:0034308	primary alcohol metabolic process	19	-5.26449	M1	1	0	19_GO:0008152 metabolic process	-5.26449	13.6401	8.41702	27994	94	131	6	4.58015	1.82652	125|231|1543|1544|1545|1576	ADH1B|AKR1B1|CYP1A1|CYP1A2|CYP1B1|CYP3A4	-4.0526	0	39	0	0	-14.9141	64.1084
GO Biological Processes	GO:1904894	positive regulation of STAT cascade	19	-5.26449	M1	1	0	19_GO:0048518 positive regulation of biological process	-5.26449	13.6401	8.41702	27994	94	131	6	4.58015	1.82652	231|1545|3458|3572|7124|7422	AKR1B1|CYP1B1|IFNG|IL6ST|TNF|VEGFA	-4.0526	0	77	0	0	-9.24192	27.7012
GO Biological Processes	GO:0031050	dsRNA processing	19	-5.26215	M1	1	0	19_GO:0008152 metabolic process	-5.26215	19.7865	9.47495	27994	54	131	5	3.81679	1.67403	1956|2099|5530|7124|7157	EGFR|ESR1|PPP3CA|TNF|TP53	-4.05161	0	99	0	0	-7.51638	61.0556
GO Biological Processes	GO:0032757	positive regulation of interleukin-8 production	19	-5.26215	M1	1	0	19_GO:0048518 positive regulation of biological process	-5.26215	19.7865	9.47495	27994	54	131	5	3.81679	1.67403	2152|3553|5054|5970|7124	F3|IL1B|SERPINE1|RELA|TNF	-4.05161	0	85	0	0	-8.78624	33.2414
GO Biological Processes	GO:0070918	production of small RNA involved in gene silencing by RNA	19	-5.26215	M1	1	0	19_GO:0048519 negative regulation of biological process	-5.26215	19.7865	9.47495	27994	54	131	5	3.81679	1.67403	1956|2099|5530|7124|7157	EGFR|ESR1|PPP3CA|TNF|TP53	-4.05161	0	99	0	0	-7.51638	61.0556
GO Biological Processes	GO:0002246	wound healing involved in inflammatory response	19	-5.25861	M1	1	0	19_GO:0050896 response to stimulus	-5.25861	80.1355	15.3494	27994	8	131	3	2.29008	1.30695	3091|3162|3552	HIF1A|HMOX1|IL1A	-4.04941	0	123	0	0	-6.22138	80.1355
GO Biological Processes	GO:0031620	regulation of fever generation	19	-5.25861	M1	1	0	19_GO:0032501 multicellular organismal process	-5.25861	80.1355	15.3494	27994	8	131	3	2.29008	1.30695	3553|5743|7124	IL1B|PTGS2|TNF	-4.04941	0	11	0	0	-26.7386	213.695
GO Biological Processes	GO:0033084	regulation of immature T cell proliferation in thymus	19	-5.25861	M1	1	0	19_GO:0008283 cell proliferation	-5.25861	80.1355	15.3494	27994	8	131	3	2.29008	1.30695	2064|3552|3553	ERBB2|IL1A|IL1B	-4.04941	0	98	0	0	-7.6909	91.5834
GO Biological Processes	GO:0008286	insulin receptor signaling pathway	19	-5.24803	M1	1	0	19_GO:0023052 signaling	-5.24803	10.3163	7.71203	27994	145	131	7	5.34351	1.96496	207|2932|3481|3553|3645|5579|5970	AKT1|GSK3B|IGF2|IL1B|INSRR|PRKCB|RELA	-4.03926	0	137	1	1	-5.24803	37.7108
GO Biological Processes	GO:0002768	immune response-regulating cell surface receptor signaling pathway	19	-5.24605	M1	1	0	19_GO:0002376 immune system process	-5.24605	4.98898	6.25866	27994	514	131	12	9.16031	2.52033	581|596|1147|2353|3551|3725|5530|5579|5594|5599|5894|5970	BAX|BCL2|CHUK|FOS|IKBKB|JUN|PPP3CA|PRKCB|MAPK1|MAPK8|RAF1|RELA	-4.03773	0	24	0	0	-19.0213	42.7389
GO Biological Processes	GO:0010466	negative regulation of peptidase activity	19	-5.24477	M1	1	0	19_GO:0048519 negative regulation of biological process	-5.24477	7.07078	6.89863	27994	272	131	9	6.87023	2.21001	207|1800|4318|5054|5743|5894|6590|7124|7422	AKT1|DPEP1|MMP9|SERPINE1|PTGS2|RAF1|SLPI|TNF|VEGFA	-4.0369	0	18	0	0	-21.0047	17.6445
GO Biological Processes	GO:0032602	chemokine production	19	-5.23781	M1	1	0	19_GO:0032501 multicellular organismal process	-5.23781	13.4965	8.3657	27994	95	131	6	4.58015	1.82652	2950|3091|3162|3458|3553|7124	GSTP1|HIF1A|HMOX1|IFNG|IL1B|TNF	-4.03083	0	11	0	0	-26.7386	213.695
GO Biological Processes	GO:1901888	regulation of cell junction assembly	19	-5.23781	M1	1	0	19_GO:0071840 cellular component organization or biogenesis	-5.23781	13.4965	8.3657	27994	95	131	6	4.58015	1.82652	857|2697|3551|3553|7124|7422	CAV1|GJA1|IKBKB|IL1B|TNF|VEGFA	-4.03083	0	111	0	0	-6.84834	53.4237
GO Biological Processes	GO:0051353	positive regulation of oxidoreductase activity	19	-5.22239	M1	1	0	19_GO:0048518 positive regulation of biological process	-5.22239	19.4268	9.37933	27994	55	131	5	3.81679	1.67403	207|3091|3458|3553|7124	AKT1|HIF1A|IFNG|IL1B|TNF	-4.01628	0	11	0	0	-26.7386	213.695
GO Biological Processes	GO:0070741	response to interleukin-6	19	-5.22239	M1	1	0	19_GO:0050896 response to stimulus	-5.22239	19.4268	9.37933	27994	55	131	5	3.81679	1.67403	1244|3383|3572|5970|6772	ABCC2|ICAM1|IL6ST|RELA|STAT1	-4.01628	0	133	0	0	-5.38641	20.9505
GO Biological Processes	GO:1904062	regulation of cation transmembrane transport	19	-5.21777	M1	1	0	19_GO:0051179 localization	-5.21777	6.12306	6.60359	27994	349	131	10	7.63359	2.31999	154|581|857|1812|2946|3458|3627|4318|6347|6373	ADRB2|BAX|CAV1|DRD1|GSTM2|IFNG|CXCL10|MMP9|CCL2|CXCL11	-4.01211	0	59	0	0	-11.5248	26.7118
GO Biological Processes	GO:0002690	positive regulation of leukocyte chemotaxis	19	-5.21144	M1	1	0	19_GO:0040011 locomotion	-5.21144	13.3559	8.31516	27994	96	131	6	4.58015	1.82652	2155|3576|3627|5054|5594|7422	F7|CXCL8|CXCL10|SERPINE1|MAPK1|VEGFA	-4.00622	0	42	0	0	-14.4051	14.5229
GO Biological Processes	GO:0007189	adenylate cyclase-activating G protein-coupled receptor signaling pathway	19	-5.20886	M1	1	0	19_GO:0023052 signaling	-5.20886	10.1759	7.64832	27994	147	131	7	5.34351	1.96496	152|153|154|1812|3627|5578|6373	ADRA2C|ADRB1|ADRB2|DRD1|CXCL10|PRKCA|CXCL11	-4.00408	0	127	0	0	-5.9193	30.5278
GO Biological Processes	GO:0046890	regulation of lipid biosynthetic process	19	-5.20744	M1	1	0	19_GO:0050789 regulation of biological process	-5.20744	8.25873	7.18739	27994	207	131	8	6.10687	2.09214	207|2194|2475|3458|3553|5743|6647|7124	AKT1|FASN|MTOR|IFNG|IL1B|PTGS2|SOD1|TNF	-4.0031	0	11	0	0	-26.7386	213.695
GO Biological Processes	GO:0035902	response to immobilization stress	19	-5.19921	M1	1	0	19_GO:0050896 response to stimulus	-5.19921	32.8761	11.1498	27994	26	131	4	3.05344	1.50323	1543|1544|2353|5468	CYP1A1|CYP1A2|FOS|PPARG	-3.99619	0	39	0	0	-14.9141	64.1084
GO Biological Processes	GO:0042730	fibrinolysis	19	-5.19921	M1	1	0	19_GO:0048519 negative regulation of biological process	-5.19921	32.8761	11.1498	27994	26	131	4	3.05344	1.50323	5054|5327|5328|7056	SERPINE1|PLAT|PLAU|THBD	-3.99619	0	46	0	0	-13.366	32.8761
GO Biological Processes	GO:0050926	regulation of positive chemotaxis	19	-5.19921	M1	1	0	19_GO:0040011 locomotion	-5.19921	32.8761	11.1498	27994	26	131	4	3.05344	1.50323	2152|2155|3576|7422	F3|F7|CXCL8|VEGFA	-3.99619	0	136	0	0	-5.27019	34.1911
GO Biological Processes	GO:0006575	cellular modified amino acid metabolic process	19	-5.1921	M1	1	0	19_GO:0008152 metabolic process	-5.1921	8.21903	7.16545	27994	208	131	8	6.10687	2.09214	1800|2944|2946|2950|4780|5321|6647|50506	DPEP1|GSTM1|GSTM2|GSTP1|NFE2L2|PLA2G4A|SOD1|DUOX2	-3.98951	0	105	0	0	-7.24668	94.9754
GO Biological Processes	GO:1900542	regulation of purine nucleotide metabolic process	19	-5.18949	M1	1	0	19_GO:0050789 regulation of biological process	-5.18949	10.1072	7.61693	27994	148	131	7	5.34351	1.96496	142|891|983|3091|3458|5465|7157	PARP1|CCNB1|CDK1|HIF1A|IFNG|PPARA|TP53	-3.98735	0	102	0	0	-7.42388	36.8439
GO Biological Processes	GO:0007589	body fluid secretion	19	-5.18537	M1	1	0	19_GO:0051179 localization	-5.18537	13.2182	8.26536	27994	97	131	6	4.58015	1.82652	595|857|3091|3099|7422|8648	CCND1|CAV1|HIF1A|HK2|VEGFA|NCOA1	-3.98454	0	109	0	0	-6.95489	26.1667
GO Biological Processes	GO:0042100	B cell proliferation	19	-5.18537	M1	1	0	19_GO:0008283 cell proliferation	-5.18537	13.2182	8.26536	27994	97	131	6	4.58015	1.82652	196|581|596|836|959|1026	AHR|BAX|BCL2|CASP3|CD40LG|CDKN1A	-3.98454	0	83	0	0	-8.8504	45.7917
GO Biological Processes	GO:1901184	regulation of ERBB signaling pathway	19	-5.18537	M1	1	0	19_GO:0023052 signaling	-5.18537	13.2182	8.26536	27994	97	131	6	4.58015	1.82652	207|1950|1956|2064|4318|653361	AKT1|EGF|EGFR|ERBB2|MMP9|NCF1	-3.98454	0	117	0	0	-6.34231	45.7917
GO Biological Processes	GO:0048010	vascular endothelial growth factor receptor signaling pathway	19	-5.15959	M1	1	0	19_GO:0023052 signaling	-5.15959	13.0833	8.21629	27994	98	131	6	4.58015	1.82652	3091|3315|3553|5579|7422|653361	HIF1A|HSPB1|IL1B|PRKCB|VEGFA|NCF1	-3.95963	0	137	0	0	-5.24803	37.7108
GO Biological Processes	GO:0050764	regulation of phagocytosis	19	-5.15959	M1	1	0	19_GO:0071840 cellular component organization or biogenesis	-5.15959	13.0833	8.21629	27994	98	131	6	4.58015	1.82652	3458|3553|5468|6347|6647|7124	IFNG|IL1B|PPARG|CCL2|SOD1|TNF	-3.95963	0	11	0	0	-26.7386	213.695
GO Biological Processes	GO:0045840	positive regulation of mitotic nuclear division	19	-5.14515	M1	1	0	19_GO:0048518 positive regulation of biological process	-5.14515	18.7451	9.19546	27994	57	131	5	3.81679	1.67403	1950|3481|3552|3553|5925	EGF|IGF2|IL1A|IL1B|RB1	-3.94562	0	98	0	0	-7.6909	91.5834
GO Biological Processes	GO:0030278	regulation of ossification	19	-5.13156	M1	1	0	19_GO:0032501 multicellular organismal process	-5.13156	8.06395	7.07913	27994	212	131	8	6.10687	2.09214	154|240|596|860|3091|3572|5594|7124	ADRB2|ALOX5|BCL2|RUNX2|HIF1A|IL6ST|MAPK1|TNF	-3.93466	0	138	1	1	-5.13156	9.17707
GO Biological Processes	GO:0001963	synaptic transmission, dopaminergic	19	-5.13115	M1	1	0	19_GO:0023052 signaling	-5.13115	31.6585	10.9284	27994	27	131	4	3.05344	1.50323	1812|5743|6530|6532	DRD1|PTGS2|SLC6A2|SLC6A4	-3.93466	0	139	1	1	-5.13115	40.0677
GO Biological Processes	GO:0009651	response to salt stress	19	-5.13115	M1	1	0	19_GO:0050896 response to stimulus	-5.13115	31.6585	10.9284	27994	27	131	4	3.05344	1.50323	231|581|7124|7157	AKR1B1|BAX|TNF|TP53	-3.93466	0	112	0	0	-6.7819	71.2316
GO Biological Processes	GO:0033081	regulation of T cell differentiation in thymus	19	-5.13115	M1	1	0	19_GO:0002376 immune system process	-5.13115	31.6585	10.9284	27994	27	131	4	3.05344	1.50323	2064|3552|3553|6647	ERBB2|IL1A|IL1B|SOD1	-3.93466	0	98	0	0	-7.6909	91.5834
GO Biological Processes	GO:0045672	positive regulation of osteoclast differentiation	19	-5.13115	M1	1	0	19_GO:0002376 immune system process	-5.13115	31.6585	10.9284	27994	27	131	4	3.05344	1.50323	760|2353|3458|7124	CA2|FOS|IFNG|TNF	-3.93466	0	30	0	0	-18.3881	31.6585
GO Biological Processes	GO:0046885	regulation of hormone biosynthetic process	19	-5.13115	M1	1	0	19_GO:0050789 regulation of biological process	-5.13115	31.6585	10.9284	27994	27	131	4	3.05344	1.50323	3091|3458|3553|7124	HIF1A|IFNG|IL1B|TNF	-3.93466	0	11	0	0	-26.7386	213.695
GO Biological Processes	GO:0048143	astrocyte activation	19	-5.13115	M1	1	0	19_GO:0032502 developmental process	-5.13115	31.6585	10.9284	27994	27	131	4	3.05344	1.50323	1956|3458|3553|7124	EGFR|IFNG|IL1B|TNF	-3.93466	0	11	0	0	-26.7386	213.695
GO Biological Processes	GO:0006140	regulation of nucleotide metabolic process	19	-5.11346	M1	1	0	19_GO:0050789 regulation of biological process	-5.11346	9.8412	7.49427	27994	152	131	7	5.34351	1.96496	142|891|983|3091|3458|5465|7157	PARP1|CCNB1|CDK1|HIF1A|IFNG|PPARA|TP53	-3.91741	0	102	0	0	-7.42388	36.8439
GO Biological Processes	GO:1903749	positive regulation of establishment of protein localization to mitochondrion	19	-5.10762	M1	1	0	19_GO:0048518 positive regulation of biological process	-5.10762	18.422	9.107	27994	58	131	5	3.81679	1.67403	596|841|1869|5599|7157	BCL2|CASP8|E2F1|MAPK8|TP53	-3.91199	0	53	0	0	-12.5473	42.7389
GO Biological Processes	GO:0007254	JNK cascade	19	-5.10177	M1	1	0	19_GO:0023052 signaling	-5.10177	7.98859	7.03682	27994	214	131	8	6.10687	2.09214	207|959|1956|2950|3553|5599|7124|653361	AKT1|CD40LG|EGFR|GSTP1|IL1B|MAPK8|TNF|NCF1	-3.907	0	35	0	0	-16.3031	20.6801
GO Biological Processes	GO:0016051	carbohydrate biosynthetic process	19	-5.10177	M1	1	0	19_GO:0008152 metabolic process	-5.10177	7.98859	7.03682	27994	214	131	8	6.10687	2.09214	207|231|1950|2475|2932|3037|3481|5465	AKT1|AKR1B1|EGF|MTOR|GSK3B|HAS2|IGF2|PPARA	-3.907	0	29	0	0	-18.4437	33.7413
GO Biological Processes	GO:0031589	cell-substrate adhesion	19	-5.10005	M1	1	0	19_GO:0022610 biological adhesion	-5.10005	5.93596	6.4632	27994	360	131	10	7.63359	2.31999	596|1277|1281|2932|3037|5054|5328|5467|7412|7422	BCL2|COL1A1|COL3A1|GSK3B|HAS2|SERPINE1|PLAU|PPARD|VCAM1|VEGFA	-3.90614	0	140	1	1	-5.10005	8.54779
GO Biological Processes	GO:0033044	regulation of chromosome organization	19	-5.10005	M1	1	0	19_GO:0071840 cellular component organization or biogenesis	-5.10005	5.93596	6.4632	27994	360	131	10	7.63359	2.31999	142|891|3481|3553|4609|5594|5599|5925|7157|7422	PARP1|CCNB1|IGF2|IL1B|MYC|MAPK1|MAPK8|RB1|TP53|VEGFA	-3.90614	0	79	0	0	-9.05318	142.463
GO Biological Processes	GO:0016202	regulation of striated muscle tissue development	19	-5.0948	M1	1	0	19_GO:0032502 developmental process	-5.0948	9.77688	7.46431	27994	153	131	7	5.34351	1.96496	596|891|983|2475|2697|5465|5594	BCL2|CCNB1|CDK1|MTOR|GJA1|PPARA|MAPK1	-3.90133	0	63	0	0	-11.069	71.2316
GO Biological Processes	GO:0033080	immature T cell proliferation in thymus	19	-5.08401	M1	1	0	19_GO:0008283 cell proliferation	-5.08401	71.2316	14.449	27994	9	131	3	2.29008	1.30695	2064|3552|3553	ERBB2|IL1A|IL1B	-3.89225	0	98	0	0	-7.6909	91.5834
GO Biological Processes	GO:0060556	regulation of vitamin D biosynthetic process	19	-5.08401	M1	1	0	19_GO:0050789 regulation of biological process	-5.08401	71.2316	14.449	27994	9	131	3	2.29008	1.30695	3458|3553|7124	IFNG|IL1B|TNF	-3.89225	0	11	0	0	-26.7386	213.695
GO Biological Processes	GO:0071550	death-inducing signaling complex assembly	19	-5.08401	M1	1	0	19_GO:0023052 signaling	-5.08401	71.2316	14.449	27994	9	131	3	2.29008	1.30695	841|5894|7124	CASP8|RAF1|TNF	-3.89225	0	112	0	0	-6.7819	71.2316
GO Biological Processes	GO:1901857	positive regulation of cellular respiration	19	-5.08401	M1	1	0	19_GO:0048518 positive regulation of biological process	-5.08401	71.2316	14.449	27994	9	131	3	2.29008	1.30695	891|983|3458	CCNB1|CDK1|IFNG	-3.89225	0	63	0	0	-11.069	71.2316
GO Biological Processes	GO:0008203	cholesterol metabolic process	19	-5.07628	M1	1	0	19_GO:0008152 metabolic process	-5.07628	9.71339	7.43463	27994	154	131	7	5.34351	1.96496	847|1544|1576|2194|5444|5467|6647	CAT|CYP1A2|CYP3A4|FASN|PON1|PPARD|SOD1	-3.88494	0	39	0	0	-14.9141	64.1084
GO Biological Processes	GO:0051701	interaction with host	19	-5.0723	M1	1	0	19_GO:0051704 multi-organism process	-5.0723	7.91462	6.99505	27994	216	131	8	6.10687	2.09214	598|841|857|983|1803|1956|3383|3576	BCL2L1|CASP8|CAV1|CDK1|DPP4|EGFR|ICAM1|CXCL8	-3.88139	0	134	0	0	-5.29498	8.6633
GO Biological Processes	GO:0033598	mammary gland epithelial cell proliferation	19	-5.06578	M1	1	0	19_GO:0008283 cell proliferation	-5.06578	30.5278	10.7187	27994	28	131	4	3.05344	1.50323	581|595|2099|5594	BAX|CCND1|ESR1|MAPK1	-3.87615	0	31	0	0	-18.0915	106.847
GO Biological Processes	GO:0045932	negative regulation of muscle contraction	19	-5.06578	M1	1	0	19_GO:0048519 negative regulation of biological process	-5.06578	30.5278	10.7187	27994	28	131	4	3.05344	1.50323	152|154|5743|6647	ADRA2C|ADRB2|PTGS2|SOD1	-3.87615	0	36	0	0	-16.0134	50.2811
GO Biological Processes	GO:0071880	adenylate cyclase-activating adrenergic receptor signaling pathway	19	-5.06578	M1	1	0	19_GO:0023052 signaling	-5.06578	30.5278	10.7187	27994	28	131	4	3.05344	1.50323	152|153|154|1812	ADRA2C|ADRB1|ADRB2|DRD1	-3.87615	0	127	0	0	-5.9193	30.5278
GO Biological Processes	GO:0000079	regulation of cyclin-dependent protein serine/threonine kinase activity	19	-5.05927	M1	1	0	19_GO:0050789 regulation of biological process	-5.05927	12.5703	8.02695	27994	102	131	6	4.58015	1.82652	207|595|836|891|1026|1956	AKT1|CCND1|CASP3|CCNB1|CDKN1A|EGFR	-3.87176	0	92	0	0	-8.02954	106.847
GO Biological Processes	GO:0043502	regulation of muscle adaptation	19	-5.05927	M1	1	0	19_GO:0032501 multicellular organismal process	-5.05927	12.5703	8.02695	27994	102	131	6	4.58015	1.82652	142|2475|3572|5465|5530|5578	PARP1|MTOR|IL6ST|PPARA|PPP3CA|PRKCA	-3.87176	0	61	0	0	-11.228	26.7118
GO Biological Processes	GO:0044264	cellular polysaccharide metabolic process	19	-5.05927	M1	1	0	19_GO:0008152 metabolic process	-5.05927	12.5703	8.02695	27994	102	131	6	4.58015	1.82652	207|2475|2932|3037|3481|3572	AKT1|MTOR|GSK3B|HAS2|IGF2|IL6ST	-3.87176	0	29	0	0	-18.4437	33.7413
GO Biological Processes	GO:0055024	regulation of cardiac muscle tissue development	19	-5.05927	M1	1	0	19_GO:0032502 developmental process	-5.05927	12.5703	8.02695	27994	102	131	6	4.58015	1.82652	891|983|2475|2697|5465|5594	CCNB1|CDK1|MTOR|GJA1|PPARA|MAPK1	-3.87176	0	63	0	0	-11.069	71.2316
GO Biological Processes	GO:1903076	regulation of protein localization to plasma membrane	19	-5.05927	M1	1	0	19_GO:0051179 localization	-5.05927	12.5703	8.02695	27994	102	131	6	4.58015	1.82652	207|367|598|1956|3458|7124	AKT1|AR|BCL2L1|EGFR|IFNG|TNF	-3.87176	0	11	0	0	-26.7386	213.695
GO Biological Processes	GO:1901861	regulation of muscle tissue development	19	-5.03963	M1	1	0	19_GO:0032502 developmental process	-5.03963	9.58886	7.37608	27994	156	131	7	5.34351	1.96496	596|891|983|2475|2697|5465|5594	BCL2|CCNB1|CDK1|MTOR|GJA1|PPARA|MAPK1	-3.85254	0	63	0	0	-11.069	71.2316
GO Biological Processes	GO:0070498	interleukin-1-mediated signaling pathway	19	-5.03486	M1	1	0	19_GO:0023052 signaling	-5.03486	12.4482	7.98126	27994	103	131	6	4.58015	1.82652	1147|3551|3552|3553|4792|5970	CHUK|IKBKB|IL1A|IL1B|NFKBIA|RELA	-3.8488	0	7	0	0	-30.6555	19.8339
GO Biological Processes	GO:0050994	regulation of lipid catabolic process	19	-5.03462	M1	1	0	19_GO:0050789 regulation of biological process	-5.03462	17.8079	8.93652	27994	60	131	5	3.81679	1.67403	207|2475|3553|5465|7124	AKT1|MTOR|IL1B|PPARA|TNF	-3.8488	0	104	0	0	-7.26254	29.1402
GO Biological Processes	GO:0061900	glial cell activation	19	-5.03462	M1	1	0	19_GO:0050896 response to stimulus	-5.03462	17.8079	8.93652	27994	60	131	5	3.81679	1.67403	1956|3458|3553|3725|7124	EGFR|IFNG|IL1B|JUN|TNF	-3.8488	0	11	0	0	-26.7386	213.695
GO Biological Processes	GO:0000187	activation of MAPK activity	19	-5.0215	M1	1	0	19_GO:0048518 positive regulation of biological process	-5.0215	9.52779	7.34719	27994	157	131	7	5.34351	1.96496	959|983|1950|3553|5594|6647|7124	CD40LG|CDK1|EGF|IL1B|MAPK1|SOD1|TNF	-3.83694	0	35	0	0	-16.3031	20.6801
GO Biological Processes	GO:0048634	regulation of muscle organ development	19	-5.0215	M1	1	0	19_GO:0032502 developmental process	-5.0215	9.52779	7.34719	27994	157	131	7	5.34351	1.96496	596|891|983|2475|2697|5465|5594	BCL2|CCNB1|CDK1|MTOR|GJA1|PPARA|MAPK1	-3.83694	0	63	0	0	-11.069	71.2316
GO Biological Processes	GO:1902652	secondary alcohol metabolic process	19	-5.0215	M1	1	0	19_GO:0008152 metabolic process	-5.0215	9.52779	7.34719	27994	157	131	7	5.34351	1.96496	847|1544|1576|2194|5444|5467|6647	CAT|CYP1A2|CYP3A4|FASN|PON1|PPARD|SOD1	-3.83694	0	39	0	0	-14.9141	64.1084
GO Biological Processes	GO:0003300	cardiac muscle hypertrophy	19	-5.01071	M1	1	0	19_GO:0032501 multicellular organismal process	-5.01071	12.3285	7.9362	27994	104	131	6	4.58015	1.82652	142|2475|3572|5465|5530|5578	PARP1|MTOR|IL6ST|PPARA|PPP3CA|PRKCA	-3.82658	0	61	0	0	-11.228	26.7118
GO Biological Processes	GO:0060402	calcium ion transport into cytosol	19	-5.0035	M1	1	0	19_GO:0051179 localization	-5.0035	9.46748	7.31857	27994	158	131	7	5.34351	1.96496	581|596|857|1812|2946|3627|6373	BAX|BCL2|CAV1|DRD1|GSTM2|CXCL10|CXCL11	-3.8202	0	59	0	0	-11.5248	26.7118
GO Biological Processes	GO:0060968	regulation of gene silencing	19	-5.0035	M1	1	0	19_GO:0048519 negative regulation of biological process	-5.0035	9.46748	7.31857	27994	158	131	7	5.34351	1.96496	1017|1956|2099|5468|5530|7124|7157	CDK2|EGFR|ESR1|PPARG|PPP3CA|TNF|TP53	-3.8202	0	99	0	0	-7.51638	61.0556
GO Biological Processes	GO:0001782	B cell homeostasis	19	-5.00289	M1	1	0	19_GO:0002376 immune system process	-5.00289	29.4751	10.5197	27994	29	131	4	3.05344	1.50323	581|596|836|3091	BAX|BCL2|CASP3|HIF1A	-3.82002	0	95	0	0	-7.88155	37.7108
GO Biological Processes	GO:0032722	positive regulation of chemokine production	19	-4.99911	M1	1	0	19_GO:0048518 positive regulation of biological process	-4.99911	17.516	8.85434	27994	61	131	5	3.81679	1.67403	3091|3162|3458|3553|7124	HIF1A|HMOX1|IFNG|IL1B|TNF	-3.81665	0	11	0	0	-26.7386	213.695
GO Biological Processes	GO:0035051	cardiocyte differentiation	19	-4.98562	M1	1	0	19_GO:0032502 developmental process	-4.98562	9.40794	7.29019	27994	159	131	7	5.34351	1.96496	891|983|1956|2475|5465|5594|7422	CCNB1|CDK1|EGFR|MTOR|PPARA|MAPK1|VEGFA	-3.80358	0	63	0	0	-11.069	71.2316
GO Biological Processes	GO:0010803	regulation of tumor necrosis factor-mediated signaling pathway	19	-4.96422	M1	1	0	19_GO:0023052 signaling	-4.96422	17.2334	8.77408	27994	62	131	5	3.81679	1.67403	841|1147|2950|3551|7124	CASP8|CHUK|GSTP1|IKBKB|TNF	-3.78259	0	24	0	0	-19.0213	42.7389
GO Biological Processes	GO:1904029	regulation of cyclin-dependent protein kinase activity	19	-4.96317	M1	1	0	19_GO:0050789 regulation of biological process	-4.96317	12.0959	7.84791	27994	106	131	6	4.58015	1.82652	207|595|836|891|1026|1956	AKT1|CCND1|CASP3|CCNB1|CDKN1A|EGFR	-3.78196	0	92	0	0	-8.02954	106.847
GO Biological Processes	GO:0019935	cyclic-nucleotide-mediated signaling	19	-4.95742	M1	1	0	19_GO:0023052 signaling	-4.95742	7.63195	6.8332	27994	224	131	8	6.10687	2.09214	152|153|154|196|1812|3627|5578|6373	ADRA2C|ADRB1|ADRB2|AHR|DRD1|CXCL10|PRKCA|CXCL11	-3.77663	0	127	0	0	-5.9193	30.5278
GO Biological Processes	GO:0051047	positive regulation of secretion	19	-4.9562	M1	1	0	19_GO:0048518 positive regulation of biological process	-4.9562	5.71376	6.29271	27994	374	131	10	7.63359	2.31999	1956|2697|3091|3458|3552|3553|5467|6532|6696|7124	EGFR|GJA1|HIF1A|IFNG|IL1A|IL1B|PPARD|SLC6A4|SPP1|TNF	-3.77583	0	40	0	0	-14.7066	12.987
GO Biological Processes	GO:0045088	regulation of innate immune response	19	-4.95472	M1	1	0	19_GO:0002376 immune system process	-4.95472	5.12122	6.10431	27994	459	131	11	8.39695	2.42315	841|857|1147|2099|3458|3551|4792|5468|5894|5970|6772	CASP8|CAV1|CHUK|ESR1|IFNG|IKBKB|NFKBIA|PPARG|RAF1|RELA|STAT1	-3.77477	0	24	0	0	-19.0213	42.7389
GO Biological Processes	GO:0002275	myeloid cell activation involved in immune response	19	-4.94338	M1	1	0	19_GO:0002376 immune system process	-4.94338	4.65397	5.93979	27994	551	131	12	9.16031	2.52033	240|847|1509|2950|3162|3458|4048|4318|4353|5328|5594|6590	ALOX5|CAT|CTSD|GSTP1|HMOX1|IFNG|LTA4H|MMP9|MPO|PLAU|MAPK1|SLPI	-3.76527	0	80	0	0	-8.9986	5.35576
GO Biological Processes	GO:0001516	prostaglandin biosynthetic process	19	-4.94232	M1	1	0	19_GO:0008152 metabolic process	-4.94232	28.4926	10.3306	27994	30	131	4	3.05344	1.50323	3553|5321|5742|5743	IL1B|PLA2G4A|PTGS1|PTGS2	-3.76527	0	32	0	0	-17.2246	56.5662
GO Biological Processes	GO:0005979	regulation of glycogen biosynthetic process	19	-4.94232	M1	1	0	19_GO:0050789 regulation of biological process	-4.94232	28.4926	10.3306	27994	30	131	4	3.05344	1.50323	207|2475|2932|3481	AKT1|MTOR|GSK3B|IGF2	-3.76527	0	29	0	0	-18.4437	33.7413
GO Biological Processes	GO:0010962	regulation of glucan biosynthetic process	19	-4.94232	M1	1	0	19_GO:0050789 regulation of biological process	-4.94232	28.4926	10.3306	27994	30	131	4	3.05344	1.50323	207|2475|2932|3481	AKT1|MTOR|GSK3B|IGF2	-3.76527	0	29	0	0	-18.4437	33.7413
GO Biological Processes	GO:0043457	regulation of cellular respiration	19	-4.94232	M1	1	0	19_GO:0050789 regulation of biological process	-4.94232	28.4926	10.3306	27994	30	131	4	3.05344	1.50323	891|983|3091|3458	CCNB1|CDK1|HIF1A|IFNG	-3.76527	0	63	0	0	-11.069	71.2316
GO Biological Processes	GO:0046457	prostanoid biosynthetic process	19	-4.94232	M1	1	0	19_GO:0008152 metabolic process	-4.94232	28.4926	10.3306	27994	30	131	4	3.05344	1.50323	3553|5321|5742|5743	IL1B|PLA2G4A|PTGS1|PTGS2	-3.76527	0	32	0	0	-17.2246	56.5662
GO Biological Processes	GO:0060055	angiogenesis involved in wound healing	19	-4.94232	M1	1	0	19_GO:0032502 developmental process	-4.94232	28.4926	10.3306	27994	30	131	4	3.05344	1.50323	240|5054|7124|7422	ALOX5|SERPINE1|TNF|VEGFA	-3.76527	0	131	0	0	-5.58891	91.5834
GO Biological Processes	GO:0014897	striated muscle hypertrophy	19	-4.93976	M1	1	0	19_GO:0032501 multicellular organismal process	-4.93976	11.9829	7.80465	27994	107	131	6	4.58015	1.82652	142|2475|3572|5465|5530|5578	PARP1|MTOR|IL6ST|PPARA|PPP3CA|PRKCA	-3.76394	0	61	0	0	-11.228	26.7118
GO Biological Processes	GO:0032611	interleukin-1 beta production	19	-4.93976	M1	1	0	19_GO:0032501 multicellular organismal process	-4.93976	11.9829	7.80465	27994	107	131	6	4.58015	1.82652	841|2950|3315|3458|3553|7124	CASP8|GSTP1|HSPB1|IFNG|IL1B|TNF	-3.76394	0	11	0	0	-26.7386	213.695
GO Biological Processes	GO:0055017	cardiac muscle tissue growth	19	-4.93976	M1	1	0	19_GO:0040007 growth	-4.93976	11.9829	7.80465	27994	107	131	6	4.58015	1.82652	891|983|2475|2697|5465|5594	CCNB1|CDK1|MTOR|GJA1|PPARA|MAPK1	-3.76394	0	63	0	0	-11.069	71.2316
GO Biological Processes	GO:0010887	negative regulation of cholesterol storage	19	-4.9306	M1	1	0	19_GO:0048519 negative regulation of biological process	-4.9306	64.1084	13.6861	27994	10	131	3	2.29008	1.30695	5465|5467|5468	PPARA|PPARD|PPARG	-3.75699	0	73	0	0	-9.68214	64.1084
GO Biological Processes	GO:0032025	response to cobalt ion	19	-4.9306	M1	1	0	19_GO:0050896 response to stimulus	-4.9306	64.1084	13.6861	27994	10	131	3	2.29008	1.30695	836|841|842	CASP3|CASP8|CASP9	-3.75699	0	69	0	0	-10.3446	85.4779
GO Biological Processes	GO:0033083	regulation of immature T cell proliferation	19	-4.9306	M1	1	0	19_GO:0008283 cell proliferation	-4.9306	64.1084	13.6861	27994	10	131	3	2.29008	1.30695	2064|3552|3553	ERBB2|IL1A|IL1B	-3.75699	0	98	0	0	-7.6909	91.5834
GO Biological Processes	GO:0071394	cellular response to testosterone stimulus	19	-4.9306	M1	1	0	19_GO:0050896 response to stimulus	-4.9306	64.1084	13.6861	27994	10	131	3	2.29008	1.30695	367|2002|6696	AR|ELK1|SPP1	-3.75699	0	141	1	1	-4.9306	64.1084
GO Biological Processes	GO:0097267	omega-hydroxylase P450 pathway	19	-4.9306	M1	1	0	19_GO:0008152 metabolic process	-4.9306	64.1084	13.6861	27994	10	131	3	2.29008	1.30695	1543|1544|1545	CYP1A1|CYP1A2|CYP1B1	-3.75699	0	39	0	0	-14.9141	64.1084
GO Biological Processes	GO:0032507	maintenance of protein location in cell	19	-4.92993	M1	1	0	19_GO:0051179 localization	-4.92993	16.9599	8.69568	27994	63	131	5	3.81679	1.67403	207|857|2697|3099|3309	AKT1|CAV1|GJA1|HK2|HSPA5	-3.75699	0	119	0	0	-6.28519	31.4257
GO Biological Processes	GO:0046622	positive regulation of organ growth	19	-4.92993	M1	1	0	19_GO:0040007 growth	-4.92993	16.9599	8.69568	27994	63	131	5	3.81679	1.67403	207|891|983|2475|5594	AKT1|CCNB1|CDK1|MTOR|MAPK1	-3.75699	0	63	0	0	-11.069	71.2316
GO Biological Processes	GO:0032388	positive regulation of intracellular transport	19	-4.91554	M1	1	0	19_GO:0048518 positive regulation of biological process	-4.91554	7.53109	6.77455	27994	227	131	8	6.10687	2.09214	983|2064|2932|3458|3553|5594|5743|7157	CDK1|ERBB2|GSK3B|IFNG|IL1B|MAPK1|PTGS2|TP53	-3.74323	0	72	0	0	-9.79486	22.6646
GO Biological Processes	GO:0031214	biomineral tissue development	19	-4.91535	M1	1	0	19_GO:0032502 developmental process	-4.91535	9.17707	7.17916	27994	163	131	7	5.34351	1.96496	154|240|1277|3091|5465|5743|6696	ADRB2|ALOX5|COL1A1|HIF1A|PPARA|PTGS2|SPP1	-3.74323	0	138	0	0	-5.13156	9.17707
GO Biological Processes	GO:0000904	cell morphogenesis involved in differentiation	19	-4.9077	M1	1	0	19_GO:0032502 developmental process	-4.9077	3.97307	5.67072	27994	753	131	14	10.687	2.69929	367|596|836|842|2064|2932|3037|5530|5578|5594|5925|6647|6696|7422	AR|BCL2|CASP3|CASP9|ERBB2|GSK3B|HAS2|PPP3CA|PRKCA|MAPK1|RB1|SOD1|SPP1|VEGFA	-3.73599	0	128	0	0	-5.73225	8.11499
GO Biological Processes	GO:0006959	humoral immune response	19	-4.90636	M1	1	0	19_GO:0002376 immune system process	-4.90636	5.63838	6.2339	27994	379	131	10	7.63359	2.31999	240|596|3458|3553|3576|3627|6347|6373|6590|7124	ALOX5|BCL2|IFNG|IL1B|CXCL8|CXCL10|CCL2|CXCL11|SLPI|TNF	-3.73505	0	110	0	0	-6.91598	8.54779
GO Biological Processes	GO:0046165	alcohol biosynthetic process	19	-4.89809	M1	1	0	19_GO:0008152 metabolic process	-4.89809	9.12111	7.152	27994	164	131	7	5.34351	1.96496	231|1576|2194|3458|3553|6647|7124	AKR1B1|CYP3A4|FASN|IFNG|IL1B|SOD1|TNF	-3.72719	0	11	0	0	-26.7386	213.695
GO Biological Processes	GO:0045453	bone resorption	19	-4.89623	M1	1	0	19_GO:0032501 multicellular organismal process	-4.89623	16.6949	8.61905	27994	64	131	5	3.81679	1.67403	154|760|1956|5578|6696	ADRB2|CA2|EGFR|PRKCA|SPP1	-3.72573	0	45	0	0	-13.7627	44.9883
GO Biological Processes	GO:0014896	muscle hypertrophy	19	-4.89366	M1	1	0	19_GO:0032501 multicellular organismal process	-4.89366	11.763	7.71984	27994	109	131	6	4.58015	1.82652	142|2475|3572|5465|5530|5578	PARP1|MTOR|IL6ST|PPARA|PPP3CA|PRKCA	-3.72358	0	61	0	0	-11.228	26.7118
GO Biological Processes	GO:0007162	negative regulation of cell adhesion	19	-4.8925	M1	1	0	19_GO:0022610 biological adhesion	-4.8925	6.38954	6.44609	27994	301	131	9	6.87023	2.21001	207|836|1277|1545|2064|3559|5054|5465|7422	AKT1|CASP3|COL1A1|CYP1B1|ERBB2|IL2RA|SERPINE1|PPARA|VEGFA	-3.72282	0	142	1	1	-4.8925	14.9089
GO Biological Processes	GO:0002675	positive regulation of acute inflammatory response	19	-4.8839	M1	1	0	19_GO:0048518 positive regulation of biological process	-4.8839	27.5735	10.1504	27994	31	131	4	3.05344	1.50323	3553|3572|5743|7124	IL1B|IL6ST|PTGS2|TNF	-3.71503	0	11	0	0	-26.7386	213.695
GO Biological Processes	GO:0045737	positive regulation of cyclin-dependent protein serine/threonine kinase activity	19	-4.8839	M1	1	0	19_GO:0048518 positive regulation of biological process	-4.8839	27.5735	10.1504	27994	31	131	4	3.05344	1.50323	207|595|891|1956	AKT1|CCND1|CCNB1|EGFR	-3.71503	0	92	0	0	-8.02954	106.847
GO Biological Processes	GO:0006820	anion transport	19	-4.87923	M1	1	0	19_GO:0051179 localization	-4.87923	4.2348	5.74861	27994	656	131	13	9.92366	2.6122	207|760|1244|2475|2697|3553|5321|5465|5467|5468|8648|9429|10499	AKT1|CA2|ABCC2|MTOR|GJA1|IL1B|PLA2G4A|PPARA|PPARD|PPARG|NCOA1|ABCG2|NCOA2	-3.71077	0	93	0	0	-8.02334	14.8105
GO Biological Processes	GO:0070265	necrotic cell death	19	-4.86309	M1	1	0	19_GO:0009987 cellular process	-4.86309	16.4381	8.54413	27994	65	131	5	3.81679	1.67403	581|841|857|7124|7157	BAX|CASP8|CAV1|TNF|TP53	-3.69503	0	112	0	0	-6.7819	71.2316
GO Biological Processes	GO:0034440	lipid oxidation	19	-4.84848	M1	1	0	19_GO:0008152 metabolic process	-4.84848	11.5511	7.6372	27994	111	131	6	4.58015	1.82652	207|240|2475|5465|5467|5468	AKT1|ALOX5|MTOR|PPARA|PPARD|PPARG	-3.68083	0	73	0	0	-9.68214	64.1084
GO Biological Processes	GO:0007188	adenylate cyclase-modulating G protein-coupled receptor signaling pathway	19	-4.83365	M1	1	0	19_GO:0023052 signaling	-4.83365	7.33716	6.66041	27994	233	131	8	6.10687	2.09214	152|153|154|1129|1812|3627|5578|6373	ADRA2C|ADRB1|ADRB2|CHRM2|DRD1|CXCL10|PRKCA|CXCL11	-3.6664	0	127	0	0	-5.9193	30.5278
GO Biological Processes	GO:0008210	estrogen metabolic process	19	-4.82748	M1	1	0	19_GO:0008152 metabolic process	-4.82748	26.7118	9.97862	27994	32	131	4	3.05344	1.50323	1543|1544|1545|1576	CYP1A1|CYP1A2|CYP1B1|CYP3A4	-3.66265	0	39	0	0	-14.9141	64.1084
GO Biological Processes	GO:0038128	ERBB2 signaling pathway	19	-4.82748	M1	1	0	19_GO:0023052 signaling	-4.82748	26.7118	9.97862	27994	32	131	4	3.05344	1.50323	1950|1956|2064|5578	EGF|EGFR|ERBB2|PRKCA	-3.66265	0	117	0	0	-6.34231	45.7917
GO Biological Processes	GO:0046320	regulation of fatty acid oxidation	19	-4.82748	M1	1	0	19_GO:0050789 regulation of biological process	-4.82748	26.7118	9.97862	27994	32	131	4	3.05344	1.50323	207|2475|5465|5468	AKT1|MTOR|PPARA|PPARG	-3.66265	0	73	0	0	-9.68214	64.1084
GO Biological Processes	GO:0051385	response to mineralocorticoid	19	-4.82748	M1	1	0	19_GO:0050896 response to stimulus	-4.82748	26.7118	9.97862	27994	32	131	4	3.05344	1.50323	142|595|1026|2353	PARP1|CCND1|CDKN1A|FOS	-3.66265	0	116	0	0	-6.42237	33.3898
GO Biological Processes	GO:0051968	positive regulation of synaptic transmission, glutamatergic	19	-4.82748	M1	1	0	19_GO:0048518 positive regulation of biological process	-4.82748	26.7118	9.97862	27994	32	131	4	3.05344	1.50323	1812|1956|5743|6347	DRD1|EGFR|PTGS2|CCL2	-3.66265	0	74	0	0	-9.55493	26.7118
GO Biological Processes	GO:0071875	adrenergic receptor signaling pathway	19	-4.82748	M1	1	0	19_GO:0023052 signaling	-4.82748	26.7118	9.97862	27994	32	131	4	3.05344	1.50323	152|153|154|1812	ADRA2C|ADRB1|ADRB2|DRD1	-3.66265	0	127	0	0	-5.9193	30.5278
GO Biological Processes	GO:0006275	regulation of DNA replication	19	-4.82623	M1	1	0	19_GO:0050789 regulation of biological process	-4.82623	11.4479	7.59668	27994	112	131	6	4.58015	1.82652	983|1017|1950|1956|3725|7157	CDK1|CDK2|EGF|EGFR|JUN|TP53	-3.6618	0	50	0	0	-12.7295	29.3306
GO Biological Processes	GO:0055002	striated muscle cell development	19	-4.81349	M1	1	0	19_GO:0032502 developmental process	-4.81349	8.85126	7.01959	27994	169	131	7	5.34351	1.96496	596|891|983|2475|5465|5530|7422	BCL2|CCNB1|CDK1|MTOR|PPARA|PPP3CA|VEGFA	-3.64946	0	63	0	0	-11.069	71.2316
GO Biological Processes	GO:2000278	regulation of DNA biosynthetic process	19	-4.80419	M1	1	0	19_GO:0050789 regulation of biological process	-4.80419	11.3466	7.55666	27994	113	131	6	4.58015	1.82652	1026|2697|4609|5468|5594|7157	CDKN1A|GJA1|MYC|PPARG|MAPK1|TP53	-3.64056	0	115	0	0	-6.56929	35.6158
GO Biological Processes	GO:0006879	cellular iron ion homeostasis	19	-4.79844	M1	1	0	19_GO:0065007 biological regulation	-4.79844	15.9474	8.39917	27994	67	131	5	3.81679	1.67403	3091|3162|4609|6647|9429	HIF1A|HMOX1|MYC|SOD1|ABCG2	-3.63641	0	123	0	0	-6.22138	80.1355
GO Biological Processes	GO:0042035	regulation of cytokine biosynthetic process	19	-4.79844	M1	1	0	19_GO:0032501 multicellular organismal process	-4.79844	15.9474	8.39917	27994	67	131	5	3.81679	1.67403	3162|3315|3458|3553|7124	HMOX1|HSPB1|IFNG|IL1B|TNF	-3.63641	0	11	0	0	-26.7386	213.695
GO Biological Processes	GO:0045670	regulation of osteoclast differentiation	19	-4.79844	M1	1	0	19_GO:0002376 immune system process	-4.79844	15.9474	8.39917	27994	67	131	5	3.81679	1.67403	760|2353|2475|3458|7124	CA2|FOS|MTOR|IFNG|TNF	-3.63641	0	30	0	0	-18.3881	31.6585
GO Biological Processes	GO:0050918	positive chemotaxis	19	-4.79844	M1	1	0	19_GO:0040011 locomotion	-4.79844	15.9474	8.39917	27994	67	131	5	3.81679	1.67403	2152|2155|3576|3627|7422	F3|F7|CXCL8|CXCL10|VEGFA	-3.63641	0	136	0	0	-5.27019	34.1911
GO Biological Processes	GO:0031652	positive regulation of heat generation	19	-4.79379	M1	1	0	19_GO:0048518 positive regulation of biological process	-4.79379	58.2804	13.0287	27994	11	131	3	2.29008	1.30695	3553|5743|7124	IL1B|PTGS2|TNF	-3.63335	0	11	0	0	-26.7386	213.695
GO Biological Processes	GO:0033079	immature T cell proliferation	19	-4.79379	M1	1	0	19_GO:0008283 cell proliferation	-4.79379	58.2804	13.0287	27994	11	131	3	2.29008	1.30695	2064|3552|3553	ERBB2|IL1A|IL1B	-3.63335	0	98	0	0	-7.6909	91.5834
GO Biological Processes	GO:0033483	gas homeostasis	19	-4.79379	M1	1	0	19_GO:0065007 biological regulation	-4.79379	58.2804	13.0287	27994	11	131	3	2.29008	1.30695	857|2950|3091	CAV1|GSTP1|HIF1A	-3.63335	0	143	1	1	-4.79379	58.2804
GO Biological Processes	GO:0043619	regulation of transcription from RNA polymerase II promoter in response to oxidative stress	19	-4.79379	M1	1	0	19_GO:0050896 response to stimulus	-4.79379	58.2804	13.0287	27994	11	131	3	2.29008	1.30695	3091|3162|4780	HIF1A|HMOX1|NFE2L2	-3.63335	0	123	0	0	-6.22138	80.1355
GO Biological Processes	GO:0051302	regulation of cell division	19	-4.78043	M1	1	0	19_GO:0050789 regulation of biological process	-4.78043	8.74773	6.96815	27994	171	131	7	5.34351	1.96496	598|847|3481|3552|3553|4609|7422	BCL2L1|CAT|IGF2|IL1A|IL1B|MYC|VEGFA	-3.62039	0	98	0	0	-7.6909	91.5834
GO Biological Processes	GO:0001975	response to amphetamine	19	-4.77294	M1	1	0	19_GO:0050896 response to stimulus	-4.77294	25.9024	9.81449	27994	33	131	4	3.05344	1.50323	1812|3383|5530|6647	DRD1|ICAM1|PPP3CA|SOD1	-3.61369	0	90	0	0	-8.26865	28.2238
GO Biological Processes	GO:1902003	regulation of amyloid-beta formation	19	-4.77294	M1	1	0	19_GO:0050789 regulation of biological process	-4.77294	25.9024	9.81449	27994	33	131	4	3.05344	1.50323	836|3458|5970|7124	CASP3|IFNG|RELA|TNF	-3.61369	0	11	0	0	-26.7386	213.695
GO Biological Processes	GO:0070372	regulation of ERK1 and ERK2 cascade	19	-4.76905	M1	1	0	19_GO:0023052 signaling	-4.76905	6.16427	6.28976	27994	312	131	9	6.87023	2.21001	1956|2064|2950|3383|3553|3725|5578|6347|7124	EGFR|ERBB2|GSTP1|ICAM1|IL1B|JUN|PRKCA|CCL2|TNF	-3.61021	0	94	0	0	-7.93374	25.3536
GO Biological Processes	GO:0040014	regulation of multicellular organism growth	19	-4.7669	M1	1	0	19_GO:0040007 growth	-4.7669	15.7128	8.329	27994	68	131	5	3.81679	1.67403	153|154|596|3481|6647	ADRB1|ADRB2|BCL2|IGF2|SOD1	-3.60924	0	120	0	0	-6.25289	17.4445
GO Biological Processes	GO:0045123	cellular extravasation	19	-4.7669	M1	1	0	19_GO:0040011 locomotion	-4.7669	15.7128	8.329	27994	68	131	5	3.81679	1.67403	3383|6347|6401|7124|7412	ICAM1|CCL2|SELE|TNF|VCAM1	-3.60924	0	106	0	0	-7.18474	46.4554
GO Biological Processes	GO:0071479	cellular response to ionizing radiation	19	-4.7669	M1	1	0	19_GO:0050896 response to stimulus	-4.7669	15.7128	8.329	27994	68	131	5	3.81679	1.67403	598|1026|2002|3309|7157	BCL2L1|CDKN1A|ELK1|HSPA5|TP53	-3.60924	0	19	0	0	-20.3862	38.1598
GO Biological Processes	GO:0060419	heart growth	19	-4.76075	M1	1	0	19_GO:0040007 growth	-4.76075	11.1493	7.47812	27994	115	131	6	4.58015	1.82652	891|983|2475|2697|5465|5594	CCNB1|CDK1|MTOR|GJA1|PPARA|MAPK1	-3.60348	0	63	0	0	-11.069	71.2316
GO Biological Processes	GO:0033157	regulation of intracellular protein transport	19	-4.75412	M1	1	0	19_GO:0051179 localization	-4.75412	7.15296	6.55026	27994	239	131	8	6.10687	2.09214	983|2064|2932|3458|3553|5594|5743|7157	CDK1|ERBB2|GSK3B|IFNG|IL1B|MAPK1|PTGS2|TP53	-3.59725	0	72	0	0	-9.79486	22.6646
GO Biological Processes	GO:0006937	regulation of muscle contraction	19	-4.7478	M1	1	0	19_GO:0032501 multicellular organismal process	-4.7478	8.6466	6.91754	27994	173	131	7	5.34351	1.96496	152|154|857|1129|2946|5743|6647	ADRA2C|ADRB2|CAV1|CHRM2|GSTM2|PTGS2|SOD1	-3.59172	0	36	0	0	-16.0134	50.2811
GO Biological Processes	GO:0060401	cytosolic calcium ion transport	19	-4.7478	M1	1	0	19_GO:0051179 localization	-4.7478	8.6466	6.91754	27994	173	131	7	5.34351	1.96496	581|596|857|1812|2946|3627|6373	BAX|BCL2|CAV1|DRD1|GSTM2|CXCL10|CXCL11	-3.59172	0	59	0	0	-11.5248	26.7118
GO Biological Processes	GO:0060964	regulation of gene silencing by miRNA	19	-4.73934	M1	1	0	19_GO:0048519 negative regulation of biological process	-4.73934	11.0532	7.43957	27994	116	131	6	4.58015	1.82652	1956|2099|5468|5530|7124|7157	EGFR|ESR1|PPARG|PPP3CA|TNF|TP53	-3.58365	0	99	0	0	-7.51638	61.0556
GO Biological Processes	GO:0032370	positive regulation of lipid transport	19	-4.73585	M1	1	0	19_GO:0048518 positive regulation of biological process	-4.73585	15.4851	8.26031	27994	69	131	5	3.81679	1.67403	857|3553|4792|5444|6696	CAV1|IL1B|NFKBIA|PON1|SPP1	-3.58056	0	75	0	0	-9.34547	32.0542
GO Biological Processes	GO:0038093	Fc receptor signaling pathway	19	-4.72812	M1	1	0	19_GO:0002376 immune system process	-4.72812	7.0936	6.51439	27994	241	131	8	6.10687	2.09214	1147|2353|3551|3725|5530|5594|5599|5970	CHUK|FOS|IKBKB|JUN|PPP3CA|MAPK1|MAPK8|RELA	-3.57322	0	24	0	0	-19.0213	42.7389
GO Biological Processes	GO:0016242	negative regulation of macroautophagy	19	-4.72015	M1	1	0	19_GO:0048519 negative regulation of biological process	-4.72015	25.1405	9.65749	27994	34	131	4	3.05344	1.50323	207|2475|3162|7157	AKT1|MTOR|HMOX1|TP53	-3.56643	0	9	0	0	-26.9935	25.1405
GO Biological Processes	GO:0042311	vasodilation	19	-4.72015	M1	1	0	19_GO:0032501 multicellular organismal process	-4.72015	25.1405	9.65749	27994	34	131	4	3.05344	1.50323	153|154|1812|6647	ADRB1|ADRB2|DRD1|SOD1	-3.56643	0	127	0	0	-5.9193	30.5278
GO Biological Processes	GO:0046685	response to arsenic-containing substance	19	-4.72015	M1	1	0	19_GO:0050896 response to stimulus	-4.72015	25.1405	9.65749	27994	34	131	4	3.05344	1.50323	1026|1244|1543|3162	CDKN1A|ABCC2|CYP1A1|HMOX1	-3.56643	0	113	0	0	-6.65718	71.2316
GO Biological Processes	GO:0051187	cofactor catabolic process	19	-4.70529	M1	1	0	19_GO:0008152 metabolic process	-4.70529	15.2639	8.19304	27994	70	131	5	3.81679	1.67403	847|1800|3162|4353|50506	CAT|DPEP1|HMOX1|MPO|DUOX2	-3.55235	0	144	1	1	-4.70529	20.0339
GO Biological Processes	GO:0072347	response to anesthetic	19	-4.70529	M1	1	0	19_GO:0050896 response to stimulus	-4.70529	15.2639	8.19304	27994	70	131	5	3.81679	1.67403	1812|2155|2475|3309|5970	DRD1|F7|MTOR|HSPA5|RELA	-3.55235	0	70	0	0	-10.1429	15.2639
GO Biological Processes	GO:0014823	response to activity	19	-4.6752	M1	1	0	19_GO:0050896 response to stimulus	-4.6752	15.0489	8.12714	27994	71	131	5	3.81679	1.67403	847|983|2475|3091|5467	CAT|CDK1|MTOR|HIF1A|PPARD	-3.52421	0	145	1	1	-4.6752	15.0489
GO Biological Processes	GO:0032371	regulation of sterol transport	19	-4.6752	M1	1	0	19_GO:0051179 localization	-4.6752	15.0489	8.12714	27994	71	131	5	3.81679	1.67403	857|1950|4792|5444|5468	CAV1|EGF|NFKBIA|PON1|PPARG	-3.52421	0	75	0	0	-9.34547	32.0542
GO Biological Processes	GO:0032374	regulation of cholesterol transport	19	-4.6752	M1	1	0	19_GO:0051179 localization	-4.6752	15.0489	8.12714	27994	71	131	5	3.81679	1.67403	857|1950|4792|5444|5468	CAV1|EGF|NFKBIA|PON1|PPARG	-3.52421	0	75	0	0	-9.34547	32.0542
GO Biological Processes	GO:0033627	cell adhesion mediated by integrin	19	-4.6752	M1	1	0	19_GO:0022610 biological adhesion	-4.6752	15.0489	8.12714	27994	71	131	5	3.81679	1.67403	1545|1803|3383|5054|5328	CYP1B1|DPP4|ICAM1|SERPINE1|PLAU	-3.52421	0	46	0	0	-13.366	32.8761
GO Biological Processes	GO:0051785	positive regulation of nuclear division	19	-4.6752	M1	1	0	19_GO:0048518 positive regulation of biological process	-4.6752	15.0489	8.12714	27994	71	131	5	3.81679	1.67403	1950|3481|3552|3553|5925	EGF|IGF2|IL1A|IL1B|RB1	-3.52421	0	98	0	0	-7.6909	91.5834
GO Biological Processes	GO:0006983	ER overload response	19	-4.67034	M1	1	0	19_GO:0023052 signaling	-4.67034	53.4237	12.4545	27994	12	131	3	2.29008	1.30695	2932|3309|7157	GSK3B|HSPA5|TP53	-3.52012	0	37	0	0	-15.5965	53.4237
GO Biological Processes	GO:0051549	positive regulation of keratinocyte migration	19	-4.67034	M1	1	0	19_GO:0040011 locomotion	-4.67034	53.4237	12.4545	27994	12	131	3	2.29008	1.30695	2475|3037|4318	MTOR|HAS2|MMP9	-3.52012	0	126	0	0	-5.93287	53.4237
GO Biological Processes	GO:0006691	leukotriene metabolic process	19	-4.66902	M1	1	0	19_GO:0008152 metabolic process	-4.66902	24.4222	9.5071	27994	35	131	4	3.05344	1.50323	240|1800|4048|5321	ALOX5|DPEP1|LTA4H|PLA2G4A	-3.51997	0	146	1	1	-4.66902	30.5278
GO Biological Processes	GO:0060251	regulation of glial cell proliferation	19	-4.66902	M1	1	0	19_GO:0008283 cell proliferation	-4.66902	24.4222	9.5071	27994	35	131	4	3.05344	1.50323	1869|2475|3553|7124	E2F1|MTOR|IL1B|TNF	-3.51997	0	11	0	0	-26.7386	213.695
GO Biological Processes	GO:0071312	cellular response to alkaloid	19	-4.66902	M1	1	0	19_GO:0050896 response to stimulus	-4.66902	24.4222	9.5071	27994	35	131	4	3.05344	1.50323	598|836|2946|3383	BCL2L1|CASP3|GSTM2|ICAM1	-3.51997	0	84	0	0	-8.8128	24.4222
GO Biological Processes	GO:0007204	positive regulation of cytosolic calcium ion concentration	19	-4.66117	M1	1	0	19_GO:0065007 biological regulation	-4.66117	5.97283	6.15401	27994	322	131	9	6.87023	2.21001	581|596|857|1812|2099|2697|2946|3627|6373	BAX|BCL2|CAV1|DRD1|ESR1|GJA1|GSTM2|CXCL10|CXCL11	-3.5125	0	59	0	0	-11.5248	26.7118
GO Biological Processes	GO:0060147	regulation of posttranscriptional gene silencing	19	-4.65569	M1	1	0	19_GO:0048519 negative regulation of biological process	-4.65569	10.6847	7.28996	27994	120	131	6	4.58015	1.82652	1956|2099|5468|5530|7124|7157	EGFR|ESR1|PPARG|PPP3CA|TNF|TP53	-3.5078	0	99	0	0	-7.51638	61.0556
GO Biological Processes	GO:0060966	regulation of gene silencing by RNA	19	-4.65569	M1	1	0	19_GO:0048519 negative regulation of biological process	-4.65569	10.6847	7.28996	27994	120	131	6	4.58015	1.82652	1956|2099|5468|5530|7124|7157	EGFR|ESR1|PPARG|PPP3CA|TNF|TP53	-3.5078	0	99	0	0	-7.51638	61.0556
GO Biological Processes	GO:0042593	glucose homeostasis	19	-4.65158	M1	1	0	19_GO:0065007 biological regulation	-4.65158	6.92128	6.40919	27994	247	131	8	6.10687	2.09214	207|240|3091|3099|3383|5468|5530|5894	AKT1|ALOX5|HIF1A|HK2|ICAM1|PPARG|PPP3CA|RAF1	-3.50407	0	81	0	0	-8.93589	10.9587
GO Biological Processes	GO:0033692	cellular polysaccharide biosynthetic process	19	-4.64556	M1	1	0	19_GO:0008152 metabolic process	-4.64556	14.8399	8.06255	27994	72	131	5	3.81679	1.67403	207|2475|2932|3037|3481	AKT1|MTOR|GSK3B|HAS2|IGF2	-3.49922	0	29	0	0	-18.4437	33.7413
GO Biological Processes	GO:0042089	cytokine biosynthetic process	19	-4.64556	M1	1	0	19_GO:0032501 multicellular organismal process	-4.64556	14.8399	8.06255	27994	72	131	5	3.81679	1.67403	3162|3315|3458|3553|7124	HMOX1|HSPB1|IFNG|IL1B|TNF	-3.49922	0	11	0	0	-26.7386	213.695
GO Biological Processes	GO:1904427	positive regulation of calcium ion transmembrane transport	19	-4.64556	M1	1	0	19_GO:0048518 positive regulation of biological process	-4.64556	14.8399	8.06255	27994	72	131	5	3.81679	1.67403	581|1812|2946|3627|6373	BAX|DRD1|GSTM2|CXCL10|CXCL11	-3.49922	0	59	0	0	-11.5248	26.7118
GO Biological Processes	GO:0033500	carbohydrate homeostasis	19	-4.63903	M1	1	0	19_GO:0065007 biological regulation	-4.63903	6.89338	6.39199	27994	248	131	8	6.10687	2.09214	207|240|3091|3099|3383|5468|5530|5894	AKT1|ALOX5|HIF1A|HK2|ICAM1|PPARG|PPP3CA|RAF1	-3.49306	0	81	0	0	-8.93589	10.9587
GO Biological Processes	GO:0021987	cerebral cortex development	19	-4.63526	M1	1	0	19_GO:0032502 developmental process	-4.63526	10.5964	7.25366	27994	121	131	6	4.58015	1.82652	581|1281|1956|2932|3091|8648	BAX|COL3A1|EGFR|GSK3B|HIF1A|NCOA1	-3.49006	0	122	0	0	-6.2396	10.5964
GO Biological Processes	GO:0051193	regulation of cofactor metabolic process	19	-4.63526	M1	1	0	19_GO:0050789 regulation of biological process	-4.63526	10.5964	7.25366	27994	121	131	6	4.58015	1.82652	3091|3458|4314|4780|5465|7157	HIF1A|IFNG|MMP3|NFE2L2|PPARA|TP53	-3.49006	0	102	0	0	-7.42388	36.8439
GO Biological Processes	GO:0045742	positive regulation of epidermal growth factor receptor signaling pathway	19	-4.61944	M1	1	0	19_GO:0048518 positive regulation of biological process	-4.61944	23.7439	9.36286	27994	36	131	4	3.05344	1.50323	207|1950|4318|653361	AKT1|EGF|MMP9|NCF1	-3.4754	0	117	0	0	-6.34231	45.7917
GO Biological Processes	GO:0070873	regulation of glycogen metabolic process	19	-4.61944	M1	1	0	19_GO:0050789 regulation of biological process	-4.61944	23.7439	9.36286	27994	36	131	4	3.05344	1.50323	207|2475|2932|3481	AKT1|MTOR|GSK3B|IGF2	-3.4754	0	29	0	0	-18.4437	33.7413
GO Biological Processes	GO:1905332	positive regulation of morphogenesis of an epithelium	19	-4.61944	M1	1	0	19_GO:0048518 positive regulation of biological process	-4.61944	23.7439	9.36286	27994	36	131	4	3.05344	1.50323	367|2475|2697|7422	AR|MTOR|GJA1|VEGFA	-3.4754	0	31	0	0	-18.0915	106.847
GO Biological Processes	GO:0005977	glycogen metabolic process	19	-4.61637	M1	1	0	19_GO:0008152 metabolic process	-4.61637	14.6366	7.99925	27994	73	131	5	3.81679	1.67403	207|2475|2932|3481|3572	AKT1|MTOR|GSK3B|IGF2|IL6ST	-3.47424	0	29	0	0	-18.4437	33.7413
GO Biological Processes	GO:0042107	cytokine metabolic process	19	-4.61637	M1	1	0	19_GO:0008152 metabolic process	-4.61637	14.6366	7.99925	27994	73	131	5	3.81679	1.67403	3162|3315|3458|3553|7124	HMOX1|HSPB1|IFNG|IL1B|TNF	-3.47424	0	11	0	0	-26.7386	213.695
GO Biological Processes	GO:0051966	regulation of synaptic transmission, glutamatergic	19	-4.61637	M1	1	0	19_GO:0023052 signaling	-4.61637	14.6366	7.99925	27994	73	131	5	3.81679	1.67403	1812|1956|5743|6347|7124	DRD1|EGFR|PTGS2|CCL2|TNF	-3.47424	0	74	0	0	-9.55493	26.7118
GO Biological Processes	GO:0070227	lymphocyte apoptotic process	19	-4.61637	M1	1	0	19_GO:0009987 cellular process	-4.61637	14.6366	7.99925	27994	73	131	5	3.81679	1.67403	207|581|3091|3559|7157	AKT1|BAX|HIF1A|IL2RA|TP53	-3.47424	0	95	0	0	-7.88155	37.7108
GO Biological Processes	GO:1903747	regulation of establishment of protein localization to mitochondrion	19	-4.61637	M1	1	0	19_GO:0051179 localization	-4.61637	14.6366	7.99925	27994	73	131	5	3.81679	1.67403	596|841|1869|5599|7157	BCL2|CASP8|E2F1|MAPK8|TP53	-3.47424	0	53	0	0	-12.5473	42.7389
GO Biological Processes	GO:0032612	interleukin-1 production	19	-4.61501	M1	1	0	19_GO:0032501 multicellular organismal process	-4.61501	10.5096	7.21777	27994	122	131	6	4.58015	1.82652	841|2950|3315|3458|3553|7124	CASP8|GSTP1|HSPB1|IFNG|IL1B|TNF	-3.47402	0	11	0	0	-26.7386	213.695
GO Biological Processes	GO:0045446	endothelial cell differentiation	19	-4.61501	M1	1	0	19_GO:0032502 developmental process	-4.61501	10.5096	7.21777	27994	122	131	6	4.58015	1.82652	2194|3383|3551|3553|7124|7422	FASN|ICAM1|IKBKB|IL1B|TNF|VEGFA	-3.47402	0	111	0	0	-6.84834	53.4237
GO Biological Processes	GO:1901222	regulation of NIK/NF-kappaB signaling	19	-4.61501	M1	1	0	19_GO:0023052 signaling	-4.61501	10.5096	7.21777	27994	122	131	6	4.58015	1.82652	1956|3553|4306|4792|5970|7124	EGFR|IL1B|NR3C2|NFKBIA|RELA|TNF	-3.47402	0	85	0	0	-8.78624	33.2414
GO Biological Processes	GO:0071346	cellular response to interferon-gamma	19	-4.60605	M1	1	0	19_GO:0002376 immune system process	-4.60605	8.21903	6.69953	27994	182	131	7	5.34351	1.96496	3383|3458|5468|6347|6772|7157|7412	ICAM1|IFNG|PPARG|CCL2|STAT1|TP53|VCAM1	-3.46543	0	115	0	0	-6.56929	35.6158
GO Biological Processes	GO:1904375	regulation of protein localization to cell periphery	19	-4.59495	M1	1	0	19_GO:0051179 localization	-4.59495	10.4241	7.18231	27994	123	131	6	4.58015	1.82652	207|367|598|1956|3458|7124	AKT1|AR|BCL2L1|EGFR|IFNG|TNF	-3.45472	0	11	0	0	-26.7386	213.695
GO Biological Processes	GO:0006986	response to unfolded protein	19	-4.59078	M1	1	0	19_GO:0050896 response to stimulus	-4.59078	8.17411	6.67624	27994	183	131	7	5.34351	1.96496	581|595|3309|3315|3576|4780|6347	BAX|CCND1|HSPA5|HSPB1|CXCL8|NFE2L2|CCL2	-3.45169	0	82	0	0	-8.85563	40.7037
GO Biological Processes	GO:0043433	negative regulation of DNA-binding transcription factor activity	19	-4.59078	M1	1	0	19_GO:0048519 negative regulation of biological process	-4.59078	8.17411	6.67624	27994	183	131	7	5.34351	1.96496	847|1147|1545|2099|3162|4792|5925	CAT|CHUK|CYP1B1|ESR1|HMOX1|NFKBIA|RB1	-3.45169	0	147	1	1	-4.59078	9.19117
GO Biological Processes	GO:0055001	muscle cell development	19	-4.59078	M1	1	0	19_GO:0032502 developmental process	-4.59078	8.17411	6.67624	27994	183	131	7	5.34351	1.96496	596|891|983|2475|5465|5530|7422	BCL2|CCNB1|CDK1|MTOR|PPARA|PPP3CA|VEGFA	-3.45169	0	63	0	0	-11.069	71.2316
GO Biological Processes	GO:0042119	neutrophil activation	19	-4.58809	M1	1	0	19_GO:0002376 immune system process	-4.58809	4.67324	5.70013	27994	503	131	11	8.39695	2.42315	240|847|1509|2950|3576|4048|4318|4353|5328|5594|6590	ALOX5|CAT|CTSD|GSTP1|CXCL8|LTA4H|MMP9|MPO|PLAU|MAPK1|SLPI	-3.44966	0	80	0	0	-8.9986	5.35576
GO Biological Processes	GO:0006073	cellular glucan metabolic process	19	-4.58761	M1	1	0	19_GO:0008152 metabolic process	-4.58761	14.4388	7.93718	27994	74	131	5	3.81679	1.67403	207|2475|2932|3481|3572	AKT1|MTOR|GSK3B|IGF2|IL6ST	-3.44966	0	29	0	0	-18.4437	33.7413
GO Biological Processes	GO:0044042	glucan metabolic process	19	-4.58761	M1	1	0	19_GO:0008152 metabolic process	-4.58761	14.4388	7.93718	27994	74	131	5	3.81679	1.67403	207|2475|2932|3481|3572	AKT1|MTOR|GSK3B|IGF2|IL6ST	-3.44966	0	29	0	0	-18.4437	33.7413
GO Biological Processes	GO:0030212	hyaluronan metabolic process	19	-4.57133	M1	1	0	19_GO:0008152 metabolic process	-4.57133	23.1021	9.22436	27994	37	131	4	3.05344	1.50323	207|1950|3037|3553	AKT1|EGF|HAS2|IL1B	-3.43374	0	117	0	0	-6.34231	45.7917
GO Biological Processes	GO:0046328	regulation of JNK cascade	19	-4.56054	M1	1	0	19_GO:0023052 signaling	-4.56054	8.08574	6.63018	27994	185	131	7	5.34351	1.96496	207|959|1956|2950|3553|7124|653361	AKT1|CD40LG|EGFR|GSTP1|IL1B|TNF|NCF1	-3.42334	0	35	0	0	-16.3031	20.6801
GO Biological Processes	GO:0045685	regulation of glial cell differentiation	19	-4.55927	M1	1	0	19_GO:0032502 developmental process	-4.55927	14.2463	7.8763	27994	75	131	5	3.81679	1.67403	983|2475|3572|5468|5970	CDK1|MTOR|IL6ST|PPARG|RELA	-3.42331	0	48	0	0	-13.0283	19.4268
GO Biological Processes	GO:0046323	glucose import	19	-4.55927	M1	1	0	19_GO:0051179 localization	-4.55927	14.2463	7.8763	27994	75	131	5	3.81679	1.67403	207|1812|3099|4780|7124	AKT1|DRD1|HK2|NFE2L2|TNF	-3.42331	0	104	0	0	-7.26254	29.1402
GO Biological Processes	GO:0010745	negative regulation of macrophage derived foam cell differentiation	19	-4.55788	M1	1	0	19_GO:0048519 negative regulation of biological process	-4.55788	49.3142	11.9471	27994	13	131	3	2.29008	1.30695	4792|5465|5468	NFKBIA|PPARA|PPARG	-3.42331	0	73	0	0	-9.68214	64.1084
GO Biological Processes	GO:0016264	gap junction assembly	19	-4.55788	M1	1	0	19_GO:0071840 cellular component organization or biogenesis	-4.55788	49.3142	11.9471	27994	13	131	3	2.29008	1.30695	857|2697|3553	CAV1|GJA1|IL1B	-3.42331	0	143	0	0	-4.79379	58.2804
GO Biological Processes	GO:0030656	regulation of vitamin metabolic process	19	-4.55788	M1	1	0	19_GO:0050789 regulation of biological process	-4.55788	49.3142	11.9471	27994	13	131	3	2.29008	1.30695	3458|3553|7124	IFNG|IL1B|TNF	-3.42331	0	11	0	0	-26.7386	213.695
GO Biological Processes	GO:0031650	regulation of heat generation	19	-4.55788	M1	1	0	19_GO:0032501 multicellular organismal process	-4.55788	49.3142	11.9471	27994	13	131	3	2.29008	1.30695	3553|5743|7124	IL1B|PTGS2|TNF	-3.42331	0	11	0	0	-26.7386	213.695
GO Biological Processes	GO:0061043	regulation of vascular wound healing	19	-4.55788	M1	1	0	19_GO:0032502 developmental process	-4.55788	49.3142	11.9471	27994	13	131	3	2.29008	1.30695	240|5054|7124	ALOX5|SERPINE1|TNF	-3.42331	0	131	0	0	-5.58891	91.5834
GO Biological Processes	GO:0030968	endoplasmic reticulum unfolded protein response	19	-4.55536	M1	1	0	19_GO:0023052 signaling	-4.55536	10.2573	7.11258	27994	125	131	6	4.58015	1.82652	581|595|3309|3576|4780|6347	BAX|CCND1|HSPA5|CXCL8|NFE2L2|CCL2	-3.42116	0	82	0	0	-8.85563	40.7037
GO Biological Processes	GO:0036230	granulocyte activation	19	-4.54114	M1	1	0	19_GO:0002376 immune system process	-4.54114	4.61816	5.64865	27994	509	131	11	8.39695	2.42315	240|847|1509|2950|3576|4048|4318|4353|5328|5594|6590	ALOX5|CAT|CTSD|GSTP1|CXCL8|LTA4H|MMP9|MPO|PLAU|MAPK1|SLPI	-3.40731	0	80	0	0	-8.9986	5.35576
GO Biological Processes	GO:0016485	protein processing	19	-4.52666	M1	1	0	19_GO:0008152 metabolic process	-4.52666	5.74105	5.98584	27994	335	131	9	6.87023	2.21001	142|836|841|2152|2155|3553|5054|5327|5328	PARP1|CASP3|CASP8|F3|F7|IL1B|SERPINE1|PLAT|PLAU	-3.39321	0	46	0	0	-13.366	32.8761
GO Biological Processes	GO:0010742	macrophage derived foam cell differentiation	19	-4.52459	M1	1	0	19_GO:0032502 developmental process	-4.52459	22.4942	9.09121	27994	38	131	4	3.05344	1.50323	4792|5465|5468|6772	NFKBIA|PPARA|PPARG|STAT1	-3.39226	0	73	0	0	-9.68214	64.1084
GO Biological Processes	GO:0090077	foam cell differentiation	19	-4.52459	M1	1	0	19_GO:0032502 developmental process	-4.52459	22.4942	9.09121	27994	38	131	4	3.05344	1.50323	4792|5465|5468|6772	NFKBIA|PPARA|PPARG|STAT1	-3.39226	0	73	0	0	-9.68214	64.1084
GO Biological Processes	GO:1901186	positive regulation of ERBB signaling pathway	19	-4.52459	M1	1	0	19_GO:0048518 positive regulation of biological process	-4.52459	22.4942	9.09121	27994	38	131	4	3.05344	1.50323	207|1950|4318|653361	AKT1|EGF|MMP9|NCF1	-3.39226	0	117	0	0	-6.34231	45.7917
GO Biological Processes	GO:0072507	divalent inorganic cation homeostasis	19	-4.51792	M1	1	0	19_GO:0065007 biological regulation	-4.51792	4.5911	5.62321	27994	512	131	11	8.39695	2.42315	581|596|857|1812|1956|2099|2697|2946|3627|5579|6373	BAX|BCL2|CAV1|DRD1|EGFR|ESR1|GJA1|GSTM2|CXCL10|PRKCB|CXCL11	-3.38596	0	59	0	0	-11.5248	26.7118
GO Biological Processes	GO:0034329	cell junction assembly	19	-4.51665	M1	1	0	19_GO:0071840 cellular component organization or biogenesis	-4.51665	6.62619	6.22514	27994	258	131	8	6.10687	2.09214	596|857|2697|3551|3553|5578|7124|7422	BCL2|CAV1|GJA1|IKBKB|IL1B|PRKCA|TNF|VEGFA	-3.38525	0	111	0	0	-6.84834	53.4237
GO Biological Processes	GO:0014066	regulation of phosphatidylinositol 3-kinase signaling	19	-4.51646	M1	1	0	19_GO:0023052 signaling	-4.51646	10.0958	7.04441	27994	127	131	6	4.58015	1.82652	847|1956|5467|5594|7124|653361	CAT|EGFR|PPARD|MAPK1|TNF|NCF1	-3.38525	0	124	0	0	-6.16606	11.101
GO Biological Processes	GO:0007422	peripheral nervous system development	19	-4.50381	M1	1	0	19_GO:0032502 developmental process	-4.50381	13.8763	7.75796	27994	77	131	5	3.81679	1.67403	207|983|2064|5970|6647	AKT1|CDK1|ERBB2|RELA|SOD1	-3.37296	0	148	1	1	-4.50381	21.9174
GO Biological Processes	GO:0010508	positive regulation of autophagy	19	-4.49726	M1	1	0	19_GO:0048518 positive regulation of biological process	-4.49726	10.0169	7.01089	27994	128	131	6	4.58015	1.82652	154|2932|3091|3099|3162|3458	ADRB2|GSK3B|HIF1A|HK2|HMOX1|IFNG	-3.36679	0	123	0	0	-6.22138	80.1355
GO Biological Processes	GO:0051607	defense response to virus	19	-4.49284	M1	1	0	19_GO:0051704 multi-organism process	-4.49284	6.57522	6.19283	27994	260	131	8	6.10687	2.09214	596|598|3458|3553|3559|3627|5970|6772	BCL2|BCL2L1|IFNG|IL1B|IL2RA|CXCL10|RELA|STAT1	-3.36274	0	65	0	0	-11.0015	9.74107
GO Biological Processes	GO:0001501	skeletal system development	19	-4.47959	M1	1	0	19_GO:0032502 developmental process	-4.47959	4.54669	5.58124	27994	517	131	11	8.39695	2.42315	860|1277|1281|2697|3037|3091|3481|4313|4318|5970|7157	RUNX2|COL1A1|COL3A1|GJA1|HAS2|HIF1A|IGF2|MMP2|MMP9|RELA|TP53	-3.35055	0	135	0	0	-5.27638	5.23761
GO Biological Processes	GO:0014037	Schwann cell differentiation	19	-4.47917	M1	1	0	19_GO:0032502 developmental process	-4.47917	21.9174	8.96307	27994	39	131	4	3.05344	1.50323	207|983|5970|6647	AKT1|CDK1|RELA|SOD1	-3.35055	0	148	0	0	-4.50381	21.9174
GO Biological Processes	GO:0034205	amyloid-beta formation	19	-4.47917	M1	1	0	19_GO:0008152 metabolic process	-4.47917	21.9174	8.96307	27994	39	131	4	3.05344	1.50323	836|3458|5970|7124	CASP3|IFNG|RELA|TNF	-3.35055	0	11	0	0	-26.7386	213.695
GO Biological Processes	GO:1904706	negative regulation of vascular smooth muscle cell proliferation	19	-4.47917	M1	1	0	19_GO:0008283 cell proliferation	-4.47917	21.9174	8.96307	27994	39	131	4	3.05344	1.50323	1026|2950|3162|5468	CDKN1A|GSTP1|HMOX1|PPARG	-3.35055	0	21	0	0	-19.9812	24.8965
GO Biological Processes	GO:0072332	intrinsic apoptotic signaling pathway by p53 class mediator	19	-4.47666	M1	1	0	19_GO:0023052 signaling	-4.47666	13.6984	7.70044	27994	78	131	5	3.81679	1.67403	581|596|1026|1869|7157	BAX|BCL2|CDKN1A|E2F1|TP53	-3.34841	0	83	0	0	-8.8504	45.7917
GO Biological Processes	GO:0034248	regulation of cellular amide metabolic process	19	-4.47198	M1	1	0	19_GO:0050789 regulation of biological process	-4.47198	4.53792	5.57291	27994	518	131	11	8.39695	2.42315	207|836|2064|2475|3315|3458|4780|5594|5970|7124|7157	AKT1|CASP3|ERBB2|MTOR|HSPB1|IFNG|NFE2L2|MAPK1|RELA|TNF|TP53	-3.3441	0	48	0	0	-13.0283	19.4268
GO Biological Processes	GO:0098542	defense response to other organism	19	-4.46121	M1	1	0	19_GO:0051704 multi-organism process	-4.46121	4.15614	5.43565	27994	617	131	12	9.16031	2.52033	596|598|3458|3553|3559|3627|4353|5054|5970|6590|6772|7124	BCL2|BCL2L1|IFNG|IL1B|IL2RA|CXCL10|MPO|SERPINE1|RELA|SLPI|STAT1|TNF	-3.3337	0	65	0	0	-11.0015	9.74107
GO Biological Processes	GO:0034101	erythrocyte homeostasis	19	-4.45937	M1	1	0	19_GO:0002376 immune system process	-4.45937	9.86283	6.94495	27994	130	131	6	4.58015	1.82652	836|3091|3162|5925|6772|7422	CASP3|HIF1A|HMOX1|RB1|STAT1|VEGFA	-3.33223	0	103	0	0	-7.42142	11.0294
GO Biological Processes	GO:0021537	telencephalon development	19	-4.45751	M1	1	0	19_GO:0032502 developmental process	-4.45751	6.50022	6.14499	27994	263	131	8	6.10687	2.09214	581|836|1281|1812|1956|2932|3091|8648	BAX|CASP3|COL3A1|DRD1|EGFR|GSK3B|HIF1A|NCOA1	-3.3311	0	122	0	0	-6.2396	10.5964
GO Biological Processes	GO:1901617	organic hydroxy compound biosynthetic process	19	-4.45751	M1	1	0	19_GO:0008152 metabolic process	-4.45751	6.50022	6.14499	27994	263	131	8	6.10687	2.09214	231|1576|2194|3458|3553|6647|7124|7157	AKR1B1|CYP3A4|FASN|IFNG|IL1B|SOD1|TNF|TP53	-3.3311	0	11	0	0	-26.7386	213.695
[truncated: 1,053 more rows]
