# Supplementary material for: Exploring the Molecular Mechanism of Liuwei Dihuang Pills for Treating Diabetic Nephropathy by Combined Network Pharmacology and Molecular Docking
Source: Research Square preprint supplement (doi:10.21203/rs.3.rs-463825/v1), 2021-05-05
Supplement: Supplementary file 2 [file 6efc4c113c78b947522db12e.xls]

## Sheet: Sheet1
Table S2 3701 disease targets of diabetic nephropathy from the five databases
Gene Symbol	Source
SLC5A2	GeneCards, DisGeNET, TTD, and DrugBank
INSR	GeneCards, OMIM, DisGeNET,and TTD
CCR5	GeneCards, OMIM, DisGeNET,and TTD
ACE	GeneCards, OMIM, DisGeNET,and DrugBank
PPARG	GeneCards, OMIM, DisGeNET,and DrugBank
REN	GeneCards, OMIM, DisGeNET,and DrugBank
INS	GeneCards, OMIM, and DisGeNET
HNF1B	GeneCards, OMIM, and DisGeNET
KCNJ11	GeneCards, OMIM, and DisGeNET
GCK	GeneCards, OMIM, and DisGeNET
ABCC8	GeneCards, OMIM, and DisGeNET
HNF1A	GeneCards, OMIM, and DisGeNET
HNF4A	GeneCards, OMIM, and DisGeNET
WFS1	GeneCards, OMIM, and DisGeNET
VEGFA	GeneCards, OMIM, and DisGeNET
IL6	GeneCards, OMIM, and DisGeNET
UMOD	GeneCards, OMIM, and DisGeNET
PON1	GeneCards, OMIM, and DisGeNET
TCF7L2	GeneCards, OMIM, and DisGeNET
SLC2A2	GeneCards, OMIM, and DisGeNET
IRS1	GeneCards, OMIM, and DisGeNET
RETN	GeneCards, OMIM, and DisGeNET
SOD2	GeneCards, OMIM, and DisGeNET
SLC30A8	GeneCards, OMIM, and DisGeNET
COL4A1	GeneCards, OMIM, and DisGeNET
AQP2	GeneCards, OMIM, and DisGeNET
HFE	GeneCards, OMIM, and DisGeNET
IL1RN	GeneCards, OMIM, and DisGeNET
AVP	GeneCards, OMIM, and DisGeNET
ENPP1	GeneCards, OMIM, and DisGeNET
EPO	GeneCards, OMIM, and DisGeNET
IGF2BP2	GeneCards, OMIM, and DisGeNET
CAPN10	GeneCards, OMIM, and DisGeNET
IRS2	GeneCards, OMIM, and DisGeNET
SUMO4	GeneCards, OMIM, and DisGeNET
IAPP	GeneCards, OMIM, and DisGeNET
AVPR2	GeneCards, OMIM, and DisGeNET
LIPC	GeneCards, OMIM, and DisGeNET
UCP3	GeneCards, OMIM, and DisGeNET
SPINK1	GeneCards, OMIM, and DisGeNET
AGTR1	GeneCards, DisGeNET, and DrugBank
ALB	GeneCards, DisGeNET, and DrugBank
MTHFR	GeneCards, DisGeNET, and DrugBank
MMP2	GeneCards, DisGeNET, and DrugBank
MMP9	GeneCards, DisGeNET, and DrugBank
JUN	GeneCards, DisGeNET, and DrugBank
SLC22A6	GeneCards, DisGeNET, and DrugBank
SLC22A8	GeneCards, DisGeNET, and DrugBank
PTGS1	GeneCards, DisGeNET, and DrugBank
AGER	GeneCards, DisGeNET, and TTD
IGF1R	GeneCards, DisGeNET, and TTD
MME	GeneCards, DisGeNET, and TTD
AOC3	GeneCards, DisGeNET, and TTD
NR3C2	GeneCards, DisGeNET, and TTD
MMP1	GeneCards, DisGeNET, and TTD
EDNRA	GeneCards, DisGeNET, and TTD
HTR2A	GeneCards, DisGeNET, and TTD
TGFBR1	GeneCards, DisGeNET, and TTD
CCR2	GeneCards, DisGeNET, and TTD
ROCK1	GeneCards, DisGeNET, and TTD
MAP3K5	GeneCards, DisGeNET, and TTD
UTS2R	GeneCards, DisGeNET, and TTD
PDX1	GeneCards and OMIM
NEUROD1	GeneCards and OMIM
PAX4	GeneCards and OMIM
KLF11	GeneCards and OMIM
BLK	GeneCards and OMIM
GLIS3	GeneCards and OMIM
CTLA4	GeneCards and OMIM
IL2RA	GeneCards and OMIM
MTNR1B	GeneCards and OMIM
ZFP57	GeneCards and OMIM
CEL	GeneCards and OMIM
PTPN22	GeneCards and OMIM
DNAJC3	GeneCards and OMIM
APPL1	GeneCards and OMIM
XPNPEP3	GeneCards and OMIM
FOXC2	GeneCards and OMIM
MAFA	GeneCards and OMIM
AKT2	GeneCards and OMIM
CFHR5	GeneCards and OMIM
ITPR3	GeneCards and OMIM
SEC61A1	GeneCards and OMIM
CD151	GeneCards and OMIM
SPRY2	GeneCards and OMIM
LEP	GeneCards and DisGeNET
AGT	GeneCards and DisGeNET
IGF1	GeneCards and DisGeNET
CCL2	GeneCards and DisGeNET
NOS3	GeneCards and DisGeNET
APOA1	GeneCards and DisGeNET
B2M	GeneCards and DisGeNET
TGFB1	GeneCards and DisGeNET
APOE	GeneCards and DisGeNET
MIR21	GeneCards and DisGeNET
ADIPOQ	GeneCards and DisGeNET
FOXP3	GeneCards and DisGeNET
HLA-DRB1	GeneCards and DisGeNET
TNF	GeneCards and DisGeNET
AKT1	GeneCards and DisGeNET
SLC2A4	GeneCards and DisGeNET
TP53	GeneCards and DisGeNET
HLA-DQA1	GeneCards and DisGeNET
LEPR	GeneCards and DisGeNET
NLRP3	GeneCards and DisGeNET
SLC2A1	GeneCards and DisGeNET
AKR1B1	GeneCards and DisGeNET
IGF2	GeneCards and DisGeNET
CRP	GeneCards and DisGeNET
EIF2AK3	GeneCards and DisGeNET
STAT3	GeneCards and DisGeNET
KCNQ1	GeneCards and DisGeNET
PTH	GeneCards and DisGeNET
LPL	GeneCards and DisGeNET
FN1	GeneCards and DisGeNET
PIK3R1	GeneCards and DisGeNET
GCG	GeneCards and DisGeNET
SLC12A3	GeneCards and DisGeNET
STAT1	GeneCards and DisGeNET
GHR	GeneCards and DisGeNET
WT1	GeneCards and DisGeNET
NPHS1	GeneCards and DisGeNET
CDKN2A	GeneCards and DisGeNET
IL1B	GeneCards and DisGeNET
SERPINE1	GeneCards and DisGeNET
ICAM1	GeneCards and DisGeNET
CTNNB1	GeneCards and DisGeNET
DPP4	GeneCards and DisGeNET
BDNF	GeneCards and DisGeNET
IL10	GeneCards and DisGeNET
SAA1	GeneCards and DisGeNET
FLT1	GeneCards and DisGeNET
CCN2	GeneCards and DisGeNET
MBL2	GeneCards and DisGeNET
LCN2	GeneCards and DisGeNET
APOB	GeneCards and DisGeNET
VCAM1	GeneCards and DisGeNET
LMNA	GeneCards and DisGeNET
PRKCB	GeneCards and DisGeNET
EDN1	GeneCards and DisGeNET
ATM	GeneCards and DisGeNET
CST3	GeneCards and DisGeNET
CXCL8	GeneCards and DisGeNET
C3	GeneCards and DisGeNET
CD40LG	GeneCards and DisGeNET
RBP4	GeneCards and DisGeNET
IL18	GeneCards and DisGeNET
CDKAL1	GeneCards and DisGeNET
MEG3	GeneCards and DisGeNET
SOD1	GeneCards and DisGeNET
TLR4	GeneCards and DisGeNET
MIR192	GeneCards and DisGeNET
TSC1	GeneCards and DisGeNET
FTO	GeneCards and DisGeNET
NPPA	GeneCards and DisGeNET
IGFBP1	GeneCards and DisGeNET
VDR	GeneCards and DisGeNET
CAT	GeneCards and DisGeNET
MYH9	GeneCards and DisGeNET
IL4	GeneCards and DisGeNET
CAV1	GeneCards and DisGeNET
IGFBP3	GeneCards and DisGeNET
BGLAP	GeneCards and DisGeNET
CETP	GeneCards and DisGeNET
NPHS2	GeneCards and DisGeNET
APOC3	GeneCards and DisGeNET
SLC12A1	GeneCards and DisGeNET
LPA	GeneCards and DisGeNET
HP	GeneCards and DisGeNET
PVT1	GeneCards and DisGeNET
EGF	GeneCards and DisGeNET
MIR155	GeneCards and DisGeNET
COL4A5	GeneCards and DisGeNET
PPARA	GeneCards and DisGeNET
SGK1	GeneCards and DisGeNET
CNDP1	GeneCards and DisGeNET
VWF	GeneCards and DisGeNET
CCR6	GeneCards and DisGeNET
TLR2	GeneCards and DisGeNET
NPY	GeneCards and DisGeNET
IFNG	GeneCards and DisGeNET
UCP2	GeneCards and DisGeNET
UCP1	GeneCards and DisGeNET
NOS2	GeneCards and DisGeNET
HIF1A	GeneCards and DisGeNET
THBD	GeneCards and DisGeNET
MTOR	GeneCards and DisGeNET
LTA	GeneCards and DisGeNET
ST3GAL4	GeneCards and DisGeNET
GH1	GeneCards and DisGeNET
CXCL10	GeneCards and DisGeNET
MIR377	GeneCards and DisGeNET
FGF2	GeneCards and DisGeNET
TNFRSF11B	GeneCards and DisGeNET
MIR20A	GeneCards and DisGeNET
HMOX1	GeneCards and DisGeNET
IL2	GeneCards and DisGeNET
AGTR2	GeneCards and DisGeNET
IL17A	GeneCards and DisGeNET
APOA4	GeneCards and DisGeNET
MAPK1	GeneCards and DisGeNET
SELL	GeneCards and DisGeNET
NOD2	GeneCards and DisGeNET
PIK3CG	GeneCards and DisGeNET
NPPB	GeneCards and DisGeNET
GHRL	GeneCards and DisGeNET
MIR27A	GeneCards and DisGeNET
MIR30A	GeneCards and DisGeNET
SELP	GeneCards and DisGeNET
SIRT1	GeneCards and DisGeNET
CP	GeneCards and DisGeNET
ESR1	GeneCards and DisGeNET
MAPK8	GeneCards and DisGeNET
MPO	GeneCards and DisGeNET
MAPK14	GeneCards and DisGeNET
AHSG	GeneCards and DisGeNET
MEFV	GeneCards and DisGeNET
XBP1	GeneCards and DisGeNET
VTN	GeneCards and DisGeNET
SOCS1	GeneCards and DisGeNET
SOCS3	GeneCards and DisGeNET
MIR126	GeneCards and DisGeNET
TNFRSF1A	GeneCards and DisGeNET
GLP1R	GeneCards and DisGeNET
PTGS2	GeneCards and DisGeNET
MIR145	GeneCards and DisGeNET
HLA-B	GeneCards and DisGeNET
FGF21	GeneCards and DisGeNET
GSR	GeneCards and DisGeNET
FABP2	GeneCards and DisGeNET
CASP3	GeneCards and DisGeNET
MGAM	GeneCards and DisGeNET
ADM	GeneCards and DisGeNET
ATF6	GeneCards and DisGeNET
SPP1	GeneCards and DisGeNET
UTS2	GeneCards and DisGeNET
MAPK3	GeneCards and DisGeNET
TF	GeneCards and DisGeNET
IL1R1	GeneCards and DisGeNET
SERPINF1	GeneCards and DisGeNET
ANGPT2	GeneCards and DisGeNET
CCL5	GeneCards and DisGeNET
SORD	GeneCards and DisGeNET
CYP27B1	GeneCards and DisGeNET
PCSK1	GeneCards and DisGeNET
HGF	GeneCards and DisGeNET
STAT5B	GeneCards and DisGeNET
APOA5	GeneCards and DisGeNET
HSPA1A	GeneCards and DisGeNET
KDR	GeneCards and DisGeNET
GC	GeneCards and DisGeNET
SI	GeneCards and DisGeNET
ACE2	GeneCards and DisGeNET
IL1A	GeneCards and DisGeNET
ABCA1	GeneCards and DisGeNET
FABP1	GeneCards and DisGeNET
HAVCR1	GeneCards and DisGeNET
ITGAM	GeneCards and DisGeNET
PLG	GeneCards and DisGeNET
TGM2	GeneCards and DisGeNET
HSPA4	GeneCards and DisGeNET
CYP19A1	GeneCards and DisGeNET
ADD1	GeneCards and DisGeNET
APRT	GeneCards and DisGeNET
NOTCH3	GeneCards and DisGeNET
CD80	GeneCards and DisGeNET
SLC5A1	GeneCards and DisGeNET
MALAT1	GeneCards and DisGeNET
MIR181A2	GeneCards and DisGeNET
TRH	GeneCards and DisGeNET
MIR146A	GeneCards and DisGeNET
LRP5	GeneCards and DisGeNET
IL6R	GeneCards and DisGeNET
HSD11B2	GeneCards and DisGeNET
PRKAB1	GeneCards and DisGeNET
IKBKB	GeneCards and DisGeNET
TGFB2	GeneCards and DisGeNET
PTEN	GeneCards and DisGeNET
PECAM1	GeneCards and DisGeNET
IGFBP7	GeneCards and DisGeNET
CXCL12	GeneCards and DisGeNET
JAK2	GeneCards and DisGeNET
TKT	GeneCards and DisGeNET
FGF23	GeneCards and DisGeNET
PIK3CA	GeneCards and DisGeNET
PARP1	GeneCards and DisGeNET
TIMP3	GeneCards and DisGeNET
IL13	GeneCards and DisGeNET
CD2AP	GeneCards and DisGeNET
HSPA5	GeneCards and DisGeNET
EP300	GeneCards and DisGeNET
IL18R1	GeneCards and DisGeNET
IFNA1	GeneCards and DisGeNET
IL15	GeneCards and DisGeNET
ADORA1	GeneCards and DisGeNET
LRP2	GeneCards and DisGeNET
XDH	GeneCards and DisGeNET
HMGB1	GeneCards and DisGeNET
PAX2	GeneCards and DisGeNET
BMP7	GeneCards and DisGeNET
TIMP1	GeneCards and DisGeNET
IL5	GeneCards and DisGeNET
CREB1	GeneCards and DisGeNET
RAC1	GeneCards and DisGeNET
FAS	GeneCards and DisGeNET
PPARGC1A	GeneCards and DisGeNET
ANGPT1	GeneCards and DisGeNET
SHBG	GeneCards and DisGeNET
CD38	GeneCards and DisGeNET
MIR125A	GeneCards and DisGeNET
MIR342	GeneCards and DisGeNET
MLXIPL	GeneCards and DisGeNET
HSPG2	GeneCards and DisGeNET
PTPN2	GeneCards and DisGeNET
MIR675	GeneCards and DisGeNET
ACTN4	GeneCards and DisGeNET
CTSB	GeneCards and DisGeNET
SLPI	GeneCards and DisGeNET
F5	GeneCards and DisGeNET
PTX3	GeneCards and DisGeNET
MFN2	GeneCards and DisGeNET
TRPC6	GeneCards and DisGeNET
ACTB	GeneCards and DisGeNET
THBS1	GeneCards and DisGeNET
PTGDS	GeneCards and DisGeNET
APOL1	GeneCards and DisGeNET
CASP8	GeneCards and DisGeNET
TFRC	GeneCards and DisGeNET
CLU	GeneCards and DisGeNET
G6PD	GeneCards and DisGeNET
TIMP2	GeneCards and DisGeNET
MIR217	GeneCards and DisGeNET
MIR29A	GeneCards and DisGeNET
NLRP1	GeneCards and DisGeNET
NFE2L2	GeneCards and DisGeNET
ADIPOR1	GeneCards and DisGeNET
NFKBIA	GeneCards and DisGeNET
FNDC5	GeneCards and DisGeNET
PON2	GeneCards and DisGeNET
GAST	GeneCards and DisGeNET
FABP4	GeneCards and DisGeNET
CYBA	GeneCards and DisGeNET
GAS5	GeneCards and DisGeNET
FOXO1	GeneCards and DisGeNET
MIR93	GeneCards and DisGeNET
MIR29C	GeneCards and DisGeNET
ETS1	GeneCards and DisGeNET
CPT2	GeneCards and DisGeNET
MIR210	GeneCards and DisGeNET
PSMD9	GeneCards and DisGeNET
SMAD3	GeneCards and DisGeNET
GFPT1	GeneCards and DisGeNET
EGFR	GeneCards and DisGeNET
PTPN11	GeneCards and DisGeNET
SMAD2	GeneCards and DisGeNET
MAP2K7	GeneCards and DisGeNET
TNFRSF1B	GeneCards and DisGeNET
BMP2	GeneCards and DisGeNET
PLA2G1B	GeneCards and DisGeNET
MIR499A	GeneCards and DisGeNET
MIR200B	GeneCards and DisGeNET
SP1	GeneCards and DisGeNET
PRKAA2	GeneCards and DisGeNET
NR5A1	GeneCards and DisGeNET
MIR15A	GeneCards and DisGeNET
CNR1	GeneCards and DisGeNET
RARRES2	GeneCards and DisGeNET
MIR25	GeneCards and DisGeNET
ADIPOR2	GeneCards and DisGeNET
HLA-DPA1	GeneCards and DisGeNET
APLN	GeneCards and DisGeNET
GSTM1	GeneCards and DisGeNET
HSPB1	GeneCards and DisGeNET
GREM1	GeneCards and DisGeNET
ACACB	GeneCards and DisGeNET
PKD1	GeneCards and DisGeNET
PLA2R1	GeneCards and DisGeNET
S100A8	GeneCards and DisGeNET
ELMO1	GeneCards and DisGeNET
GDF15	GeneCards and DisGeNET
TNFSF10	GeneCards and DisGeNET
MLN	GeneCards and DisGeNET
TXNIP	GeneCards and DisGeNET
MIR214	GeneCards and DisGeNET
CYP11B2	GeneCards and DisGeNET
PTHLH	GeneCards and DisGeNET
NOX4	GeneCards and DisGeNET
PLA2G7	GeneCards and DisGeNET
APOM	GeneCards and DisGeNET
ADAMTS13	GeneCards and DisGeNET
HES1	GeneCards and DisGeNET
SLIT2	GeneCards and DisGeNET
OGA	GeneCards and DisGeNET
PPIG	GeneCards and DisGeNET
TGIF1	GeneCards and DisGeNET
ANGPTL4	GeneCards and DisGeNET
MIR223	GeneCards and DisGeNET
KNG1	GeneCards and DisGeNET
MIR34A	GeneCards and DisGeNET
MIF	GeneCards and DisGeNET
SREBF1	GeneCards and DisGeNET
STAT5A	GeneCards and DisGeNET
ALOX12	GeneCards and DisGeNET
SOD3	GeneCards and DisGeNET
PEA15	GeneCards and DisGeNET
KL	GeneCards and DisGeNET
BMP4	GeneCards and DisGeNET
PRKCA	GeneCards and DisGeNET
SYVN1	GeneCards and DisGeNET
TUG1	GeneCards and DisGeNET
ALDH2	GeneCards and DisGeNET
MGP	GeneCards and DisGeNET
GLO1	GeneCards and DisGeNET
BCL2	GeneCards and DisGeNET
NOTCH1	GeneCards and DisGeNET
NFKB1	GeneCards and DisGeNET
PPARD	GeneCards and DisGeNET
HMGA2	GeneCards and DisGeNET
SOX2	GeneCards and DisGeNET
RELA	GeneCards and DisGeNET
FOXA1	GeneCards and DisGeNET
SORBS1	GeneCards and DisGeNET
CD44	GeneCards and DisGeNET
INPPL1	GeneCards and DisGeNET
GAS6	GeneCards and DisGeNET
CDKN2B-AS1	GeneCards and DisGeNET
PDGFA	GeneCards and DisGeNET
APOC1	GeneCards and DisGeNET
SLC17A5	GeneCards and DisGeNET
POSTN	GeneCards and DisGeNET
SIRT3	GeneCards and DisGeNET
APOH	GeneCards and DisGeNET
GPX1	GeneCards and DisGeNET
PROC	GeneCards and DisGeNET
JAK1	GeneCards and DisGeNET
GIPR	GeneCards and DisGeNET
COL1A2	GeneCards and DisGeNET
CDKN1B	GeneCards and DisGeNET
MIR20B	GeneCards and DisGeNET
FRMD3	GeneCards and DisGeNET
PRSS1	GeneCards and DisGeNET
MMP3	GeneCards and DisGeNET
CUBN	GeneCards and DisGeNET
COL8A2	GeneCards and DisGeNET
ENTPD1	GeneCards and DisGeNET
ARAP1	GeneCards and DisGeNET
CASP9	GeneCards and DisGeNET
CHIT1	GeneCards and DisGeNET
CPT1A	GeneCards and DisGeNET
DIANPH	GeneCards and DisGeNET
OLR1	GeneCards and DisGeNET
TRIB3	GeneCards and DisGeNET
CYBB	GeneCards and DisGeNET
CDKN1A	GeneCards and DisGeNET
CD36	GeneCards and DisGeNET
DNMT1	GeneCards and DisGeNET
VDAC1	GeneCards and DisGeNET
CDC42	GeneCards and DisGeNET
ARG1	GeneCards and DisGeNET
FASN	GeneCards and DisGeNET
CXCR4	GeneCards and DisGeNET
SYK	GeneCards and DisGeNET
GJA1	GeneCards and DisGeNET
AXL	GeneCards and DisGeNET
SIRT6	GeneCards and DisGeNET
LAMB2	GeneCards and DisGeNET
MB	GeneCards and DisGeNET
MIR141	GeneCards and DisGeNET
XYLT2	GeneCards and DisGeNET
GSTT1	GeneCards and DisGeNET
NEAT1	GeneCards and DisGeNET
LYZ	GeneCards and DisGeNET
DDIT3	GeneCards and DisGeNET
RPS27A	GeneCards and DisGeNET
ARG2	GeneCards and DisGeNET
GPX3	GeneCards and DisGeNET
DUSP1	GeneCards and DisGeNET
PRSS2	GeneCards and DisGeNET
NTRK2	GeneCards and DisGeNET
AQP5	GeneCards and DisGeNET
SIRT4	GeneCards and DisGeNET
WNK1	GeneCards and DisGeNET
APEX1	GeneCards and DisGeNET
TGFBR2	GeneCards and DisGeNET
PRKCSH	GeneCards and DisGeNET
BECN1	GeneCards and DisGeNET
TSC22D1	GeneCards and DisGeNET
HPSE	GeneCards and DisGeNET
NSA2	GeneCards and DisGeNET
PYCARD	GeneCards and DisGeNET
FOXC1	GeneCards and DisGeNET
NOS1	GeneCards and DisGeNET
PDE5A	GeneCards and DisGeNET
MDM2	GeneCards and DisGeNET
GRB2	GeneCards and DisGeNET
DDAH2	GeneCards and DisGeNET
DKK1	GeneCards and DisGeNET
MIR31	GeneCards and DisGeNET
SQSTM1	GeneCards and DisGeNET
GSTP1	GeneCards and DisGeNET
ATN1	GeneCards and DisGeNET
PTK2B	GeneCards and DisGeNET
CXCR1	GeneCards and DisGeNET
ENG	GeneCards and DisGeNET
CHI3L1	GeneCards and DisGeNET
BDKRB2	GeneCards and DisGeNET
HOTAIR	GeneCards and DisGeNET
NAT2	GeneCards and DisGeNET
MIR378A	GeneCards and DisGeNET
PKM	GeneCards and DisGeNET
NOTCH2	GeneCards and DisGeNET
MIR23B	GeneCards and DisGeNET
NQO1	GeneCards and DisGeNET
ACVRL1	GeneCards and DisGeNET
XIST	GeneCards and DisGeNET
CYP24A1	GeneCards and DisGeNET
SRY	GeneCards and DisGeNET
SOST	GeneCards and DisGeNET
AQP1	GeneCards and DisGeNET
MCF2L2	GeneCards and DisGeNET
CCR1	GeneCards and DisGeNET
TERF1	GeneCards and DisGeNET
MMP7	GeneCards and DisGeNET
COL1A1	GeneCards and DisGeNET
DNMT3A	GeneCards and DisGeNET
LRPAP1	GeneCards and DisGeNET
PES1	GeneCards and DisGeNET
LGALS3	GeneCards and DisGeNET
MIR22	GeneCards and DisGeNET
MIRLET7B	GeneCards and DisGeNET
ITGB3	GeneCards and DisGeNET
DCN	GeneCards and DisGeNET
FUT8	GeneCards and DisGeNET
S100A9	GeneCards and DisGeNET
EZH2	GeneCards and DisGeNET
EGR1	GeneCards and DisGeNET
CXCL9	GeneCards and DisGeNET
MIR382	GeneCards and DisGeNET
CARS1	GeneCards and DisGeNET
VEGFC	GeneCards and DisGeNET
S100B	GeneCards and DisGeNET
THG1L	GeneCards and DisGeNET
UCA1	GeneCards and DisGeNET
JAG1	GeneCards and DisGeNET
NOX1	GeneCards and DisGeNET
IGFBP4	GeneCards and DisGeNET
PLAU	GeneCards and DisGeNET
SLC22A2	GeneCards and DisGeNET
PDGFRB	GeneCards and DisGeNET
AQP11	GeneCards and DisGeNET
KLF4	GeneCards and DisGeNET
SPARC	GeneCards and DisGeNET
BNIP3	GeneCards and DisGeNET
DNM1L	GeneCards and DisGeNET
VEGFB	GeneCards and DisGeNET
PITX2	GeneCards and DisGeNET
ERBB4	GeneCards and DisGeNET
MMP8	GeneCards and DisGeNET
DDOST	GeneCards and DisGeNET
CNDP2	GeneCards and DisGeNET
CD163	GeneCards and DisGeNET
LIMK2	GeneCards and DisGeNET
SMAD7	GeneCards and DisGeNET
PALLD	GeneCards and DisGeNET
VIM	GeneCards and DisGeNET
ATP6AP2	GeneCards and DisGeNET
TXN	GeneCards and DisGeNET
EPHX2	GeneCards and DisGeNET
FGF1	GeneCards and DisGeNET
MIR23A	GeneCards and DisGeNET
NTRK1	GeneCards and DisGeNET
AXIN2	GeneCards and DisGeNET
MIR485	GeneCards and DisGeNET
SNAI1	GeneCards and DisGeNET
TGFB3	GeneCards and DisGeNET
OPTN	GeneCards and DisGeNET
DUOX2	GeneCards and DisGeNET
MYD88	GeneCards and DisGeNET
ITGA2B	GeneCards and DisGeNET
SMAD1	GeneCards and DisGeNET
DNMT3B	GeneCards and DisGeNET
BSG	GeneCards and DisGeNET
CD68	GeneCards and DisGeNET
TALDO1	GeneCards and DisGeNET
ADAM10	GeneCards and DisGeNET
MIR200C	GeneCards and DisGeNET
ZEB1	GeneCards and DisGeNET
P2RX7	GeneCards and DisGeNET
MMP12	GeneCards and DisGeNET
LAMP2	GeneCards and DisGeNET
XYLT1	GeneCards and DisGeNET
IL22	GeneCards and DisGeNET
NFAT5	GeneCards and DisGeNET
FOXP1	GeneCards and DisGeNET
CD59	GeneCards and DisGeNET
MIR199B	GeneCards and DisGeNET
HYOU1	GeneCards and DisGeNET
ADH1B	GeneCards and DisGeNET
PROS1	GeneCards and DisGeNET
MIR424	GeneCards and DisGeNET
TGFBI	GeneCards and DisGeNET
NR1H3	GeneCards and DisGeNET
MIR150	GeneCards and DisGeNET
CASC2	GeneCards and DisGeNET
PPIA	GeneCards and DisGeNET
COL8A1	GeneCards and DisGeNET
ZNF236	GeneCards and DisGeNET
PSMA6	GeneCards and DisGeNET
SEMA3A	GeneCards and DisGeNET
SERPINB2	GeneCards and DisGeNET
SASH1	GeneCards and DisGeNET
UNC13B	GeneCards and DisGeNET
HSPA1B	GeneCards and DisGeNET
HAVCR2	GeneCards and DisGeNET
TRPC1	GeneCards and DisGeNET
EZR	GeneCards and DisGeNET
F2RL1	GeneCards and DisGeNET
CALD1	GeneCards and DisGeNET
TRAF6	GeneCards and DisGeNET
TREM1	GeneCards and DisGeNET
DEFA3	GeneCards and DisGeNET
CPB2	GeneCards and DisGeNET
NLRC4	GeneCards and DisGeNET
XRCC1	GeneCards and DisGeNET
MIR130B	GeneCards and DisGeNET
DRD3	GeneCards and DisGeNET
CYP2R1	GeneCards and DisGeNET
STIM1	GeneCards and DisGeNET
CDH13	GeneCards and DisGeNET
STS	GeneCards and DisGeNET
CCL20	GeneCards and DisGeNET
SPHK1	GeneCards and DisGeNET
ITGA1	GeneCards and DisGeNET
IL33	GeneCards and DisGeNET
MIR497	GeneCards and DisGeNET
HAS2	GeneCards and DisGeNET
MIOX	GeneCards and DisGeNET
S100A4	GeneCards and DisGeNET
ENO2	GeneCards and DisGeNET
SKIL	GeneCards and DisGeNET
ACCS	GeneCards and DisGeNET
MIR99B	GeneCards and DisGeNET
ITPR1	GeneCards and DisGeNET
MCAM	GeneCards and DisGeNET
MIR455	GeneCards and DisGeNET
F10	GeneCards and DisGeNET
CHN2	GeneCards and DisGeNET
E2F1	GeneCards and DisGeNET
ANG	GeneCards and DisGeNET
NR1I2	GeneCards and DisGeNET
MIRLET7C	GeneCards and DisGeNET
TYRO3	GeneCards and DisGeNET
DEFA1	GeneCards and DisGeNET
KLF6	GeneCards and DisGeNET
PHLPP1	GeneCards and DisGeNET
SDC2	GeneCards and DisGeNET
MMP10	GeneCards and DisGeNET
CXCL16	GeneCards and DisGeNET
GRN	GeneCards and DisGeNET
LTBP1	GeneCards and DisGeNET
UCHL1	GeneCards and DisGeNET
CASP7	GeneCards and DisGeNET
ZEB2	GeneCards and DisGeNET
ESM1	GeneCards and DisGeNET
HDAC4	GeneCards and DisGeNET
KIRREL1	GeneCards and DisGeNET
CNKSR3	GeneCards and DisGeNET
NDUFS3	GeneCards and DisGeNET
TWIST1	GeneCards and DisGeNET
SCAF4	GeneCards and DisGeNET
MASP2	GeneCards and DisGeNET
LGALS1	GeneCards and DisGeNET
IL19	GeneCards and DisGeNET
LRG1	GeneCards and DisGeNET
MAP2K2	GeneCards and DisGeNET
CYLD	GeneCards and DisGeNET
SOX2-OT	GeneCards and DisGeNET
ADAM17	GeneCards and DisGeNET
C5	GeneCards and DisGeNET
NTN1	GeneCards and DisGeNET
APLNR	GeneCards and DisGeNET
SCAF8	GeneCards and DisGeNET
MDK	GeneCards and DisGeNET
SKP2	GeneCards and DisGeNET
MIR34B	GeneCards and DisGeNET
MIR133B	GeneCards and DisGeNET
ALCAM	GeneCards and DisGeNET
ULK1	GeneCards and DisGeNET
HMCN1	GeneCards and DisGeNET
SMAD5	GeneCards and DisGeNET
CASP12	GeneCards and DisGeNET
SLC22A3	GeneCards and DisGeNET
IRAK1	GeneCards and DisGeNET
ANGPTL2	GeneCards and DisGeNET
SUV39H1	GeneCards and DisGeNET
MOK	GeneCards and DisGeNET
GSTK1	GeneCards and DisGeNET
ARAP1-AS2	GeneCards and DisGeNET
PTK2	GeneCards and DisGeNET
ACVR1	GeneCards and DisGeNET
RNF185	GeneCards and DisGeNET
FN3K	GeneCards and DisGeNET
CXCR2	GeneCards and DisGeNET
MIRLET7A3	GeneCards and DisGeNET
ERRFI1	GeneCards and DisGeNET
MIRLET7A2	GeneCards and DisGeNET
MIR152	GeneCards and DisGeNET
CALB1	GeneCards and DisGeNET
KLK1	GeneCards and DisGeNET
ARAP1-AS1	GeneCards and DisGeNET
ZFP36	GeneCards and DisGeNET
RENBP	GeneCards and DisGeNET
LRRC7	GeneCards and DisGeNET
GFPT2	GeneCards and DisGeNET
ADD2	GeneCards and DisGeNET
DES	GeneCards and DisGeNET
TET2	GeneCards and DisGeNET
EPAS1	GeneCards and DisGeNET
KHK	GeneCards and DisGeNET
SMAD6	GeneCards and DisGeNET
TNFRSF10D	GeneCards and DisGeNET
CADM1	GeneCards and DisGeNET
MIR137	GeneCards and DisGeNET
CDK5	GeneCards and DisGeNET
TIMM44	GeneCards and DisGeNET
HSPB2	GeneCards and DisGeNET
MIR29B1	GeneCards and DisGeNET
BRD4	GeneCards and DisGeNET
SRGAP2	GeneCards and DisGeNET
SLC2A12	GeneCards and DisGeNET
PLEKHH2	GeneCards and DisGeNET
OGN	GeneCards and DisGeNET
KCNH7	GeneCards and DisGeNET
ROCK2	GeneCards and DisGeNET
ELAVL1	GeneCards and DisGeNET
LCN1	GeneCards and DisGeNET
IRAK4	GeneCards and DisGeNET
F2R	GeneCards and DisGeNET
DDAH1	GeneCards and DisGeNET
CR1	GeneCards and DisGeNET
NAV3	GeneCards and DisGeNET
SOAT1	GeneCards and DisGeNET
GPR158	GeneCards and DisGeNET
VASH1	GeneCards and DisGeNET
KLF15	GeneCards and DisGeNET
NCALD	GeneCards and DisGeNET
KDM6A	GeneCards and DisGeNET
MIR1207	GeneCards and DisGeNET
PGC	GeneCards and DisGeNET
SETD7	GeneCards and DisGeNET
SOX6	GeneCards and DisGeNET
ACTA2	GeneCards and DisGeNET
MEP1B	GeneCards and DisGeNET
PTAFR	GeneCards and DisGeNET
FIS1	GeneCards and DisGeNET
IL1RL1	GeneCards and DisGeNET
GPRC5B	GeneCards and DisGeNET
ORAI1	GeneCards and DisGeNET
BGN	GeneCards and DisGeNET
GPX4	GeneCards and DisGeNET
PTPN6	GeneCards and DisGeNET
SAA2	GeneCards and DisGeNET
MIR4490	GeneCards and DisGeNET
RAPGEF5	GeneCards and DisGeNET
ACKR2	GeneCards and DisGeNET
SOSTDC1	GeneCards and DisGeNET
IQGAP1	GeneCards and DisGeNET
TNFAIP8	GeneCards and DisGeNET
BBOX1	GeneCards and DisGeNET
NOX5	GeneCards and DisGeNET
SFI1	GeneCards and DisGeNET
YAP1	GeneCards and DisGeNET
RAMP2	GeneCards and DisGeNET
IPPK	GeneCards and DisGeNET
LINC01619	GeneCards and DisGeNET
UBE2V1	GeneCards and DisGeNET
CD74	GeneCards and DisGeNET
UBE4A	GeneCards and DisGeNET
STIM2	GeneCards and DisGeNET
MTHFS	GeneCards and DisGeNET
GPRC5A	GeneCards and DisGeNET
SMN1	GeneCards and DisGeNET
RCAN1	GeneCards and DisGeNET
NUP62	GeneCards and DisGeNET
TRIAP1	GeneCards and DisGeNET
NOX3	GeneCards and DisGeNET
MIR320A	GeneCards and DisGeNET
BRD2	GeneCards and DisGeNET
PICK1	GeneCards and DisGeNET
DERL2	GeneCards and DisGeNET
SYT1	GeneCards and DisGeNET
GUCY1A1	GeneCards and DisGeNET
TBC1D31	GeneCards and DisGeNET
ARRB2	GeneCards and DisGeNET
PRMT1	GeneCards and DisGeNET
MSN	GeneCards and DisGeNET
ARF6	GeneCards and DisGeNET
MPRIP	GeneCards and DisGeNET
MAP1LC3A	GeneCards and DisGeNET
RAB38	GeneCards and DisGeNET
SLC7A2	GeneCards and DisGeNET
GREM2	GeneCards and DisGeNET
VAV1	GeneCards and DisGeNET
MIR374A	GeneCards and DisGeNET
CALCRL	GeneCards and DisGeNET
TSPYL2	GeneCards and DisGeNET
H2BS1	GeneCards and DisGeNET
ATP5F1B	GeneCards and DisGeNET
APOL3	GeneCards and DisGeNET
ADGRG1	GeneCards and DisGeNET
MIR379	GeneCards and DisGeNET
ACTG2	GeneCards and DisGeNET
CHPT1	GeneCards and DisGeNET
FBXW7	GeneCards and DisGeNET
C5AR1	GeneCards and DisGeNET
RIPK2	GeneCards and DisGeNET
CCNE1	GeneCards and DisGeNET
TRIP10	GeneCards and DisGeNET
MIR544A	GeneCards and DisGeNET
LPAR1	GeneCards and DisGeNET
SMPDL3B	GeneCards and DisGeNET
GRAP	GeneCards and DisGeNET
MIR302A	GeneCards and DisGeNET
FHL2	GeneCards and DisGeNET
MBL3P	GeneCards and DisGeNET
PDPN	GeneCards and DisGeNET
AZU1	GeneCards and DisGeNET
RB1CC1	GeneCards and DisGeNET
TNFAIP1	GeneCards and DisGeNET
LINC00472	GeneCards and DisGeNET
CCT2	GeneCards and DisGeNET
NLRC5	GeneCards and DisGeNET
CUL5	GeneCards and DisGeNET
TRDN	GeneCards and DisGeNET
C3AR1	GeneCards and DisGeNET
ZBTB16	GeneCards and DisGeNET
MIR98	GeneCards and DisGeNET
WWTR1	GeneCards and DisGeNET
VCAN	GeneCards and DisGeNET
FAR2	GeneCards and DisGeNET
SEPTIN7	GeneCards and DisGeNET
CORO2B	GeneCards and DisGeNET
TNS2	GeneCards and DisGeNET
ARRB1	GeneCards and DisGeNET
PAQR3	GeneCards and DisGeNET
RIPK3	GeneCards and DisGeNET
CFL1	GeneCards and DisGeNET
UTRN	GeneCards and DisGeNET
YBX1	GeneCards and DisGeNET
SMURF2	GeneCards and DisGeNET
ANKRD1	GeneCards and DisGeNET
MARK2	GeneCards and DisGeNET
GLIPR2	GeneCards and DisGeNET
CYP3A4	GeneCards and DrugBank
SLC2A9	GeneCards and DrugBank
SLC22A12	GeneCards and DrugBank
BCHE	GeneCards and DrugBank
ABCB1	GeneCards and DrugBank
CYP2C9	GeneCards and DrugBank
BDKRB1	GeneCards and DrugBank
CYP2C19	GeneCards and DrugBank
ABCG2	GeneCards and DrugBank
CES1	GeneCards and DrugBank
SLC15A2	GeneCards and DrugBank
ABCC2	GeneCards and DrugBank
SLC15A1	GeneCards and DrugBank
SLCO1A2	GeneCards and DrugBank
LTA4H	GeneCards and DrugBank
DRD2	GeneCards and TTD
FCGR2A	GeneCards and TTD
SLC33A1	DisGeNET and TTD
MAPK12	TTD
ADRA2C	TTD
CTGF	TTD
UGT1A9	DrugBank
UGT2B4	DrugBank
ORM1	DrugBank
CYP2C8	DrugBank
UGT1A3	DrugBank
ABCB11	DrugBank
SFRP4	DrugBank
UGT1A1	DrugBank
UGT1A10	DrugBank
UGT2B7	DrugBank
UGT2B17	DrugBank
SLC22A7	DrugBank
SLCO1B3	DrugBank
SLCO1B1	DrugBank
GPD2	OMIM
HMGA1	OMIM
IER3IP1	OMIM
MAPK8IP1	OMIM
RRAD	OMIM
TBC1D4	OMIM
DGKH	DisGeNET
TINAG	DisGeNET
MYCN	DisGeNET
PRKCE	DisGeNET
VDAC2	DisGeNET
ALPK1	DisGeNET
GSK3B	DisGeNET
KEAP1	DisGeNET
HDAC5	DisGeNET
GRK2	DisGeNET
GRK3	DisGeNET
GRK4	DisGeNET
GRK6	DisGeNET
HDAC2	DisGeNET
MLLT3	DisGeNET
AZIN1	DisGeNET
DECR1	DisGeNET
MMRN1	DisGeNET
GABPA	DisGeNET
DRG1	DisGeNET
PDE3A	DisGeNET
PIK3CB	DisGeNET
PIK3CD	DisGeNET
ENOX1	DisGeNET
IGAN1	DisGeNET
LARGE1	DisGeNET
EHMT1	DisGeNET
ZGLP1	DisGeNET
STAM2	DisGeNET
AHSA1	DisGeNET
CRK	DisGeNET
RNF19A	DisGeNET
POLDIP2	DisGeNET
HDLBP	DisGeNET
HEBP1	DisGeNET
PNPLA2	DisGeNET
ROS1	DisGeNET
GORASP1	DisGeNET
VPS51	DisGeNET
BEST1	DisGeNET
SLBP	DisGeNET
AIMP2	DisGeNET
SELENBP1	DisGeNET
GRAP2	DisGeNET
PGR-AS1	DisGeNET
NRK	DisGeNET
IHG1	DisGeNET
CCHCR1	DisGeNET
PRKAA1	DisGeNET
RPS19	DisGeNET
LOH19CR1	DisGeNET
KHDRBS1	DisGeNET
DBA2	DisGeNET
CRMP1	DisGeNET
DGKA	DisGeNET
DAPK2	DisGeNET
OR10A4	DisGeNET
MIR29B2	DisGeNET
MIR30C1	DisGeNET
MIR30C2	DisGeNET
SLC52A1	DisGeNET
TGFA	DisGeNET
DENR	DisGeNET
XPR1	DisGeNET
EBI3	DisGeNET
KLF2	DisGeNET
RN7SL263P	DisGeNET
MCS+9.7	DisGeNET
H3P10	DisGeNET
SLCO6A1	DisGeNET
NRG4	DisGeNET
GPBAR1	DisGeNET
CYP4B1	DisGeNET
ELAVL2	DisGeNET
FGF13	DisGeNET
LPAR3	DisGeNET
IL17B	DisGeNET
GTF2H1	DisGeNET
RMC1	DisGeNET
LOXL2	DisGeNET
LRP6	DisGeNET
MIR15B	DisGeNET
MIR203A	DisGeNET
TRNT	DisGeNET
IL20	DisGeNET
DCTN4	DisGeNET
PLEKHO1	DisGeNET
ISYNA1	DisGeNET
PTPA	DisGeNET
SEMA6A	DisGeNET
MRTFA	DisGeNET
ZNF410	DisGeNET
BCR	DisGeNET
RRAS	DisGeNET
HHIP	DisGeNET
SMN2	DisGeNET
SNRNP70	DisGeNET
STK11	DisGeNET
MAP3K7	DisGeNET
TBX1	DisGeNET
NR2C2	DisGeNET
POTEF	DisGeNET
YY1	DisGeNET
MIR770	DisGeNET
LIN28A	DisGeNET
ABCC11	DisGeNET
SOCS2	DisGeNET
NR1H4	DisGeNET
CDH2	DisGeNET
MIR874	DisGeNET
LINC00462	DisGeNET
MFT2	DisGeNET
MIR320E	DisGeNET
MIR3196	DisGeNET
MIR23C	DisGeNET
LINC00968	DisGeNET
MICOS10-NBL1	DisGeNET
MIR4756	DisGeNET
MBNL2	DisGeNET
LOC102724334	DisGeNET
TP53COR1	DisGeNET
AKR1A1	DisGeNET
TFG	DisGeNET
BASP1	DisGeNET
FST	DisGeNET
EIF3M	DisGeNET
CEBPB	DisGeNET
WSPAR	DisGeNET
CAMKK2	DisGeNET
MTCO2P12	DisGeNET
PLK2	DisGeNET
MALT1	DisGeNET
PACSIN2	DisGeNET
VSIG4	DisGeNET
ADCY8	DisGeNET
ESCO1	DisGeNET
PLIN2	DisGeNET
CMKLR1	DisGeNET
COL6A3	DisGeNET
RBM45	DisGeNET
COL11A2	DisGeNET
COX8A	DisGeNET
CPT1B	DisGeNET
CREM	DisGeNET
SRXN1	DisGeNET
CRYZ	DisGeNET
CSF1R	DisGeNET
PWAR1	DisGeNET
CSNK2A2	DisGeNET
CDAN1	DisGeNET
IL34	DisGeNET
CST2	DisGeNET
SLC30A7	DisGeNET
CTSD	DisGeNET
PLB1	DisGeNET
RMDN2	DisGeNET
FITM1	DisGeNET
DBP	DisGeNET
DDT	DisGeNET
CFD	DisGeNET
AFM	DisGeNET
DMP1	DisGeNET
DPYD	DisGeNET
DPYS	DisGeNET
DSPP	DisGeNET
DUSP4	DisGeNET
E2F3	DisGeNET
EDA	DisGeNET
EFNA1	DisGeNET
ARID2	DisGeNET
ELF3	DisGeNET
ENPEP	DisGeNET
PRSS55	DisGeNET
EPHA1	DisGeNET
EPHB2	DisGeNET
EREG	DisGeNET
ETF1	DisGeNET
FGF11	DisGeNET
GPC5	DisGeNET
MRAS	DisGeNET
DAAM1	DisGeNET
SMG1	DisGeNET
ERP44	DisGeNET
FLT4	DisGeNET
SLC9A8	DisGeNET
CRTC1	DisGeNET
SRRM2	DisGeNET
FPR2	DisGeNET
PLA2G15	DisGeNET
POU2F3	DisGeNET
IPCEF1	DisGeNET
GJB1	DisGeNET
PALD1	DisGeNET
INTU	DisGeNET
RBMS3	DisGeNET
HPGDS	DisGeNET
RABGEF1	DisGeNET
AMT	DisGeNET
FFAR2	DisGeNET
REM1	DisGeNET
GSTM2	DisGeNET
HMGN1	DisGeNET
NR4A1	DisGeNET
HNMT	DisGeNET
HPT	DisGeNET
LINC01139	DisGeNET
ID2	DisGeNET
GOLGA6A	DisGeNET
IDUA	DisGeNET
IFNA13	DisGeNET
HCN1	DisGeNET
RBPJ	DisGeNET
IL6ST	DisGeNET
IL12RB1	DisGeNET
INHBC	DisGeNET
ABCC6	DisGeNET
KPNA2	DisGeNET
KRT16	DisGeNET
LAD1	DisGeNET
LCK	DisGeNET
MIR132	DisGeNET
MIR134	DisGeNET
MIR154	DisGeNET
MIR182	DisGeNET
MIR184	DisGeNET
MIR188	DisGeNET
MIR206	DisGeNET
MIR221	DisGeNET
MIR27B	DisGeNET
MIR30B	DisGeNET
MIR30E	DisGeNET
MIR33A	DisGeNET
MIR96	DisGeNET
MAP6	DisGeNET
MCM3	DisGeNET
MAP3K1	DisGeNET
MFAP1	DisGeNET
KMT2A	DisGeNET
MSX2	DisGeNET
COX1	DisGeNET
COX2	DisGeNET
MYH2	DisGeNET
NBL1	DisGeNET
NCK1	DisGeNET
NCL	DisGeNET
NDN	DisGeNET
NFIA	DisGeNET
NFIB	DisGeNET
NFIC	DisGeNET
NFIX	DisGeNET
ATP2A2	DisGeNET
ACR	DisGeNET
PEBP1	DisGeNET
PAEP	DisGeNET
PARN	DisGeNET
TAS2R13	DisGeNET
ACOX1	DisGeNET
RMDN1	DisGeNET
SIRT7	DisGeNET
PDGFRA	DisGeNET
GDE1	DisGeNET
PIAS4	DisGeNET
PDK1	DisGeNET
PIK3C2B	DisGeNET
PIK3R2	DisGeNET
PIN1	DisGeNET
DUOX1	DisGeNET
TERF2IP	DisGeNET
PPBP	DisGeNET
ANO1	DisGeNET
PPP1R8	DisGeNET
RMDN3	DisGeNET
RCBTB1	DisGeNET
MIR449A	DisGeNET
STAP2	DisGeNET
SYBU	DisGeNET
VAC14	DisGeNET
ACSS2	DisGeNET
PNO1	DisGeNET
NMUR2	DisGeNET
KMT5AP1	DisGeNET
PTBP1	DisGeNET
MIR18B	DisGeNET
MIR451A	DisGeNET
MIR488	DisGeNET
MIR503	DisGeNET
RAB3A	DisGeNET
RAP1A	DisGeNET
RDX	DisGeNET
RFC1	DisGeNET
RNASE2	DisGeNET
RPL36A	DisGeNET
RPLP0	DisGeNET
RPS6	DisGeNET
MIR486-1	DisGeNET
SCD	DisGeNET
CCL1	DisGeNET
CXCL6	DisGeNET
TNMD	DisGeNET
NORAD	DisGeNET
MARCKSL1	DisGeNET
NCF1	DisGeNET
FSCN1	DisGeNET
SOS1	DisGeNET
SREBF2	DisGeNET
STC1	DisGeNET
MIR449B	DisGeNET
TCF7	DisGeNET
TERC	DisGeNET
TFPI	DisGeNET
TPD52	DisGeNET
CRISP2	DisGeNET
TRAF5	DisGeNET
TRPC5	DisGeNET
UGT8	DisGeNET
WARS1	DisGeNET
YWHAZ	DisGeNET
CNBP	DisGeNET
MZF1	DisGeNET
DUSP26	DisGeNET
EFHD2	DisGeNET
FSD1	DisGeNET
NTT	DisGeNET
SLC52A2	DisGeNET
RHBDF2	DisGeNET
NLRX1	DisGeNET
GSDMD	DisGeNET
VASH2	DisGeNET
COL18A1	DisGeNET
TRIM11	DisGeNET
AKAP1	DisGeNET
TAM	DisGeNET
FSD1L	DisGeNET
MIXL1	DisGeNET
MINDY4	DisGeNET
WDR83	DisGeNET
NR0B2	DisGeNET
MAK16	DisGeNET
SPZ1	DisGeNET
RPPH1	DisGeNET
B3GALNT1	DisGeNET
ALKBH1	DisGeNET
BTRC	DisGeNET
HSPB3	DisGeNET
CCNG2	DisGeNET
ESAM	DisGeNET
SLC16A3	DisGeNET
AIFM1	DisGeNET
DSEL	DisGeNET
MTDH	DisGeNET
CD5L	DisGeNET
MSC	DisGeNET
MFHAS1	DisGeNET
COPB2	DisGeNET
MYOCD	DisGeNET
SOCS5	DisGeNET
NUAK1	DisGeNET
DMTF1	DisGeNET
PTF1A	GeneCards
ALMS1	GeneCards
BSCL2	GeneCards
HLA-DQB1	GeneCards
MT-TL1	GeneCards
TTR	GeneCards
MT-ND1	GeneCards
ADRB3	GeneCards
POMC	GeneCards
AGPAT2	GeneCards
IFIH1	GeneCards
NEUROG3	GeneCards
MC4R	GeneCards
AIRE	GeneCards
ADRB2	GeneCards
WRN	GeneCards
PCBD1	GeneCards
BMP6	GeneCards
MAFB	GeneCards
FOS	GeneCards
NPHP1	GeneCards
CD79A	GeneCards
HRAS	GeneCards
F2	GeneCards
G6PC	GeneCards
PLAGL1	GeneCards
GATA6	GeneCards
CASR	GeneCards
GNAS	GeneCards
APOA2	GeneCards
GAD2	GeneCards
CLCNKB	GeneCards
HK1	GeneCards
DMPK	GeneCards
MUC1	GeneCards
HLA-DPB1	GeneCards
TLR5	GeneCards
RFX6	GeneCards
HPRT1	GeneCards
NAGLU	GeneCards
AMBP	GeneCards
MT-TE	GeneCards
AGRP	GeneCards
MT-ND4	GeneCards
MIR17	GeneCards
SST	GeneCards
PTPRN	GeneCards
FGA	GeneCards
CISD2	GeneCards
MIR140	GeneCards
TSC2	GeneCards
NPHP4	GeneCards
MIR483	GeneCards
TH	GeneCards
HYMAI	GeneCards
SLC19A2	GeneCards
PRODH	GeneCards
COL4A3	GeneCards
GAD1	GeneCards
RHO	GeneCards
CAVIN1	GeneCards
IDDM7	GeneCards
IDDM8	GeneCards
IDDM4	GeneCards
BBS2	GeneCards
LHX1	GeneCards
IDDM13	GeneCards
IDDM11	GeneCards
NAMPT	GeneCards
IDDM3	GeneCards
INS-IGF2	GeneCards
MT-CO2	GeneCards
SELE	GeneCards
CEP290	GeneCards
CDKN3	GeneCards
HBB	GeneCards
H2AC18	GeneCards
HBA1	GeneCards
SERPINB7	GeneCards
CFTR	GeneCards
MEN1	GeneCards
COL4A4	GeneCards
GGT1	GeneCards
IGFBP2	GeneCards
CD4	GeneCards
HMGCR	GeneCards
GAPDH	GeneCards
IDDM15	GeneCards
IDDM6	GeneCards
MT-TK	GeneCards
IDDM17	GeneCards
AR	GeneCards
BBS1	GeneCards
IDDM23	GeneCards
IDDM24	GeneCards
MT-CO1	GeneCards
IDDM18	GeneCards
PF4	GeneCards
TPO	GeneCards
HHEX	GeneCards
GCKR	GeneCards
HLA-A	GeneCards
ACP1	GeneCards
CFHR1	GeneCards
COG2	GeneCards
PAX6	GeneCards
RPGRIP1L	GeneCards
TMEM67	GeneCards
GFAP	GeneCards
BBS7	GeneCards
MT-ND6	GeneCards
LCAT	GeneCards
CRYAA	GeneCards
APOC2	GeneCards
TLR9	GeneCards
TLR3	GeneCards
BBS4	GeneCards
SNRPN	GeneCards
LMX1B	GeneCards
SHH	GeneCards
PRKCD	GeneCards
IFT88	GeneCards
MT-TS2	GeneCards
NPHP3	GeneCards
GLA	GeneCards
SERPINA3	GeneCards
LEPQTL1	GeneCards
AHI1	GeneCards
REG1A	GeneCards
COQ2	GeneCards
FASLG	GeneCards
ICOSLG	GeneCards
SCT	GeneCards
MT-ATP6	GeneCards
CD8A	GeneCards
PGF	GeneCards
ELN	GeneCards
MKS1	GeneCards
NKX6-1	GeneCards
PRL	GeneCards
PTPN1	GeneCards
MT-CO3	GeneCards
TREX1	GeneCards
PMM2	GeneCards
HSPD1	GeneCards
CFH	GeneCards
CDKN1C	GeneCards
BBS5	GeneCards
POLG	GeneCards
MT-ND5	GeneCards
KIF7	GeneCards
IGF2R	GeneCards
IFT140	GeneCards
IFT172	GeneCards
NGF	GeneCards
CPE	GeneCards
CD28	GeneCards
TTC21B	GeneCards
SLC30A10	GeneCards
SRC	GeneCards
UBD	GeneCards
CYP21A2	GeneCards
CYP1A2	GeneCards
TAP2	GeneCards
CD40	GeneCards
LNPEP	GeneCards
CDC123	GeneCards
PRTN3	GeneCards
PTPRN2	GeneCards
PPY	GeneCards
CASP1	GeneCards
DLK1	GeneCards
INF2	GeneCards
ICA1	GeneCards
TLR1	GeneCards
PPP1R15B	GeneCards
TMEM216	GeneCards
MT-TW	GeneCards
SLC5A4	GeneCards
THADA	GeneCards
MT-TQ	GeneCards
KCNQ1OT1	GeneCards
HK2	GeneCards
C4A	GeneCards
ERN1	GeneCards
SDCCAG8	GeneCards
SAMHD1	GeneCards
F8	GeneCards
TAP1	GeneCards
PKD2	GeneCards
TG	GeneCards
MT-TF	GeneCards
MT-TS1	GeneCards
BRAF	GeneCards
NTS	GeneCards
OFD1	GeneCards
RPGR	GeneCards
CCND1	GeneCards
FOXA2	GeneCards
TLR10	GeneCards
CFHR2	GeneCards
ESR2	GeneCards
F3	GeneCards
SNCA	GeneCards
G6PC2	GeneCards
PTPN3	GeneCards
MT-TH	GeneCards
COL4A2	GeneCards
H19	GeneCards
GATA3	GeneCards
IFT80	GeneCards
PCK1	GeneCards
TNFSF11	GeneCards
TLR8	GeneCards
CD86	GeneCards
JAZF1	GeneCards
HBA2	GeneCards
TRPV4	GeneCards
AGXT	GeneCards
ROBO2	GeneCards
PCK2	GeneCards
HTR1A	GeneCards
ONECUT1	GeneCards
CCL11	GeneCards
TLR6	GeneCards
PSMB8	GeneCards
KDM4C	GeneCards
BLM	GeneCards
TNFRSF25	GeneCards
TLR7	GeneCards
OXT	GeneCards
FGF8	GeneCards
TWNK	GeneCards
SIM1	GeneCards
ISL1	GeneCards
CNTF	GeneCards
CFB	GeneCards
FXYD2	GeneCards
RFC2	GeneCards
WDR19	GeneCards
GAL	GeneCards
APP	GeneCards
GRHPR	GeneCards
PRDM10	GeneCards
CYCS	GeneCards
MIR199A1	GeneCards
CC2D2A	GeneCards
WDR4	GeneCards
FABP12	GeneCards
NR3C1	GeneCards
IFT27	GeneCards
HLA-DMA	GeneCards
MIR144	GeneCards
PCSK2	GeneCards
PRKAR1A	GeneCards
CRH	GeneCards
BSND	GeneCards
TBX18	GeneCards
SERPINC1	GeneCards
NR1H2	GeneCards
MAPT	GeneCards
C12orf43	GeneCards
PSTPIP1	GeneCards
HLA-DMB	GeneCards
ARNTL	GeneCards
KRAS	GeneCards
PKHD1	GeneCards
MASP1	GeneCards
SCGB1A1	GeneCards
TMEM231	GeneCards
MKRN3	GeneCards
ADAR	GeneCards
INVS	GeneCards
PBX1	GeneCards
PTPRC	GeneCards
RPS6KB1	GeneCards
PLCG1	GeneCards
NPS	GeneCards
VIPAS39	GeneCards
MAF	GeneCards
MT-ND2	GeneCards
FBN1	GeneCards
PDGFB	GeneCards
PDCD1	GeneCards
SLC22A11	GeneCards
F9	GeneCards
SURF1	GeneCards
SYNPO	GeneCards
GJB2	GeneCards
TFAM	GeneCards
MIR142	GeneCards
MTTP	GeneCards
SERPINF2	GeneCards
LRBA	GeneCards
MIR146B	GeneCards
MEST	GeneCards
TNFRSF10A	GeneCards
HLA-DRB3	GeneCards
PLAT	GeneCards
RNASEH2A	GeneCards
ZNF423	GeneCards
FOXM1	GeneCards
IL7R	GeneCards
WDTC1	GeneCards
GZMB	GeneCards
CLTRN	GeneCards
CCL3	GeneCards
PSMB9	GeneCards
CS	GeneCards
HLA-E	GeneCards
ACSL4	GeneCards
RNASEH2C	GeneCards
RNASEH2B	GeneCards
PDE11A	GeneCards
KCNJ1	GeneCards
PLEK	GeneCards
PODXL	GeneCards
HSP90AA1	GeneCards
MET	GeneCards
PIK3C2A	GeneCards
DDC	GeneCards
KCNJ10	GeneCards
RET	GeneCards
ARMC5	GeneCards
VPS33B	GeneCards
MIR196A1	GeneCards
CDIPT	GeneCards
CD274	GeneCards
PKLR	GeneCards
GPT	GeneCards
MIR216A	GeneCards
PAPPA	GeneCards
ADCYAP1	GeneCards
ARL3	GeneCards
CTNS	GeneCards
CDK4	GeneCards
IGF2-AS	GeneCards
ESRRA	GeneCards
ITGAX	GeneCards
GHRH	GeneCards
NRAS	GeneCards
GUSB	GeneCards
CDH4	GeneCards
IGHV4-38-2	GeneCards
NSD1	GeneCards
HLA-DQA2	GeneCards
CD69	GeneCards
INSM2	GeneCards
MEG8	GeneCards
MIR28	GeneCards
CLDN16	GeneCards
CREBBP	GeneCards
NTF3	GeneCards
ITGA8	GeneCards
UFM1	GeneCards
CDK5RAP3	GeneCards
DDRGK1	GeneCards
UFL1	GeneCards
L1CAM	GeneCards
COMT	GeneCards
CELA3B	GeneCards
SOX17	GeneCards
STYX	GeneCards
GNRH1	GeneCards
TMEM138	GeneCards
INPP5E	GeneCards
RECQL4	GeneCards
LOC108783645	GeneCards
MIR181A1	GeneCards
MYOD1	GeneCards
OAS1	GeneCards
CIITA	GeneCards
CSN2	GeneCards
GIP	GeneCards
MT-ND3	GeneCards
IPW	GeneCards
MAPK10	GeneCards
SPG7	GeneCards
PRPF8	GeneCards
NUDT10	GeneCards
TSHR	GeneCards
ENO1	GeneCards
GNB3	GeneCards
WDR35	GeneCards
SHROOM3	GeneCards
KIAA0586	GeneCards
UBASH3A	GeneCards
HAMP	GeneCards
ITLN1	GeneCards
KIR3DL1	GeneCards
SEL1L	GeneCards
SLC30A9	GeneCards
GDNF	GeneCards
CDH1	GeneCards
HNF4G	GeneCards
NRP1	GeneCards
IQCB1	GeneCards
ANGPTL8	GeneCards
GYS1	GeneCards
DARS2	GeneCards
BAMBI	GeneCards
TOR1A	GeneCards
ZMPSTE24	GeneCards
NRL	GeneCards
DDX41	GeneCards
PRSS16	GeneCards
TNFRSF11A	GeneCards
CSF1	GeneCards
MICA	GeneCards
NPTX2	GeneCards
CD3D	GeneCards
TRAF3IP1	GeneCards
PRPS1	GeneCards
DYNC2H1	GeneCards
SNHG6	GeneCards
CDH5	GeneCards
MT-ATP8	GeneCards
ADA	GeneCards
CDH23	GeneCards
CYP1A1	GeneCards
PAGR1	GeneCards
MIR26B	GeneCards
ATF4	GeneCards
BAX	GeneCards
SNHG18	GeneCards
PPOX	GeneCards
MIR148B	GeneCards
BAZ1B	GeneCards
CEP104	GeneCards
KLKB1	GeneCards
SERPINA12	GeneCards
TRPV1	GeneCards
NEU1	GeneCards
LIG4	GeneCards
RYR1	GeneCards
RPGRIP1	GeneCards
EDNRB	GeneCards
DMD	GeneCards
FREM2	GeneCards
ACP5	GeneCards
SLC4A4	GeneCards
AHR	GeneCards
NDUFV2	GeneCards
MT-TL2	GeneCards
CLDN19	GeneCards
FAM167A	GeneCards
MIR9-1	GeneCards
TBL2	GeneCards
JCHAIN	GeneCards
CARTPT	GeneCards
ALAD	GeneCards
CPOX	GeneCards
EIF2S1	GeneCards
NDUFAF2	GeneCards
CISD1	GeneCards
NDUFS8	GeneCards
NDUFA1	GeneCards
NDUFB3	GeneCards
TMEM126B	GeneCards
MT-TI	GeneCards
GTF2I	GeneCards
CCK	GeneCards
MNX1	GeneCards
MT-CYB	GeneCards
POMGNT1	GeneCards
PRKCZ	GeneCards
LIMK1	GeneCards
SP3	GeneCards
GTF2IRD1	GeneCards
CLIP2	GeneCards
MT-TV	GeneCards
UBA5	GeneCards
RTL1	GeneCards
TSPAN8	GeneCards
DHDDS	GeneCards
PSMA5	GeneCards
FGFR1	GeneCards
IARS2	GeneCards
BAD	GeneCards
SCNN1B	GeneCards
CAMK1D	GeneCards
CFAP47	GeneCards
TEK	GeneCards
SCNN1A	GeneCards
ERBB2	GeneCards
H6PD	GeneCards
HDC	GeneCards
NUP107	GeneCards
TTC8	GeneCards
GSN	GeneCards
TOMM40	GeneCards
DYNC2I2	GeneCards
MIR106B	GeneCards
SCARB1	GeneCards
VHL	GeneCards
SLC9A1	GeneCards
TFR2	GeneCards
CABIN1	GeneCards
HCRT	GeneCards
NKX2-2	GeneCards
FGFR3	GeneCards
SMURF1	GeneCards
FCAR	GeneCards
SMAD4	GeneCards
RHAG	GeneCards
PPP1R3B	GeneCards
AXIN1	GeneCards
MMP14	GeneCards
CALCA	GeneCards
EPHB4	GeneCards
TYMP	GeneCards
CDKN2B	GeneCards
P3H4	GeneCards
HNRNPUL2-BSCL2	GeneCards
FAM20A	GeneCards
EIF2AK4	GeneCards
LEMD3	GeneCards
MIA2	GeneCards
RBP1	GeneCards
SLC9B1	GeneCards
ANXA5	GeneCards
EFEMP1	GeneCards
RECK	GeneCards
BAIAP2L1	GeneCards
BTNL2	GeneCards
AFP	GeneCards
CGA	GeneCards
OCRL	GeneCards
MYO7A	GeneCards
PAFAH1B1	GeneCards
KCNK16	GeneCards
BCS1L	GeneCards
SNORD116@	GeneCards
COL7A1	GeneCards
PRCD	GeneCards
NPPC	GeneCards
WAS	GeneCards
SLC26A4	GeneCards
IL11	GeneCards
PNLIP	GeneCards
CISD3	GeneCards
CYB5R4	GeneCards
CCKAR	GeneCards
CYP2D6	GeneCards
MPZ	GeneCards
LBR	GeneCards
C2CD4A	GeneCards
CACNA1H	GeneCards
GRB10	GeneCards
SCG5	GeneCards
EXO1	GeneCards
C2CD4B	GeneCards
IL12B	GeneCards
CLCN5	GeneCards
NR5A2	GeneCards
ABCG1	GeneCards
CSF2	GeneCards
CTSK	GeneCards
DRD5	GeneCards
SDHB	GeneCards
KLF14	GeneCards
MT-TT	GeneCards
SHC1	GeneCards
BLOC1S1	GeneCards
MIAT	GeneCards
SERPINA1	GeneCards
ERCC6	GeneCards
PDSS2	GeneCards
DSTYK	GeneCards
USF1	GeneCards
WDR20	GeneCards
ZNHIT3	GeneCards
SCNN1G	GeneCards
MT-TP	GeneCards
ALDOB	GeneCards
CSF3	GeneCards
MIR149	GeneCards
RHOD	GeneCards
MIR32	GeneCards
MT-TN	GeneCards
MT-TA	GeneCards
NLRP7	GeneCards
MED13L	GeneCards
GLIS2	GeneCards
ZFAND3	GeneCards
IDH2	GeneCards
ALAS2	GeneCards
KMT2D	GeneCards
EBF3	GeneCards
SLC26A1	GeneCards
IFNB1	GeneCards
DYNC2LI1	GeneCards
CFI	GeneCards
TUSC3	GeneCards
FOXO3	GeneCards
TCF4	GeneCards
TAC1	GeneCards
FOXA3	GeneCards
GCC1	GeneCards
SLC34A1	GeneCards
NAGA	GeneCards
F7	GeneCards
EXOSC4	GeneCards
C1GALT1	GeneCards
BBS12	GeneCards
ACHE	GeneCards
BBS10	GeneCards
NCS1	GeneCards
TMEM126A	GeneCards
EIF2AK1	GeneCards
LAMA1	GeneCards
NR2F2	GeneCards
HRH2	GeneCards
HTRA1	GeneCards
FOXP2	GeneCards
MKKS	GeneCards
BHLHA15	GeneCards
NKX6-2	GeneCards
PDP1	GeneCards
MIR19A	GeneCards
PPP1R15A	GeneCards
FABP3	GeneCards
ATXN3	GeneCards
MYC	GeneCards
MTR	GeneCards
MIR200A	GeneCards
CD34	GeneCards
GANAB	GeneCards
BMP3	GeneCards
SLC2A3	GeneCards
ATXN10	GeneCards
CD19	GeneCards
KCNJ3	GeneCards
LOC108251801	GeneCards
CISH	GeneCards
PEG3	GeneCards
USB1	GeneCards
ACADS	GeneCards
PLUT	GeneCards
MCHR1	GeneCards
PROM1	GeneCards
EYA1	GeneCards
MIR122	GeneCards
HSPA8	GeneCards
FMR1	GeneCards
ADA2	GeneCards
CXCL1	GeneCards
MIR26A1	GeneCards
HLA-C	GeneCards
IDH1	GeneCards
NGLY1	GeneCards
CFAP410	GeneCards
UROD	GeneCards
EPRS1	GeneCards
RECQL5	GeneCards
RNLS	GeneCards
GABRR3	GeneCards
KIF12	GeneCards
TBC1D3G	GeneCards
KIF3A	GeneCards
FTH1	GeneCards
POLD1	GeneCards
ITGA4	GeneCards
YWHAE	GeneCards
GNAS-AS1	GeneCards
ANPEP	GeneCards
MT-RNR1	GeneCards
IL12A	GeneCards
FAM50B	GeneCards
ZDBF2	GeneCards
NLRP5	GeneCards
GBA	GeneCards
ADCY10	GeneCards
NEK9	GeneCards
CDK2	GeneCards
NNAT	GeneCards
ACSL1	GeneCards
CD1D	GeneCards
DBH	GeneCards
TBX21	GeneCards
NRIP1	GeneCards
KCNN4	GeneCards
B9D2	GeneCards
WDR73	GeneCards
DYNC2I1	GeneCards
CBS	GeneCards
DOCK8	GeneCards
SLC39A8	GeneCards
CD63	GeneCards
STUB1	GeneCards
LGALS4	GeneCards
HLA-DRB4	GeneCards
NEK8	GeneCards
APTX	GeneCards
U2AF1	GeneCards
PEG10	GeneCards
MVK	GeneCards
MAP2K1	GeneCards
CEBPA	GeneCards
PLA2G2A	GeneCards
DDX58	GeneCards
MERTK	GeneCards
LDHA	GeneCards
IL10RA	GeneCards
DUSP2	GeneCards
RUNX2	GeneCards
STAT4	GeneCards
CD55	GeneCards
ECE1	GeneCards
MRE11	GeneCards
RHOA	GeneCards
AGRN	GeneCards
HTT	GeneCards
NLRP2	GeneCards
CGAS	GeneCards
SLC6A4	GeneCards
RAD51	GeneCards
DNMT3L	GeneCards
RASGRF1	GeneCards
KHDC3L	GeneCards
PARD6G-AS1	GeneCards
SIX1	GeneCards
ARL13B	GeneCards
B9D1	GeneCards
XIAP	GeneCards
ITGB2	GeneCards
ITGAE	GeneCards
LECT2	GeneCards
TNNI3	GeneCards
PRKD1	GeneCards
TCTN2	GeneCards
HELLS	GeneCards
THSD7A	GeneCards
FGFR2	GeneCards
RETNLB	GeneCards
LIFR	GeneCards
CDK6	GeneCards
HCRTR2	GeneCards
SOX9	GeneCards
MIR423	GeneCards
CNTLN	GeneCards
IFT122	GeneCards
KITLG	GeneCards
TNFRSF18	GeneCards
SRD5A3	GeneCards
SRGAP1	GeneCards
[truncated: 1,703 more rows]
